# Supplementary material for: Longitudinal Gut Microbiota Tracking Reveals the Persistent Spread of Mobile Genes and HGT-Driven Community Stabilization
Source: Research Square preprint supplement (doi:10.21203/rs.3.rs-6509357/v1), 2025-05-07
Supplement: Supplementary file 1 [file 8802406993337625a4d3eae4.xlsx]

## Sheet: Content
Table S1. Information of MAGs
Table S2. Information of HGT events
Table S3. HGT region information
Table S4. The result of enriched function of mobile genes
Table S5. Species pagenome and microbial community categories
Table S6. Species co-abudance, HGT rates and phylogenetic distance
Table S7. Association result of non-antibiotic drugs and mobile genes
Table S8. Benchmark with WAAFLE
Table S9.Species traits and HGT network degree centrality
Table S10. Antibiotics resistant genes annotation

## Sheet: Table S1. Genome_QC
Table S1. Information of MAGs
genome	completeness	contamination	strain_heterogeneity	length	N50	SGB	taxo	name	dis	primary_cluster	secondary_cluster	Kingdom	Phylum	Class	Order	Family	Genus	Species	Group_cluster
s_9002000001186403_24.strict	95.35	0.15	0	1559629	16663	kSGB_8002	Species	k__Bacteria|p__Firmicutes|c__Bacilli|o__Lactobacillales|f__Streptococcaceae|g__Streptococcus|s__Streptococcus_thermophilus|t__SGB8002	0.0116068	3	3_1	Bacteria	Firmicutes	Bacilli	Lactobacillales	Streptococcaceae	Streptococcus	thermophilus	Group_3
s_9002000001226278LL_28.strict	94.05	0.29	50	1534219	23238	kSGB_8002	Species	k__Bacteria|p__Firmicutes|c__Bacilli|o__Lactobacillales|f__Streptococcaceae|g__Streptococcus|s__Streptococcus_thermophilus|t__SGB8002	0.0108876	3	3_1	Bacteria	Firmicutes	Bacilli	Lactobacillales	Streptococcaceae	Streptococcus	thermophilus	Group_3
s_9002000001226394_13.strict	96.64	0.15	0	1590976	43330	kSGB_8002	Species	k__Bacteria|p__Firmicutes|c__Bacilli|o__Lactobacillales|f__Streptococcaceae|g__Streptococcus|s__Streptococcus_thermophilus|t__SGB8002	0.0101587	3	3_1	Bacteria	Firmicutes	Bacilli	Lactobacillales	Streptococcaceae	Streptococcus	thermophilus	Group_3
s_9002000001226607_6.permissive	98.42	0.15	0	1596339	31322	kSGB_8002	Species	k__Bacteria|p__Firmicutes|c__Bacilli|o__Lactobacillales|f__Streptococcaceae|g__Streptococcus|s__Streptococcus_thermophilus|t__SGB8002	0.0121255	3	3_1	Bacteria	Firmicutes	Bacilli	Lactobacillales	Streptococcaceae	Streptococcus	thermophilus	Group_3
s_9002000001250148_2.orig	97.97	0.15	0	1601308	40169	kSGB_8002	Species	k__Bacteria|p__Firmicutes|c__Bacilli|o__Lactobacillales|f__Streptococcaceae|g__Streptococcus|s__Streptococcus_thermophilus|t__SGB8002	0.0100307	3	3_1	Bacteria	Firmicutes	Bacilli	Lactobacillales	Streptococcaceae	Streptococcus	thermophilus	Group_3
s_9002000001278828_31.permissive	91.89	0.15	0	1432959	29645	kSGB_8002	Species	k__Bacteria|p__Firmicutes|c__Bacilli|o__Lactobacillales|f__Streptococcaceae|g__Streptococcus|s__Streptococcus_thermophilus|t__SGB8002	0.0147891	3	3_1	Bacteria	Firmicutes	Bacilli	Lactobacillales	Streptococcaceae	Streptococcus	thermophilus	Group_3
s_9002000001282052_1.strict	97.85	0.15	0	1632452	44872	kSGB_8002	Species	k__Bacteria|p__Firmicutes|c__Bacilli|o__Lactobacillales|f__Streptococcaceae|g__Streptococcus|s__Streptococcus_thermophilus|t__SGB8002	0.0102257	3	3_1	Bacteria	Firmicutes	Bacilli	Lactobacillales	Streptococcaceae	Streptococcus	thermophilus	Group_3
s_9002000001288940_29.strict	99.16	0.15	0	1706946	53049	kSGB_8002	Species	k__Bacteria|p__Firmicutes|c__Bacilli|o__Lactobacillales|f__Streptococcaceae|g__Streptococcus|s__Streptococcus_thermophilus|t__SGB8002	0.0104053	3	3_1	Bacteria	Firmicutes	Bacilli	Lactobacillales	Streptococcaceae	Streptococcus	thermophilus	Group_3
s_9002000001301926_17.orig	93.95	0.15	0	1563935	14758	kSGB_8002	Species	k__Bacteria|p__Firmicutes|c__Bacilli|o__Lactobacillales|f__Streptococcaceae|g__Streptococcus|s__Streptococcus_thermophilus|t__SGB8002	0.011271	3	3_1	Bacteria	Firmicutes	Bacilli	Lactobacillales	Streptococcaceae	Streptococcus	thermophilus	Group_3
s_9002000001304042_52.strict	94.52	0.15	0	1643205	75931	kSGB_8002	Species	k__Bacteria|p__Firmicutes|c__Bacilli|o__Lactobacillales|f__Streptococcaceae|g__Streptococcus|s__Streptococcus_thermophilus|t__SGB8002	0.0135674	3	3_1	Bacteria	Firmicutes	Bacilli	Lactobacillales	Streptococcaceae	Streptococcus	thermophilus	Group_3
s_9002000001340924_23.strict	95.74	4.11	80	1621183	28342	kSGB_8002	Species	k__Bacteria|p__Firmicutes|c__Bacilli|o__Lactobacillales|f__Streptococcaceae|g__Streptococcus|s__Streptococcus_thermophilus|t__SGB8002	0.0116145	3	3_1	Bacteria	Firmicutes	Bacilli	Lactobacillales	Streptococcaceae	Streptococcus	thermophilus	Group_3
s_9002000001341467_11.strict	91.94	0.36	0	1512038	33825	kSGB_8002	Species	k__Bacteria|p__Firmicutes|c__Bacilli|o__Lactobacillales|f__Streptococcaceae|g__Streptococcus|s__Streptococcus_thermophilus|t__SGB8002	0.0113191	3	3_1	Bacteria	Firmicutes	Bacilli	Lactobacillales	Streptococcaceae	Streptococcus	thermophilus	Group_3
s_9002000001366180_2.strict	96.73	0.58	50	1532426	21591	kSGB_8002	Species	k__Bacteria|p__Firmicutes|c__Bacilli|o__Lactobacillales|f__Streptococcaceae|g__Streptococcus|s__Streptococcus_thermophilus|t__SGB8002	0.010295	3	3_1	Bacteria	Firmicutes	Bacilli	Lactobacillales	Streptococcaceae	Streptococcus	thermophilus	Group_3
s_9002000001374735_7.strict	94.43	0.58	50	1544893	14309	kSGB_8002	Species	k__Bacteria|p__Firmicutes|c__Bacilli|o__Lactobacillales|f__Streptococcaceae|g__Streptococcus|s__Streptococcus_thermophilus|t__SGB8002	0.0109197	3	3_1	Bacteria	Firmicutes	Bacilli	Lactobacillales	Streptococcaceae	Streptococcus	thermophilus	Group_3
s_9002000001379150_16.orig	91.4	0.23	50	1454383	13711	kSGB_8002	Species	k__Bacteria|p__Firmicutes|c__Bacilli|o__Lactobacillales|f__Streptococcaceae|g__Streptococcus|s__Streptococcus_thermophilus|t__SGB8002	0.0106499	3	3_1	Bacteria	Firmicutes	Bacilli	Lactobacillales	Streptococcaceae	Streptococcus	thermophilus	Group_3
s_9002000001386478_13.permissive	94.54	0.29	50	1467141	11107	kSGB_8002	Species	k__Bacteria|p__Firmicutes|c__Bacilli|o__Lactobacillales|f__Streptococcaceae|g__Streptococcus|s__Streptococcus_thermophilus|t__SGB8002	0.011578	3	3_1	Bacteria	Firmicutes	Bacilli	Lactobacillales	Streptococcaceae	Streptococcus	thermophilus	Group_3
s_9002000001387200_18.strict	98.58	0.58	50	1641960	42737	kSGB_8002	Species	k__Bacteria|p__Firmicutes|c__Bacilli|o__Lactobacillales|f__Streptococcaceae|g__Streptococcus|s__Streptococcus_thermophilus|t__SGB8002	0.00987464	3	3_1	Bacteria	Firmicutes	Bacilli	Lactobacillales	Streptococcaceae	Streptococcus	thermophilus	Group_3
s_9002000001390280_36.strict	96.75	0.22	0	1575075	31305	kSGB_8002	Species	k__Bacteria|p__Firmicutes|c__Bacilli|o__Lactobacillales|f__Streptococcaceae|g__Streptococcus|s__Streptococcus_thermophilus|t__SGB8002	0.01013	3	3_1	Bacteria	Firmicutes	Bacilli	Lactobacillales	Streptococcaceae	Streptococcus	thermophilus	Group_3
s_9002000001393561_22.strict	91.44	0.18	0	1397420	15583	kSGB_8002	Species	k__Bacteria|p__Firmicutes|c__Bacilli|o__Lactobacillales|f__Streptococcaceae|g__Streptococcus|s__Streptococcus_thermophilus|t__SGB8002	0.0120013	3	3_1	Bacteria	Firmicutes	Bacilli	Lactobacillales	Streptococcaceae	Streptococcus	thermophilus	Group_3
s_9002000001394602_18.strict	95.38	0.15	0	1648609	53987	kSGB_8002	Species	k__Bacteria|p__Firmicutes|c__Bacilli|o__Lactobacillales|f__Streptococcaceae|g__Streptococcus|s__Streptococcus_thermophilus|t__SGB8002	0.0112486	3	3_1	Bacteria	Firmicutes	Bacilli	Lactobacillales	Streptococcaceae	Streptococcus	thermophilus	Group_3
s_9002000001403309_16.permissive	91.34	0.73	75	1535430	15878	kSGB_8002	Species	k__Bacteria|p__Firmicutes|c__Bacilli|o__Lactobacillales|f__Streptococcaceae|g__Streptococcus|s__Streptococcus_thermophilus|t__SGB8002	0.0117438	3	3_1	Bacteria	Firmicutes	Bacilli	Lactobacillales	Streptococcaceae	Streptococcus	thermophilus	Group_3
s_9002000001406680_41.permissive	95.67	0.15	0	1609281	66408	kSGB_8003	Species	k__Bacteria|p__Firmicutes|c__Bacilli|o__Lactobacillales|f__Streptococcaceae|g__Streptococcus|s__Streptococcus_vestibularis|t__SGB8003	0.0716695	3	3_1	Bacteria	Firmicutes	Bacilli	Lactobacillales	Streptococcaceae	Streptococcus	thermophilus	Group_3
s_9002000001446502_2.permissive	90.82	0.22	100	1524695	20430	kSGB_8002	Species	k__Bacteria|p__Firmicutes|c__Bacilli|o__Lactobacillales|f__Streptococcaceae|g__Streptococcus|s__Streptococcus_thermophilus|t__SGB8002	0.0123213	3	3_1	Bacteria	Firmicutes	Bacilli	Lactobacillales	Streptococcaceae	Streptococcus	thermophilus	Group_3
s_9002000001446520_16.strict	99.13	0.2	50	1632418	32587	kSGB_8002	Species	k__Bacteria|p__Firmicutes|c__Bacilli|o__Lactobacillales|f__Streptococcaceae|g__Streptococcus|s__Streptococcus_thermophilus|t__SGB8002	0.00997015	3	3_1	Bacteria	Firmicutes	Bacilli	Lactobacillales	Streptococcaceae	Streptococcus	thermophilus	Group_3
s_9002000001450040_5.orig	96.09	0.22	50	1537099	15043	kSGB_8002	Species	k__Bacteria|p__Firmicutes|c__Bacilli|o__Lactobacillales|f__Streptococcaceae|g__Streptococcus|s__Streptococcus_thermophilus|t__SGB8002	0.0115298	3	3_1	Bacteria	Firmicutes	Bacilli	Lactobacillales	Streptococcaceae	Streptococcus	thermophilus	Group_3
s_9002000001452653_23.strict	90.2	0.35	25	1456443	11926	kSGB_8002	Species	k__Bacteria|p__Firmicutes|c__Bacilli|o__Lactobacillales|f__Streptococcaceae|g__Streptococcus|s__Streptococcus_thermophilus|t__SGB8002	0.0115708	3	3_1	Bacteria	Firmicutes	Bacilli	Lactobacillales	Streptococcaceae	Streptococcus	thermophilus	Group_3
s_9002000001456330_18.permissive	98.06	0.15	0	1686820	73060	kSGB_8002	Species	k__Bacteria|p__Firmicutes|c__Bacilli|o__Lactobacillales|f__Streptococcaceae|g__Streptococcus|s__Streptococcus_thermophilus|t__SGB8002	0.0103973	3	3_1	Bacteria	Firmicutes	Bacilli	Lactobacillales	Streptococcaceae	Streptococcus	thermophilus	Group_3
s_9002000001476931_7.orig	96.91	0.15	0	1613235	23371	kSGB_8002	Species	k__Bacteria|p__Firmicutes|c__Bacilli|o__Lactobacillales|f__Streptococcaceae|g__Streptococcus|s__Streptococcus_thermophilus|t__SGB8002	0.010016	3	3_1	Bacteria	Firmicutes	Bacilli	Lactobacillales	Streptococcaceae	Streptococcus	thermophilus	Group_3
s_9002000001480326_16.permissive	97.38	0.11	0	1670938	40670	kSGB_8002	Species	k__Bacteria|p__Firmicutes|c__Bacilli|o__Lactobacillales|f__Streptococcaceae|g__Streptococcus|s__Streptococcus_thermophilus|t__SGB8002	0.0107458	3	3_1	Bacteria	Firmicutes	Bacilli	Lactobacillales	Streptococcaceae	Streptococcus	thermophilus	Group_3
s_9002000001494617_27.permissive	97.09	0.15	0	1639117	43217	kSGB_8002	Species	k__Bacteria|p__Firmicutes|c__Bacilli|o__Lactobacillales|f__Streptococcaceae|g__Streptococcus|s__Streptococcus_thermophilus|t__SGB8002	0.0121228	3	3_1	Bacteria	Firmicutes	Bacilli	Lactobacillales	Streptococcaceae	Streptococcus	thermophilus	Group_3
s_9002000001495848_4.strict	96.88	0.16	0	1559802	19818	kSGB_8002	Species	k__Bacteria|p__Firmicutes|c__Bacilli|o__Lactobacillales|f__Streptococcaceae|g__Streptococcus|s__Streptococcus_thermophilus|t__SGB8002	0.0115907	3	3_1	Bacteria	Firmicutes	Bacilli	Lactobacillales	Streptococcaceae	Streptococcus	thermophilus	Group_3
s_9002000001504221_18.permissive	93.66	0.69	33.33	1503586	18744	kSGB_8002	Species	k__Bacteria|p__Firmicutes|c__Bacilli|o__Lactobacillales|f__Streptococcaceae|g__Streptococcus|s__Streptococcus_thermophilus|t__SGB8002	0.0107021	3	3_1	Bacteria	Firmicutes	Bacilli	Lactobacillales	Streptococcaceae	Streptococcus	thermophilus	Group_3
s_9002000001514308_24.permissive	95.44	0.15	0	1511478	31779	kSGB_8002	Species	k__Bacteria|p__Firmicutes|c__Bacilli|o__Lactobacillales|f__Streptococcaceae|g__Streptococcus|s__Streptococcus_thermophilus|t__SGB8002	0.0103121	3	3_1	Bacteria	Firmicutes	Bacilli	Lactobacillales	Streptococcaceae	Streptococcus	thermophilus	Group_3
s_9002000001531363_30.strict	95.67	2.05	64.71	1608494	37427	kSGB_8002	Species	k__Bacteria|p__Firmicutes|c__Bacilli|o__Lactobacillales|f__Streptococcaceae|g__Streptococcus|s__Streptococcus_thermophilus|t__SGB8002	0.0130846	3	3_1	Bacteria	Firmicutes	Bacilli	Lactobacillales	Streptococcaceae	Streptococcus	thermophilus	Group_3
s_9002000001554377_32.orig	92.91	0.2	0	1407581	10298	kSGB_8002	Species	k__Bacteria|p__Firmicutes|c__Bacilli|o__Lactobacillales|f__Streptococcaceae|g__Streptococcus|s__Streptococcus_thermophilus|t__SGB8002	0.0126413	3	3_1	Bacteria	Firmicutes	Bacilli	Lactobacillales	Streptococcaceae	Streptococcus	thermophilus	Group_3
s_9002000001554439_7.strict	97.68	0.15	0	1581502	40238	kSGB_8002	Species	k__Bacteria|p__Firmicutes|c__Bacilli|o__Lactobacillales|f__Streptococcaceae|g__Streptococcus|s__Streptococcus_thermophilus|t__SGB8002	0.00961885	3	3_1	Bacteria	Firmicutes	Bacilli	Lactobacillales	Streptococcaceae	Streptococcus	thermophilus	Group_3
s_9005000001577950_54.orig	94.24	0.15	0	1540767	23766	kSGB_8002	Species	k__Bacteria|p__Firmicutes|c__Bacilli|o__Lactobacillales|f__Streptococcaceae|g__Streptococcus|s__Streptococcus_thermophilus|t__SGB8002	0.0101935	3	3_1	Bacteria	Firmicutes	Bacilli	Lactobacillales	Streptococcaceae	Streptococcus	thermophilus	Group_3
s_9002000001301926_16.strict	97.97	0.24	0	1986390	70329	kSGB_8076	Species	k__Bacteria|p__Firmicutes|c__Bacilli|o__Lactobacillales|f__Streptococcaceae|g__Streptococcus|s__Streptococcus_parasanguinis|t__SGB8076	0.0453841	4	4_0	Bacteria	Firmicutes	Bacilli	Lactobacillales	Streptococcaceae	Streptococcus	parasanguinis_B	Group_4
s_9002000001250148_3.strict	97.6	0.19	0	2119687	12192	kSGB_7984	Species	k__Bacteria|p__Firmicutes|c__Bacilli|o__Lactobacillales|f__Streptococcaceae|g__Lactococcus|s__Lactococcus_lactis|t__SGB7984	0.100462	5	5_0	Bacteria	Firmicutes	Bacilli	Lactobacillales	Streptococcaceae	Lactococcus	lactis	Group_5
s_9002000001228076LL_34.permissive	93.04	0.63	0	2025319	47803	uSGB_5805	Family	k__Bacteria|p__Firmicutes|c__Negativicutes|o__Veillonellales|f__Veillonellaceae|g__GGB4266|s__GGB4266_SGB5805|t__SGB5805	0.0155804	6	6_3	Bacteria	Firmicutes_C	Negativicutes	Veillonellales	Dialisteraceae	Dialister	sp900543165	Group_6
s_9002000001267207_29.permissive	98.1	0.63	0	2134297	35120	uSGB_5805	Family	k__Bacteria|p__Firmicutes|c__Negativicutes|o__Veillonellales|f__Veillonellaceae|g__GGB4266|s__GGB4266_SGB5805|t__SGB5805	0.01428	6	6_1	Bacteria	Firmicutes_C	Negativicutes	Veillonellales	Dialisteraceae	Dialister	sp900543165	Group_6
s_9002000001572713_25.permissive	91.61	0.63	0	2026923	28120	uSGB_5805	Family	k__Bacteria|p__Firmicutes|c__Negativicutes|o__Veillonellales|f__Veillonellaceae|g__GGB4266|s__GGB4266_SGB5805|t__SGB5805	0.016007	6	6_2	Bacteria	Firmicutes_C	Negativicutes	Veillonellales	Dialisteraceae	Dialister	sp900543165	Group_6
s_9002000001462284_18.strict	95.25	0.63	0	1965996	16854	uSGB_5809	Family	k__Bacteria|p__Firmicutes|c__Negativicutes|o__Veillonellales|f__Veillonellaceae|g__GGB4266|s__GGB4266_SGB5809|t__SGB5809	0.0351291	7	7_1	Bacteria	Firmicutes_C	Negativicutes	Veillonellales	Dialisteraceae	Dialister	sp000434475	Group_7
s_9002000001473840_3.orig	95.06	1.27	50	1927696	10894	uSGB_5809	Family	k__Bacteria|p__Firmicutes|c__Negativicutes|o__Veillonellales|f__Veillonellaceae|g__GGB4266|s__GGB4266_SGB5809|t__SGB5809	0.0351182	7	7_3	Bacteria	Firmicutes_C	Negativicutes	Veillonellales	Dialisteraceae	Dialister	sp000434475	Group_7
s_9002000001476065_7.strict	98.1	0.63	0	1978422	16329	uSGB_5809	Family	k__Bacteria|p__Firmicutes|c__Negativicutes|o__Veillonellales|f__Veillonellaceae|g__GGB4266|s__GGB4266_SGB5809|t__SGB5809	0.0352713	7	7_4	Bacteria	Firmicutes_C	Negativicutes	Veillonellales	Dialisteraceae	Dialister	sp000434475	Group_7
s_9002000001495848_10.strict	98.73	0.63	0	2197439	18809	uSGB_5809	Family	k__Bacteria|p__Firmicutes|c__Negativicutes|o__Veillonellales|f__Veillonellaceae|g__GGB4266|s__GGB4266_SGB5809|t__SGB5809	0.0353514	7	7_2	Bacteria	Firmicutes_C	Negativicutes	Veillonellales	Dialisteraceae	Dialister	sp000434475	Group_7
s_9002000001393098_31.permissive	97.1	0.79	50	1930954	7739	kSGB_5818	Species	k__Bacteria|p__Firmicutes|c__Negativicutes|o__Veillonellales|f__Veillonellaceae|g__Dialister|s__Dialister_succinatiphilus|t__SGB5818	0.0302173	8	8_0	Bacteria	Firmicutes_C	Negativicutes	Veillonellales	Dialisteraceae	Dialister	succinatiphilus	Group_8
s_9002000001234064_4.permissive	96.26	1.7	33.33	2899798	30417	kSGB_9228	Species	k__Bacteria|p__Verrucomicrobia|c__Verrucomicrobiae|o__Verrucomicrobiales|f__Akkermansiaceae|g__Akkermansia|s__Akkermansia_muciniphila|t__SGB9228	0.0101806	9	9_3	Bacteria	Verrucomicrobiota	Verrucomicrobiae	Verrucomicrobiales	Akkermansiaceae	Akkermansia	muciniphila_B	Group_9
s_9002000001288940_1.permissive	97.96	0.34	0	2917165	49289	kSGB_9228	Species	k__Bacteria|p__Verrucomicrobia|c__Verrucomicrobiae|o__Verrucomicrobiales|f__Akkermansiaceae|g__Akkermansia|s__Akkermansia_muciniphila|t__SGB9228	0.0144796	9	9_4	Bacteria	Verrucomicrobiota	Verrucomicrobiae	Verrucomicrobiales	Akkermansiaceae	Akkermansia	muciniphila_B	Group_9
s_9002000001343701_14.strict	91.01	1.02	0	2658319	14249	kSGB_9228	Species	k__Bacteria|p__Verrucomicrobia|c__Verrucomicrobiae|o__Verrucomicrobiales|f__Akkermansiaceae|g__Akkermansia|s__Akkermansia_muciniphila|t__SGB9228	0.0140512	9	9_2	Bacteria	Verrucomicrobiota	Verrucomicrobiae	Verrucomicrobiales	Akkermansiaceae	Akkermansia	muciniphila_B	Group_9
s_9002000001346051_1.permissive	96.6	1.02	0	2988925	53800	kSGB_9228	Species	k__Bacteria|p__Verrucomicrobia|c__Verrucomicrobiae|o__Verrucomicrobiales|f__Akkermansiaceae|g__Akkermansia|s__Akkermansia_muciniphila|t__SGB9228	0.0135632	9	9_1	Bacteria	Verrucomicrobiota	Verrucomicrobiae	Verrucomicrobiales	Akkermansiaceae	Akkermansia	muciniphila_B	Group_9
s_9002000001380900_25.strict	97.96	0.68	0	3117480	143721	kSGB_9228	Species	k__Bacteria|p__Verrucomicrobia|c__Verrucomicrobiae|o__Verrucomicrobiales|f__Akkermansiaceae|g__Akkermansia|s__Akkermansia_muciniphila|t__SGB9228	0.0104943	9	9_3	Bacteria	Verrucomicrobiota	Verrucomicrobiae	Verrucomicrobiales	Akkermansiaceae	Akkermansia	muciniphila_B	Group_9
s_9002000001455931_23.permissive	97.96	0.68	0	3021209	63798	kSGB_9228	Species	k__Bacteria|p__Verrucomicrobia|c__Verrucomicrobiae|o__Verrucomicrobiales|f__Akkermansiaceae|g__Akkermansia|s__Akkermansia_muciniphila|t__SGB9228	0.0123278	9	9_2	Bacteria	Verrucomicrobiota	Verrucomicrobiae	Verrucomicrobiales	Akkermansiaceae	Akkermansia	muciniphila_B	Group_9
s_9002000001462284_38.strict	97.96	0.68	0	3088296	77811	kSGB_9228	Species	k__Bacteria|p__Verrucomicrobia|c__Verrucomicrobiae|o__Verrucomicrobiales|f__Akkermansiaceae|g__Akkermansia|s__Akkermansia_muciniphila|t__SGB9228	0.0128116	9	9_2	Bacteria	Verrucomicrobiota	Verrucomicrobiae	Verrucomicrobiales	Akkermansiaceae	Akkermansia	muciniphila_B	Group_9
s_9002000001480184LL_18.permissive	91.84	1.02	50	2627182	10003	kSGB_9228	Species	k__Bacteria|p__Verrucomicrobia|c__Verrucomicrobiae|o__Verrucomicrobiales|f__Akkermansiaceae|g__Akkermansia|s__Akkermansia_muciniphila|t__SGB9228	0.0145383	9	9_1	Bacteria	Verrucomicrobiota	Verrucomicrobiae	Verrucomicrobiales	Akkermansiaceae	Akkermansia	muciniphila_B	Group_9
s_9002000001537510_31.permissive	97.96	0.68	0	3107525	38854	kSGB_9228	Species	k__Bacteria|p__Verrucomicrobia|c__Verrucomicrobiae|o__Verrucomicrobiales|f__Akkermansiaceae|g__Akkermansia|s__Akkermansia_muciniphila|t__SGB9228	0.0109472	9	9_3	Bacteria	Verrucomicrobiota	Verrucomicrobiae	Verrucomicrobiales	Akkermansiaceae	Akkermansia	muciniphila_B	Group_9
s_2009000001576810_11.permissive	97.28	0	0	2676569	38088	kSGB_9226	Species	k__Bacteria|p__Verrucomicrobia|c__Verrucomicrobiae|o__Verrucomicrobiales|f__Akkermansiaceae|g__Akkermansia|s__Akkermansia_muciniphila|t__SGB9226	0.0187857	10	10_15	Bacteria	Verrucomicrobiota	Verrucomicrobiae	Verrucomicrobiales	Akkermansiaceae	Akkermansia	muciniphila	Group_10
s_9002000001169770_24.strict	97.28	0.68	100	2583232	84630	kSGB_9226	Species	k__Bacteria|p__Verrucomicrobia|c__Verrucomicrobiae|o__Verrucomicrobiales|f__Akkermansiaceae|g__Akkermansia|s__Akkermansia_muciniphila|t__SGB9226	0.0227198	10	10_5	Bacteria	Verrucomicrobiota	Verrucomicrobiae	Verrucomicrobiales	Akkermansiaceae	Akkermansia	muciniphila	Group_10
s_9002000001200638_34.permissive	97.96	0	0	2674679	143911	kSGB_9226	Species	k__Bacteria|p__Verrucomicrobia|c__Verrucomicrobiae|o__Verrucomicrobiales|f__Akkermansiaceae|g__Akkermansia|s__Akkermansia_muciniphila|t__SGB9226	0.0199826	10	10_19	Bacteria	Verrucomicrobiota	Verrucomicrobiae	Verrucomicrobiales	Akkermansiaceae	Akkermansia	muciniphila	Group_10
s_9002000001203943_32.permissive	96.23	0.68	0	2507012	21914	kSGB_9226	Species	k__Bacteria|p__Verrucomicrobia|c__Verrucomicrobiae|o__Verrucomicrobiales|f__Akkermansiaceae|g__Akkermansia|s__Akkermansia_muciniphila|t__SGB9226	0.0200001	10	10_19	Bacteria	Verrucomicrobiota	Verrucomicrobiae	Verrucomicrobiales	Akkermansiaceae	Akkermansia	muciniphila	Group_10
s_9002000001215917_18.orig	95.92	0	0	2756265	119270	kSGB_9226	Species	k__Bacteria|p__Verrucomicrobia|c__Verrucomicrobiae|o__Verrucomicrobiales|f__Akkermansiaceae|g__Akkermansia|s__Akkermansia_muciniphila|t__SGB9226	0.0192308	10	10_15	Bacteria	Verrucomicrobiota	Verrucomicrobiae	Verrucomicrobiales	Akkermansiaceae	Akkermansia	muciniphila	Group_10
s_9002000001225833_29.orig	96.26	0.68	100	2575998	40237	kSGB_9226	Species	k__Bacteria|p__Verrucomicrobia|c__Verrucomicrobiae|o__Verrucomicrobiales|f__Akkermansiaceae|g__Akkermansia|s__Akkermansia_muciniphila|t__SGB9226	0.0195783	10	10_19	Bacteria	Verrucomicrobiota	Verrucomicrobiae	Verrucomicrobiales	Akkermansiaceae	Akkermansia	muciniphila	Group_10
s_9002000001226394_25.permissive	95.07	0.34	100	2582427	21170	kSGB_9226	Species	k__Bacteria|p__Verrucomicrobia|c__Verrucomicrobiae|o__Verrucomicrobiales|f__Akkermansiaceae|g__Akkermansia|s__Akkermansia_muciniphila|t__SGB9226	0.0196694	10	10_18	Bacteria	Verrucomicrobiota	Verrucomicrobiae	Verrucomicrobiales	Akkermansiaceae	Akkermansia	muciniphila	Group_10
s_9002000001230056_30.orig	96.6	0	0	2651786	38080	kSGB_9226	Species	k__Bacteria|p__Verrucomicrobia|c__Verrucomicrobiae|o__Verrucomicrobiales|f__Akkermansiaceae|g__Akkermansia|s__Akkermansia_muciniphila|t__SGB9226	0.0194012	10	10_15	Bacteria	Verrucomicrobiota	Verrucomicrobiae	Verrucomicrobiales	Akkermansiaceae	Akkermansia	muciniphila	Group_10
s_9002000001233352_35.strict	96.43	0	0	2754596	98963	kSGB_9226	Species	k__Bacteria|p__Verrucomicrobia|c__Verrucomicrobiae|o__Verrucomicrobiales|f__Akkermansiaceae|g__Akkermansia|s__Akkermansia_muciniphila|t__SGB9226	0.0193935	10	10_15	Bacteria	Verrucomicrobiota	Verrucomicrobiae	Verrucomicrobiales	Akkermansiaceae	Akkermansia	muciniphila	Group_10
s_9002000001244042_4.permissive	93.53	0.68	0	2499252	15366	kSGB_9226	Species	k__Bacteria|p__Verrucomicrobia|c__Verrucomicrobiae|o__Verrucomicrobiales|f__Akkermansiaceae|g__Akkermansia|s__Akkermansia_muciniphila|t__SGB9226	0.0217826	10	10_1	Bacteria	Verrucomicrobiota	Verrucomicrobiae	Verrucomicrobiales	Akkermansiaceae	Akkermansia	muciniphila	Group_10
s_9002000001247124_20.strict	96.43	0	0	2698331	96758	kSGB_9226	Species	k__Bacteria|p__Verrucomicrobia|c__Verrucomicrobiae|o__Verrucomicrobiales|f__Akkermansiaceae|g__Akkermansia|s__Akkermansia_muciniphila|t__SGB9226	0.019796	10	10_18	Bacteria	Verrucomicrobiota	Verrucomicrobiae	Verrucomicrobiales	Akkermansiaceae	Akkermansia	muciniphila	Group_10
s_9002000001250513_4.strict	91.67	0	0	2641616	73655	kSGB_9226	Species	k__Bacteria|p__Verrucomicrobia|c__Verrucomicrobiae|o__Verrucomicrobiales|f__Akkermansiaceae|g__Akkermansia|s__Akkermansia_muciniphila|t__SGB9226	0.0213098	10	10_17	Bacteria	Verrucomicrobiota	Verrucomicrobiae	Verrucomicrobiales	Akkermansiaceae	Akkermansia	muciniphila	Group_10
s_9002000001267207_36.permissive	92.32	0.42	0	2369954	6673	kSGB_9226	Species	k__Bacteria|p__Verrucomicrobia|c__Verrucomicrobiae|o__Verrucomicrobiales|f__Akkermansiaceae|g__Akkermansia|s__Akkermansia_muciniphila|t__SGB9226	0.019942	10	10_14	Bacteria	Verrucomicrobiota	Verrucomicrobiae	Verrucomicrobiales	Akkermansiaceae	Akkermansia	muciniphila	Group_10
s_9002000001275760_23.permissive	96.94	0	0	2597177	21105	kSGB_9226	Species	k__Bacteria|p__Verrucomicrobia|c__Verrucomicrobiae|o__Verrucomicrobiales|f__Akkermansiaceae|g__Akkermansia|s__Akkermansia_muciniphila|t__SGB9226	0.0184789	10	10_14	Bacteria	Verrucomicrobiota	Verrucomicrobiae	Verrucomicrobiales	Akkermansiaceae	Akkermansia	muciniphila	Group_10
s_9002000001277188LL_6.permissive	97.28	0.68	0	2610583	44137	kSGB_9226	Species	k__Bacteria|p__Verrucomicrobia|c__Verrucomicrobiae|o__Verrucomicrobiales|f__Akkermansiaceae|g__Akkermansia|s__Akkermansia_muciniphila|t__SGB9226	0.019941	10	10_11	Bacteria	Verrucomicrobiota	Verrucomicrobiae	Verrucomicrobiales	Akkermansiaceae	Akkermansia	muciniphila	Group_10
s_9002000001277357_4.permissive	97.52	1.02	0	2543036	57270	kSGB_9226	Species	k__Bacteria|p__Verrucomicrobia|c__Verrucomicrobiae|o__Verrucomicrobiales|f__Akkermansiaceae|g__Akkermansia|s__Akkermansia_muciniphila|t__SGB9226	0.0204862	10	10_11	Bacteria	Verrucomicrobiota	Verrucomicrobiae	Verrucomicrobiales	Akkermansiaceae	Akkermansia	muciniphila	Group_10
s_9002000001278828_35.permissive	91.95	0	0	2532544	33237	kSGB_9226	Species	k__Bacteria|p__Verrucomicrobia|c__Verrucomicrobiae|o__Verrucomicrobiales|f__Akkermansiaceae|g__Akkermansia|s__Akkermansia_muciniphila|t__SGB9226	0.0203353	10	10_17	Bacteria	Verrucomicrobiota	Verrucomicrobiae	Verrucomicrobiales	Akkermansiaceae	Akkermansia	muciniphila	Group_10
s_9002000001285887_65.strict	95.92	0	0	2621406	62633	kSGB_9226	Species	k__Bacteria|p__Verrucomicrobia|c__Verrucomicrobiae|o__Verrucomicrobiales|f__Akkermansiaceae|g__Akkermansia|s__Akkermansia_muciniphila|t__SGB9226	0.0187581	10	10_15	Bacteria	Verrucomicrobiota	Verrucomicrobiae	Verrucomicrobiales	Akkermansiaceae	Akkermansia	muciniphila	Group_10
s_9002000001295079_43.permissive	97.28	0.68	0	2593981	84564	kSGB_9226	Species	k__Bacteria|p__Verrucomicrobia|c__Verrucomicrobiae|o__Verrucomicrobiales|f__Akkermansiaceae|g__Akkermansia|s__Akkermansia_muciniphila|t__SGB9226	0.0218968	10	10_2	Bacteria	Verrucomicrobiota	Verrucomicrobiae	Verrucomicrobiales	Akkermansiaceae	Akkermansia	muciniphila	Group_10
s_9002000001295785_35.strict	94.22	0.68	0	2567724	31150	kSGB_9226	Species	k__Bacteria|p__Verrucomicrobia|c__Verrucomicrobiae|o__Verrucomicrobiales|f__Akkermansiaceae|g__Akkermansia|s__Akkermansia_muciniphila|t__SGB9226	0.0201663	10	10_11	Bacteria	Verrucomicrobiota	Verrucomicrobiae	Verrucomicrobiales	Akkermansiaceae	Akkermansia	muciniphila	Group_10
s_9002000001316393_17.permissive	95.07	0	0	2604564	21651	kSGB_9226	Species	k__Bacteria|p__Verrucomicrobia|c__Verrucomicrobiae|o__Verrucomicrobiales|f__Akkermansiaceae|g__Akkermansia|s__Akkermansia_muciniphila|t__SGB9226	0.0197418	10	10_17	Bacteria	Verrucomicrobiota	Verrucomicrobiae	Verrucomicrobiales	Akkermansiaceae	Akkermansia	muciniphila	Group_10
s_9002000001323431_37.permissive	97.96	0	0	2673281	80214	kSGB_9226	Species	k__Bacteria|p__Verrucomicrobia|c__Verrucomicrobiae|o__Verrucomicrobiales|f__Akkermansiaceae|g__Akkermansia|s__Akkermansia_muciniphila|t__SGB9226	0.020125	10	10_21	Bacteria	Verrucomicrobiota	Verrucomicrobiae	Verrucomicrobiales	Akkermansiaceae	Akkermansia	muciniphila	Group_10
s_9002000001341879_9.permissive	95.1	1.7	33.33	2521245	18597	kSGB_9226	Species	k__Bacteria|p__Verrucomicrobia|c__Verrucomicrobiae|o__Verrucomicrobiales|f__Akkermansiaceae|g__Akkermansia|s__Akkermansia_muciniphila|t__SGB9226	0.0217376	10	10_22	Bacteria	Verrucomicrobiota	Verrucomicrobiae	Verrucomicrobiales	Akkermansiaceae	Akkermansia	muciniphila	Group_10
s_9002000001352282_4.permissive	97.28	0	0	2695238	44398	kSGB_9226	Species	k__Bacteria|p__Verrucomicrobia|c__Verrucomicrobiae|o__Verrucomicrobiales|f__Akkermansiaceae|g__Akkermansia|s__Akkermansia_muciniphila|t__SGB9226	0.019992	10	10_16	Bacteria	Verrucomicrobiota	Verrucomicrobiae	Verrucomicrobiales	Akkermansiaceae	Akkermansia	muciniphila	Group_10
s_9002000001367982_10.strict	96.94	0	0	2648087	48648	kSGB_9226	Species	k__Bacteria|p__Verrucomicrobia|c__Verrucomicrobiae|o__Verrucomicrobiales|f__Akkermansiaceae|g__Akkermansia|s__Akkermansia_muciniphila|t__SGB9226	0.0183873	10	10_15	Bacteria	Verrucomicrobiota	Verrucomicrobiae	Verrucomicrobiales	Akkermansiaceae	Akkermansia	muciniphila	Group_10
s_9002000001375110_8.strict	94.34	0	0	2529149	14624	kSGB_9226	Species	k__Bacteria|p__Verrucomicrobia|c__Verrucomicrobiae|o__Verrucomicrobiales|f__Akkermansiaceae|g__Akkermansia|s__Akkermansia_muciniphila|t__SGB9226	0.0208418	10	10_11	Bacteria	Verrucomicrobiota	Verrucomicrobiae	Verrucomicrobiales	Akkermansiaceae	Akkermansia	muciniphila	Group_10
s_9002000001392484_33.permissive	97.05	0	0	2651823	50714	kSGB_9226	Species	k__Bacteria|p__Verrucomicrobia|c__Verrucomicrobiae|o__Verrucomicrobiales|f__Akkermansiaceae|g__Akkermansia|s__Akkermansia_muciniphila|t__SGB9226	0.0221531	10	10_5	Bacteria	Verrucomicrobiota	Verrucomicrobiae	Verrucomicrobiales	Akkermansiaceae	Akkermansia	muciniphila	Group_10
s_9002000001392831_3.permissive	93.71	0.48	50	2526132	17941	kSGB_9226	Species	k__Bacteria|p__Verrucomicrobia|c__Verrucomicrobiae|o__Verrucomicrobiales|f__Akkermansiaceae|g__Akkermansia|s__Akkermansia_muciniphila|t__SGB9226	0.0190565	10	10_15	Bacteria	Verrucomicrobiota	Verrucomicrobiae	Verrucomicrobiales	Akkermansiaceae	Akkermansia	muciniphila	Group_10
s_9002000001394021_6.permissive	93.37	0.68	0	2593860	44545	kSGB_9226	Species	k__Bacteria|p__Verrucomicrobia|c__Verrucomicrobiae|o__Verrucomicrobiales|f__Akkermansiaceae|g__Akkermansia|s__Akkermansia_muciniphila|t__SGB9226	0.0222005	10	10_5	Bacteria	Verrucomicrobiota	Verrucomicrobiae	Verrucomicrobiales	Akkermansiaceae	Akkermansia	muciniphila	Group_10
s_9002000001395260_34.permissive	97.96	0	0	2799931	81502	kSGB_9226	Species	k__Bacteria|p__Verrucomicrobia|c__Verrucomicrobiae|o__Verrucomicrobiales|f__Akkermansiaceae|g__Akkermansia|s__Akkermansia_muciniphila|t__SGB9226	0.0189091	10	10_15	Bacteria	Verrucomicrobiota	Verrucomicrobiae	Verrucomicrobiales	Akkermansiaceae	Akkermansia	muciniphila	Group_10
s_9002000001398120_29.strict	92.68	0.68	0	2470698	18750	kSGB_9226	Species	k__Bacteria|p__Verrucomicrobia|c__Verrucomicrobiae|o__Verrucomicrobiales|f__Akkermansiaceae|g__Akkermansia|s__Akkermansia_muciniphila|t__SGB9226	0.0223785	10	10_10	Bacteria	Verrucomicrobiota	Verrucomicrobiae	Verrucomicrobiales	Akkermansiaceae	Akkermansia	muciniphila	Group_10
s_9002000001416675_42.strict	95.44	0.85	50	2611459	16970	kSGB_9226	Species	k__Bacteria|p__Verrucomicrobia|c__Verrucomicrobiae|o__Verrucomicrobiales|f__Akkermansiaceae|g__Akkermansia|s__Akkermansia_muciniphila|t__SGB9226	0.0192002	10	10_15	Bacteria	Verrucomicrobiota	Verrucomicrobiae	Verrucomicrobiales	Akkermansiaceae	Akkermansia	muciniphila	Group_10
s_9002000001420408_17.permissive	95.24	0.68	0	2632922	44575	kSGB_9226	Species	k__Bacteria|p__Verrucomicrobia|c__Verrucomicrobiae|o__Verrucomicrobiales|f__Akkermansiaceae|g__Akkermansia|s__Akkermansia_muciniphila|t__SGB9226	0.0207352	10	10_12	Bacteria	Verrucomicrobiota	Verrucomicrobiae	Verrucomicrobiales	Akkermansiaceae	Akkermansia	muciniphila	Group_10
s_9002000001423590_21.strict	94.44	0	0	2596359	31882	kSGB_9226	Species	k__Bacteria|p__Verrucomicrobia|c__Verrucomicrobiae|o__Verrucomicrobiales|f__Akkermansiaceae|g__Akkermansia|s__Akkermansia_muciniphila|t__SGB9226	0.0200453	10	10_17	Bacteria	Verrucomicrobiota	Verrucomicrobiae	Verrucomicrobiales	Akkermansiaceae	Akkermansia	muciniphila	Group_10
s_9002000001429200_20.strict	90.7	2.38	25	2308354	9940	kSGB_9226	Species	k__Bacteria|p__Verrucomicrobia|c__Verrucomicrobiae|o__Verrucomicrobiales|f__Akkermansiaceae|g__Akkermansia|s__Akkermansia_muciniphila|t__SGB9226	0.0206399	10	10_20	Bacteria	Verrucomicrobiota	Verrucomicrobiae	Verrucomicrobiales	Akkermansiaceae	Akkermansia	muciniphila	Group_10
s_9002000001435151_41.permissive	97.96	0.68	0	2727268	31346	kSGB_9226	Species	k__Bacteria|p__Verrucomicrobia|c__Verrucomicrobiae|o__Verrucomicrobiales|f__Akkermansiaceae|g__Akkermansia|s__Akkermansia_muciniphila|t__SGB9226	0.0230883	10	10_9	Bacteria	Verrucomicrobiota	Verrucomicrobiae	Verrucomicrobiales	Akkermansiaceae	Akkermansia	muciniphila	Group_10
s_9002000001438180_5.strict	97.96	0	0	2753627	55435	kSGB_9226	Species	k__Bacteria|p__Verrucomicrobia|c__Verrucomicrobiae|o__Verrucomicrobiales|f__Akkermansiaceae|g__Akkermansia|s__Akkermansia_muciniphila|t__SGB9226	0.0195187	10	10_15	Bacteria	Verrucomicrobiota	Verrucomicrobiae	Verrucomicrobiales	Akkermansiaceae	Akkermansia	muciniphila	Group_10
s_9002000001444393_4.permissive	97.96	1.4	33.33	2710990	34313	kSGB_9226	Species	k__Bacteria|p__Verrucomicrobia|c__Verrucomicrobiae|o__Verrucomicrobiales|f__Akkermansiaceae|g__Akkermansia|s__Akkermansia_muciniphila|t__SGB9226	0.0185281	10	10_15	Bacteria	Verrucomicrobiota	Verrucomicrobiae	Verrucomicrobiales	Akkermansiaceae	Akkermansia	muciniphila	Group_10
s_9002000001454080_16.strict	97.28	0	0	2700849	104307	kSGB_9226	Species	k__Bacteria|p__Verrucomicrobia|c__Verrucomicrobiae|o__Verrucomicrobiales|f__Akkermansiaceae|g__Akkermansia|s__Akkermansia_muciniphila|t__SGB9226	0.0224275	10	10_5	Bacteria	Verrucomicrobiota	Verrucomicrobiae	Verrucomicrobiales	Akkermansiaceae	Akkermansia	muciniphila	Group_10
s_9002000001470400_15.permissive	93.03	1.36	50	2532028	10128	kSGB_9226	Species	k__Bacteria|p__Verrucomicrobia|c__Verrucomicrobiae|o__Verrucomicrobiales|f__Akkermansiaceae|g__Akkermansia|s__Akkermansia_muciniphila|t__SGB9226	0.0190538	10	10_14	Bacteria	Verrucomicrobiota	Verrucomicrobiae	Verrucomicrobiales	Akkermansiaceae	Akkermansia	muciniphila	Group_10
s_9002000001475729LL_11.strict	97.96	0.68	0	2646989	37373	kSGB_9226	Species	k__Bacteria|p__Verrucomicrobia|c__Verrucomicrobiae|o__Verrucomicrobiales|f__Akkermansiaceae|g__Akkermansia|s__Akkermansia_muciniphila|t__SGB9226	0.0223098	10	10_8	Bacteria	Verrucomicrobiota	Verrucomicrobiae	Verrucomicrobiales	Akkermansiaceae	Akkermansia	muciniphila	Group_10
s_9002000001479951_32.orig	97.96	0.68	100	2601005	48403	kSGB_9226	Species	k__Bacteria|p__Verrucomicrobia|c__Verrucomicrobiae|o__Verrucomicrobiales|f__Akkermansiaceae|g__Akkermansia|s__Akkermansia_muciniphila|t__SGB9226	0.0218483	10	10_7	Bacteria	Verrucomicrobiota	Verrucomicrobiae	Verrucomicrobiales	Akkermansiaceae	Akkermansia	muciniphila	Group_10
s_9002000001482920_15.permissive	95.75	0	0	2676715	79358	kSGB_9226	Species	k__Bacteria|p__Verrucomicrobia|c__Verrucomicrobiae|o__Verrucomicrobiales|f__Akkermansiaceae|g__Akkermansia|s__Akkermansia_muciniphila|t__SGB9226	0.0201492	10	10_15	Bacteria	Verrucomicrobiota	Verrucomicrobiae	Verrucomicrobiales	Akkermansiaceae	Akkermansia	muciniphila	Group_10
s_9002000001494617_12.orig	97.28	0	0	2648704	100687	kSGB_9226	Species	k__Bacteria|p__Verrucomicrobia|c__Verrucomicrobiae|o__Verrucomicrobiales|f__Akkermansiaceae|g__Akkermansia|s__Akkermansia_muciniphila|t__SGB9226	0.0220259	10	10_13	Bacteria	Verrucomicrobiota	Verrucomicrobiae	Verrucomicrobiales	Akkermansiaceae	Akkermansia	muciniphila	Group_10
s_9002000001497216_48.permissive	97.96	0	0	2821172	83131	kSGB_9226	Species	k__Bacteria|p__Verrucomicrobia|c__Verrucomicrobiae|o__Verrucomicrobiales|f__Akkermansiaceae|g__Akkermansia|s__Akkermansia_muciniphila|t__SGB9226	0.020065	10	10_17	Bacteria	Verrucomicrobiota	Verrucomicrobiae	Verrucomicrobiales	Akkermansiaceae	Akkermansia	muciniphila	Group_10
s_9002000001501892_32.permissive	97.96	0.68	0	2641654	63794	kSGB_9226	Species	k__Bacteria|p__Verrucomicrobia|c__Verrucomicrobiae|o__Verrucomicrobiales|f__Akkermansiaceae|g__Akkermansia|s__Akkermansia_muciniphila|t__SGB9226	0.0199301	10	10_11	Bacteria	Verrucomicrobiota	Verrucomicrobiae	Verrucomicrobiales	Akkermansiaceae	Akkermansia	muciniphila	Group_10
s_9002000001531940_7.strict	93.17	2.04	0	2531269	14969	kSGB_9226	Species	k__Bacteria|p__Verrucomicrobia|c__Verrucomicrobiae|o__Verrucomicrobiales|f__Akkermansiaceae|g__Akkermansia|s__Akkermansia_muciniphila|t__SGB9226	0.0213719	10	10_11	Bacteria	Verrucomicrobiota	Verrucomicrobiae	Verrucomicrobiales	Akkermansiaceae	Akkermansia	muciniphila	Group_10
s_9002000001543510_12.permissive	97.96	0	0	2653758	110188	kSGB_9226	Species	k__Bacteria|p__Verrucomicrobia|c__Verrucomicrobiae|o__Verrucomicrobiales|f__Akkermansiaceae|g__Akkermansia|s__Akkermansia_muciniphila|t__SGB9226	0.0216936	10	10_3	Bacteria	Verrucomicrobiota	Verrucomicrobiae	Verrucomicrobiales	Akkermansiaceae	Akkermansia	muciniphila	Group_10
s_9002000001554377_11.strict	97.96	0	0	2684151	93225	kSGB_9226	Species	k__Bacteria|p__Verrucomicrobia|c__Verrucomicrobiae|o__Verrucomicrobiales|f__Akkermansiaceae|g__Akkermansia|s__Akkermansia_muciniphila|t__SGB9226	0.0224927	10	10_5	Bacteria	Verrucomicrobiota	Verrucomicrobiae	Verrucomicrobiales	Akkermansiaceae	Akkermansia	muciniphila	Group_10
s_9002000001566660_15.permissive	97.05	0	0	2715439	52691	kSGB_9226	Species	k__Bacteria|p__Verrucomicrobia|c__Verrucomicrobiae|o__Verrucomicrobiales|f__Akkermansiaceae|g__Akkermansia|s__Akkermansia_muciniphila|t__SGB9226	0.0196605	10	10_18	Bacteria	Verrucomicrobiota	Verrucomicrobiae	Verrucomicrobiales	Akkermansiaceae	Akkermansia	muciniphila	Group_10
s_9002000001572150_22.strict	97.96	0	0	2674649	86348	kSGB_9226	Species	k__Bacteria|p__Verrucomicrobia|c__Verrucomicrobiae|o__Verrucomicrobiales|f__Akkermansiaceae|g__Akkermansia|s__Akkermansia_muciniphila|t__SGB9226	0.0203139	10	10_11	Bacteria	Verrucomicrobiota	Verrucomicrobiae	Verrucomicrobiales	Akkermansiaceae	Akkermansia	muciniphila	Group_10
s_9002000001572920_6.orig	95.69	1.36	0	2529789	34859	kSGB_9226	Species	k__Bacteria|p__Verrucomicrobia|c__Verrucomicrobiae|o__Verrucomicrobiales|f__Akkermansiaceae|g__Akkermansia|s__Akkermansia_muciniphila|t__SGB9226	0.0221394	10	10_8	Bacteria	Verrucomicrobiota	Verrucomicrobiae	Verrucomicrobiales	Akkermansiaceae	Akkermansia	muciniphila	Group_10
s_9002000001577850_2.strict	95.24	0	0	2603991	36141	kSGB_9226	Species	k__Bacteria|p__Verrucomicrobia|c__Verrucomicrobiae|o__Verrucomicrobiales|f__Akkermansiaceae|g__Akkermansia|s__Akkermansia_muciniphila|t__SGB9226	0.0194332	10	10_18	Bacteria	Verrucomicrobiota	Verrucomicrobiae	Verrucomicrobiales	Akkermansiaceae	Akkermansia	muciniphila	Group_10
s_9002000001580090_21.permissive	97.72	1.36	0	2741437	45211	kSGB_9226	Species	k__Bacteria|p__Verrucomicrobia|c__Verrucomicrobiae|o__Verrucomicrobiales|f__Akkermansiaceae|g__Akkermansia|s__Akkermansia_muciniphila|t__SGB9226	0.020199	10	10_17	Bacteria	Verrucomicrobiota	Verrucomicrobiae	Verrucomicrobiales	Akkermansiaceae	Akkermansia	muciniphila	Group_10
s_9002000001582170_22.strict	96.6	0	0	2584913	88400	kSGB_9226	Species	k__Bacteria|p__Verrucomicrobia|c__Verrucomicrobiae|o__Verrucomicrobiales|f__Akkermansiaceae|g__Akkermansia|s__Akkermansia_muciniphila|t__SGB9226	0.0220108	10	10_6	Bacteria	Verrucomicrobiota	Verrucomicrobiae	Verrucomicrobiales	Akkermansiaceae	Akkermansia	muciniphila	Group_10
s_9002000001584779_15.orig	95.92	0.68	0	2621722	99300	kSGB_9226	Species	k__Bacteria|p__Verrucomicrobia|c__Verrucomicrobiae|o__Verrucomicrobiales|f__Akkermansiaceae|g__Akkermansia|s__Akkermansia_muciniphila|t__SGB9226	0.0216666	10	10_4	Bacteria	Verrucomicrobiota	Verrucomicrobiae	Verrucomicrobiales	Akkermansiaceae	Akkermansia	muciniphila	Group_10
s_9002000001588517_30.permissive	96.6	0	0	2739506	99934	kSGB_9226	Species	k__Bacteria|p__Verrucomicrobia|c__Verrucomicrobiae|o__Verrucomicrobiales|f__Akkermansiaceae|g__Akkermansia|s__Akkermansia_muciniphila|t__SGB9226	0.0197436	10	10_18	Bacteria	Verrucomicrobiota	Verrucomicrobiae	Verrucomicrobiales	Akkermansiaceae	Akkermansia	muciniphila	Group_10
s_9002000001187760_29.permissive	96.07	0.48	12.5	4029223	34818	kSGB_10068	Species	k__Bacteria|p__Proteobacteria|c__Gammaproteobacteria|o__Enterobacterales|f__Enterobacteriaceae|g__Escherichia|s__Escherichia_coli|t__SGB10068	0.0215986	11	11_3	Bacteria	Proteobacteria	Gammaproteobacteria	Enterobacterales	Enterobacteriaceae	Escherichia	coli	Group_11
s_9002000001226394_18.orig	93.75	1.46	46.67	4205957	11594	kSGB_10068	Species	k__Bacteria|p__Proteobacteria|c__Gammaproteobacteria|o__Enterobacterales|f__Enterobacteriaceae|g__Escherichia|s__Escherichia_coli|t__SGB10068	0.0294132	11	11_5	Bacteria	Proteobacteria	Gammaproteobacteria	Enterobacterales	Enterobacteriaceae	Escherichia	coli	Group_11
s_9002000001227800_4.permissive	93.12	0.09	50	4179668	170804	kSGB_10068	Species	k__Bacteria|p__Proteobacteria|c__Gammaproteobacteria|o__Enterobacterales|f__Enterobacteriaceae|g__Escherichia|s__Escherichia_coli|t__SGB10068	0.0313001	11	11_1	Bacteria	Proteobacteria	Gammaproteobacteria	Enterobacterales	Enterobacteriaceae	Escherichia	coli	Group_11
s_9002000001244042_7.strict	98.37	0.67	22.22	4413064	26909	kSGB_10068	Species	k__Bacteria|p__Proteobacteria|c__Gammaproteobacteria|o__Enterobacterales|f__Enterobacteriaceae|g__Escherichia|s__Escherichia_coli|t__SGB10068	0.0211584	11	11_2	Bacteria	Proteobacteria	Gammaproteobacteria	Enterobacterales	Enterobacteriaceae	Escherichia	coli	Group_11
s_9002000001277357_2.orig	95.55	0.62	42.86	4052369	21988	kSGB_10068	Species	k__Bacteria|p__Proteobacteria|c__Gammaproteobacteria|o__Enterobacterales|f__Enterobacteriaceae|g__Escherichia|s__Escherichia_coli|t__SGB10068	0.0221364	11	11_2	Bacteria	Proteobacteria	Gammaproteobacteria	Enterobacterales	Enterobacteriaceae	Escherichia	coli	Group_11
s_9002000001316393_15.permissive	99	0.39	0	4443248	35109	kSGB_10068	Species	k__Bacteria|p__Proteobacteria|c__Gammaproteobacteria|o__Enterobacterales|f__Enterobacteriaceae|g__Escherichia|s__Escherichia_coli|t__SGB10068	0.0293457	11	11_1	Bacteria	Proteobacteria	Gammaproteobacteria	Enterobacterales	Enterobacteriaceae	Escherichia	coli	Group_11
s_9002000001323502_16.strict	91.37	0.04	0	4336895	123167	kSGB_10068	Species	k__Bacteria|p__Proteobacteria|c__Gammaproteobacteria|o__Enterobacterales|f__Enterobacteriaceae|g__Escherichia|s__Escherichia_coli|t__SGB10068	0.0305314	11	11_6	Bacteria	Proteobacteria	Gammaproteobacteria	Enterobacterales	Enterobacteriaceae	Escherichia	coli	Group_11
s_9002000001367982_1.permissive	96.92	0.88	66.67	4264899	19810	kSGB_10068	Species	k__Bacteria|p__Proteobacteria|c__Gammaproteobacteria|o__Enterobacterales|f__Enterobacteriaceae|g__Escherichia|s__Escherichia_coli|t__SGB10068	0.021448	11	11_2	Bacteria	Proteobacteria	Gammaproteobacteria	Enterobacterales	Enterobacteriaceae	Escherichia	coli	Group_11
s_9002000001459770_1.permissive	99.07	0.04	0	4523833	71550	kSGB_10065	Species	k__Bacteria|p__Proteobacteria|c__Gammaproteobacteria|o__Enterobacterales|f__Enterobacteriaceae|g__Escherichia|s__Escherichia_coli|t__SGB10065	0.0655597	11	11_2	Bacteria	Proteobacteria	Gammaproteobacteria	Enterobacterales	Enterobacteriaceae	Escherichia	coli	Group_11
s_9002000001476931_15.permissive	92.57	0.68	23.08	3965446	10254	kSGB_10068	Species	k__Bacteria|p__Proteobacteria|c__Gammaproteobacteria|o__Enterobacterales|f__Enterobacteriaceae|g__Escherichia|s__Escherichia_coli|t__SGB10068	0.022369	11	11_4	Bacteria	Proteobacteria	Gammaproteobacteria	Enterobacterales	Enterobacteriaceae	Escherichia	coli	Group_11
s_9002000001384880_32.permissive	98.34	1.06	30	4651801	26772	kSGB_10083	Species	k__Bacteria|p__Proteobacteria|c__Gammaproteobacteria|o__Enterobacterales|f__Enterobacteriaceae|g__Citrobacter|s__Citrobacter_freundii|t__SGB10083	0.0162911	12	12_0	Bacteria	Proteobacteria	Gammaproteobacteria	Enterobacterales	Enterobacteriaceae	Citrobacter	freundii	Group_12
s_9002000001542350_14.strict	90.78	0.04	0	4711358	82398	kSGB_10115	Species	k__Bacteria|p__Proteobacteria|c__Gammaproteobacteria|o__Enterobacterales|f__Enterobacteriaceae|g__Klebsiella|s__Klebsiella_pneumoniae|t__SGB10115	0.0132045	13	13_0	Bacteria	Proteobacteria	Gammaproteobacteria	Enterobacterales	Enterobacteriaceae	Klebsiella	pneumoniae	Group_13
s_9002000001244042_39.strict	93.51	1.68	0	2550039	16197	uSGB_14874	Other	k__Bacteria|p__Firmicutes|c__CFGB3012|o__OFGB3012|f__FGB3012|g__GGB9479|s__GGB9479_SGB14874|t__SGB14874	0.00890335	14	14_1	Bacteria	Firmicutes_A	Clostridia	Oscillospirales	Acutalibacteraceae	Fimivicinus	sp900544375	Group_14
s_9002000001480326_9.strict	94.64	0.67	0	2717660	35942	uSGB_14874	Other	k__Bacteria|p__Firmicutes|c__CFGB3012|o__OFGB3012|f__FGB3012|g__GGB9479|s__GGB9479_SGB14874|t__SGB14874	0.00867083	14	14_1	Bacteria	Firmicutes_A	Clostridia	Oscillospirales	Acutalibacteraceae	Fimivicinus	sp900544375	Group_14
s_9002000001554377_23.orig	90.37	1.48	50	2476698	9072	uSGB_14874	Other	k__Bacteria|p__Firmicutes|c__CFGB3012|o__OFGB3012|f__FGB3012|g__GGB9479|s__GGB9479_SGB14874|t__SGB14874	0.00969723	14	14_1	Bacteria	Firmicutes_A	Clostridia	Oscillospirales	Acutalibacteraceae	Fimivicinus	sp900544375	Group_14
s_9002000001280218_13.permissive	91.57	0.56	0	1282673	48431	uSGB_6494	Other	k__Bacteria|p__Firmicutes|c__CFGB1777|o__OFGB1777|f__FGB1777|g__GGB4695|s__GGB4695_SGB6494|t__SGB6494	0.025094	15	15_0	Bacteria	Firmicutes	Bacilli	RF39	UBA660	CAG-1000	sp900768345	Group_15
s_9002000001410650_5.permissive	94.38	3.37	0	1262480	48592	uSGB_6484	Other	k__Bacteria|p__Firmicutes|c__CFGB1776|o__OFGB1776|f__FGB1776|g__GGB4687|s__GGB4687_SGB6484|t__SGB6484	0.0249262	16	16_0	Bacteria	Firmicutes	Bacilli	RF39	UBA660	CAG-914	sp000437895	Group_16
s_9002000001410650_4.strict	90.45	2.22	25	1800967	7236	uSGB_14313	Other	k__Bacteria|p__Firmicutes|c__CFGB2984|o__OFGB2984|f__FGB2984|g__GGB9347|s__GGB9347_SGB14313|t__SGB14313	0.0250341	17	17_3	Bacteria	Firmicutes_A	Clostridia	Christensenellales	CAG-138	Phil1	sp001940855	Group_17
s_9002000001479951_8.permissive	90.04	0	0	1777925	7020	uSGB_14313	Other	k__Bacteria|p__Firmicutes|c__CFGB2984|o__OFGB2984|f__FGB2984|g__GGB9347|s__GGB9347_SGB14313|t__SGB14313	0.0260493	17	17_1	Bacteria	Firmicutes_A	Clostridia	Christensenellales	CAG-138	Phil1	sp001940855	Group_17
s_9002000001582170_10.strict	95.56	0.43	50	1944820	13820	uSGB_14313	Other	k__Bacteria|p__Firmicutes|c__CFGB2984|o__OFGB2984|f__FGB2984|g__GGB9347|s__GGB9347_SGB14313|t__SGB14313	0.0260121	17	17_2	Bacteria	Firmicutes_A	Clostridia	Christensenellales	CAG-138	Phil1	sp001940855	Group_17
s_9002000001388285_22.permissive	94.57	1.01	50	2019426	11705	uSGB_15019	Family	k__Bacteria|p__Firmicutes|c__Clostridia|o__Clostridiales|f__Ruminococcaceae|g__GGB9595|s__GGB9595_SGB15019|t__SGB15019	0.0276307	18	18_0	Bacteria	Firmicutes_A	Clostridia	Oscillospirales	Oscillospiraceae	Faecousia	sp900540635	Group_18
s_9002000001589560_4.strict	96.09	0	0	2093925	13770	uSGB_15031	Family	k__Bacteria|p__Firmicutes|c__Clostridia|o__Clostridiales|f__Ruminococcaceae|g__GGB9602|s__GGB9602_SGB15031|t__SGB15031	0.0307438	19	19_0	Bacteria	Firmicutes_A	Clostridia	Oscillospirales	Oscillospiraceae	Faecousia	sp000434635	Group_19
s_9002000001230056_4.strict	92.31	0.93	0	1848877	37253	uSGB_14311	Other	k__Bacteria|p__Firmicutes|c__CFGB2984|o__OFGB2984|f__FGB2984|g__GGB9345|s__GGB9345_SGB14311|t__SGB14311	0.0217043	20	20_4	Bacteria	Firmicutes_A	Clostridia	Christensenellales	CAG-138	SFEL01	sp004557245	Group_20
s_9002000001312311_1.permissive	95.97	0.27	0	1721398	22537	uSGB_14311	Other	k__Bacteria|p__Firmicutes|c__CFGB2984|o__OFGB2984|f__FGB2984|g__GGB9345|s__GGB9345_SGB14311|t__SGB14311	0.0244726	20	20_1	Bacteria	Firmicutes_A	Clostridia	Christensenellales	CAG-138	SFEL01	sp004557245	Group_20
s_9002000001323502_14.orig	97.43	1.88	0	1674658	11537	uSGB_14311	Other	k__Bacteria|p__Firmicutes|c__CFGB2984|o__OFGB2984|f__FGB2984|g__GGB9345|s__GGB9345_SGB14311|t__SGB14311	0.0197042	20	20_3	Bacteria	Firmicutes_A	Clostridia	Christensenellales	CAG-138	SFEL01	sp004557245	Group_20
s_9002000001334186_11.permissive	92.88	1.08	0	1599165	20570	uSGB_14311	Other	k__Bacteria|p__Firmicutes|c__CFGB2984|o__OFGB2984|f__FGB2984|g__GGB9345|s__GGB9345_SGB14311|t__SGB14311	0.0203175	20	20_6	Bacteria	Firmicutes_A	Clostridia	Christensenellales	CAG-138	SFEL01	sp004557245	Group_20
s_9002000001353332_9.strict	95.54	1.08	0	1706084	10388	uSGB_14311	Other	k__Bacteria|p__Firmicutes|c__CFGB2984|o__OFGB2984|f__FGB2984|g__GGB9345|s__GGB9345_SGB14311|t__SGB14311	0.0221512	20	20_8	Bacteria	Firmicutes_A	Clostridia	Christensenellales	CAG-138	SFEL01	sp004557245	Group_20
s_9002000001406700_36.permissive	97.84	1.08	0	1672294	17474	uSGB_14311	Other	k__Bacteria|p__Firmicutes|c__CFGB2984|o__OFGB2984|f__FGB2984|g__GGB9345|s__GGB9345_SGB14311|t__SGB14311	0.019795	20	20_3	Bacteria	Firmicutes_A	Clostridia	Christensenellales	CAG-138	SFEL01	sp004557245	Group_20
s_9002000001462284_2.strict	91.8	1.08	0	1608999	11259	uSGB_14311	Other	k__Bacteria|p__Firmicutes|c__CFGB2984|o__OFGB2984|f__FGB2984|g__GGB9345|s__GGB9345_SGB14311|t__SGB14311	0.0202806	20	20_5	Bacteria	Firmicutes_A	Clostridia	Christensenellales	CAG-138	SFEL01	sp004557245	Group_20
s_9002000001473223_18.permissive	96.77	1.48	0	1653394	24069	uSGB_14311	Other	k__Bacteria|p__Firmicutes|c__CFGB2984|o__OFGB2984|f__FGB2984|g__GGB9345|s__GGB9345_SGB14311|t__SGB14311	0.0227859	20	20_9	Bacteria	Firmicutes_A	Clostridia	Christensenellales	CAG-138	SFEL01	sp004557245	Group_20
s_9002000001479951_24.strict	91.26	0.47	50	1777443	18727	uSGB_14311	Other	k__Bacteria|p__Firmicutes|c__CFGB2984|o__OFGB2984|f__FGB2984|g__GGB9345|s__GGB9345_SGB14311|t__SGB14311	0.0270394	20	20_2	Bacteria	Firmicutes_A	Clostridia	Christensenellales	CAG-138	SFEL01	sp004557245	Group_20
s_9002000001570129_36.permissive	95.97	1.88	33.33	1611991	13133	uSGB_14311	Other	k__Bacteria|p__Firmicutes|c__CFGB2984|o__OFGB2984|f__FGB2984|g__GGB9345|s__GGB9345_SGB14311|t__SGB14311	0.0202612	20	20_7	Bacteria	Firmicutes_A	Clostridia	Christensenellales	CAG-138	SFEL01	sp004557245	Group_20
s_9002000001480326_26.strict	95.7	0	0	1706050	22018	uSGB_9346	Other	k__Bacteria|p__Proteobacteria|c__CFGB2404|o__OFGB2404|f__FGB2404|g__GGB6612|s__GGB6612_SGB9346|t__SGB9346	0.022297	21	21_0	Bacteria	Proteobacteria	Alphaproteobacteria	RF32	CAG-239	Scatacola_A	faecigallinarum	Group_21
s_2009000001576810_26.permissive	93.29	0.56	0	1785108	15739	uSGB_4348	Other	k__Bacteria|p__Firmicutes|c__CFGB1349|o__OFGB1349|f__FGB1349|g__GGB3293|s__GGB3293_SGB4348|t__SGB4348	0.0213838	22	22_3	Bacteria	Firmicutes_A	Clostridia	Oscillospirales	Acutalibacteraceae	Fimenecus	sp000432435	Group_22
s_9002000001328080LL_8.strict	95.97	0.89	0	1749296	16111	uSGB_4348	Other	k__Bacteria|p__Firmicutes|c__CFGB1349|o__OFGB1349|f__FGB1349|g__GGB3293|s__GGB3293_SGB4348|t__SGB4348	0.0208563	22	22_1	Bacteria	Firmicutes_A	Clostridia	Oscillospirales	Acutalibacteraceae	Fimenecus	sp000432435	Group_22
s_9002000001475747_8.permissive	92.62	0.34	0	1696280	20079	uSGB_4348	Other	k__Bacteria|p__Firmicutes|c__CFGB1349|o__OFGB1349|f__FGB1349|g__GGB3293|s__GGB3293_SGB4348|t__SGB4348	0.0209233	22	22_2	Bacteria	Firmicutes_A	Clostridia	Oscillospirales	Acutalibacteraceae	Fimenecus	sp000432435	Group_22
s_9002000001179490_7.strict	92.25	2.42	0	1788319	15366	uSGB_14306	Other	k__Bacteria|p__Firmicutes|c__CFGB2982|o__OFGB2982|f__FGB2982|g__GGB9342|s__GGB9342_SGB14306|t__SGB14306	0.0177675	23	23_0	Bacteria	Firmicutes_A	Clostridia	Christensenellales	CAG-138	PeH17	sp000435055	Group_23
s_9002000001214606_10.strict	98.66	0	0	2634349	43112	kSGB_4198	Species	k__Bacteria|p__Firmicutes|c__Clostridia|o__Clostridiales|f__Ruminococcaceae|g__Ruminococcaceae_unclassified|s__Eubacterium_siraeum|t__SGB4198	0.0310834	24	24_5	Bacteria	Firmicutes_A	Clostridia	Oscillospirales	Ruminococcaceae	Ruminiclostridium_E	siraeum	Group_24
s_9002000001230056_25.permissive	96.98	0	0	2556164	38370	kSGB_4198	Species	k__Bacteria|p__Firmicutes|c__Clostridia|o__Clostridiales|f__Ruminococcaceae|g__Ruminococcaceae_unclassified|s__Eubacterium_siraeum|t__SGB4198	0.0305262	24	24_1	Bacteria	Firmicutes_A	Clostridia	Oscillospirales	Ruminococcaceae	Ruminiclostridium_E	siraeum	Group_24
s_9002000001261704_7.permissive	91.44	0.78	0	2267032	10238	kSGB_4198	Species	k__Bacteria|p__Firmicutes|c__Clostridia|o__Clostridiales|f__Ruminococcaceae|g__Ruminococcaceae_unclassified|s__Eubacterium_siraeum|t__SGB4198	0.029463	24	24_9	Bacteria	Firmicutes_A	Clostridia	Oscillospirales	Ruminococcaceae	Ruminiclostridium_E	siraeum	Group_24
s_9002000001285887_43.permissive	97.65	0	0	2469367	50736	kSGB_4198	Species	k__Bacteria|p__Firmicutes|c__Clostridia|o__Clostridiales|f__Ruminococcaceae|g__Ruminococcaceae_unclassified|s__Eubacterium_siraeum|t__SGB4198	0.0302811	24	24_7	Bacteria	Firmicutes_A	Clostridia	Oscillospirales	Ruminococcaceae	Ruminiclostridium_E	siraeum	Group_24
s_9002000001296209_12.strict	98.99	0	0	2648997	36793	kSGB_4198	Species	k__Bacteria|p__Firmicutes|c__Clostridia|o__Clostridiales|f__Ruminococcaceae|g__Ruminococcaceae_unclassified|s__Eubacterium_siraeum|t__SGB4198	0.0307777	24	24_8	Bacteria	Firmicutes_A	Clostridia	Oscillospirales	Ruminococcaceae	Ruminiclostridium_E	siraeum	Group_24
s_9002000001300660_6.permissive	92.37	0	0	2157405	8723	kSGB_4198	Species	k__Bacteria|p__Firmicutes|c__Clostridia|o__Clostridiales|f__Ruminococcaceae|g__Ruminococcaceae_unclassified|s__Eubacterium_siraeum|t__SGB4198	0.0316279	24	24_1	Bacteria	Firmicutes_A	Clostridia	Oscillospirales	Ruminococcaceae	Ruminiclostridium_E	siraeum	Group_24
s_9002000001380900_8.permissive	94.41	1.34	0	2345714	11955	kSGB_4198	Species	k__Bacteria|p__Firmicutes|c__Clostridia|o__Clostridiales|f__Ruminococcaceae|g__Ruminococcaceae_unclassified|s__Eubacterium_siraeum|t__SGB4198	0.0291231	24	24_11	Bacteria	Firmicutes_A	Clostridia	Oscillospirales	Ruminococcaceae	Ruminiclostridium_E	siraeum	Group_24
s_9002000001410009LL_24.permissive	92.79	1.34	50	2136804	9428	kSGB_4198	Species	k__Bacteria|p__Firmicutes|c__Clostridia|o__Clostridiales|f__Ruminococcaceae|g__Ruminococcaceae_unclassified|s__Eubacterium_siraeum|t__SGB4198	0.0310763	24	24_2	Bacteria	Firmicutes_A	Clostridia	Oscillospirales	Ruminococcaceae	Ruminiclostridium_E	siraeum	Group_24
s_9002000001435151_33.strict	97.65	0	0	2509499	37125	kSGB_4198	Species	k__Bacteria|p__Firmicutes|c__Clostridia|o__Clostridiales|f__Ruminococcaceae|g__Ruminococcaceae_unclassified|s__Eubacterium_siraeum|t__SGB4198	0.0307811	24	24_3	Bacteria	Firmicutes_A	Clostridia	Oscillospirales	Ruminococcaceae	Ruminiclostridium_E	siraeum	Group_24
s_9002000001439850_21.strict	98.32	0	0	2468817	24450	kSGB_4198	Species	k__Bacteria|p__Firmicutes|c__Clostridia|o__Clostridiales|f__Ruminococcaceae|g__Ruminococcaceae_unclassified|s__Eubacterium_siraeum|t__SGB4198	0.0297545	24	24_6	Bacteria	Firmicutes_A	Clostridia	Oscillospirales	Ruminococcaceae	Ruminiclostridium_E	siraeum	Group_24
s_9002000001444393_13.strict	94.3	0	0	2474200	40986	kSGB_4198	Species	k__Bacteria|p__Firmicutes|c__Clostridia|o__Clostridiales|f__Ruminococcaceae|g__Ruminococcaceae_unclassified|s__Eubacterium_siraeum|t__SGB4198	0.0297058	24	24_10	Bacteria	Firmicutes_A	Clostridia	Oscillospirales	Ruminococcaceae	Ruminiclostridium_E	siraeum	Group_24
s_9002000001473223_40.permissive	90.27	0	0	2594733	74878	kSGB_4198	Species	k__Bacteria|p__Firmicutes|c__Clostridia|o__Clostridiales|f__Ruminococcaceae|g__Ruminococcaceae_unclassified|s__Eubacterium_siraeum|t__SGB4198	0.0336361	24	24_4	Bacteria	Firmicutes_A	Clostridia	Oscillospirales	Ruminococcaceae	Ruminiclostridium_E	siraeum	Group_24
s_9005000001577950_15.permissive	98.99	0	0	2649292	48866	kSGB_4198	Species	k__Bacteria|p__Firmicutes|c__Clostridia|o__Clostridiales|f__Ruminococcaceae|g__Ruminococcaceae_unclassified|s__Eubacterium_siraeum|t__SGB4198	0.0297895	24	24_12	Bacteria	Firmicutes_A	Clostridia	Oscillospirales	Ruminococcaceae	Ruminiclostridium_E	siraeum	Group_24
s_9002000001375980_29.strict	93.62	0	0	2300751	18425	uSGB_4196	Genus	k__Bacteria|p__Firmicutes|c__Clostridia|o__Clostridiales|f__Ruminococcaceae|g__Ruminococcaceae_unclassified|s__Ruminococcaceae_unclassified_SGB4196|t__SGB4196	0.0181036	25	25_0	Bacteria	Firmicutes_A	Clostridia	Oscillospirales	Ruminococcaceae	Ruminiclostridium_E	sp003512525	Group_25
s_2009000001576810_13.permissive	95.21	0.68	0	2466904	14160	kSGB_4262	Species	k__Bacteria|p__Firmicutes|c__Clostridia|o__Clostridiales|f__Ruminococcaceae|g__Ruminococcus|s__Ruminococcus_bicirculans|t__SGB4262	0.026725	26	26_1	Bacteria	Firmicutes_A	Clostridia	Oscillospirales	Ruminococcaceae	Ruminococcus_D	bicirculans	Group_26
s_2009000001589950_2.permissive	91.78	0	0	2213413	12728	kSGB_4262	Species	k__Bacteria|p__Firmicutes|c__Clostridia|o__Clostridiales|f__Ruminococcaceae|g__Ruminococcus|s__Ruminococcus_bicirculans|t__SGB4262	0.0252432	26	26_31	Bacteria	Firmicutes_A	Clostridia	Oscillospirales	Ruminococcaceae	Ruminococcus_D	bicirculans	Group_26
s_9002000001179490_17.permissive	93.58	0	0	2296203	10877	kSGB_4262	Species	k__Bacteria|p__Firmicutes|c__Clostridia|o__Clostridiales|f__Ruminococcaceae|g__Ruminococcus|s__Ruminococcus_bicirculans|t__SGB4262	0.0258339	26	26_46	Bacteria	Firmicutes_A	Clostridia	Oscillospirales	Ruminococcaceae	Ruminococcus_D	bicirculans	Group_26
s_9002000001202507_9.permissive	98.63	0	0	2578516	34855	kSGB_4262	Species	k__Bacteria|p__Firmicutes|c__Clostridia|o__Clostridiales|f__Ruminococcaceae|g__Ruminococcus|s__Ruminococcus_bicirculans|t__SGB4262	0.025256	26	26_30	Bacteria	Firmicutes_A	Clostridia	Oscillospirales	Ruminococcaceae	Ruminococcus_D	bicirculans	Group_26
s_9002000001206711LL_17.permissive	95.21	0	0	2345205	34043	kSGB_4262	Species	k__Bacteria|p__Firmicutes|c__Clostridia|o__Clostridiales|f__Ruminococcaceae|g__Ruminococcus|s__Ruminococcus_bicirculans|t__SGB4262	0.0249901	26	26_5	Bacteria	Firmicutes_A	Clostridia	Oscillospirales	Ruminococcaceae	Ruminococcus_D	bicirculans	Group_26
s_9002000001211023_13.permissive	91.32	1.14	33.33	2037839	6029	kSGB_4262	Species	k__Bacteria|p__Firmicutes|c__Clostridia|o__Clostridiales|f__Ruminococcaceae|g__Ruminococcus|s__Ruminococcus_bicirculans|t__SGB4262	0.0261041	26	26_20	Bacteria	Firmicutes_A	Clostridia	Oscillospirales	Ruminococcaceae	Ruminococcus_D	bicirculans	Group_26
s_9002000001212011_11.permissive	93.37	0.91	50	2250190	12372	kSGB_4262	Species	k__Bacteria|p__Firmicutes|c__Clostridia|o__Clostridiales|f__Ruminococcaceae|g__Ruminococcus|s__Ruminococcus_bicirculans|t__SGB4262	0.0260228	26	26_8	Bacteria	Firmicutes_A	Clostridia	Oscillospirales	Ruminococcaceae	Ruminococcus_D	bicirculans	Group_26
s_9002000001225234_10.permissive	98.63	0	0	2621103	93563	kSGB_4262	Species	k__Bacteria|p__Firmicutes|c__Clostridia|o__Clostridiales|f__Ruminococcaceae|g__Ruminococcus|s__Ruminococcus_bicirculans|t__SGB4262	0.0253541	26	26_7	Bacteria	Firmicutes_A	Clostridia	Oscillospirales	Ruminococcaceae	Ruminococcus_D	bicirculans	Group_26
s_9002000001225833_21.permissive	97.32	0	0	2345820	37086	kSGB_4262	Species	k__Bacteria|p__Firmicutes|c__Clostridia|o__Clostridiales|f__Ruminococcaceae|g__Ruminococcus|s__Ruminococcus_bicirculans|t__SGB4262	0.025007	26	26_21	Bacteria	Firmicutes_A	Clostridia	Oscillospirales	Ruminococcaceae	Ruminococcus_D	bicirculans	Group_26
s_9002000001226607_8.strict	97.03	0	0	2359454	18156	kSGB_4262	Species	k__Bacteria|p__Firmicutes|c__Clostridia|o__Clostridiales|f__Ruminococcaceae|g__Ruminococcus|s__Ruminococcus_bicirculans|t__SGB4262	0.0255791	26	26_3	Bacteria	Firmicutes_A	Clostridia	Oscillospirales	Ruminococcaceae	Ruminococcus_D	bicirculans	Group_26
s_9002000001230056_16.strict	97.95	0.68	0	2455424	28679	kSGB_4262	Species	k__Bacteria|p__Firmicutes|c__Clostridia|o__Clostridiales|f__Ruminococcaceae|g__Ruminococcus|s__Ruminococcus_bicirculans|t__SGB4262	0.0262355	26	26_24	Bacteria	Firmicutes_A	Clostridia	Oscillospirales	Ruminococcaceae	Ruminococcus_D	bicirculans	Group_26
s_9002000001242988_35.permissive	93.84	0.57	100	2299359	14794	kSGB_4262	Species	k__Bacteria|p__Firmicutes|c__Clostridia|o__Clostridiales|f__Ruminococcaceae|g__Ruminococcus|s__Ruminococcus_bicirculans|t__SGB4262	0.0256257	26	26_14	Bacteria	Firmicutes_A	Clostridia	Oscillospirales	Ruminococcaceae	Ruminococcus_D	bicirculans	Group_26
s_9002000001246252_26.permissive	98.63	0	0	2556618	69470	kSGB_4262	Species	k__Bacteria|p__Firmicutes|c__Clostridia|o__Clostridiales|f__Ruminococcaceae|g__Ruminococcus|s__Ruminococcus_bicirculans|t__SGB4262	0.024538	26	26_29	Bacteria	Firmicutes_A	Clostridia	Oscillospirales	Ruminococcaceae	Ruminococcus_D	bicirculans	Group_26
s_9002000001250148_15.orig	92.33	0	0	2250408	8392	kSGB_4262	Species	k__Bacteria|p__Firmicutes|c__Clostridia|o__Clostridiales|f__Ruminococcaceae|g__Ruminococcus|s__Ruminococcus_bicirculans|t__SGB4262	0.0269105	26	26_47	Bacteria	Firmicutes_A	Clostridia	Oscillospirales	Ruminococcaceae	Ruminococcus_D	bicirculans	Group_26
s_9002000001260888_19.strict	98.63	0	0	2654053	107184	kSGB_4262	Species	k__Bacteria|p__Firmicutes|c__Clostridia|o__Clostridiales|f__Ruminococcaceae|g__Ruminococcus|s__Ruminococcus_bicirculans|t__SGB4262	0.0261374	26	26_4	Bacteria	Firmicutes_A	Clostridia	Oscillospirales	Ruminococcaceae	Ruminococcus_D	bicirculans	Group_26
s_9002000001261704_5.permissive	90.38	1.37	50	2066658	6807	kSGB_4262	Species	k__Bacteria|p__Firmicutes|c__Clostridia|o__Clostridiales|f__Ruminococcaceae|g__Ruminococcus|s__Ruminococcus_bicirculans|t__SGB4262	0.0261268	26	26_19	Bacteria	Firmicutes_A	Clostridia	Oscillospirales	Ruminococcaceae	Ruminococcus_D	bicirculans	Group_26
s_9002000001262004_4.permissive	97.95	0.17	0	2545002	20989	kSGB_4262	Species	k__Bacteria|p__Firmicutes|c__Clostridia|o__Clostridiales|f__Ruminococcaceae|g__Ruminococcus|s__Ruminococcus_bicirculans|t__SGB4262	0.0254105	26	26_27	Bacteria	Firmicutes_A	Clostridia	Oscillospirales	Ruminococcaceae	Ruminococcus_D	bicirculans	Group_26
s_9002000001264644_3.strict	94.98	0	0	2375650	13838	kSGB_4262	Species	k__Bacteria|p__Firmicutes|c__Clostridia|o__Clostridiales|f__Ruminococcaceae|g__Ruminococcus|s__Ruminococcus_bicirculans|t__SGB4262	0.0250014	26	26_17	Bacteria	Firmicutes_A	Clostridia	Oscillospirales	Ruminococcaceae	Ruminococcus_D	bicirculans	Group_26
s_9002000001267207_12.permissive	96.23	1.37	50	2409978	17554	kSGB_4262	Species	k__Bacteria|p__Firmicutes|c__Clostridia|o__Clostridiales|f__Ruminococcaceae|g__Ruminococcus|s__Ruminococcus_bicirculans|t__SGB4262	0.0243832	26	26_17	Bacteria	Firmicutes_A	Clostridia	Oscillospirales	Ruminococcaceae	Ruminococcus_D	bicirculans	Group_26
s_9002000001277188LL_7.strict	97.95	0	0	2555565	57721	kSGB_4262	Species	k__Bacteria|p__Firmicutes|c__Clostridia|o__Clostridiales|f__Ruminococcaceae|g__Ruminococcus|s__Ruminococcus_bicirculans|t__SGB4262	0.0250807	26	26_12	Bacteria	Firmicutes_A	Clostridia	Oscillospirales	Ruminococcaceae	Ruminococcus_D	bicirculans	Group_26
s_9002000001285887_46.permissive	96.58	0	0	2593333	76974	kSGB_4262	Species	k__Bacteria|p__Firmicutes|c__Clostridia|o__Clostridiales|f__Ruminococcaceae|g__Ruminococcus|s__Ruminococcus_bicirculans|t__SGB4262	0.0268308	26	26_42	Bacteria	Firmicutes_A	Clostridia	Oscillospirales	Ruminococcaceae	Ruminococcus_D	bicirculans	Group_26
s_9002000001288940_45.strict	95.89	0	0	2427960	57084	kSGB_4262	Species	k__Bacteria|p__Firmicutes|c__Clostridia|o__Clostridiales|f__Ruminococcaceae|g__Ruminococcus|s__Ruminococcus_bicirculans|t__SGB4262	0.0250938	26	26_26	Bacteria	Firmicutes_A	Clostridia	Oscillospirales	Ruminococcaceae	Ruminococcus_D	bicirculans	Group_26
s_9002000001294380_2.permissive	98.63	0	0	2555238	39098	kSGB_4262	Species	k__Bacteria|p__Firmicutes|c__Clostridia|o__Clostridiales|f__Ruminococcaceae|g__Ruminococcus|s__Ruminococcus_bicirculans|t__SGB4262	0.0243687	26	26_36	Bacteria	Firmicutes_A	Clostridia	Oscillospirales	Ruminococcaceae	Ruminococcus_D	bicirculans	Group_26
s_9002000001295598_18.strict	97.95	0	0	2511337	45889	kSGB_4262	Species	k__Bacteria|p__Firmicutes|c__Clostridia|o__Clostridiales|f__Ruminococcaceae|g__Ruminococcus|s__Ruminococcus_bicirculans|t__SGB4262	0.0251872	26	26_18	Bacteria	Firmicutes_A	Clostridia	Oscillospirales	Ruminococcaceae	Ruminococcus_D	bicirculans	Group_26
s_9002000001303715_37.strict	91.78	0	0	2305647	54546	kSGB_4262	Species	k__Bacteria|p__Firmicutes|c__Clostridia|o__Clostridiales|f__Ruminococcaceae|g__Ruminococcus|s__Ruminococcus_bicirculans|t__SGB4262	0.0255031	26	26_29	Bacteria	Firmicutes_A	Clostridia	Oscillospirales	Ruminococcaceae	Ruminococcus_D	bicirculans	Group_26
s_9002000001316393_44.strict	97.26	0	0	2578829	37086	kSGB_4262	Species	k__Bacteria|p__Firmicutes|c__Clostridia|o__Clostridiales|f__Ruminococcaceae|g__Ruminococcus|s__Ruminococcus_bicirculans|t__SGB4262	0.0258654	26	26_26	Bacteria	Firmicutes_A	Clostridia	Oscillospirales	Ruminococcaceae	Ruminococcus_D	bicirculans	Group_26
s_9002000001331184_25.strict	98.63	0	0	2439725	40363	kSGB_4262	Species	k__Bacteria|p__Firmicutes|c__Clostridia|o__Clostridiales|f__Ruminococcaceae|g__Ruminococcus|s__Ruminococcus_bicirculans|t__SGB4262	0.024231	26	26_40	Bacteria	Firmicutes_A	Clostridia	Oscillospirales	Ruminococcaceae	Ruminococcus_D	bicirculans	Group_26
s_9002000001338668_15.permissive	94.18	0.68	100	2344928	16618	kSGB_4262	Species	k__Bacteria|p__Firmicutes|c__Clostridia|o__Clostridiales|f__Ruminococcaceae|g__Ruminococcus|s__Ruminococcus_bicirculans|t__SGB4262	0.0254273	26	26_10	Bacteria	Firmicutes_A	Clostridia	Oscillospirales	Ruminococcaceae	Ruminococcus_D	bicirculans	Group_26
s_9002000001341467_30.permissive	92.24	0.37	0	2104978	11908	kSGB_4262	Species	k__Bacteria|p__Firmicutes|c__Clostridia|o__Clostridiales|f__Ruminococcaceae|g__Ruminococcus|s__Ruminococcus_bicirculans|t__SGB4262	0.0242837	26	26_38	Bacteria	Firmicutes_A	Clostridia	Oscillospirales	Ruminococcaceae	Ruminococcus_D	bicirculans	Group_26
s_9002000001352980_19.permissive	98.4	0	0	2533339	48581	kSGB_4262	Species	k__Bacteria|p__Firmicutes|c__Clostridia|o__Clostridiales|f__Ruminococcaceae|g__Ruminococcus|s__Ruminococcus_bicirculans|t__SGB4262	0.0265198	26	26_42	Bacteria	Firmicutes_A	Clostridia	Oscillospirales	Ruminococcaceae	Ruminococcus_D	bicirculans	Group_26
s_9002000001359499_17.permissive	97.26	0	0	2708596	84151	kSGB_4262	Species	k__Bacteria|p__Firmicutes|c__Clostridia|o__Clostridiales|f__Ruminococcaceae|g__Ruminococcus|s__Ruminococcus_bicirculans|t__SGB4262	0.0254502	26	26_23	Bacteria	Firmicutes_A	Clostridia	Oscillospirales	Ruminococcaceae	Ruminococcus_D	bicirculans	Group_26
s_9002000001367051_13.strict	97.95	0	0	2542431	44388	kSGB_4262	Species	k__Bacteria|p__Firmicutes|c__Clostridia|o__Clostridiales|f__Ruminococcaceae|g__Ruminococcus|s__Ruminococcus_bicirculans|t__SGB4262	0.0245342	26	26_33	Bacteria	Firmicutes_A	Clostridia	Oscillospirales	Ruminococcaceae	Ruminococcus_D	bicirculans	Group_26
s_9002000001371690_16.strict	95.43	0	0	2442054	17089	kSGB_4262	Species	k__Bacteria|p__Firmicutes|c__Clostridia|o__Clostridiales|f__Ruminococcaceae|g__Ruminococcus|s__Ruminococcus_bicirculans|t__SGB4262	0.0249522	26	26_6	Bacteria	Firmicutes_A	Clostridia	Oscillospirales	Ruminococcaceae	Ruminococcus_D	bicirculans	Group_26
s_9002000001372130_16.permissive	93.28	0.23	100	2151377	10102	kSGB_4262	Species	k__Bacteria|p__Firmicutes|c__Clostridia|o__Clostridiales|f__Ruminococcaceae|g__Ruminococcus|s__Ruminococcus_bicirculans|t__SGB4262	0.0256287	26	26_41	Bacteria	Firmicutes_A	Clostridia	Oscillospirales	Ruminococcaceae	Ruminococcus_D	bicirculans	Group_26
s_9002000001377630_38.permissive	97.26	0	0	2476835	43533	kSGB_4262	Species	k__Bacteria|p__Firmicutes|c__Clostridia|o__Clostridiales|f__Ruminococcaceae|g__Ruminococcus|s__Ruminococcus_bicirculans|t__SGB4262	0.0241997	26	26_21	Bacteria	Firmicutes_A	Clostridia	Oscillospirales	Ruminococcaceae	Ruminococcus_D	bicirculans	Group_26
s_9002000001385621_27.permissive	97.03	0	0	2494939	27991	kSGB_4262	Species	k__Bacteria|p__Firmicutes|c__Clostridia|o__Clostridiales|f__Ruminococcaceae|g__Ruminococcus|s__Ruminococcus_bicirculans|t__SGB4262	0.0247442	26	26_21	Bacteria	Firmicutes_A	Clostridia	Oscillospirales	Ruminococcaceae	Ruminococcus_D	bicirculans	Group_26
s_9002000001392958_44.permissive	93.26	0.23	0	2413323	12991	kSGB_4262	Species	k__Bacteria|p__Firmicutes|c__Clostridia|o__Clostridiales|f__Ruminococcaceae|g__Ruminococcus|s__Ruminococcus_bicirculans|t__SGB4262	0.0258113	26	26_15	Bacteria	Firmicutes_A	Clostridia	Oscillospirales	Ruminococcaceae	Ruminococcus_D	bicirculans	Group_26
s_9002000001394021_1.strict	97.95	0	0	2543593	43612	kSGB_4262	Species	k__Bacteria|p__Firmicutes|c__Clostridia|o__Clostridiales|f__Ruminococcaceae|g__Ruminococcus|s__Ruminococcus_bicirculans|t__SGB4262	0.0255193	26	26_18	Bacteria	Firmicutes_A	Clostridia	Oscillospirales	Ruminococcaceae	Ruminococcus_D	bicirculans	Group_26
s_9002000001395539_33.strict	98.63	0	0	2628309	82439	kSGB_4262	Species	k__Bacteria|p__Firmicutes|c__Clostridia|o__Clostridiales|f__Ruminococcaceae|g__Ruminococcus|s__Ruminococcus_bicirculans|t__SGB4262	0.0261417	26	26_44	Bacteria	Firmicutes_A	Clostridia	Oscillospirales	Ruminococcaceae	Ruminococcus_D	bicirculans	Group_26
s_9002000001401430_6.strict	98.63	0.11	100	2652448	50600	kSGB_4262	Species	k__Bacteria|p__Firmicutes|c__Clostridia|o__Clostridiales|f__Ruminococcaceae|g__Ruminococcus|s__Ruminococcus_bicirculans|t__SGB4262	0.0251851	26	26_28	Bacteria	Firmicutes_A	Clostridia	Oscillospirales	Ruminococcaceae	Ruminococcus_D	bicirculans	Group_26
s_9002000001402221_20.strict	97.26	0.34	0	2420624	20302	kSGB_4262	Species	k__Bacteria|p__Firmicutes|c__Clostridia|o__Clostridiales|f__Ruminococcaceae|g__Ruminococcus|s__Ruminococcus_bicirculans|t__SGB4262	0.0245175	26	26_29	Bacteria	Firmicutes_A	Clostridia	Oscillospirales	Ruminococcaceae	Ruminococcus_D	bicirculans	Group_26
s_9002000001408172_1.strict	93.15	0.34	0	2487483	26956	kSGB_4262	Species	k__Bacteria|p__Firmicutes|c__Clostridia|o__Clostridiales|f__Ruminococcaceae|g__Ruminococcus|s__Ruminococcus_bicirculans|t__SGB4262	0.0260924	26	26_18	Bacteria	Firmicutes_A	Clostridia	Oscillospirales	Ruminococcaceae	Ruminococcus_D	bicirculans	Group_26
s_9002000001412150_15.strict	97.26	0	0	2533030	115705	kSGB_4262	Species	k__Bacteria|p__Firmicutes|c__Clostridia|o__Clostridiales|f__Ruminococcaceae|g__Ruminococcus|s__Ruminococcus_bicirculans|t__SGB4262	0.024805	26	26_19	Bacteria	Firmicutes_A	Clostridia	Oscillospirales	Ruminococcaceae	Ruminococcus_D	bicirculans	Group_26
s_9002000001412522_31.permissive	97.26	0	0	2500731	47601	kSGB_4262	Species	k__Bacteria|p__Firmicutes|c__Clostridia|o__Clostridiales|f__Ruminococcaceae|g__Ruminococcus|s__Ruminococcus_bicirculans|t__SGB4262	0.0245119	26	26_13	Bacteria	Firmicutes_A	Clostridia	Oscillospirales	Ruminococcaceae	Ruminococcus_D	bicirculans	Group_26
s_9002000001421826_2.strict	96.58	0	0	2478215	33892	kSGB_4262	Species	k__Bacteria|p__Firmicutes|c__Clostridia|o__Clostridiales|f__Ruminococcaceae|g__Ruminococcus|s__Ruminococcus_bicirculans|t__SGB4262	0.0247027	26	26_22	Bacteria	Firmicutes_A	Clostridia	Oscillospirales	Ruminococcaceae	Ruminococcus_D	bicirculans	Group_26
s_9002000001445318_17.permissive	97.95	0	0	2663863	123823	kSGB_4262	Species	k__Bacteria|p__Firmicutes|c__Clostridia|o__Clostridiales|f__Ruminococcaceae|g__Ruminococcus|s__Ruminococcus_bicirculans|t__SGB4262	0.0253172	26	26_32	Bacteria	Firmicutes_A	Clostridia	Oscillospirales	Ruminococcaceae	Ruminococcus_D	bicirculans	Group_26
s_9002000001446520_26.permissive	97.26	0.68	100	2363115	30296	kSGB_4262	Species	k__Bacteria|p__Firmicutes|c__Clostridia|o__Clostridiales|f__Ruminococcaceae|g__Ruminococcus|s__Ruminococcus_bicirculans|t__SGB4262	0.0239863	26	26_34	Bacteria	Firmicutes_A	Clostridia	Oscillospirales	Ruminococcaceae	Ruminococcus_D	bicirculans	Group_26
s_9002000001447950_13.permissive	95.38	1.03	50	2321377	19495	kSGB_4262	Species	k__Bacteria|p__Firmicutes|c__Clostridia|o__Clostridiales|f__Ruminococcaceae|g__Ruminococcus|s__Ruminococcus_bicirculans|t__SGB4262	0.0252448	26	26_39	Bacteria	Firmicutes_A	Clostridia	Oscillospirales	Ruminococcaceae	Ruminococcus_D	bicirculans	Group_26
s_9002000001448688_20.strict	90.3	0.23	0	2262628	8893	kSGB_4262	Species	k__Bacteria|p__Firmicutes|c__Clostridia|o__Clostridiales|f__Ruminococcaceae|g__Ruminococcus|s__Ruminococcus_bicirculans|t__SGB4262	0.0268289	26	26_48	Bacteria	Firmicutes_A	Clostridia	Oscillospirales	Ruminococcaceae	Ruminococcus_D	bicirculans	Group_26
s_9002000001454080_9.permissive	97.95	0	0	2472961	99679	kSGB_4262	Species	k__Bacteria|p__Firmicutes|c__Clostridia|o__Clostridiales|f__Ruminococcaceae|g__Ruminococcus|s__Ruminococcus_bicirculans|t__SGB4262	0.0240433	26	26_37	Bacteria	Firmicutes_A	Clostridia	Oscillospirales	Ruminococcaceae	Ruminococcus_D	bicirculans	Group_26
s_9002000001454470_22.strict	96.58	0	0	2348589	41324	kSGB_4262	Species	k__Bacteria|p__Firmicutes|c__Clostridia|o__Clostridiales|f__Ruminococcaceae|g__Ruminococcus|s__Ruminococcus_bicirculans|t__SGB4262	0.0259274	26	26_25	Bacteria	Firmicutes_A	Clostridia	Oscillospirales	Ruminococcaceae	Ruminococcus_D	bicirculans	Group_26
s_9002000001463497_17.strict	96.58	0	0	2309539	17165	kSGB_4262	Species	k__Bacteria|p__Firmicutes|c__Clostridia|o__Clostridiales|f__Ruminococcaceae|g__Ruminococcus|s__Ruminococcus_bicirculans|t__SGB4262	0.0239919	26	26_11	Bacteria	Firmicutes_A	Clostridia	Oscillospirales	Ruminococcaceae	Ruminococcus_D	bicirculans	Group_26
s_9002000001523343_20.permissive	99.32	0	0	2556637	38131	kSGB_4262	Species	k__Bacteria|p__Firmicutes|c__Clostridia|o__Clostridiales|f__Ruminococcaceae|g__Ruminococcus|s__Ruminococcus_bicirculans|t__SGB4262	0.0262557	26	26_9	Bacteria	Firmicutes_A	Clostridia	Oscillospirales	Ruminococcaceae	Ruminococcus_D	bicirculans	Group_26
s_9002000001523405_15.strict	91.78	0	0	2527256	69825	kSGB_4262	Species	k__Bacteria|p__Firmicutes|c__Clostridia|o__Clostridiales|f__Ruminococcaceae|g__Ruminococcus|s__Ruminococcus_bicirculans|t__SGB4262	0.0280696	26	26_9	Bacteria	Firmicutes_A	Clostridia	Oscillospirales	Ruminococcaceae	Ruminococcus_D	bicirculans	Group_26
s_9002000001537510_3.permissive	96.58	0.75	0	2178338	14166	kSGB_4262	Species	k__Bacteria|p__Firmicutes|c__Clostridia|o__Clostridiales|f__Ruminococcaceae|g__Ruminococcus|s__Ruminococcus_bicirculans|t__SGB4262	0.0262822	26	26_2	Bacteria	Firmicutes_A	Clostridia	Oscillospirales	Ruminococcaceae	Ruminococcus_D	bicirculans	Group_26
s_9002000001572920_15.strict	96.35	0.68	0	2245732	12952	kSGB_4262	Species	k__Bacteria|p__Firmicutes|c__Clostridia|o__Clostridiales|f__Ruminococcaceae|g__Ruminococcus|s__Ruminococcus_bicirculans|t__SGB4262	0.0252108	26	26_16	Bacteria	Firmicutes_A	Clostridia	Oscillospirales	Ruminococcaceae	Ruminococcus_D	bicirculans	Group_26
s_9002000001577190_11.permissive	98.63	0	0	2409146	70364	kSGB_4262	Species	k__Bacteria|p__Firmicutes|c__Clostridia|o__Clostridiales|f__Ruminococcaceae|g__Ruminococcus|s__Ruminococcus_bicirculans|t__SGB4262	0.0241865	26	26_35	Bacteria	Firmicutes_A	Clostridia	Oscillospirales	Ruminococcaceae	Ruminococcus_D	bicirculans	Group_26
s_9002000001577850_20.permissive	92.92	0	0	2060092	8298	kSGB_4262	Species	k__Bacteria|p__Firmicutes|c__Clostridia|o__Clostridiales|f__Ruminococcaceae|g__Ruminococcus|s__Ruminococcus_bicirculans|t__SGB4262	0.0258421	26	26_45	Bacteria	Firmicutes_A	Clostridia	Oscillospirales	Ruminococcaceae	Ruminococcus_D	bicirculans	Group_26
s_9002000001582170_1.strict	96.58	0	0	2469869	62950	kSGB_4262	Species	k__Bacteria|p__Firmicutes|c__Clostridia|o__Clostridiales|f__Ruminococcaceae|g__Ruminococcus|s__Ruminococcus_bicirculans|t__SGB4262	0.0263311	26	26_43	Bacteria	Firmicutes_A	Clostridia	Oscillospirales	Ruminococcaceae	Ruminococcus_D	bicirculans	Group_26
s_9002000001588517_23.orig	95.89	0.68	100	2202107	11081	kSGB_4262	Species	k__Bacteria|p__Firmicutes|c__Clostridia|o__Clostridiales|f__Ruminococcaceae|g__Ruminococcus|s__Ruminococcus_bicirculans|t__SGB4262	0.0252245	26	26_26	Bacteria	Firmicutes_A	Clostridia	Oscillospirales	Ruminococcaceae	Ruminococcus_D	bicirculans	Group_26
s_9002000001479951_22.strict	96.23	1.14	33.33	2540887	45363	kSGB_4239	Species	k__Bacteria|p__Firmicutes|c__Clostridia|o__Clostridiales|f__Ruminococcaceae|g__Ruminococcus|s__Ruminococcus_albus|t__SGB4239	0.235108	27	27_0	Bacteria	Firmicutes_A	Clostridia	Oscillospirales	Ruminococcaceae	Ruminococcus_D	sp017626015	Group_27
s_9002000001202875_8.strict	94.41	1.01	0	2562923	25916	uSGB_4268	Other	k__Bacteria|p__Firmicutes|c__CFGB1334|o__OFGB1334|f__FGB1334|g__GGB3231|s__GGB3231_SGB4268|t__SGB4268	0.202933	28	28_9	Bacteria	Firmicutes_A	Clostridia	UBA1381	UBA1381	CAG-41	sp900066215	Group_28
s_9002000001225234_13.strict	90.47	0	0	2025419	11050	uSGB_4269	Other	k__Bacteria|p__Firmicutes|c__CFGB1334|o__OFGB1334|f__FGB1334|g__GGB3232|s__GGB3232_SGB4269|t__SGB4269	0.0264893	28	28_2	Bacteria	Firmicutes_A	Clostridia	UBA1381	UBA1381	CAG-41	sp900066215	Group_28
s_9002000001228076LL_1.strict	94.3	0.67	0	2460618	22148	uSGB_4269	Other	k__Bacteria|p__Firmicutes|c__CFGB1334|o__OFGB1334|f__FGB1334|g__GGB3232|s__GGB3232_SGB4269|t__SGB4269	0.0274577	28	28_1	Bacteria	Firmicutes_A	Clostridia	UBA1381	UBA1381	CAG-41	sp900066215	Group_28
s_9002000001243214_21.orig	92.28	1.01	0	2071987	8902	uSGB_4269	Other	k__Bacteria|p__Firmicutes|c__CFGB1334|o__OFGB1334|f__FGB1334|g__GGB3232|s__GGB3232_SGB4269|t__SGB4269	0.0261917	28	28_4	Bacteria	Firmicutes_A	Clostridia	UBA1381	UBA1381	CAG-41	sp900066215	Group_28
s_9002000001244042_40.strict	95.3	0.67	0	2452013	68364	uSGB_4269	Other	k__Bacteria|p__Firmicutes|c__CFGB1334|o__OFGB1334|f__FGB1334|g__GGB3232|s__GGB3232_SGB4269|t__SGB4269	0.025482	28	28_3	Bacteria	Firmicutes_A	Clostridia	UBA1381	UBA1381	CAG-41	sp900066215	Group_28
s_9002000001252044_7.orig	93.23	0.34	0	2249472	10713	uSGB_4269	Other	k__Bacteria|p__Firmicutes|c__CFGB1334|o__OFGB1334|f__FGB1334|g__GGB3232|s__GGB3232_SGB4269|t__SGB4269	0.0272268	28	28_1	Bacteria	Firmicutes_A	Clostridia	UBA1381	UBA1381	CAG-41	sp900066215	Group_28
s_9002000001400933_8.strict	97.32	1.01	0	2301673	18006	uSGB_4269	Other	k__Bacteria|p__Firmicutes|c__CFGB1334|o__OFGB1334|f__FGB1334|g__GGB3232|s__GGB3232_SGB4269|t__SGB4269	0.0252618	28	28_5	Bacteria	Firmicutes_A	Clostridia	UBA1381	UBA1381	CAG-41	sp900066215	Group_28
s_9002000001406680_37.strict	91.95	2.01	0	2093283	12445	uSGB_4269	Other	k__Bacteria|p__Firmicutes|c__CFGB1334|o__OFGB1334|f__FGB1334|g__GGB3232|s__GGB3232_SGB4269|t__SGB4269	0.0250616	28	28_6	Bacteria	Firmicutes_A	Clostridia	UBA1381	UBA1381	CAG-41	sp900066215	Group_28
s_9002000001447950_14.strict	93.62	0.67	0	2324593	12500	uSGB_4269	Other	k__Bacteria|p__Firmicutes|c__CFGB1334|o__OFGB1334|f__FGB1334|g__GGB3232|s__GGB3232_SGB4269|t__SGB4269	0.0279993	28	28_1	Bacteria	Firmicutes_A	Clostridia	UBA1381	UBA1381	CAG-41	sp900066215	Group_28
s_9002000001497216_52.strict	95.53	0.67	0	2480444	17671	uSGB_4269	Other	k__Bacteria|p__Firmicutes|c__CFGB1334|o__OFGB1334|f__FGB1334|g__GGB3232|s__GGB3232_SGB4269|t__SGB4269	0.0264464	28	28_7	Bacteria	Firmicutes_A	Clostridia	UBA1381	UBA1381	CAG-41	sp900066215	Group_28
s_9002000001531363_36.permissive	94.24	0.89	50	2068325	10588	uSGB_4269	Other	k__Bacteria|p__Firmicutes|c__CFGB1334|o__OFGB1334|f__FGB1334|g__GGB3232|s__GGB3232_SGB4269|t__SGB4269	0.0240669	28	28_8	Bacteria	Firmicutes_A	Clostridia	UBA1381	UBA1381	CAG-41	sp900066215	Group_28
s_9002000001589917_9.strict	95.33	1.44	50	2025427	17808	kSGB_2286	Species	k__Bacteria|p__Bacteroidetes|c__Bacteroidia|o__Bacteroidales|f__Rikenellaceae|g__Alistipes|s__Alistipes_inops|t__SGB2286	0.0100268	29	29_0	Bacteria	Bacteroidota	Bacteroidia	Bacteroidales	Rikenellaceae	Tidjanibacter	inops_A	Group_29
s_9002000001250513_7.strict	96.31	0	0	1976962	19155	uSGB_4280	Family	k__Bacteria|p__Firmicutes|c__Clostridia|o__Clostridiales|f__Ruminococcaceae|g__GGB3240|s__GGB3240_SGB4280|t__SGB4280	0.0198297	30	30_1	Bacteria	Firmicutes_A	Clostridia	Oscillospirales	Acutalibacteraceae	Pseudoruminococcus_A	massiliensis	Group_30
s_9002000001380900_26.orig	90.94	0	0	1899657	24847	uSGB_4280	Family	k__Bacteria|p__Firmicutes|c__Clostridia|o__Clostridiales|f__Ruminococcaceae|g__GGB3240|s__GGB3240_SGB4280|t__SGB4280	0.0194429	30	30_1	Bacteria	Firmicutes_A	Clostridia	Oscillospirales	Acutalibacteraceae	Pseudoruminococcus_A	massiliensis	Group_30
s_9002000001473223_39.strict	90.27	0	0	1912032	66080	uSGB_4280	Family	k__Bacteria|p__Firmicutes|c__Clostridia|o__Clostridiales|f__Ruminococcaceae|g__GGB3240|s__GGB3240_SGB4280|t__SGB4280	0.0223819	30	30_1	Bacteria	Firmicutes_A	Clostridia	Oscillospirales	Acutalibacteraceae	Pseudoruminococcus_A	massiliensis	Group_30
s_9002000001521670_29.permissive	93.74	0.34	0	1756489	13559	uSGB_4280	Family	k__Bacteria|p__Firmicutes|c__Clostridia|o__Clostridiales|f__Ruminococcaceae|g__GGB3240|s__GGB3240_SGB4280|t__SGB4280	0.0203328	30	30_1	Bacteria	Firmicutes_A	Clostridia	Oscillospirales	Acutalibacteraceae	Pseudoruminococcus_A	massiliensis	Group_30
s_9002000001588517_24.permissive	93.62	0	0	1696298	10119	uSGB_4280	Family	k__Bacteria|p__Firmicutes|c__Clostridia|o__Clostridiales|f__Ruminococcaceae|g__GGB3240|s__GGB3240_SGB4280|t__SGB4280	0.0226095	30	30_2	Bacteria	Firmicutes_A	Clostridia	Oscillospirales	Acutalibacteraceae	Pseudoruminococcus_A	massiliensis	Group_30
s_9002000001250148_24.permissive	95.97	0	0	1903543	9996	uSGB_4272	Family	k__Bacteria|p__Firmicutes|c__Clostridia|o__Clostridiales|f__Ruminococcaceae|g__GGB3235|s__GGB3235_SGB4272|t__SGB4272	0.02532	31	31_1	Bacteria	Firmicutes_A	Clostridia	Oscillospirales	Acutalibacteraceae	Ruminococcus_E	sp900314705	Group_31
s_9002000001282052_33.permissive	95.53	0	0	1926578	13469	uSGB_4272	Family	k__Bacteria|p__Firmicutes|c__Clostridia|o__Clostridiales|f__Ruminococcaceae|g__GGB3235|s__GGB3235_SGB4272|t__SGB4272	0.0245657	31	31_1	Bacteria	Firmicutes_A	Clostridia	Oscillospirales	Acutalibacteraceae	Ruminococcus_E	sp900314705	Group_31
s_9002000001295785_2.permissive	92.62	0	0	1594184	6636	uSGB_4272	Family	k__Bacteria|p__Firmicutes|c__Clostridia|o__Clostridiales|f__Ruminococcaceae|g__GGB3235|s__GGB3235_SGB4272|t__SGB4272	0.0253639	31	31_1	Bacteria	Firmicutes_A	Clostridia	Oscillospirales	Acutalibacteraceae	Ruminococcus_E	sp900314705	Group_31
s_9002000001512770_38.permissive	98.66	0	0	2106345	38288	uSGB_4272	Family	k__Bacteria|p__Firmicutes|c__Clostridia|o__Clostridiales|f__Ruminococcaceae|g__GGB3235|s__GGB3235_SGB4272|t__SGB4272	0.0248024	31	31_1	Bacteria	Firmicutes_A	Clostridia	Oscillospirales	Acutalibacteraceae	Ruminococcus_E	sp900314705	Group_31
s_9002000001203943_7.strict	97.32	0.34	0	1868367	17857	uSGB_4290	Family	k__Bacteria|p__Firmicutes|c__Clostridia|o__Clostridiales|f__Ruminococcaceae|g__GGB3244|s__GGB3244_SGB4290|t__SGB4290	0.0212568	32	32_2	Bacteria	Firmicutes_A	Clostridia	Oscillospirales	Acutalibacteraceae	Ruminococcus_E	sp003526955	Group_32
s_9002000001231803_34.strict	97.32	0.34	0	1860471	30434	uSGB_4290	Family	k__Bacteria|p__Firmicutes|c__Clostridia|o__Clostridiales|f__Ruminococcaceae|g__GGB3244|s__GGB3244_SGB4290|t__SGB4290	0.0220622	32	32_10	Bacteria	Firmicutes_A	Clostridia	Oscillospirales	Acutalibacteraceae	Ruminococcus_E	sp003526955	Group_32
s_9002000001246252_42.strict	98.66	0.34	0	2223415	56587	uSGB_4290	Family	k__Bacteria|p__Firmicutes|c__Clostridia|o__Clostridiales|f__Ruminococcaceae|g__GGB3244|s__GGB3244_SGB4290|t__SGB4290	0.0218245	32	32_2	Bacteria	Firmicutes_A	Clostridia	Oscillospirales	Acutalibacteraceae	Ruminococcus_E	sp003526955	Group_32
s_9002000001256080_23.permissive	97.32	0.34	0	1923108	51537	uSGB_4290	Family	k__Bacteria|p__Firmicutes|c__Clostridia|o__Clostridiales|f__Ruminococcaceae|g__GGB3244|s__GGB3244_SGB4290|t__SGB4290	0.0208642	32	32_12	Bacteria	Firmicutes_A	Clostridia	Oscillospirales	Acutalibacteraceae	Ruminococcus_E	sp003526955	Group_32
s_9002000001259288_14.strict	91.28	0.34	0	1873720	57365	uSGB_4290	Family	k__Bacteria|p__Firmicutes|c__Clostridia|o__Clostridiales|f__Ruminococcaceae|g__GGB3244|s__GGB3244_SGB4290|t__SGB4290	0.0236562	32	32_8	Bacteria	Firmicutes_A	Clostridia	Oscillospirales	Acutalibacteraceae	Ruminococcus_E	sp003526955	Group_32
s_9002000001261704_6.strict	98.66	0.34	0	2104768	55896	uSGB_4290	Family	k__Bacteria|p__Firmicutes|c__Clostridia|o__Clostridiales|f__Ruminococcaceae|g__GGB3244|s__GGB3244_SGB4290|t__SGB4290	0.0215493	32	32_5	Bacteria	Firmicutes_A	Clostridia	Oscillospirales	Acutalibacteraceae	Ruminococcus_E	sp003526955	Group_32
s_9002000001352980_20.strict	93.9	0.34	0	1683501	7776	uSGB_4290	Family	k__Bacteria|p__Firmicutes|c__Clostridia|o__Clostridiales|f__Ruminococcaceae|g__GGB3244|s__GGB3244_SGB4290|t__SGB4290	0.0237046	32	32_5	Bacteria	Firmicutes_A	Clostridia	Oscillospirales	Acutalibacteraceae	Ruminococcus_E	sp003526955	Group_32
s_9002000001371690_3.permissive	93.96	0.34	0	1925424	30418	uSGB_4290	Family	k__Bacteria|p__Firmicutes|c__Clostridia|o__Clostridiales|f__Ruminococcaceae|g__GGB3244|s__GGB3244_SGB4290|t__SGB4290	0.0224807	32	32_12	Bacteria	Firmicutes_A	Clostridia	Oscillospirales	Acutalibacteraceae	Ruminococcus_E	sp003526955	Group_32
s_9002000001374735_8.permissive	97.32	0.34	0	1991360	27267	uSGB_4290	Family	k__Bacteria|p__Firmicutes|c__Clostridia|o__Clostridiales|f__Ruminococcaceae|g__GGB3244|s__GGB3244_SGB4290|t__SGB4290	0.0216426	32	32_10	Bacteria	Firmicutes_A	Clostridia	Oscillospirales	Acutalibacteraceae	Ruminococcus_E	sp003526955	Group_32
s_9002000001380545_11.strict	98.66	0.34	0	2037740	56522	uSGB_4290	Family	k__Bacteria|p__Firmicutes|c__Clostridia|o__Clostridiales|f__Ruminococcaceae|g__GGB3244|s__GGB3244_SGB4290|t__SGB4290	0.0223251	32	32_6	Bacteria	Firmicutes_A	Clostridia	Oscillospirales	Acutalibacteraceae	Ruminococcus_E	sp003526955	Group_32
s_9002000001380900_19.strict	94.54	0.34	0	1848291	28669	uSGB_4290	Family	k__Bacteria|p__Firmicutes|c__Clostridia|o__Clostridiales|f__Ruminococcaceae|g__GGB3244|s__GGB3244_SGB4290|t__SGB4290	0.0218758	32	32_11	Bacteria	Firmicutes_A	Clostridia	Oscillospirales	Acutalibacteraceae	Ruminococcus_E	sp003526955	Group_32
s_9002000001391070_19.permissive	98.66	0.34	0	2256949	82207	uSGB_4290	Family	k__Bacteria|p__Firmicutes|c__Clostridia|o__Clostridiales|f__Ruminococcaceae|g__GGB3244|s__GGB3244_SGB4290|t__SGB4290	0.0228078	32	32_15	Bacteria	Firmicutes_A	Clostridia	Oscillospirales	Acutalibacteraceae	Ruminococcus_E	sp003526955	Group_32
s_9002000001395539_48.strict	94.63	0.34	0	2039929	79807	uSGB_4290	Family	k__Bacteria|p__Firmicutes|c__Clostridia|o__Clostridiales|f__Ruminococcaceae|g__GGB3244|s__GGB3244_SGB4290|t__SGB4290	0.0221364	32	32_1	Bacteria	Firmicutes_A	Clostridia	Oscillospirales	Acutalibacteraceae	Ruminococcus_E	sp003526955	Group_32
s_9002000001408172_6.strict	97.32	0.34	0	1965937	35666	uSGB_4290	Family	k__Bacteria|p__Firmicutes|c__Clostridia|o__Clostridiales|f__Ruminococcaceae|g__GGB3244|s__GGB3244_SGB4290|t__SGB4290	0.0208995	32	32_12	Bacteria	Firmicutes_A	Clostridia	Oscillospirales	Acutalibacteraceae	Ruminococcus_E	sp003526955	Group_32
s_9002000001421030_30.permissive	97.32	0.34	0	1929507	16710	uSGB_4290	Family	k__Bacteria|p__Firmicutes|c__Clostridia|o__Clostridiales|f__Ruminococcaceae|g__GGB3244|s__GGB3244_SGB4290|t__SGB4290	0.0217734	32	32_9	Bacteria	Firmicutes_A	Clostridia	Oscillospirales	Acutalibacteraceae	Ruminococcus_E	sp003526955	Group_32
s_9002000001429200_13.orig	97.99	0.34	0	1981455	24969	uSGB_4290	Family	k__Bacteria|p__Firmicutes|c__Clostridia|o__Clostridiales|f__Ruminococcaceae|g__GGB3244|s__GGB3244_SGB4290|t__SGB4290	0.0212231	32	32_12	Bacteria	Firmicutes_A	Clostridia	Oscillospirales	Acutalibacteraceae	Ruminococcus_E	sp003526955	Group_32
s_9002000001448688_23.strict	94.94	0.34	0	1657638	13315	uSGB_4290	Family	k__Bacteria|p__Firmicutes|c__Clostridia|o__Clostridiales|f__Ruminococcaceae|g__GGB3244|s__GGB3244_SGB4290|t__SGB4290	0.0228702	32	32_11	Bacteria	Firmicutes_A	Clostridia	Oscillospirales	Acutalibacteraceae	Ruminococcus_E	sp003526955	Group_32
s_9002000001452653_18.strict	96.51	0.34	0	1979601	29533	uSGB_4290	Family	k__Bacteria|p__Firmicutes|c__Clostridia|o__Clostridiales|f__Ruminococcaceae|g__GGB3244|s__GGB3244_SGB4290|t__SGB4290	0.0222036	32	32_16	Bacteria	Firmicutes_A	Clostridia	Oscillospirales	Acutalibacteraceae	Ruminococcus_E	sp003526955	Group_32
s_9002000001454080_21.orig	97.99	1.68	75	2066460	33271	uSGB_4290	Family	k__Bacteria|p__Firmicutes|c__Clostridia|o__Clostridiales|f__Ruminococcaceae|g__GGB3244|s__GGB3244_SGB4290|t__SGB4290	0.0214644	32	32_4	Bacteria	Firmicutes_A	Clostridia	Oscillospirales	Acutalibacteraceae	Ruminococcus_E	sp003526955	Group_32
s_9002000001462195_21.permissive	91.28	0.34	0	2065375	85356	uSGB_4290	Family	k__Bacteria|p__Firmicutes|c__Clostridia|o__Clostridiales|f__Ruminococcaceae|g__GGB3244|s__GGB3244_SGB4290|t__SGB4290	0.0234715	32	32_3	Bacteria	Firmicutes_A	Clostridia	Oscillospirales	Acutalibacteraceae	Ruminococcus_E	sp003526955	Group_32
s_9002000001475729LL_9.permissive	97.99	0.34	0	2058317	23457	uSGB_4290	Family	k__Bacteria|p__Firmicutes|c__Clostridia|o__Clostridiales|f__Ruminococcaceae|g__GGB3244|s__GGB3244_SGB4290|t__SGB4290	0.0220638	32	32_13	Bacteria	Firmicutes_A	Clostridia	Oscillospirales	Acutalibacteraceae	Ruminococcus_E	sp003526955	Group_32
s_9002000001478005ALL_9.strict	93.96	0.34	0	1836398	66491	uSGB_4290	Family	k__Bacteria|p__Firmicutes|c__Clostridia|o__Clostridiales|f__Ruminococcaceae|g__GGB3244|s__GGB3244_SGB4290|t__SGB4290	0.0216429	32	32_14	Bacteria	Firmicutes_A	Clostridia	Oscillospirales	Acutalibacteraceae	Ruminococcus_E	sp003526955	Group_32
s_9002000001485725_7.strict	97.27	0.34	0	1946406	15434	uSGB_4290	Family	k__Bacteria|p__Firmicutes|c__Clostridia|o__Clostridiales|f__Ruminococcaceae|g__GGB3244|s__GGB3244_SGB4290|t__SGB4290	0.0220271	32	32_1	Bacteria	Firmicutes_A	Clostridia	Oscillospirales	Acutalibacteraceae	Ruminococcus_E	sp003526955	Group_32
s_9002000001525624_1.strict	98.66	0.34	0	2208226	72936	uSGB_4290	Family	k__Bacteria|p__Firmicutes|c__Clostridia|o__Clostridiales|f__Ruminococcaceae|g__GGB3244|s__GGB3244_SGB4290|t__SGB4290	0.0228435	32	32_7	Bacteria	Firmicutes_A	Clostridia	Oscillospirales	Acutalibacteraceae	Ruminococcus_E	sp003526955	Group_32
s_9002000001566660_6.permissive	97.32	0.34	0	2108061	83673	uSGB_4290	Family	k__Bacteria|p__Firmicutes|c__Clostridia|o__Clostridiales|f__Ruminococcaceae|g__GGB3244|s__GGB3244_SGB4290|t__SGB4290	0.0218227	32	32_3	Bacteria	Firmicutes_A	Clostridia	Oscillospirales	Acutalibacteraceae	Ruminococcus_E	sp003526955	Group_32
s_9002000001570129_30.permissive	95.17	0.34	0	2030776	54526	uSGB_4290	Family	k__Bacteria|p__Firmicutes|c__Clostridia|o__Clostridiales|f__Ruminococcaceae|g__GGB3244|s__GGB3244_SGB4290|t__SGB4290	0.0220117	32	32_4	Bacteria	Firmicutes_A	Clostridia	Oscillospirales	Acutalibacteraceae	Ruminococcus_E	sp003526955	Group_32
s_9002000001197701_2.strict	97.85	1.01	0	1928555	20933	kSGB_4285	Species	k__Bacteria|p__Firmicutes|c__Clostridia|o__Clostridiales|f__Ruminococcaceae|g__Ruminococcus|s__Ruminococcus_bromii|t__SGB4285	0.0441589	33	33_4	Bacteria	Firmicutes_A	Clostridia	Oscillospirales	Acutalibacteraceae	Ruminococcus_E	bromii	Group_33
s_9002000001214947_21.strict	97.72	0.34	0	1941589	36019	kSGB_4285	Species	k__Bacteria|p__Firmicutes|c__Clostridia|o__Clostridiales|f__Ruminococcaceae|g__Ruminococcus|s__Ruminococcus_bromii|t__SGB4285	0.0287528	33	33_10	Bacteria	Firmicutes_A	Clostridia	Oscillospirales	Acutalibacteraceae	Ruminococcus_E	bromii	Group_33
s_9002000001232168_18.strict	92.51	2.01	66.67	1802499	12297	kSGB_4285	Species	k__Bacteria|p__Firmicutes|c__Clostridia|o__Clostridiales|f__Ruminococcaceae|g__Ruminococcus|s__Ruminococcus_bromii|t__SGB4285	0.0275216	33	33_12	Bacteria	Firmicutes_A	Clostridia	Oscillospirales	Acutalibacteraceae	Ruminococcus_E	bromii	Group_33
s_9002000001232275_12.strict	99.33	1.01	0	1993120	73410	kSGB_4285	Species	k__Bacteria|p__Firmicutes|c__Clostridia|o__Clostridiales|f__Ruminococcaceae|g__Ruminococcus|s__Ruminococcus_bromii|t__SGB4285	0.0273824	33	33_38	Bacteria	Firmicutes_A	Clostridia	Oscillospirales	Acutalibacteraceae	Ruminococcus_E	bromii	Group_33
s_9002000001242988_32.strict	99.33	1.01	0	1940469	70886	kSGB_4285	Species	k__Bacteria|p__Firmicutes|c__Clostridia|o__Clostridiales|f__Ruminococcaceae|g__Ruminococcus|s__Ruminococcus_bromii|t__SGB4285	0.043833	33	33_3	Bacteria	Firmicutes_A	Clostridia	Oscillospirales	Acutalibacteraceae	Ruminococcus_E	bromii	Group_33
s_9002000001244042_25.orig	99.33	1.01	0	1980415	22697	kSGB_4285	Species	k__Bacteria|p__Firmicutes|c__Clostridia|o__Clostridiales|f__Ruminococcaceae|g__Ruminococcus|s__Ruminococcus_bromii|t__SGB4285	0.0271906	33	33_38	Bacteria	Firmicutes_A	Clostridia	Oscillospirales	Acutalibacteraceae	Ruminococcus_E	bromii	Group_33
s_9002000001247124_13.orig	99.33	0.67	0	1910143	72097	kSGB_4285	Species	k__Bacteria|p__Firmicutes|c__Clostridia|o__Clostridiales|f__Ruminococcaceae|g__Ruminococcus|s__Ruminococcus_bromii|t__SGB4285	0.0258235	33	33_34	Bacteria	Firmicutes_A	Clostridia	Oscillospirales	Acutalibacteraceae	Ruminococcus_E	bromii	Group_33
s_9002000001248749_18.permissive	99.33	1.34	0	2028730	59036	kSGB_4285	Species	k__Bacteria|p__Firmicutes|c__Clostridia|o__Clostridiales|f__Ruminococcaceae|g__Ruminococcus|s__Ruminococcus_bromii|t__SGB4285	0.026329	33	33_19	Bacteria	Firmicutes_A	Clostridia	Oscillospirales	Acutalibacteraceae	Ruminococcus_E	bromii	Group_33
s_9002000001251234_24.strict	94.97	1.01	0	1709006	12668	kSGB_4285	Species	k__Bacteria|p__Firmicutes|c__Clostridia|o__Clostridiales|f__Ruminococcaceae|g__Ruminococcus|s__Ruminococcus_bromii|t__SGB4285	0.0448098	33	33_5	Bacteria	Firmicutes_A	Clostridia	Oscillospirales	Acutalibacteraceae	Ruminococcus_E	bromii	Group_33
s_9002000001265472_10.permissive	99.33	1.01	0	1914535	48388	kSGB_4285	Species	k__Bacteria|p__Firmicutes|c__Clostridia|o__Clostridiales|f__Ruminococcaceae|g__Ruminococcus|s__Ruminococcus_bromii|t__SGB4285	0.02639	33	33_43	Bacteria	Firmicutes_A	Clostridia	Oscillospirales	Acutalibacteraceae	Ruminococcus_E	bromii	Group_33
s_9002000001295598_7.permissive	98.32	1.01	0	1870604	41664	kSGB_4285	Species	k__Bacteria|p__Firmicutes|c__Clostridia|o__Clostridiales|f__Ruminococcaceae|g__Ruminococcus|s__Ruminococcus_bromii|t__SGB4285	0.0266688	33	33_38	Bacteria	Firmicutes_A	Clostridia	Oscillospirales	Acutalibacteraceae	Ruminococcus_E	bromii	Group_33
s_9002000001305350_9.orig	95.04	1.51	0	1811576	12178	kSGB_4285	Species	k__Bacteria|p__Firmicutes|c__Clostridia|o__Clostridiales|f__Ruminococcaceae|g__Ruminococcus|s__Ruminococcus_bromii|t__SGB4285	0.0275076	33	33_44	Bacteria	Firmicutes_A	Clostridia	Oscillospirales	Acutalibacteraceae	Ruminococcus_E	bromii	Group_33
s_9002000001316393_29.strict	90.2	0.67	0	1895805	101868	kSGB_4285	Species	k__Bacteria|p__Firmicutes|c__Clostridia|o__Clostridiales|f__Ruminococcaceae|g__Ruminococcus|s__Ruminococcus_bromii|t__SGB4285	0.0301472	33	33_14	Bacteria	Firmicutes_A	Clostridia	Oscillospirales	Acutalibacteraceae	Ruminococcus_E	bromii	Group_33
s_9002000001323502_1.permissive	99.33	1.01	0	2012369	47636	kSGB_4285	Species	k__Bacteria|p__Firmicutes|c__Clostridia|o__Clostridiales|f__Ruminococcaceae|g__Ruminococcus|s__Ruminococcus_bromii|t__SGB4285	0.0267785	33	33_11	Bacteria	Firmicutes_A	Clostridia	Oscillospirales	Acutalibacteraceae	Ruminococcus_E	bromii	Group_33
s_9002000001334186_27.strict	91.28	1.01	0	1828535	28261	kSGB_4285	Species	k__Bacteria|p__Firmicutes|c__Clostridia|o__Clostridiales|f__Ruminococcaceae|g__Ruminococcus|s__Ruminococcus_bromii|t__SGB4285	0.0287035	33	33_15	Bacteria	Firmicutes_A	Clostridia	Oscillospirales	Acutalibacteraceae	Ruminococcus_E	bromii	Group_33
s_9002000001338480_15.permissive	97.99	0.67	0	1987060	30057	kSGB_4285	Species	k__Bacteria|p__Firmicutes|c__Clostridia|o__Clostridiales|f__Ruminococcaceae|g__Ruminococcus|s__Ruminococcus_bromii|t__SGB4285	0.0271727	33	33_31	Bacteria	Firmicutes_A	Clostridia	Oscillospirales	Acutalibacteraceae	Ruminococcus_E	bromii	Group_33
s_9002000001350303_23.permissive	97.99	1.01	0	1844660	14350	kSGB_4285	Species	k__Bacteria|p__Firmicutes|c__Clostridia|o__Clostridiales|f__Ruminococcaceae|g__Ruminococcus|s__Ruminococcus_bromii|t__SGB4285	0.0278693	33	33_33	Bacteria	Firmicutes_A	Clostridia	Oscillospirales	Acutalibacteraceae	Ruminococcus_E	bromii	Group_33
s_9002000001352086_9.permissive	95.7	0.5	50	1803880	13990	kSGB_4285	Species	k__Bacteria|p__Firmicutes|c__Clostridia|o__Clostridiales|f__Ruminococcaceae|g__Ruminococcus|s__Ruminococcus_bromii|t__SGB4285	0.0452951	33	33_8	Bacteria	Firmicutes_A	Clostridia	Oscillospirales	Acutalibacteraceae	Ruminococcus_E	bromii	Group_33
s_9002000001353332_3.permissive	95.13	2.01	0	2016394	11805	kSGB_4285	Species	k__Bacteria|p__Firmicutes|c__Clostridia|o__Clostridiales|f__Ruminococcaceae|g__Ruminococcus|s__Ruminococcus_bromii|t__SGB4285	0.0289027	33	33_40	Bacteria	Firmicutes_A	Clostridia	Oscillospirales	Acutalibacteraceae	Ruminococcus_E	bromii	Group_33
s_9002000001369109_10.strict	90.87	0.67	0	1804968	54296	kSGB_4285	Species	k__Bacteria|p__Firmicutes|c__Clostridia|o__Clostridiales|f__Ruminococcaceae|g__Ruminococcus|s__Ruminococcus_bromii|t__SGB4285	0.0278894	33	33_17	Bacteria	Firmicutes_A	Clostridia	Oscillospirales	Acutalibacteraceae	Ruminococcus_E	bromii	Group_33
s_9002000001375110_25.strict	97.17	0.67	0	1919229	20132	kSGB_4285	Species	k__Bacteria|p__Firmicutes|c__Clostridia|o__Clostridiales|f__Ruminococcaceae|g__Ruminococcus|s__Ruminococcus_bromii|t__SGB4285	0.0267769	33	33_13	Bacteria	Firmicutes_A	Clostridia	Oscillospirales	Acutalibacteraceae	Ruminococcus_E	bromii	Group_33
s_9002000001388285_18.permissive	97.99	1.01	0	1941986	55800	kSGB_4285	Species	k__Bacteria|p__Firmicutes|c__Clostridia|o__Clostridiales|f__Ruminococcaceae|g__Ruminococcus|s__Ruminococcus_bromii|t__SGB4285	0.0265746	33	33_9	Bacteria	Firmicutes_A	Clostridia	Oscillospirales	Acutalibacteraceae	Ruminococcus_E	bromii	Group_33
s_9002000001390280_4.strict	99.33	1.01	0	2076949	205471	kSGB_4285	Species	k__Bacteria|p__Firmicutes|c__Clostridia|o__Clostridiales|f__Ruminococcaceae|g__Ruminococcus|s__Ruminococcus_bromii|t__SGB4285	0.0279279	33	33_38	Bacteria	Firmicutes_A	Clostridia	Oscillospirales	Acutalibacteraceae	Ruminococcus_E	bromii	Group_33
s_9002000001392958_14.permissive	99.33	1.01	0	2013771	32165	kSGB_4285	Species	k__Bacteria|p__Firmicutes|c__Clostridia|o__Clostridiales|f__Ruminococcaceae|g__Ruminococcus|s__Ruminococcus_bromii|t__SGB4285	0.0277506	33	33_36	Bacteria	Firmicutes_A	Clostridia	Oscillospirales	Acutalibacteraceae	Ruminococcus_E	bromii	Group_33
s_9002000001393098_14.permissive	97.32	1.01	0	1791353	24647	kSGB_4285	Species	k__Bacteria|p__Firmicutes|c__Clostridia|o__Clostridiales|f__Ruminococcaceae|g__Ruminococcus|s__Ruminococcus_bromii|t__SGB4285	0.0432348	33	33_2	Bacteria	Firmicutes_A	Clostridia	Oscillospirales	Acutalibacteraceae	Ruminococcus_E	bromii	Group_33
s_9002000001399800_11.permissive	90.2	0.67	0	1849481	66877	kSGB_4285	Species	k__Bacteria|p__Firmicutes|c__Clostridia|o__Clostridiales|f__Ruminococcaceae|g__Ruminococcus|s__Ruminococcus_bromii|t__SGB4285	0.0287614	33	33_20	Bacteria	Firmicutes_A	Clostridia	Oscillospirales	Acutalibacteraceae	Ruminococcus_E	bromii	Group_33
s_9002000001435296_16.strict	97.32	1.01	0	2047797	79931	kSGB_4285	Species	k__Bacteria|p__Firmicutes|c__Clostridia|o__Clostridiales|f__Ruminococcaceae|g__Ruminococcus|s__Ruminococcus_bromii|t__SGB4285	0.0284504	33	33_37	Bacteria	Firmicutes_A	Clostridia	Oscillospirales	Acutalibacteraceae	Ruminococcus_E	bromii	Group_33
s_9002000001439850_20.permissive	91.28	1.01	0	1965418	61604	kSGB_4285	Species	k__Bacteria|p__Firmicutes|c__Clostridia|o__Clostridiales|f__Ruminococcaceae|g__Ruminococcus|s__Ruminococcus_bromii|t__SGB4285	0.0303041	33	33_24	Bacteria	Firmicutes_A	Clostridia	Oscillospirales	Acutalibacteraceae	Ruminococcus_E	bromii	Group_33
s_9002000001445194_23.strict	95.97	1.01	0	1866735	11960	kSGB_4285	Species	k__Bacteria|p__Firmicutes|c__Clostridia|o__Clostridiales|f__Ruminococcaceae|g__Ruminococcus|s__Ruminococcus_bromii|t__SGB4285	0.0277612	33	33_16	Bacteria	Firmicutes_A	Clostridia	Oscillospirales	Acutalibacteraceae	Ruminococcus_E	bromii	Group_33
s_9002000001446502_3.permissive	92.21	1.01	0	1929287	81381	kSGB_4285	Species	k__Bacteria|p__Firmicutes|c__Clostridia|o__Clostridiales|f__Ruminococcaceae|g__Ruminococcus|s__Ruminococcus_bromii|t__SGB4285	0.0299378	33	33_9	Bacteria	Firmicutes_A	Clostridia	Oscillospirales	Acutalibacteraceae	Ruminococcus_E	bromii	Group_33
s_9002000001450040_18.permissive	98.66	1.01	0	1929026	31936	kSGB_4285	Species	k__Bacteria|p__Firmicutes|c__Clostridia|o__Clostridiales|f__Ruminococcaceae|g__Ruminococcus|s__Ruminococcus_bromii|t__SGB4285	0.0445582	33	33_1	Bacteria	Firmicutes_A	Clostridia	Oscillospirales	Acutalibacteraceae	Ruminococcus_E	bromii	Group_33
s_9002000001450980_17.permissive	99.33	0.67	0	1981317	32964	kSGB_4285	Species	k__Bacteria|p__Firmicutes|c__Clostridia|o__Clostridiales|f__Ruminococcaceae|g__Ruminococcus|s__Ruminococcus_bromii|t__SGB4285	0.0272094	33	33_27	Bacteria	Firmicutes_A	Clostridia	Oscillospirales	Acutalibacteraceae	Ruminococcus_E	bromii	Group_33
s_9002000001452386_20.permissive	97.65	1.01	0	1883412	23372	kSGB_4285	Species	k__Bacteria|p__Firmicutes|c__Clostridia|o__Clostridiales|f__Ruminococcaceae|g__Ruminococcus|s__Ruminococcus_bromii|t__SGB4285	0.0273835	33	33_28	Bacteria	Firmicutes_A	Clostridia	Oscillospirales	Acutalibacteraceae	Ruminococcus_E	bromii	Group_33
s_9002000001454910_26.permissive	96.64	1.68	25	1864532	20381	kSGB_4285	Species	k__Bacteria|p__Firmicutes|c__Clostridia|o__Clostridiales|f__Ruminococcaceae|g__Ruminococcus|s__Ruminococcus_bromii|t__SGB4285	0.043625	33	33_2	Bacteria	Firmicutes_A	Clostridia	Oscillospirales	Acutalibacteraceae	Ruminococcus_E	bromii	Group_33
s_9002000001472585_7.permissive	91.67	1.79	50	1734875	11636	kSGB_4285	Species	k__Bacteria|p__Firmicutes|c__Clostridia|o__Clostridiales|f__Ruminococcaceae|g__Ruminococcus|s__Ruminococcus_bromii|t__SGB4285	0.0285867	33	33_21	Bacteria	Firmicutes_A	Clostridia	Oscillospirales	Acutalibacteraceae	Ruminococcus_E	bromii	Group_33
s_9002000001476459_8.strict	94.07	2.68	0	1881427	27523	kSGB_4285	Species	k__Bacteria|p__Firmicutes|c__Clostridia|o__Clostridiales|f__Ruminococcaceae|g__Ruminococcus|s__Ruminococcus_bromii|t__SGB4285	0.0273249	33	33_30	Bacteria	Firmicutes_A	Clostridia	Oscillospirales	Acutalibacteraceae	Ruminococcus_E	bromii	Group_33
s_9002000001476931_14.strict	98.66	0.67	0	2039503	45228	kSGB_4285	Species	k__Bacteria|p__Firmicutes|c__Clostridia|o__Clostridiales|f__Ruminococcaceae|g__Ruminococcus|s__Ruminococcus_bromii|t__SGB4285	0.0280503	33	33_40	Bacteria	Firmicutes_A	Clostridia	Oscillospirales	Acutalibacteraceae	Ruminococcus_E	bromii	Group_33
s_9002000001478776_5.strict	90.48	1.9	50	1753259	11104	kSGB_4285	Species	k__Bacteria|p__Firmicutes|c__Clostridia|o__Clostridiales|f__Ruminococcaceae|g__Ruminococcus|s__Ruminococcus_bromii|t__SGB4285	0.0285343	33	33_35	Bacteria	Firmicutes_A	Clostridia	Oscillospirales	Acutalibacteraceae	Ruminococcus_E	bromii	Group_33
s_9002000001480184LL_15.permissive	91.95	0.67	0	1937306	68163	kSGB_4285	Species	k__Bacteria|p__Firmicutes|c__Clostridia|o__Clostridiales|f__Ruminococcaceae|g__Ruminococcus|s__Ruminococcus_bromii|t__SGB4285	0.0286063	33	33_22	Bacteria	Firmicutes_A	Clostridia	Oscillospirales	Acutalibacteraceae	Ruminococcus_E	bromii	Group_33
s_9002000001487499_9.strict	93.62	1.01	50	1845783	10096	kSGB_4285	Species	k__Bacteria|p__Firmicutes|c__Clostridia|o__Clostridiales|f__Ruminococcaceae|g__Ruminococcus|s__Ruminococcus_bromii|t__SGB4285	0.0279482	33	33_25	Bacteria	Firmicutes_A	Clostridia	Oscillospirales	Acutalibacteraceae	Ruminococcus_E	bromii	Group_33
s_9002000001494617_13.permissive	95.75	0.67	0	1876245	30302	kSGB_4285	Species	k__Bacteria|p__Firmicutes|c__Clostridia|o__Clostridiales|f__Ruminococcaceae|g__Ruminococcus|s__Ruminococcus_bromii|t__SGB4285	0.0268767	33	33_29	Bacteria	Firmicutes_A	Clostridia	Oscillospirales	Acutalibacteraceae	Ruminococcus_E	bromii	Group_33
s_9002000001498948_1.strict	96.64	1.01	0	2129317	85128	kSGB_4285	Species	k__Bacteria|p__Firmicutes|c__Clostridia|o__Clostridiales|f__Ruminococcaceae|g__Ruminococcus|s__Ruminococcus_bromii|t__SGB4285	0.0281667	33	33_18	Bacteria	Firmicutes_A	Clostridia	Oscillospirales	Acutalibacteraceae	Ruminococcus_E	bromii	Group_33
s_9002000001501838_8.strict	99.33	1.01	0	2010267	96343	kSGB_4285	Species	k__Bacteria|p__Firmicutes|c__Clostridia|o__Clostridiales|f__Ruminococcaceae|g__Ruminococcus|s__Ruminococcus_bromii|t__SGB4285	0.0271877	33	33_39	Bacteria	Firmicutes_A	Clostridia	Oscillospirales	Acutalibacteraceae	Ruminococcus_E	bromii	Group_33
s_9002000001501892_13.permissive	96.48	1.85	0	1803942	12560	kSGB_4285	Species	k__Bacteria|p__Firmicutes|c__Clostridia|o__Clostridiales|f__Ruminococcaceae|g__Ruminococcus|s__Ruminococcus_bromii|t__SGB4285	0.0278667	33	33_38	Bacteria	Firmicutes_A	Clostridia	Oscillospirales	Acutalibacteraceae	Ruminococcus_E	bromii	Group_33
s_9002000001503369_12.strict	99.33	1.01	0	2005898	106177	kSGB_4285	Species	k__Bacteria|p__Firmicutes|c__Clostridia|o__Clostridiales|f__Ruminococcaceae|g__Ruminococcus|s__Ruminococcus_bromii|t__SGB4285	0.026695	33	33_42	Bacteria	Firmicutes_A	Clostridia	Oscillospirales	Acutalibacteraceae	Ruminococcus_E	bromii	Group_33
s_9002000001517364_27.permissive	91.95	1.01	0	1766870	51019	kSGB_4285	Species	k__Bacteria|p__Firmicutes|c__Clostridia|o__Clostridiales|f__Ruminococcaceae|g__Ruminococcus|s__Ruminococcus_bromii|t__SGB4285	0.027909	33	33_26	Bacteria	Firmicutes_A	Clostridia	Oscillospirales	Acutalibacteraceae	Ruminococcus_E	bromii	Group_33
s_9002000001527647_27.permissive	97.99	1.01	0	1995839	122095	kSGB_4285	Species	k__Bacteria|p__Firmicutes|c__Clostridia|o__Clostridiales|f__Ruminococcaceae|g__Ruminococcus|s__Ruminococcus_bromii|t__SGB4285	0.0453796	33	33_7	Bacteria	Firmicutes_A	Clostridia	Oscillospirales	Acutalibacteraceae	Ruminococcus_E	bromii	Group_33
s_9002000001554377_33.permissive	97.99	1.01	0	2040244	169641	kSGB_4285	Species	k__Bacteria|p__Firmicutes|c__Clostridia|o__Clostridiales|f__Ruminococcaceae|g__Ruminococcus|s__Ruminococcus_bromii|t__SGB4285	0.0278432	33	33_41	Bacteria	Firmicutes_A	Clostridia	Oscillospirales	Acutalibacteraceae	Ruminococcus_E	bromii	Group_33
s_9002000001554439_27.orig	98.66	0.67	0	1946805	31456	kSGB_4285	Species	k__Bacteria|p__Firmicutes|c__Clostridia|o__Clostridiales|f__Ruminococcaceae|g__Ruminococcus|s__Ruminococcus_bromii|t__SGB4285	0.0266281	33	33_32	Bacteria	Firmicutes_A	Clostridia	Oscillospirales	Acutalibacteraceae	Ruminococcus_E	bromii	Group_33
s_9002000001565405_14.orig	99.33	0.67	0	2183101	31273	kSGB_4285	Species	k__Bacteria|p__Firmicutes|c__Clostridia|o__Clostridiales|f__Ruminococcaceae|g__Ruminococcus|s__Ruminococcus_bromii|t__SGB4285	0.0278245	33	33_24	Bacteria	Firmicutes_A	Clostridia	Oscillospirales	Acutalibacteraceae	Ruminococcus_E	bromii	Group_33
s_9002000001572150_9.orig	99.33	0.67	0	2003154	40436	kSGB_4285	Species	k__Bacteria|p__Firmicutes|c__Clostridia|o__Clostridiales|f__Ruminococcaceae|g__Ruminococcus|s__Ruminococcus_bromii|t__SGB4285	0.0269991	33	33_23	Bacteria	Firmicutes_A	Clostridia	Oscillospirales	Acutalibacteraceae	Ruminococcus_E	bromii	Group_33
s_9002000001577190_35.orig	99.33	1.01	0	1899743	69940	kSGB_4285	Species	k__Bacteria|p__Firmicutes|c__Clostridia|o__Clostridiales|f__Ruminococcaceae|g__Ruminococcus|s__Ruminococcus_bromii|t__SGB4285	0.0439482	33	33_1	Bacteria	Firmicutes_A	Clostridia	Oscillospirales	Acutalibacteraceae	Ruminococcus_E	bromii	Group_33
s_9002000001577850_3.permissive	97.99	0.34	0	1871967	22438	kSGB_4285	Species	k__Bacteria|p__Firmicutes|c__Clostridia|o__Clostridiales|f__Ruminococcaceae|g__Ruminococcus|s__Ruminococcus_bromii|t__SGB4285	0.0447098	33	33_6	Bacteria	Firmicutes_A	Clostridia	Oscillospirales	Acutalibacteraceae	Ruminococcus_E	bromii	Group_33
s_9005000001577950_16.permissive	90.6	0	0	1716493	211302	kSGB_4285	Species	k__Bacteria|p__Firmicutes|c__Clostridia|o__Clostridiales|f__Ruminococcaceae|g__Ruminococcus|s__Ruminococcus_bromii|t__SGB4285	0.0313524	33	33_11	Bacteria	Firmicutes_A	Clostridia	Oscillospirales	Acutalibacteraceae	Ruminococcus_E	bromii	Group_33
s_9002000001282052_8.permissive	98.18	0.9	0	2084766	28838	uSGB_5792	Other	k__Bacteria|p__Proteobacteria|c__CFGB1704|o__OFGB1704|f__FGB1704|g__GGB4258|s__GGB4258_SGB5792|t__SGB5792	0.0195587	34	34_1	Bacteria	Firmicutes_C	Negativicutes	Acidaminococcales	Acidaminococcaceae	Phascolarctobacterium	faecium	Group_34
s_9002000001497216_3.permissive	100	2.1	0	2186685	59153	uSGB_5792	Other	k__Bacteria|p__Proteobacteria|c__CFGB1704|o__OFGB1704|f__FGB1704|g__GGB4258|s__GGB4258_SGB5792|t__SGB5792	0.0181067	34	34_2	Bacteria	Firmicutes_C	Negativicutes	Acidaminococcales	Acidaminococcaceae	Phascolarctobacterium	faecium	Group_34
s_9002000001542350_21.orig	95.58	2.12	16.67	1898074	11571	uSGB_5792	Other	k__Bacteria|p__Proteobacteria|c__CFGB1704|o__OFGB1704|f__FGB1704|g__GGB4258|s__GGB4258_SGB5792|t__SGB5792	0.0215928	34	34_3	Bacteria	Firmicutes_C	Negativicutes	Acidaminococcales	Acidaminococcaceae	Phascolarctobacterium	faecium	Group_34
s_9002000001295079_45.strict	97.6	0.6	0	1670347	46921	uSGB_5785	Other	k__Bacteria|p__Firmicutes|c__CFGB1704|o__OFGB1704|f__FGB1704|g__GGB4256|s__GGB4256_SGB5785|t__SGB5785	0.0323084	35	35_0	Bacteria	Firmicutes_C	Negativicutes	Acidaminococcales	Acidaminococcaceae	CAG-266	sp000436095	Group_35
s_9002000001584779_17.permissive	92.64	1.32	25	1454976	7706	uSGB_5785	Other	k__Bacteria|p__Firmicutes|c__CFGB1704|o__OFGB1704|f__FGB1704|g__GGB4256|s__GGB4256_SGB5785|t__SGB5785	0.121221	36	36_0	Bacteria	Firmicutes_C	Negativicutes	Acidaminococcales	Acidaminococcaceae	CAG-266		Group_36
s_9002000001196698_41.orig	98.6	1.17	0	2774801	18649	uSGB_15369	Other	k__Bacteria|p__Firmicutes|c__CFGB3068|o__OFGB3068|f__FGB3068|g__GGB9758|s__GGB9758_SGB15369|t__SGB15369	0.0242472	37	37_8	Bacteria	Firmicutes_A	Clostridia	Christensenellales	CAG-74	UBA11524	sp000437595	Group_37
s_9002000001200638_15.permissive	98.6	1.17	0	2914123	24384	uSGB_15369	Other	k__Bacteria|p__Firmicutes|c__CFGB3068|o__OFGB3068|f__FGB3068|g__GGB9758|s__GGB9758_SGB15369|t__SGB15369	0.0248175	37	37_12	Bacteria	Firmicutes_A	Clostridia	Christensenellales	CAG-74	UBA11524	sp000437595	Group_37
s_9002000001252044_21.permissive	92.53	0.93	0	2551493	8640	uSGB_15369	Other	k__Bacteria|p__Firmicutes|c__CFGB3068|o__OFGB3068|f__FGB3068|g__GGB9758|s__GGB9758_SGB15369|t__SGB15369	0.0269925	37	37_17	Bacteria	Firmicutes_A	Clostridia	Christensenellales	CAG-74	UBA11524	sp000437595	Group_37
s_9002000001307240_11.strict	95.63	1.86	25	2675884	9261	uSGB_15369	Other	k__Bacteria|p__Firmicutes|c__CFGB3068|o__OFGB3068|f__FGB3068|g__GGB9758|s__GGB9758_SGB15369|t__SGB15369	0.025616	37	37_5	Bacteria	Firmicutes_A	Clostridia	Christensenellales	CAG-74	UBA11524	sp000437595	Group_37
s_9002000001322390_9.strict	90.22	1.63	0	2556294	8321	uSGB_15369	Other	k__Bacteria|p__Firmicutes|c__CFGB3068|o__OFGB3068|f__FGB3068|g__GGB9758|s__GGB9758_SGB15369|t__SGB15369	0.025841	37	37_9	Bacteria	Firmicutes_A	Clostridia	Christensenellales	CAG-74	UBA11524	sp000437595	Group_37
s_9002000001323431_28.strict	97.55	1.17	0	2822316	23137	uSGB_15369	Other	k__Bacteria|p__Firmicutes|c__CFGB3068|o__OFGB3068|f__FGB3068|g__GGB9758|s__GGB9758_SGB15369|t__SGB15369	0.0254553	37	37_1	Bacteria	Firmicutes_A	Clostridia	Christensenellales	CAG-74	UBA11524	sp000437595	Group_37
s_9002000001338416_41.permissive	90.79	1.63	0	2678582	12667	uSGB_15368	Other	k__Bacteria|p__Firmicutes|c__CFGB3068|o__OFGB3068|f__FGB3068|g__GGB9758|s__GGB9758_SGB15368|t__SGB15368	0.0505798	37	37_6	Bacteria	Firmicutes_A	Clostridia	Christensenellales	CAG-74	UBA11524	sp000437595	Group_37
s_9002000001343701_6.strict	95.8	1.17	0	2752770	19330	uSGB_15369	Other	k__Bacteria|p__Firmicutes|c__CFGB3068|o__OFGB3068|f__FGB3068|g__GGB9758|s__GGB9758_SGB15369|t__SGB15369	0.0254876	37	37_14	Bacteria	Firmicutes_A	Clostridia	Christensenellales	CAG-74	UBA11524	sp000437595	Group_37
s_9002000001375110_35.orig	92.66	1.42	0	2515714	7318	uSGB_15369	Other	k__Bacteria|p__Firmicutes|c__CFGB3068|o__OFGB3068|f__FGB3068|g__GGB9758|s__GGB9758_SGB15369|t__SGB15369	0.0261085	37	37_4	Bacteria	Firmicutes_A	Clostridia	Christensenellales	CAG-74	UBA11524	sp000437595	Group_37
s_9002000001388285_14.permissive	96.15	2.56	0	2959321	18428	uSGB_15369	Other	k__Bacteria|p__Firmicutes|c__CFGB3068|o__OFGB3068|f__FGB3068|g__GGB9758|s__GGB9758_SGB15369|t__SGB15369	0.0264098	37	37_13	Bacteria	Firmicutes_A	Clostridia	Christensenellales	CAG-74	UBA11524	sp000437595	Group_37
s_9002000001435151_11.strict	98.6	1.17	0	2902567	21200	uSGB_15369	Other	k__Bacteria|p__Firmicutes|c__CFGB3068|o__OFGB3068|f__FGB3068|g__GGB9758|s__GGB9758_SGB15369|t__SGB15369	0.0254031	37	37_7	Bacteria	Firmicutes_A	Clostridia	Christensenellales	CAG-74	UBA11524	sp000437595	Group_37
s_9002000001438180_4.strict	93.36	0.58	0	2581352	9243	uSGB_15369	Other	k__Bacteria|p__Firmicutes|c__CFGB3068|o__OFGB3068|f__FGB3068|g__GGB9758|s__GGB9758_SGB15369|t__SGB15369	0.0260308	37	37_16	Bacteria	Firmicutes_A	Clostridia	Christensenellales	CAG-74	UBA11524	sp000437595	Group_37
s_9002000001441266_26.strict	95.28	1.52	25	2704136	15434	uSGB_15369	Other	k__Bacteria|p__Firmicutes|c__CFGB3068|o__OFGB3068|f__FGB3068|g__GGB9758|s__GGB9758_SGB15369|t__SGB15369	0.026241	37	37_18	Bacteria	Firmicutes_A	Clostridia	Christensenellales	CAG-74	UBA11524	sp000437595	Group_37
s_9002000001478776_15.strict	98.6	1.17	0	2876063	18610	uSGB_15369	Other	k__Bacteria|p__Firmicutes|c__CFGB3068|o__OFGB3068|f__FGB3068|g__GGB9758|s__GGB9758_SGB15369|t__SGB15369	0.0245381	37	37_10	Bacteria	Firmicutes_A	Clostridia	Christensenellales	CAG-74	UBA11524	sp000437595	Group_37
s_9002000001501892_12.orig	99.3	1.17	0	3237135	51497	uSGB_15369	Other	k__Bacteria|p__Firmicutes|c__CFGB3068|o__OFGB3068|f__FGB3068|g__GGB9758|s__GGB9758_SGB15369|t__SGB15369	0.027196	37	37_2	Bacteria	Firmicutes_A	Clostridia	Christensenellales	CAG-74	UBA11524	sp000437595	Group_37
s_9002000001547000_3.strict	94.17	1.17	0	2728509	13424	uSGB_15369	Other	k__Bacteria|p__Firmicutes|c__CFGB3068|o__OFGB3068|f__FGB3068|g__GGB9758|s__GGB9758_SGB15369|t__SGB15369	0.0247108	37	37_11	Bacteria	Firmicutes_A	Clostridia	Christensenellales	CAG-74	UBA11524	sp000437595	Group_37
s_9002000001577850_11.orig	96.68	1.63	16.67	2695786	13158	uSGB_15369	Other	k__Bacteria|p__Firmicutes|c__CFGB3068|o__OFGB3068|f__FGB3068|g__GGB9758|s__GGB9758_SGB15369|t__SGB15369	0.0253512	37	37_15	Bacteria	Firmicutes_A	Clostridia	Christensenellales	CAG-74	UBA11524	sp000437595	Group_37
s_9002000001589560_2.permissive	94.48	2.68	40	2662366	10185	uSGB_15369	Other	k__Bacteria|p__Firmicutes|c__CFGB3068|o__OFGB3068|f__FGB3068|g__GGB9758|s__GGB9758_SGB15369|t__SGB15369	0.0253143	37	37_3	Bacteria	Firmicutes_A	Clostridia	Christensenellales	CAG-74	UBA11524	sp000437595	Group_37
s_9002000001350528_42.permissive	98.58	0	0	1768125	18704	uSGB_3926	Other	k__Bacteria|p__Firmicutes|c__CFGB1195|o__OFGB1195|f__FGB1195|g__GGB2949|s__GGB2949_SGB3926|t__SGB3926	0.0289364	38	38_1	Bacteria	Firmicutes_A	Clostridia	Peptostreptococcales	Anaerovoracaceae	VUNA01	sp002299625	Group_38
s_9002000001384880_1.permissive	91.99	0.35	100	1597253	11221	uSGB_3926	Other	k__Bacteria|p__Firmicutes|c__CFGB1195|o__OFGB1195|f__FGB1195|g__GGB2949|s__GGB2949_SGB3926|t__SGB3926	0.0298807	38	38_2	Bacteria	Firmicutes_A	Clostridia	Peptostreptococcales	Anaerovoracaceae	VUNA01	sp002299625	Group_38
s_9002000001196698_8.permissive	96.41	1.1	0	2030506	19529	kSGB_5767	Species	k__Bacteria|p__Firmicutes|c__Negativicutes|o__Acidaminococcales|f__Acidaminococcaceae|g__Phascolarctobacterium|s__Phascolarctobacterium_succinatutens|t__SGB5767	0.0405333	39	39_6	Bacteria	Firmicutes_C	Negativicutes	Acidaminococcales	Acidaminococcaceae	Phascolarctobacterium_A	succinatutens	Group_39
s_9002000001200638_1.permissive	96.46	1.2	33.33	1853823	26409	kSGB_5767	Species	k__Bacteria|p__Firmicutes|c__Negativicutes|o__Acidaminococcales|f__Acidaminococcaceae|g__Phascolarctobacterium|s__Phascolarctobacterium_succinatutens|t__SGB5767	0.038021	39	39_1	Bacteria	Firmicutes_C	Negativicutes	Acidaminococcales	Acidaminococcaceae	Phascolarctobacterium_A	succinatutens	Group_39
s_9002000001215917_11.permissive	96.71	1.5	0	2062786	22661	kSGB_5767	Species	k__Bacteria|p__Firmicutes|c__Negativicutes|o__Acidaminococcales|f__Acidaminococcaceae|g__Phascolarctobacterium|s__Phascolarctobacterium_succinatutens|t__SGB5767	0.0400759	39	39_9	Bacteria	Firmicutes_C	Negativicutes	Acidaminococcales	Acidaminococcaceae	Phascolarctobacterium_A	succinatutens	Group_39
s_9002000001249076_33.strict	98.8	1.5	0	2178795	30540	kSGB_5767	Species	k__Bacteria|p__Firmicutes|c__Negativicutes|o__Acidaminococcales|f__Acidaminococcaceae|g__Phascolarctobacterium|s__Phascolarctobacterium_succinatutens|t__SGB5767	0.0401416	39	39_7	Bacteria	Firmicutes_C	Negativicutes	Acidaminococcales	Acidaminococcaceae	Phascolarctobacterium_A	succinatutens	Group_39
s_9002000001276538_12.permissive	94.81	0.9	0	1857451	16398	kSGB_5767	Species	k__Bacteria|p__Firmicutes|c__Negativicutes|o__Acidaminococcales|f__Acidaminococcaceae|g__Phascolarctobacterium|s__Phascolarctobacterium_succinatutens|t__SGB5767	0.0383077	39	39_1	Bacteria	Firmicutes_C	Negativicutes	Acidaminococcales	Acidaminococcaceae	Phascolarctobacterium_A	succinatutens	Group_39
s_9002000001280218_15.strict	93.82	1.8	0	1910839	13154	kSGB_5767	Species	k__Bacteria|p__Firmicutes|c__Negativicutes|o__Acidaminococcales|f__Acidaminococcaceae|g__Phascolarctobacterium|s__Phascolarctobacterium_succinatutens|t__SGB5767	0.0384361	39	39_3	Bacteria	Firmicutes_C	Negativicutes	Acidaminococcales	Acidaminococcaceae	Phascolarctobacterium_A	succinatutens	Group_39
s_9002000001334014_17.strict	100	0.6	0	2060535	66217	kSGB_5767	Species	k__Bacteria|p__Firmicutes|c__Negativicutes|o__Acidaminococcales|f__Acidaminococcaceae|g__Phascolarctobacterium|s__Phascolarctobacterium_succinatutens|t__SGB5767	0.0375906	39	39_1	Bacteria	Firmicutes_C	Negativicutes	Acidaminococcales	Acidaminococcaceae	Phascolarctobacterium_A	succinatutens	Group_39
s_9002000001343701_31.strict	95.01	0.8	0	1887208	26406	kSGB_5767	Species	k__Bacteria|p__Firmicutes|c__Negativicutes|o__Acidaminococcales|f__Acidaminococcaceae|g__Phascolarctobacterium|s__Phascolarctobacterium_succinatutens|t__SGB5767	0.0385115	39	39_1	Bacteria	Firmicutes_C	Negativicutes	Acidaminococcales	Acidaminococcaceae	Phascolarctobacterium_A	succinatutens	Group_39
s_9002000001350528_39.strict	95.51	2.69	16.67	1940613	11378	kSGB_5767	Species	k__Bacteria|p__Firmicutes|c__Negativicutes|o__Acidaminococcales|f__Acidaminococcaceae|g__Phascolarctobacterium|s__Phascolarctobacterium_succinatutens|t__SGB5767	0.0406198	39	39_4	Bacteria	Firmicutes_C	Negativicutes	Acidaminococcales	Acidaminococcaceae	Phascolarctobacterium_A	succinatutens	Group_39
s_9002000001352086_24.permissive	98.8	0.9	0	2143169	58582	kSGB_5767	Species	k__Bacteria|p__Firmicutes|c__Negativicutes|o__Acidaminococcales|f__Acidaminococcaceae|g__Phascolarctobacterium|s__Phascolarctobacterium_succinatutens|t__SGB5767	0.0397575	39	39_8	Bacteria	Firmicutes_C	Negativicutes	Acidaminococcales	Acidaminococcaceae	Phascolarctobacterium_A	succinatutens	Group_39
s_9002000001435151_25.permissive	97.8	0.9	0	2074328	31679	kSGB_5767	Species	k__Bacteria|p__Firmicutes|c__Negativicutes|o__Acidaminococcales|f__Acidaminococcaceae|g__Phascolarctobacterium|s__Phascolarctobacterium_succinatutens|t__SGB5767	0.0402984	39	39_5	Bacteria	Firmicutes_C	Negativicutes	Acidaminococcales	Acidaminococcaceae	Phascolarctobacterium_A	succinatutens	Group_39
s_9002000001454910_25.orig	97.9	1.25	0	1920536	18328	kSGB_5767	Species	k__Bacteria|p__Firmicutes|c__Negativicutes|o__Acidaminococcales|f__Acidaminococcaceae|g__Phascolarctobacterium|s__Phascolarctobacterium_succinatutens|t__SGB5767	0.0378131	39	39_2	Bacteria	Firmicutes_C	Negativicutes	Acidaminococcales	Acidaminococcaceae	Phascolarctobacterium_A	succinatutens	Group_39
s_9002000001462829_18.strict	96.71	1.3	0	2246037	34271	kSGB_5767	Species	k__Bacteria|p__Firmicutes|c__Negativicutes|o__Acidaminococcales|f__Acidaminococcaceae|g__Phascolarctobacterium|s__Phascolarctobacterium_succinatutens|t__SGB5767	0.0410403	39	39_10	Bacteria	Firmicutes_C	Negativicutes	Acidaminococcales	Acidaminococcaceae	Phascolarctobacterium_A	succinatutens	Group_39
s_9002000001478776_30.strict	90.27	0.67	0	1860196	15056	uSGB_15180	Family	k__Bacteria|p__Firmicutes|c__Clostridia|o__Clostridiales|f__Ruminococcaceae|g__GGB9677|s__GGB9677_SGB15180|t__SGB15180	0.0297006	40	40_1	Bacteria	Firmicutes_A	Clostridia	Oscillospirales	Oscillospiraceae	F23-B02	sp001916715	Group_40
s_9002000001479951_25.permissive	90.6	0.67	0	1960742	73850	uSGB_15180	Family	k__Bacteria|p__Firmicutes|c__Clostridia|o__Clostridiales|f__Ruminococcaceae|g__GGB9677|s__GGB9677_SGB15180|t__SGB15180	0.0304521	40	40_2	Bacteria	Firmicutes_A	Clostridia	Oscillospirales	Oscillospiraceae	F23-B02	sp001916715	Group_40
s_9002000001191969_13.permissive	97.99	0	0	1992179	26578	uSGB_15254	Family	k__Bacteria|p__Firmicutes|c__Clostridia|o__Clostridiales|f__Ruminococcaceae|g__GGB9714|s__GGB9714_SGB15254|t__SGB15254	0.0249002	41	41_1	Bacteria	Firmicutes_A	Clostridia	Oscillospirales	Oscillospiraceae	ER4	sp000765235	Group_41
s_9002000001346051_34.strict	92.95	0	0	1843370	25264	uSGB_15254	Family	k__Bacteria|p__Firmicutes|c__Clostridia|o__Clostridiales|f__Ruminococcaceae|g__GGB9714|s__GGB9714_SGB15254|t__SGB15254	0.0261778	41	41_2	Bacteria	Firmicutes_A	Clostridia	Oscillospirales	Oscillospiraceae	ER4	sp000765235	Group_41
s_9002000001377460_30.permissive	93.4	0.22	0	1822504	20923	uSGB_15254	Family	k__Bacteria|p__Firmicutes|c__Clostridia|o__Clostridiales|f__Ruminococcaceae|g__GGB9714|s__GGB9714_SGB15254|t__SGB15254	0.0292145	41	41_4	Bacteria	Firmicutes_A	Clostridia	Oscillospirales	Oscillospiraceae	ER4	sp000765235	Group_41
s_9002000001392958_37.permissive	90.58	0	0	1858755	24724	uSGB_15254	Family	k__Bacteria|p__Firmicutes|c__Clostridia|o__Clostridiales|f__Ruminococcaceae|g__GGB9714|s__GGB9714_SGB15254|t__SGB15254	0.02538	41	41_3	Bacteria	Firmicutes_A	Clostridia	Oscillospirales	Oscillospiraceae	ER4	sp000765235	Group_41
s_9002000001276538_38.strict	91.61	0.67	0	2068170	60224	uSGB_15093	Family	k__Bacteria|p__Firmicutes|c__Clostridia|o__Clostridiales|f__Ruminococcaceae|g__GGB9634|s__GGB9634_SGB15093|t__SGB15093	0.0241977	42	42_0	Bacteria	Firmicutes_A	Clostridia	Oscillospirales	Oscillospiraceae	CAG-83	sp900545585	Group_42
s_9002000001186403_13.permissive	94.46	1.34	50	1968129	10943	uSGB_14861	Other	k__Bacteria|p__Firmicutes|c__CFGB3005|o__OFGB3005|f__FGB3005|g__GGB9468|s__GGB9468_SGB14861|t__SGB14861	0.0258953	43	43_14	Bacteria	Firmicutes_A	Clostridia	Oscillospirales	Acutalibacteraceae	UBA1417	sp003531055	Group_43
s_9002000001196698_13.strict	97.99	0	0	2205717	98572	uSGB_14861	Other	k__Bacteria|p__Firmicutes|c__CFGB3005|o__OFGB3005|f__FGB3005|g__GGB9468|s__GGB9468_SGB14861|t__SGB14861	0.025201	43	43_7	Bacteria	Firmicutes_A	Clostridia	Oscillospirales	Acutalibacteraceae	UBA1417	sp003531055	Group_43
s_9002000001200638_42.permissive	92.4	1.57	0	1973792	21456	uSGB_14861	Other	k__Bacteria|p__Firmicutes|c__CFGB3005|o__OFGB3005|f__FGB3005|g__GGB9468|s__GGB9468_SGB14861|t__SGB14861	0.0245298	43	43_6	Bacteria	Firmicutes_A	Clostridia	Oscillospirales	Acutalibacteraceae	UBA1417	sp003531055	Group_43
s_9002000001225833_22.orig	96.64	0.34	0	2176707	36065	uSGB_14861	Other	k__Bacteria|p__Firmicutes|c__CFGB3005|o__OFGB3005|f__FGB3005|g__GGB9468|s__GGB9468_SGB14861|t__SGB14861	0.0255786	43	43_11	Bacteria	Firmicutes_A	Clostridia	Oscillospirales	Acutalibacteraceae	UBA1417	sp003531055	Group_43
s_9002000001256080_1.permissive	97.99	0	0	2190201	105326	uSGB_14861	Other	k__Bacteria|p__Firmicutes|c__CFGB3005|o__OFGB3005|f__FGB3005|g__GGB9468|s__GGB9468_SGB14861|t__SGB14861	0.0253515	43	43_3	Bacteria	Firmicutes_A	Clostridia	Oscillospirales	Acutalibacteraceae	UBA1417	sp003531055	Group_43
s_9002000001259288_15.strict	94	0.34	100	1966612	18777	uSGB_14861	Other	k__Bacteria|p__Firmicutes|c__CFGB3005|o__OFGB3005|f__FGB3005|g__GGB9468|s__GGB9468_SGB14861|t__SGB14861	0.0258929	43	43_4	Bacteria	Firmicutes_A	Clostridia	Oscillospirales	Acutalibacteraceae	UBA1417	sp003531055	Group_43
s_9002000001277188LL_31.permissive	94.63	1.34	0	1982012	20463	uSGB_3984	Other	k__Bacteria|p__Firmicutes|c__CFGB1226|o__OFGB1226|f__FGB1226|g__GGB2996|s__GGB2996_SGB3984|t__SGB3984	0.26803	43	43_9	Bacteria	Firmicutes_A	Clostridia	Oscillospirales	Acutalibacteraceae	UBA1417	sp003531055	Group_43
s_9002000001294380_18.strict	98.66	0	0	2354363	213695	uSGB_14861	Other	k__Bacteria|p__Firmicutes|c__CFGB3005|o__OFGB3005|f__FGB3005|g__GGB9468|s__GGB9468_SGB14861|t__SGB14861	0.0267681	43	43_10	Bacteria	Firmicutes_A	Clostridia	Oscillospirales	Acutalibacteraceae	UBA1417	sp003531055	Group_43
s_9002000001312311_5.permissive	92.86	2.01	0	2096250	14333	uSGB_14861	Other	k__Bacteria|p__Firmicutes|c__CFGB3005|o__OFGB3005|f__FGB3005|g__GGB9468|s__GGB9468_SGB14861|t__SGB14861	0.02551	43	43_1	Bacteria	Firmicutes_A	Clostridia	Oscillospirales	Acutalibacteraceae	UBA1417	sp003531055	Group_43
s_9002000001338480_5.strict	95.3	0	0	2036719	21996	uSGB_14861	Other	k__Bacteria|p__Firmicutes|c__CFGB3005|o__OFGB3005|f__FGB3005|g__GGB9468|s__GGB9468_SGB14861|t__SGB14861	0.0247255	43	43_9	Bacteria	Firmicutes_A	Clostridia	Oscillospirales	Acutalibacteraceae	UBA1417	sp003531055	Group_43
s_9002000001349142LL_23.strict	92.02	0.67	0	1965279	17048	uSGB_14861	Other	k__Bacteria|p__Firmicutes|c__CFGB3005|o__OFGB3005|f__FGB3005|g__GGB9468|s__GGB9468_SGB14861|t__SGB14861	0.0248536	43	43_12	Bacteria	Firmicutes_A	Clostridia	Oscillospirales	Acutalibacteraceae	UBA1417	sp003531055	Group_43
s_9002000001350528_25.permissive	93.48	2.24	25	1993458	15269	uSGB_14861	Other	k__Bacteria|p__Firmicutes|c__CFGB3005|o__OFGB3005|f__FGB3005|g__GGB9468|s__GGB9468_SGB14861|t__SGB14861	0.0237941	43	43_8	Bacteria	Firmicutes_A	Clostridia	Oscillospirales	Acutalibacteraceae	UBA1417	sp003531055	Group_43
s_9002000001380545_43.permissive	90.02	0	0	2041123	14476	uSGB_14861	Other	k__Bacteria|p__Firmicutes|c__CFGB3005|o__OFGB3005|f__FGB3005|g__GGB9468|s__GGB9468_SGB14861|t__SGB14861	0.0257412	43	43_7	Bacteria	Firmicutes_A	Clostridia	Oscillospirales	Acutalibacteraceae	UBA1417	sp003531055	Group_43
s_9002000001380900_26.permissive	97.99	0	0	2325865	152605	uSGB_14861	Other	k__Bacteria|p__Firmicutes|c__CFGB3005|o__OFGB3005|f__FGB3005|g__GGB9468|s__GGB9468_SGB14861|t__SGB14861	0.0263304	43	43_7	Bacteria	Firmicutes_A	Clostridia	Oscillospirales	Acutalibacteraceae	UBA1417	sp003531055	Group_43
s_9002000001392617_25.strict	96.64	0	0	2295108	195006	uSGB_14861	Other	k__Bacteria|p__Firmicutes|c__CFGB3005|o__OFGB3005|f__FGB3005|g__GGB9468|s__GGB9468_SGB14861|t__SGB14861	0.0259032	43	43_2	Bacteria	Firmicutes_A	Clostridia	Oscillospirales	Acutalibacteraceae	UBA1417	sp003531055	Group_43
s_9002000001403309_22.permissive	93.96	0	0	2017661	37838	uSGB_14861	Other	k__Bacteria|p__Firmicutes|c__CFGB3005|o__OFGB3005|f__FGB3005|g__GGB9468|s__GGB9468_SGB14861|t__SGB14861	0.0249193	43	43_5	Bacteria	Firmicutes_A	Clostridia	Oscillospirales	Acutalibacteraceae	UBA1417	sp003531055	Group_43
s_9002000001407430_2.permissive	93.95	0.89	50	2054329	16613	uSGB_14861	Other	k__Bacteria|p__Firmicutes|c__CFGB3005|o__OFGB3005|f__FGB3005|g__GGB9468|s__GGB9468_SGB14861|t__SGB14861	0.0231711	43	43_8	Bacteria	Firmicutes_A	Clostridia	Oscillospirales	Acutalibacteraceae	UBA1417	sp003531055	Group_43
s_9002000001454080_12.permissive	94.63	0	0	2039018	48616	uSGB_14861	Other	k__Bacteria|p__Firmicutes|c__CFGB3005|o__OFGB3005|f__FGB3005|g__GGB9468|s__GGB9468_SGB14861|t__SGB14861	0.0238059	43	43_8	Bacteria	Firmicutes_A	Clostridia	Oscillospirales	Acutalibacteraceae	UBA1417	sp003531055	Group_43
s_9002000001480326_41.permissive	90.87	0.67	0	1939799	13963	uSGB_14861	Other	k__Bacteria|p__Firmicutes|c__CFGB3005|o__OFGB3005|f__FGB3005|g__GGB9468|s__GGB9468_SGB14861|t__SGB14861	0.0233306	43	43_8	Bacteria	Firmicutes_A	Clostridia	Oscillospirales	Acutalibacteraceae	UBA1417	sp003531055	Group_43
s_9002000001498948_15.permissive	90.6	0.17	0	2072674	86957	uSGB_14861	Other	k__Bacteria|p__Firmicutes|c__CFGB3005|o__OFGB3005|f__FGB3005|g__GGB9468|s__GGB9468_SGB14861|t__SGB14861	0.024197	43	43_8	Bacteria	Firmicutes_A	Clostridia	Oscillospirales	Acutalibacteraceae	UBA1417	sp003531055	Group_43
s_9002000001506333_21.permissive	93.29	0	0	2148393	44475	uSGB_14861	Other	k__Bacteria|p__Firmicutes|c__CFGB3005|o__OFGB3005|f__FGB3005|g__GGB9468|s__GGB9468_SGB14861|t__SGB14861	0.0241371	43	43_13	Bacteria	Firmicutes_A	Clostridia	Oscillospirales	Acutalibacteraceae	UBA1417	sp003531055	Group_43
s_9002000001525624_44.orig	92.87	0	0	1934617	12788	uSGB_14861	Other	k__Bacteria|p__Firmicutes|c__CFGB3005|o__OFGB3005|f__FGB3005|g__GGB9468|s__GGB9468_SGB14861|t__SGB14861	0.0251235	43	43_9	Bacteria	Firmicutes_A	Clostridia	Oscillospirales	Acutalibacteraceae	UBA1417	sp003531055	Group_43
s_9002000001225833_28.permissive	92.38	0	0	2171589	18608	kSGB_15332	Species	k__Bacteria|p__Firmicutes|c__Clostridia|o__Clostridiales|f__Ruminococcaceae|g__Faecalibacterium|s__Faecalibacterium_prausnitzii|t__SGB15332	0.0337539	44	44_4	Bacteria	Firmicutes_A	Clostridia	Oscillospirales	Ruminococcaceae	Faecalibacterium	prausnitzii	Group_44
s_9002000001248749_39.strict	96.68	0.34	0	2166822	39114	kSGB_15332	Species	k__Bacteria|p__Firmicutes|c__Clostridia|o__Clostridiales|f__Ruminococcaceae|g__Faecalibacterium|s__Faecalibacterium_prausnitzii|t__SGB15332	0.0300575	44	44_1	Bacteria	Firmicutes_A	Clostridia	Oscillospirales	Ruminococcaceae	Faecalibacterium	prausnitzii	Group_44
s_9002000001408172_33.permissive	92.1	0	0	2135185	44193	kSGB_15332	Species	k__Bacteria|p__Firmicutes|c__Clostridia|o__Clostridiales|f__Ruminococcaceae|g__Faecalibacterium|s__Faecalibacterium_prausnitzii|t__SGB15332	0.0326154	44	44_3	Bacteria	Firmicutes_A	Clostridia	Oscillospirales	Ruminococcaceae	Faecalibacterium	prausnitzii	Group_44
s_9002000001517364_2.permissive	91.49	0	0	1957202	31456	kSGB_15332	Species	k__Bacteria|p__Firmicutes|c__Clostridia|o__Clostridiales|f__Ruminococcaceae|g__Faecalibacterium|s__Faecalibacterium_prausnitzii|t__SGB15332	0.0310784	44	44_2	Bacteria	Firmicutes_A	Clostridia	Oscillospirales	Ruminococcaceae	Faecalibacterium	prausnitzii	Group_44
s_9002000001227239_5.permissive	98.64	0	0	2165300	41256	kSGB_15342	Species	k__Bacteria|p__Firmicutes|c__Clostridia|o__Clostridiales|f__Ruminococcaceae|g__Faecalibacterium|s__Faecalibacterium_prausnitzii|t__SGB15342	0.0225777	45	45_3	Bacteria	Firmicutes_A	Clostridia	Oscillospirales	Ruminococcaceae	Faecalibacterium	prausnitzii_D	Group_45
s_9002000001228076LL_32.strict	99.32	0	0	2238154	98513	kSGB_15342	Species	k__Bacteria|p__Firmicutes|c__Clostridia|o__Clostridiales|f__Ruminococcaceae|g__Faecalibacterium|s__Faecalibacterium_prausnitzii|t__SGB15342	0.0220313	45	45_1	Bacteria	Firmicutes_A	Clostridia	Oscillospirales	Ruminococcaceae	Faecalibacterium	prausnitzii_D	Group_45
s_9002000001338668_8.permissive	94.55	0	0	2216428	32798	kSGB_15342	Species	k__Bacteria|p__Firmicutes|c__Clostridia|o__Clostridiales|f__Ruminococcaceae|g__Faecalibacterium|s__Faecalibacterium_prausnitzii|t__SGB15342	0.0223873	45	45_2	Bacteria	Firmicutes_A	Clostridia	Oscillospirales	Ruminococcaceae	Faecalibacterium	prausnitzii_D	Group_45
s_9002000001341879_13.strict	95.9	0	0	2303658	34090	kSGB_15342	Species	k__Bacteria|p__Firmicutes|c__Clostridia|o__Clostridiales|f__Ruminococcaceae|g__Faecalibacterium|s__Faecalibacterium_prausnitzii|t__SGB15342	0.0231607	45	45_4	Bacteria	Firmicutes_A	Clostridia	Oscillospirales	Ruminococcaceae	Faecalibacterium	prausnitzii_D	Group_45
s_9002000001227800_2.strict	97.64	0.34	100	2218189	29219	kSGB_15339	Species	k__Bacteria|p__Firmicutes|c__Clostridia|o__Clostridiales|f__Ruminococcaceae|g__Faecalibacterium|s__Faecalibacterium_prausnitzii|t__SGB15339	0.0212268	46	46_0	Bacteria	Firmicutes_A	Clostridia	Oscillospirales	Ruminococcaceae	Faecalibacterium	prausnitzii_F	Group_46
s_9002000001271970_17.permissive	93.39	0	0	2081896	31439	kSGB_15318	Species	k__Bacteria|p__Firmicutes|c__Clostridia|o__Clostridiales|f__Ruminococcaceae|g__Faecalibacterium|s__Faecalibacterium_prausnitzii|t__SGB15318	0.0279937	47	47_1	Bacteria	Firmicutes_A	Clostridia	Oscillospirales	Ruminococcaceae	Faecalibacterium	prausnitzii_C	Group_47
s_9002000001310371LL_20.permissive	92.95	0	0	2130253	46741	kSGB_15318	Species	k__Bacteria|p__Firmicutes|c__Clostridia|o__Clostridiales|f__Ruminococcaceae|g__Faecalibacterium|s__Faecalibacterium_prausnitzii|t__SGB15318	0.0277561	47	47_1	Bacteria	Firmicutes_A	Clostridia	Oscillospirales	Ruminococcaceae	Faecalibacterium	prausnitzii_C	Group_47
s_9002000001390280_32.permissive	93.19	0	0	2090855	43547	kSGB_15318	Species	k__Bacteria|p__Firmicutes|c__Clostridia|o__Clostridiales|f__Ruminococcaceae|g__Faecalibacterium|s__Faecalibacterium_prausnitzii|t__SGB15318	0.0295902	47	47_6	Bacteria	Firmicutes_A	Clostridia	Oscillospirales	Ruminococcaceae	Faecalibacterium	prausnitzii_C	Group_47
s_9002000001401430_9.strict	95.21	1.02	50	2047256	32410	kSGB_15318	Species	k__Bacteria|p__Firmicutes|c__Clostridia|o__Clostridiales|f__Ruminococcaceae|g__Faecalibacterium|s__Faecalibacterium_prausnitzii|t__SGB15318	0.0281165	47	47_2	Bacteria	Firmicutes_A	Clostridia	Oscillospirales	Ruminococcaceae	Faecalibacterium	prausnitzii_C	Group_47
s_9002000001445425_31.permissive	94.67	0	0	1963934	44174	kSGB_15318	Species	k__Bacteria|p__Firmicutes|c__Clostridia|o__Clostridiales|f__Ruminococcaceae|g__Faecalibacterium|s__Faecalibacterium_prausnitzii|t__SGB15318	0.0283153	47	47_4	Bacteria	Firmicutes_A	Clostridia	Oscillospirales	Ruminococcaceae	Faecalibacterium	prausnitzii_C	Group_47
s_9002000001475729LL_15.orig	92.7	0	0	1996632	13079	kSGB_15318	Species	k__Bacteria|p__Firmicutes|c__Clostridia|o__Clostridiales|f__Ruminococcaceae|g__Faecalibacterium|s__Faecalibacterium_prausnitzii|t__SGB15318	0.0278988	47	47_7	Bacteria	Firmicutes_A	Clostridia	Oscillospirales	Ruminococcaceae	Faecalibacterium	prausnitzii_C	Group_47
s_9002000001480326_6.permissive	95.14	0.34	0	2143720	32822	kSGB_15318	Species	k__Bacteria|p__Firmicutes|c__Clostridia|o__Clostridiales|f__Ruminococcaceae|g__Faecalibacterium|s__Faecalibacterium_prausnitzii|t__SGB15318	0.0291838	47	47_5	Bacteria	Firmicutes_A	Clostridia	Oscillospirales	Ruminococcaceae	Faecalibacterium	prausnitzii_C	Group_47
s_9002000001515593_10.strict	90.42	0	0	2003407	37270	kSGB_15318	Species	k__Bacteria|p__Firmicutes|c__Clostridia|o__Clostridiales|f__Ruminococcaceae|g__Faecalibacterium|s__Faecalibacterium_prausnitzii|t__SGB15318	0.0286726	47	47_3	Bacteria	Firmicutes_A	Clostridia	Oscillospirales	Ruminococcaceae	Faecalibacterium	prausnitzii_C	Group_47
s_9002000001265472_32.permissive	93.28	0	0	2038330	46779	kSGB_15322	Species	k__Bacteria|p__Firmicutes|c__Clostridia|o__Clostridiales|f__Ruminococcaceae|g__Faecalibacterium|s__Faecalibacterium_prausnitzii|t__SGB15322	0.0197959	48	48_1	Bacteria	Firmicutes_A	Clostridia	Oscillospirales	Ruminococcaceae	Faecalibacterium	prausnitzii_H	Group_48
s_9002000001351641_10.strict	96.25	0	0	1891389	45928	kSGB_15322	Species	k__Bacteria|p__Firmicutes|c__Clostridia|o__Clostridiales|f__Ruminococcaceae|g__Faecalibacterium|s__Faecalibacterium_prausnitzii|t__SGB15322	0.0214179	48	48_2	Bacteria	Firmicutes_A	Clostridia	Oscillospirales	Ruminococcaceae	Faecalibacterium	prausnitzii_H	Group_48
s_9002000001386478_18.permissive	94.91	0	0	2163026	34526	kSGB_15322	Species	k__Bacteria|p__Firmicutes|c__Clostridia|o__Clostridiales|f__Ruminococcaceae|g__Faecalibacterium|s__Faecalibacterium_prausnitzii|t__SGB15322	0.0206817	48	48_1	Bacteria	Firmicutes_A	Clostridia	Oscillospirales	Ruminococcaceae	Faecalibacterium	prausnitzii_H	Group_48
s_9002000001172112_13.permissive	93.45	0	0	2053691	36122	kSGB_15323	Species	k__Bacteria|p__Firmicutes|c__Clostridia|o__Clostridiales|f__Ruminococcaceae|g__Faecalibacterium|s__Faecalibacterium_prausnitzii|t__SGB15323	0.0270156	49	49_1	Bacteria	Firmicutes_A	Clostridia	Oscillospirales	Ruminococcaceae	Faecalibacterium	prausnitzii_E	Group_49
s_9002000001178386_22.permissive	92.29	0.68	0	2075855	49027	kSGB_15323	Species	k__Bacteria|p__Firmicutes|c__Clostridia|o__Clostridiales|f__Ruminococcaceae|g__Faecalibacterium|s__Faecalibacterium_prausnitzii|t__SGB15323	0.0286723	49	49_2	Bacteria	Firmicutes_A	Clostridia	Oscillospirales	Ruminococcaceae	Faecalibacterium	prausnitzii_E	Group_49
s_9002000001433400_18.permissive	90.79	1.59	33.33	1932216	9540	kSGB_15323	Species	k__Bacteria|p__Firmicutes|c__Clostridia|o__Clostridiales|f__Ruminococcaceae|g__Faecalibacterium|s__Faecalibacterium_prausnitzii|t__SGB15323	0.0283118	49	49_3	Bacteria	Firmicutes_A	Clostridia	Oscillospirales	Ruminococcaceae	Faecalibacterium	prausnitzii_E	Group_49
s_9002000001228076LL_33.strict	96.48	0	0	2082968	51039	kSGB_15316	Species	k__Bacteria|p__Firmicutes|c__Clostridia|o__Clostridiales|f__Ruminococcaceae|g__Faecalibacterium|s__Faecalibacterium_prausnitzii|t__SGB15316	0.0281236	50	50_0	Bacteria	Firmicutes_A	Clostridia	Oscillospirales	Ruminococcaceae	Faecalibacterium	prausnitzii_G	Group_50
s_2009000001589950_11.strict	91.24	0.68	0	2384576	12585	uSGB_15286	Family	k__Bacteria|p__Firmicutes|c__Clostridia|o__Clostridiales|f__Ruminococcaceae|g__GGB9728|s__GGB9728_SGB15286|t__SGB15286	0.0199823	51	51_23	Bacteria	Firmicutes_A	Clostridia	Oscillospirales	Ruminococcaceae	Gemmiger	qucibialis	Group_51
s_9002000001172112_30.strict	94.31	0.68	0	2112218	13337	uSGB_15286	Family	k__Bacteria|p__Firmicutes|c__Clostridia|o__Clostridiales|f__Ruminococcaceae|g__GGB9728|s__GGB9728_SGB15286|t__SGB15286	0.0183313	51	51_39	Bacteria	Firmicutes_A	Clostridia	Oscillospirales	Ruminococcaceae	Gemmiger	qucibialis	Group_51
s_9002000001178386_31.strict	90.25	0.68	0	2095478	12133	uSGB_15286	Family	k__Bacteria|p__Firmicutes|c__Clostridia|o__Clostridiales|f__Ruminococcaceae|g__GGB9728|s__GGB9728_SGB15286|t__SGB15286	0.0177645	51	51_23	Bacteria	Firmicutes_A	Clostridia	Oscillospirales	Ruminococcaceae	Gemmiger	qucibialis	Group_51
s_9002000001203943_14.permissive	94.73	0.68	0	2095234	11219	uSGB_15286	Family	k__Bacteria|p__Firmicutes|c__Clostridia|o__Clostridiales|f__Ruminococcaceae|g__GGB9728|s__GGB9728_SGB15286|t__SGB15286	0.0198308	51	51_6	Bacteria	Firmicutes_A	Clostridia	Oscillospirales	Ruminococcaceae	Gemmiger	qucibialis	Group_51
s_9002000001208627_6.permissive	91.27	0.68	0	2352099	9509	uSGB_15286	Family	k__Bacteria|p__Firmicutes|c__Clostridia|o__Clostridiales|f__Ruminococcaceae|g__GGB9728|s__GGB9728_SGB15286|t__SGB15286	0.0187075	51	51_36	Bacteria	Firmicutes_A	Clostridia	Oscillospirales	Ruminococcaceae	Gemmiger	qucibialis	Group_51
s_9002000001214562_16.permissive	98.27	0.68	0	2669905	12867	uSGB_15286	Family	k__Bacteria|p__Firmicutes|c__Clostridia|o__Clostridiales|f__Ruminococcaceae|g__GGB9728|s__GGB9728_SGB15286|t__SGB15286	0.0200847	51	51_27	Bacteria	Firmicutes_A	Clostridia	Oscillospirales	Ruminococcaceae	Gemmiger	qucibialis	Group_51
s_9002000001226278LL_12.strict	93.73	0.91	0	2048498	11491	uSGB_15286	Family	k__Bacteria|p__Firmicutes|c__Clostridia|o__Clostridiales|f__Ruminococcaceae|g__GGB9728|s__GGB9728_SGB15286|t__SGB15286	0.0171116	51	51_31	Bacteria	Firmicutes_A	Clostridia	Oscillospirales	Ruminococcaceae	Gemmiger	qucibialis	Group_51
s_9002000001231803_33.strict	95.24	0.68	0	2218828	11623	uSGB_15286	Family	k__Bacteria|p__Firmicutes|c__Clostridia|o__Clostridiales|f__Ruminococcaceae|g__GGB9728|s__GGB9728_SGB15286|t__SGB15286	0.018368	51	51_31	Bacteria	Firmicutes_A	Clostridia	Oscillospirales	Ruminococcaceae	Gemmiger	qucibialis	Group_51
s_9002000001233352_37.strict	95.01	0.68	0	2134927	8526	uSGB_15286	Family	k__Bacteria|p__Firmicutes|c__Clostridia|o__Clostridiales|f__Ruminococcaceae|g__GGB9728|s__GGB9728_SGB15286|t__SGB15286	0.0165011	51	51_31	Bacteria	Firmicutes_A	Clostridia	Oscillospirales	Ruminococcaceae	Gemmiger	qucibialis	Group_51
s_9002000001233610_9.permissive	94.56	0.68	0	2158383	11332	uSGB_15286	Family	k__Bacteria|p__Firmicutes|c__Clostridia|o__Clostridiales|f__Ruminococcaceae|g__GGB9728|s__GGB9728_SGB15286|t__SGB15286	0.0180138	51	51_51	Bacteria	Firmicutes_A	Clostridia	Oscillospirales	Ruminococcaceae	Gemmiger	qucibialis	Group_51
s_9002000001244042_27.permissive	93.66	1.7	0	2073336	7815	uSGB_15286	Family	k__Bacteria|p__Firmicutes|c__Clostridia|o__Clostridiales|f__Ruminococcaceae|g__GGB9728|s__GGB9728_SGB15286|t__SGB15286	0.0184753	51	51_10	Bacteria	Firmicutes_A	Clostridia	Oscillospirales	Ruminococcaceae	Gemmiger	qucibialis	Group_51
s_9002000001246252_36.strict	91.94	0	0	2044243	11614	uSGB_15286	Family	k__Bacteria|p__Firmicutes|c__Clostridia|o__Clostridiales|f__Ruminococcaceae|g__GGB9728|s__GGB9728_SGB15286|t__SGB15286	0.0185005	51	51_19	Bacteria	Firmicutes_A	Clostridia	Oscillospirales	Ruminococcaceae	Gemmiger	qucibialis	Group_51
s_9002000001252044_13.orig	91.95	0.68	0	2273035	9499	uSGB_15286	Family	k__Bacteria|p__Firmicutes|c__Clostridia|o__Clostridiales|f__Ruminococcaceae|g__GGB9728|s__GGB9728_SGB15286|t__SGB15286	0.0181563	51	51_21	Bacteria	Firmicutes_A	Clostridia	Oscillospirales	Ruminococcaceae	Gemmiger	qucibialis	Group_51
s_9002000001253168_11.permissive	99.32	0.68	0	2656191	13918	uSGB_15286	Family	k__Bacteria|p__Firmicutes|c__Clostridia|o__Clostridiales|f__Ruminococcaceae|g__GGB9728|s__GGB9728_SGB15286|t__SGB15286	0.0188012	51	51_31	Bacteria	Firmicutes_A	Clostridia	Oscillospirales	Ruminococcaceae	Gemmiger	qucibialis	Group_51
s_9002000001256080_7.strict	96.6	0.85	0	2387807	12791	uSGB_15286	Family	k__Bacteria|p__Firmicutes|c__Clostridia|o__Clostridiales|f__Ruminococcaceae|g__GGB9728|s__GGB9728_SGB15286|t__SGB15286	0.0171904	51	51_41	Bacteria	Firmicutes_A	Clostridia	Oscillospirales	Ruminococcaceae	Gemmiger	qucibialis	Group_51
s_9002000001264644_2.strict	92.29	0.68	0	2256096	8768	uSGB_15286	Family	k__Bacteria|p__Firmicutes|c__Clostridia|o__Clostridiales|f__Ruminococcaceae|g__GGB9728|s__GGB9728_SGB15286|t__SGB15286	0.0182736	51	51_3	Bacteria	Firmicutes_A	Clostridia	Oscillospirales	Ruminococcaceae	Gemmiger	qucibialis	Group_51
s_9002000001274506_33.permissive	91.84	0.68	0	2240732	13441	uSGB_15286	Family	k__Bacteria|p__Firmicutes|c__Clostridia|o__Clostridiales|f__Ruminococcaceae|g__GGB9728|s__GGB9728_SGB15286|t__SGB15286	0.0182178	51	51_49	Bacteria	Firmicutes_A	Clostridia	Oscillospirales	Ruminococcaceae	Gemmiger	qucibialis	Group_51
s_9002000001276538_6.permissive	95.68	0.68	0	2277666	14764	uSGB_15286	Family	k__Bacteria|p__Firmicutes|c__Clostridia|o__Clostridiales|f__Ruminococcaceae|g__GGB9728|s__GGB9728_SGB15286|t__SGB15286	0.0172475	51	51_7	Bacteria	Firmicutes_A	Clostridia	Oscillospirales	Ruminococcaceae	Gemmiger	qucibialis	Group_51
s_9002000001277357_14.permissive	93.47	0.68	0	2175123	12186	uSGB_15286	Family	k__Bacteria|p__Firmicutes|c__Clostridia|o__Clostridiales|f__Ruminococcaceae|g__GGB9728|s__GGB9728_SGB15286|t__SGB15286	0.0173959	51	51_14	Bacteria	Firmicutes_A	Clostridia	Oscillospirales	Ruminococcaceae	Gemmiger	qucibialis	Group_51
s_9002000001278828_6.strict	97.34	0.68	0	2662232	13009	uSGB_15286	Family	k__Bacteria|p__Firmicutes|c__Clostridia|o__Clostridiales|f__Ruminococcaceae|g__GGB9728|s__GGB9728_SGB15286|t__SGB15286	0.0203173	51	51_45	Bacteria	Firmicutes_A	Clostridia	Oscillospirales	Ruminococcaceae	Gemmiger	qucibialis	Group_51
s_9002000001282052_41.permissive	92.18	0.68	0	1984106	10198	uSGB_15286	Family	k__Bacteria|p__Firmicutes|c__Clostridia|o__Clostridiales|f__Ruminococcaceae|g__GGB9728|s__GGB9728_SGB15286|t__SGB15286	0.0190005	51	51_15	Bacteria	Firmicutes_A	Clostridia	Oscillospirales	Ruminococcaceae	Gemmiger	qucibialis	Group_51
s_9002000001285887_24.strict	97.62	0.68	0	2314901	13939	uSGB_15286	Family	k__Bacteria|p__Firmicutes|c__Clostridia|o__Clostridiales|f__Ruminococcaceae|g__GGB9728|s__GGB9728_SGB15286|t__SGB15286	0.0170878	51	51_32	Bacteria	Firmicutes_A	Clostridia	Oscillospirales	Ruminococcaceae	Gemmiger	qucibialis	Group_51
s_9002000001296209_30.strict	97.03	0.68	0	2240129	12682	uSGB_15286	Family	k__Bacteria|p__Firmicutes|c__Clostridia|o__Clostridiales|f__Ruminococcaceae|g__GGB9728|s__GGB9728_SGB15286|t__SGB15286	0.0171113	51	51_25	Bacteria	Firmicutes_A	Clostridia	Oscillospirales	Ruminococcaceae	Gemmiger	qucibialis	Group_51
s_9002000001296521_18.strict	93.54	0.68	0	2265364	13389	uSGB_15290	Family	k__Bacteria|p__Firmicutes|c__Clostridia|o__Clostridiales|f__Ruminococcaceae|g__GGB9730|s__GGB9730_SGB15290|t__SGB15290	0.185646	51	51_50	Bacteria	Firmicutes_A	Clostridia	Oscillospirales	Ruminococcaceae	Gemmiger	qucibialis	Group_51
s_9002000001301926_19.strict	91.16	1.36	0	2214587	11902	uSGB_15286	Family	k__Bacteria|p__Firmicutes|c__Clostridia|o__Clostridiales|f__Ruminococcaceae|g__GGB9728|s__GGB9728_SGB15286|t__SGB15286	0.0179197	51	51_44	Bacteria	Firmicutes_A	Clostridia	Oscillospirales	Ruminococcaceae	Gemmiger	qucibialis	Group_51
s_9002000001338013_8.permissive	94.66	0.68	0	2458047	11961	uSGB_15286	Family	k__Bacteria|p__Firmicutes|c__Clostridia|o__Clostridiales|f__Ruminococcaceae|g__GGB9728|s__GGB9728_SGB15286|t__SGB15286	0.0181882	51	51_33	Bacteria	Firmicutes_A	Clostridia	Oscillospirales	Ruminococcaceae	Gemmiger	qucibialis	Group_51
s_9002000001338480_18.permissive	93.2	0.68	0	2221887	14504	uSGB_15286	Family	k__Bacteria|p__Firmicutes|c__Clostridia|o__Clostridiales|f__Ruminococcaceae|g__GGB9728|s__GGB9728_SGB15286|t__SGB15286	0.0181513	51	51_24	Bacteria	Firmicutes_A	Clostridia	Oscillospirales	Ruminococcaceae	Gemmiger	qucibialis	Group_51
s_9002000001346051_20.strict	95.92	0.68	0	2226382	12481	uSGB_15290	Family	k__Bacteria|p__Firmicutes|c__Clostridia|o__Clostridiales|f__Ruminococcaceae|g__GGB9730|s__GGB9730_SGB15290|t__SGB15290	0.180769	51	51_19	Bacteria	Firmicutes_A	Clostridia	Oscillospirales	Ruminococcaceae	Gemmiger	qucibialis	Group_51
s_9002000001359819_8.strict	98.64	0.68	0	2426647	11204	uSGB_15286	Family	k__Bacteria|p__Firmicutes|c__Clostridia|o__Clostridiales|f__Ruminococcaceae|g__GGB9728|s__GGB9728_SGB15286|t__SGB15286	0.0173527	51	51_33	Bacteria	Firmicutes_A	Clostridia	Oscillospirales	Ruminococcaceae	Gemmiger	qucibialis	Group_51
s_9002000001361192_4.strict	93.88	0.68	0	2250877	13035	uSGB_15286	Family	k__Bacteria|p__Firmicutes|c__Clostridia|o__Clostridiales|f__Ruminococcaceae|g__GGB9728|s__GGB9728_SGB15286|t__SGB15286	0.0179332	51	51_28	Bacteria	Firmicutes_A	Clostridia	Oscillospirales	Ruminococcaceae	Gemmiger	qucibialis	Group_51
s_9002000001361675_14.permissive	93.31	0.68	0	2216210	11436	uSGB_15286	Family	k__Bacteria|p__Firmicutes|c__Clostridia|o__Clostridiales|f__Ruminococcaceae|g__GGB9728|s__GGB9728_SGB15286|t__SGB15286	0.0178505	51	51_35	Bacteria	Firmicutes_A	Clostridia	Oscillospirales	Ruminococcaceae	Gemmiger	qucibialis	Group_51
s_9002000001372130_40.permissive	91.41	0.68	0	2137248	7819	uSGB_15286	Family	k__Bacteria|p__Firmicutes|c__Clostridia|o__Clostridiales|f__Ruminococcaceae|g__GGB9728|s__GGB9728_SGB15286|t__SGB15286	0.0186481	51	51_8	Bacteria	Firmicutes_A	Clostridia	Oscillospirales	Ruminococcaceae	Gemmiger	qucibialis	Group_51
s_9002000001374735_19.strict	90.71	1.36	0	1987826	9511	uSGB_15286	Family	k__Bacteria|p__Firmicutes|c__Clostridia|o__Clostridiales|f__Ruminococcaceae|g__GGB9728|s__GGB9728_SGB15286|t__SGB15286	0.0193577	51	51_53	Bacteria	Firmicutes_A	Clostridia	Oscillospirales	Ruminococcaceae	Gemmiger	qucibialis	Group_51
s_9002000001375110_12.strict	90.14	0.68	0	2116524	8805	uSGB_15286	Family	k__Bacteria|p__Firmicutes|c__Clostridia|o__Clostridiales|f__Ruminococcaceae|g__GGB9728|s__GGB9728_SGB15286|t__SGB15286	0.0182806	51	51_52	Bacteria	Firmicutes_A	Clostridia	Oscillospirales	Ruminococcaceae	Gemmiger	qucibialis	Group_51
s_9002000001380545_1.strict	93.2	0.68	0	2062651	9065	uSGB_15286	Family	k__Bacteria|p__Firmicutes|c__Clostridia|o__Clostridiales|f__Ruminococcaceae|g__GGB9728|s__GGB9728_SGB15286|t__SGB15286	0.0176183	51	51_29	Bacteria	Firmicutes_A	Clostridia	Oscillospirales	Ruminococcaceae	Gemmiger	qucibialis	Group_51
s_9002000001380900_4.strict	97.58	0.68	0	2213630	13768	uSGB_15286	Family	k__Bacteria|p__Firmicutes|c__Clostridia|o__Clostridiales|f__Ruminococcaceae|g__GGB9728|s__GGB9728_SGB15286|t__SGB15286	0.0181076	51	51_5	Bacteria	Firmicutes_A	Clostridia	Oscillospirales	Ruminococcaceae	Gemmiger	qucibialis	Group_51
s_9002000001384880_11.strict	94.22	0.68	0	2171121	14148	uSGB_15286	Family	k__Bacteria|p__Firmicutes|c__Clostridia|o__Clostridiales|f__Ruminococcaceae|g__GGB9728|s__GGB9728_SGB15286|t__SGB15286	0.0169769	51	51_43	Bacteria	Firmicutes_A	Clostridia	Oscillospirales	Ruminococcaceae	Gemmiger	qucibialis	Group_51
s_9002000001385621_12.strict	97.96	0.68	0	2447396	16416	uSGB_15289	Family	k__Bacteria|p__Firmicutes|c__Clostridia|o__Clostridiales|f__Ruminococcaceae|g__GGB9729|s__GGB9729_SGB15289|t__SGB15289	0.16437	51	51_1	Bacteria	Firmicutes_A	Clostridia	Oscillospirales	Ruminococcaceae	Gemmiger	qucibialis	Group_51
s_9002000001390345_3.strict	94.9	0.68	0	2198576	11729	uSGB_15286	Family	k__Bacteria|p__Firmicutes|c__Clostridia|o__Clostridiales|f__Ruminococcaceae|g__GGB9728|s__GGB9728_SGB15286|t__SGB15286	0.0191144	51	51_38	Bacteria	Firmicutes_A	Clostridia	Oscillospirales	Ruminococcaceae	Gemmiger	qucibialis	Group_51
s_9002000001394021_30.strict	95.24	0.68	0	2176580	12070	uSGB_15286	Family	k__Bacteria|p__Firmicutes|c__Clostridia|o__Clostridiales|f__Ruminococcaceae|g__GGB9728|s__GGB9728_SGB15286|t__SGB15286	0.018402	51	51_4	Bacteria	Firmicutes_A	Clostridia	Oscillospirales	Ruminococcaceae	Gemmiger	qucibialis	Group_51
s_9002000001395260_1.strict	95.58	0.68	0	2305888	12298	uSGB_15286	Family	k__Bacteria|p__Firmicutes|c__Clostridia|o__Clostridiales|f__Ruminococcaceae|g__GGB9728|s__GGB9728_SGB15286|t__SGB15286	0.0197833	51	51_19	Bacteria	Firmicutes_A	Clostridia	Oscillospirales	Ruminococcaceae	Gemmiger	qucibialis	Group_51
s_9002000001400933_6.strict	90.88	0.68	0	2086597	11690	uSGB_15290	Family	k__Bacteria|p__Firmicutes|c__Clostridia|o__Clostridiales|f__Ruminococcaceae|g__GGB9730|s__GGB9730_SGB15290|t__SGB15290	0.189125	51	51_31	Bacteria	Firmicutes_A	Clostridia	Oscillospirales	Ruminococcaceae	Gemmiger	qucibialis	Group_51
s_9002000001401313_34.strict	92.59	1.02	0	2057386	8498	uSGB_15286	Family	k__Bacteria|p__Firmicutes|c__Clostridia|o__Clostridiales|f__Ruminococcaceae|g__GGB9728|s__GGB9728_SGB15286|t__SGB15286	0.0190518	51	51_2	Bacteria	Firmicutes_A	Clostridia	Oscillospirales	Ruminococcaceae	Gemmiger	qucibialis	Group_51
s_9002000001402221_7.strict	93.2	0.68	0	2029850	7969	uSGB_15286	Family	k__Bacteria|p__Firmicutes|c__Clostridia|o__Clostridiales|f__Ruminococcaceae|g__GGB9728|s__GGB9728_SGB15286|t__SGB15286	0.0177715	51	51_47	Bacteria	Firmicutes_A	Clostridia	Oscillospirales	Ruminococcaceae	Gemmiger	qucibialis	Group_51
s_9002000001412522_6.strict	94.5	0.68	0	2307310	13391	uSGB_15286	Family	k__Bacteria|p__Firmicutes|c__Clostridia|o__Clostridiales|f__Ruminococcaceae|g__GGB9728|s__GGB9728_SGB15286|t__SGB15286	0.0176873	51	51_21	Bacteria	Firmicutes_A	Clostridia	Oscillospirales	Ruminococcaceae	Gemmiger	qucibialis	Group_51
s_9002000001424256_3.orig	91.67	1.36	0	2187759	6943	uSGB_15290	Family	k__Bacteria|p__Firmicutes|c__Clostridia|o__Clostridiales|f__Ruminococcaceae|g__GGB9730|s__GGB9730_SGB15290|t__SGB15290	0.177423	51	51_48	Bacteria	Firmicutes_A	Clostridia	Oscillospirales	Ruminococcaceae	Gemmiger	qucibialis	Group_51
s_9002000001424425_30.strict	95.24	1.7	0	2227413	11268	uSGB_15286	Family	k__Bacteria|p__Firmicutes|c__Clostridia|o__Clostridiales|f__Ruminococcaceae|g__GGB9728|s__GGB9728_SGB15286|t__SGB15286	0.0179489	51	51_26	Bacteria	Firmicutes_A	Clostridia	Oscillospirales	Ruminococcaceae	Gemmiger	qucibialis	Group_51
s_9002000001425650_31.strict	93.99	0.68	0	2176579	10830	uSGB_15286	Family	k__Bacteria|p__Firmicutes|c__Clostridia|o__Clostridiales|f__Ruminococcaceae|g__GGB9728|s__GGB9728_SGB15286|t__SGB15286	0.0174459	51	51_37	Bacteria	Firmicutes_A	Clostridia	Oscillospirales	Ruminococcaceae	Gemmiger	qucibialis	Group_51
s_9002000001428569_7.strict	93.48	0.85	0	2201217	9978	uSGB_15286	Family	k__Bacteria|p__Firmicutes|c__Clostridia|o__Clostridiales|f__Ruminococcaceae|g__GGB9728|s__GGB9728_SGB15286|t__SGB15286	0.018068	51	51_12	Bacteria	Firmicutes_A	Clostridia	Oscillospirales	Ruminococcaceae	Gemmiger	qucibialis	Group_51
s_9002000001435151_26.permissive	95.01	0.68	0	2150846	10214	uSGB_15286	Family	k__Bacteria|p__Firmicutes|c__Clostridia|o__Clostridiales|f__Ruminococcaceae|g__GGB9728|s__GGB9728_SGB15286|t__SGB15286	0.0175655	51	51_17	Bacteria	Firmicutes_A	Clostridia	Oscillospirales	Ruminococcaceae	Gemmiger	qucibialis	Group_51
s_9002000001446520_10.permissive	95.55	0.68	0	2286062	11920	uSGB_15290	Family	k__Bacteria|p__Firmicutes|c__Clostridia|o__Clostridiales|f__Ruminococcaceae|g__GGB9730|s__GGB9730_SGB15290|t__SGB15290	0.171288	51	51_22	Bacteria	Firmicutes_A	Clostridia	Oscillospirales	Ruminococcaceae	Gemmiger	qucibialis	Group_51
s_9002000001448688_32.strict	95.92	0.68	0	2412416	13345	uSGB_15286	Family	k__Bacteria|p__Firmicutes|c__Clostridia|o__Clostridiales|f__Ruminococcaceae|g__GGB9728|s__GGB9728_SGB15286|t__SGB15286	0.0195333	51	51_49	Bacteria	Firmicutes_A	Clostridia	Oscillospirales	Ruminococcaceae	Gemmiger	qucibialis	Group_51
s_9002000001454080_26.permissive	96.03	1.36	50	2326337	11714	uSGB_15286	Family	k__Bacteria|p__Firmicutes|c__Clostridia|o__Clostridiales|f__Ruminococcaceae|g__GGB9728|s__GGB9728_SGB15286|t__SGB15286	0.0188938	51	51_20	Bacteria	Firmicutes_A	Clostridia	Oscillospirales	Ruminococcaceae	Gemmiger	qucibialis	Group_51
s_9002000001466194_1.strict	91.84	0.68	0	2037926	11954	uSGB_15286	Family	k__Bacteria|p__Firmicutes|c__Clostridia|o__Clostridiales|f__Ruminococcaceae|g__GGB9728|s__GGB9728_SGB15286|t__SGB15286	0.018653	51	51_34	Bacteria	Firmicutes_A	Clostridia	Oscillospirales	Ruminococcaceae	Gemmiger	qucibialis	Group_51
s_9002000001467807_19.permissive	95.65	0.68	0	2300207	8696	uSGB_15286	Family	k__Bacteria|p__Firmicutes|c__Clostridia|o__Clostridiales|f__Ruminococcaceae|g__GGB9728|s__GGB9728_SGB15286|t__SGB15286	0.0199235	51	51_54	Bacteria	Firmicutes_A	Clostridia	Oscillospirales	Ruminococcaceae	Gemmiger	qucibialis	Group_51
s_9002000001473223_42.strict	95.24	1.02	0	2187101	12994	uSGB_15286	Family	k__Bacteria|p__Firmicutes|c__Clostridia|o__Clostridiales|f__Ruminococcaceae|g__GGB9728|s__GGB9728_SGB15286|t__SGB15286	0.0174048	51	51_30	Bacteria	Firmicutes_A	Clostridia	Oscillospirales	Ruminococcaceae	Gemmiger	qucibialis	Group_51
s_9002000001475729LL_1.strict	92.52	0	0	2150750	11491	uSGB_15286	Family	k__Bacteria|p__Firmicutes|c__Clostridia|o__Clostridiales|f__Ruminococcaceae|g__GGB9728|s__GGB9728_SGB15286|t__SGB15286	0.0177721	51	51_9	Bacteria	Firmicutes_A	Clostridia	Oscillospirales	Ruminococcaceae	Gemmiger	qucibialis	Group_51
s_9002000001475747_10.strict	93.2	0.68	0	2162806	14832	uSGB_15286	Family	k__Bacteria|p__Firmicutes|c__Clostridia|o__Clostridiales|f__Ruminococcaceae|g__GGB9728|s__GGB9728_SGB15286|t__SGB15286	0.0178128	51	51_11	Bacteria	Firmicutes_A	Clostridia	Oscillospirales	Ruminococcaceae	Gemmiger	qucibialis	Group_51
s_9002000001476459_6.permissive	95.75	0.82	50	2219827	10253	uSGB_15286	Family	k__Bacteria|p__Firmicutes|c__Clostridia|o__Clostridiales|f__Ruminococcaceae|g__GGB9728|s__GGB9728_SGB15286|t__SGB15286	0.0178361	51	51_42	Bacteria	Firmicutes_A	Clostridia	Oscillospirales	Ruminococcaceae	Gemmiger	qucibialis	Group_51
s_9002000001477886_20.strict	97.96	0.68	0	2580004	13366	uSGB_15286	Family	k__Bacteria|p__Firmicutes|c__Clostridia|o__Clostridiales|f__Ruminococcaceae|g__GGB9728|s__GGB9728_SGB15286|t__SGB15286	0.0188187	51	51_16	Bacteria	Firmicutes_A	Clostridia	Oscillospirales	Ruminococcaceae	Gemmiger	qucibialis	Group_51
s_9002000001478776_19.permissive	94.33	0.68	0	2458657	12292	uSGB_15286	Family	k__Bacteria|p__Firmicutes|c__Clostridia|o__Clostridiales|f__Ruminococcaceae|g__GGB9728|s__GGB9728_SGB15286|t__SGB15286	0.0192495	51	51_46	Bacteria	Firmicutes_A	Clostridia	Oscillospirales	Ruminococcaceae	Gemmiger	qucibialis	Group_51
s_9002000001480184LL_12.strict	95.25	1.36	0	2378078	11026	uSGB_15286	Family	k__Bacteria|p__Firmicutes|c__Clostridia|o__Clostridiales|f__Ruminococcaceae|g__GGB9728|s__GGB9728_SGB15286|t__SGB15286	0.0184232	51	51_40	Bacteria	Firmicutes_A	Clostridia	Oscillospirales	Ruminococcaceae	Gemmiger	qucibialis	Group_51
s_9002000001531363_32.strict	97.28	0.68	0	2404092	15196	uSGB_15286	Family	k__Bacteria|p__Firmicutes|c__Clostridia|o__Clostridiales|f__Ruminococcaceae|g__GGB9728|s__GGB9728_SGB15286|t__SGB15286	0.0178701	51	51_46	Bacteria	Firmicutes_A	Clostridia	Oscillospirales	Ruminococcaceae	Gemmiger	qucibialis	Group_51
s_9002000001565405_13.strict	96.58	0.68	0	2323590	14851	uSGB_15286	Family	k__Bacteria|p__Firmicutes|c__Clostridia|o__Clostridiales|f__Ruminococcaceae|g__GGB9728|s__GGB9728_SGB15286|t__SGB15286	0.0172677	51	51_31	Bacteria	Firmicutes_A	Clostridia	Oscillospirales	Ruminococcaceae	Gemmiger	qucibialis	Group_51
s_9002000001566660_11.permissive	90.26	0	0	2119134	7866	uSGB_15286	Family	k__Bacteria|p__Firmicutes|c__Clostridia|o__Clostridiales|f__Ruminococcaceae|g__GGB9728|s__GGB9728_SGB15286|t__SGB15286	0.0177194	51	51_18	Bacteria	Firmicutes_A	Clostridia	Oscillospirales	Ruminococcaceae	Gemmiger	qucibialis	Group_51
s_9002000001567974_26.strict	94.19	1.02	0	2594702	12692	uSGB_15286	Family	k__Bacteria|p__Firmicutes|c__Clostridia|o__Clostridiales|f__Ruminococcaceae|g__GGB9728|s__GGB9728_SGB15286|t__SGB15286	0.0191225	51	51_13	Bacteria	Firmicutes_A	Clostridia	Oscillospirales	Ruminococcaceae	Gemmiger	qucibialis	Group_51
s_9002000001169770_4.permissive	91.27	0.74	50	2116170	10159	kSGB_15300	Species	k__Bacteria|p__Firmicutes|c__Clostridia|o__Clostridiales|f__Ruminococcaceae|g__Gemmiger|s__Gemmiger_formicilis|t__SGB15300	0.0247016	52	52_3	Bacteria	Firmicutes_A	Clostridia	Oscillospirales	Ruminococcaceae	Gemmiger	formicilis	Group_52
s_9002000001241407_5.permissive	90.71	1.27	8.33	2049337	14094	kSGB_15300	Species	k__Bacteria|p__Firmicutes|c__Clostridia|o__Clostridiales|f__Ruminococcaceae|g__Gemmiger|s__Gemmiger_formicilis|t__SGB15300	0.0259374	52	52_1	Bacteria	Firmicutes_A	Clostridia	Oscillospirales	Ruminococcaceae	Gemmiger	formicilis	Group_52
s_9002000001352086_20.orig	91.95	0	0	2088923	15216	kSGB_15300	Species	k__Bacteria|p__Firmicutes|c__Clostridia|o__Clostridiales|f__Ruminococcaceae|g__Gemmiger|s__Gemmiger_formicilis|t__SGB15300	0.0248209	52	52_8	Bacteria	Firmicutes_A	Clostridia	Oscillospirales	Ruminococcaceae	Gemmiger	formicilis	Group_52
s_9002000001361192_3.permissive	92.52	0	0	2176685	34443	kSGB_15300	Species	k__Bacteria|p__Firmicutes|c__Clostridia|o__Clostridiales|f__Ruminococcaceae|g__Gemmiger|s__Gemmiger_formicilis|t__SGB15300	0.0232528	52	52_5	Bacteria	Firmicutes_A	Clostridia	Oscillospirales	Ruminococcaceae	Gemmiger	formicilis	Group_52
s_9002000001414420_25.strict	94.42	1.02	50	2070218	11749	kSGB_15300	Species	k__Bacteria|p__Firmicutes|c__Clostridia|o__Clostridiales|f__Ruminococcaceae|g__Gemmiger|s__Gemmiger_formicilis|t__SGB15300	0.0241571	52	52_4	Bacteria	Firmicutes_A	Clostridia	Oscillospirales	Ruminococcaceae	Gemmiger	formicilis	Group_52
s_9002000001484586_9.strict	90.19	0	0	2194219	16391	kSGB_15300	Species	k__Bacteria|p__Firmicutes|c__Clostridia|o__Clostridiales|f__Ruminococcaceae|g__Gemmiger|s__Gemmiger_formicilis|t__SGB15300	0.0243145	52	52_2	Bacteria	Firmicutes_A	Clostridia	Oscillospirales	Ruminococcaceae	Gemmiger	formicilis	Group_52
s_9002000001582170_28.strict	93.27	0	0	2196346	48953	kSGB_15300	Species	k__Bacteria|p__Firmicutes|c__Clostridia|o__Clostridiales|f__Ruminococcaceae|g__Gemmiger|s__Gemmiger_formicilis|t__SGB15300	0.0231239	52	52_6	Bacteria	Firmicutes_A	Clostridia	Oscillospirales	Ruminococcaceae	Gemmiger	formicilis	Group_52
s_9002000001589917_33.permissive	90.7	0.34	100	2085309	19796	kSGB_15300	Species	k__Bacteria|p__Firmicutes|c__Clostridia|o__Clostridiales|f__Ruminococcaceae|g__Gemmiger|s__Gemmiger_formicilis|t__SGB15300	0.0243385	52	52_7	Bacteria	Firmicutes_A	Clostridia	Oscillospirales	Ruminococcaceae	Gemmiger	formicilis	Group_52
s_9002000001466194_22.strict	94.77	0	0	2301828	43688	uSGB_15299	Genus	k__Bacteria|p__Firmicutes|c__Clostridia|o__Clostridiales|f__Ruminococcaceae|g__Gemmiger|s__Gemmiger_SGB15299|t__SGB15299	0.0222041	53	53_0	Bacteria	Firmicutes_A	Clostridia	Oscillospirales	Ruminococcaceae	Gemmiger	sp900540775	Group_53
s_9002000001196698_9.permissive	90.11	0	0	1635489	11718	uSGB_4303	Other	k__Bacteria|p__Firmicutes|c__CFGB1340|o__OFGB1340|f__FGB1340|g__GGB3256|s__GGB3256_SGB4303|t__SGB4303	0.0239849	54	54_3	Bacteria	Firmicutes_A	Clostridia	Oscillospirales	Acutalibacteraceae	CAG-217	sp000436335	Group_54
s_9002000001212011_35.permissive	95.3	0.67	100	1887949	88890	uSGB_4303	Other	k__Bacteria|p__Firmicutes|c__CFGB1340|o__OFGB1340|f__FGB1340|g__GGB3256|s__GGB3256_SGB4303|t__SGB4303	0.0247322	54	54_5	Bacteria	Firmicutes_A	Clostridia	Oscillospirales	Acutalibacteraceae	CAG-217	sp000436335	Group_54
s_9002000001225234_11.orig	93.62	0	0	1734734	95517	uSGB_4303	Other	k__Bacteria|p__Firmicutes|c__CFGB1340|o__OFGB1340|f__FGB1340|g__GGB3256|s__GGB3256_SGB4303|t__SGB4303	0.0247118	54	54_1	Bacteria	Firmicutes_A	Clostridia	Oscillospirales	Acutalibacteraceae	CAG-217	sp000436335	Group_54
s_9002000001228512_3.orig	94.63	0	0	1826004	191771	uSGB_4303	Other	k__Bacteria|p__Firmicutes|c__CFGB1340|o__OFGB1340|f__FGB1340|g__GGB3256|s__GGB3256_SGB4303|t__SGB4303	0.0225355	54	54_4	Bacteria	Firmicutes_A	Clostridia	Oscillospirales	Acutalibacteraceae	CAG-217	sp000436335	Group_54
s_9002000001246252_29.strict	95.75	0	0	1841181	68789	uSGB_4303	Other	k__Bacteria|p__Firmicutes|c__CFGB1340|o__OFGB1340|f__FGB1340|g__GGB3256|s__GGB3256_SGB4303|t__SGB4303	0.0228582	54	54_4	Bacteria	Firmicutes_A	Clostridia	Oscillospirales	Acutalibacteraceae	CAG-217	sp000436335	Group_54
s_9002000001256080_6.permissive	97.32	0	0	1923264	71182	uSGB_4303	Other	k__Bacteria|p__Firmicutes|c__CFGB1340|o__OFGB1340|f__FGB1340|g__GGB3256|s__GGB3256_SGB4303|t__SGB4303	0.0227191	54	54_4	Bacteria	Firmicutes_A	Clostridia	Oscillospirales	Acutalibacteraceae	CAG-217	sp000436335	Group_54
s_9002000001276538_25.permissive	92.17	1.01	0	1690935	20514	uSGB_4303	Other	k__Bacteria|p__Firmicutes|c__CFGB1340|o__OFGB1340|f__FGB1340|g__GGB3256|s__GGB3256_SGB4303|t__SGB4303	0.0235001	54	54_2	Bacteria	Firmicutes_A	Clostridia	Oscillospirales	Acutalibacteraceae	CAG-217	sp000436335	Group_54
s_9002000001282052_32.permissive	90.38	0	0	1745427	73773	uSGB_4303	Other	k__Bacteria|p__Firmicutes|c__CFGB1340|o__OFGB1340|f__FGB1340|g__GGB3256|s__GGB3256_SGB4303|t__SGB4303	0.0256368	54	54_3	Bacteria	Firmicutes_A	Clostridia	Oscillospirales	Acutalibacteraceae	CAG-217	sp000436335	Group_54
s_9002000001301588_65.permissive	95.3	0	0	1809488	357065	uSGB_4303	Other	k__Bacteria|p__Firmicutes|c__CFGB1340|o__OFGB1340|f__FGB1340|g__GGB3256|s__GGB3256_SGB4303|t__SGB4303	0.024262	54	54_1	Bacteria	Firmicutes_A	Clostridia	Oscillospirales	Acutalibacteraceae	CAG-217	sp000436335	Group_54
s_9002000001317659_18.permissive	97.32	0	0	1931603	96448	uSGB_4303	Other	k__Bacteria|p__Firmicutes|c__CFGB1340|o__OFGB1340|f__FGB1340|g__GGB3256|s__GGB3256_SGB4303|t__SGB4303	0.0237814	54	54_1	Bacteria	Firmicutes_A	Clostridia	Oscillospirales	Acutalibacteraceae	CAG-217	sp000436335	Group_54
s_9002000001350528_46.strict	96.98	0	0	1813937	175688	uSGB_4303	Other	k__Bacteria|p__Firmicutes|c__CFGB1340|o__OFGB1340|f__FGB1340|g__GGB3256|s__GGB3256_SGB4303|t__SGB4303	0.0237548	54	54_1	Bacteria	Firmicutes_A	Clostridia	Oscillospirales	Acutalibacteraceae	CAG-217	sp000436335	Group_54
s_9002000001364710_10.strict	96.2	0.67	0	1755978	26626	uSGB_4303	Other	k__Bacteria|p__Firmicutes|c__CFGB1340|o__OFGB1340|f__FGB1340|g__GGB3256|s__GGB3256_SGB4303|t__SGB4303	0.0259256	54	54_10	Bacteria	Firmicutes_A	Clostridia	Oscillospirales	Acutalibacteraceae	CAG-217	sp000436335	Group_54
s_9002000001366180_27.permissive	93.29	0.89	50	1722081	23742	uSGB_4303	Other	k__Bacteria|p__Firmicutes|c__CFGB1340|o__OFGB1340|f__FGB1340|g__GGB3256|s__GGB3256_SGB4303|t__SGB4303	0.0294959	54	54_11	Bacteria	Firmicutes_A	Clostridia	Oscillospirales	Acutalibacteraceae	CAG-217	sp000436335	Group_54
s_9002000001366751_2.permissive	91.83	0	0	1703271	26381	uSGB_4303	Other	k__Bacteria|p__Firmicutes|c__CFGB1340|o__OFGB1340|f__FGB1340|g__GGB3256|s__GGB3256_SGB4303|t__SGB4303	0.0233824	54	54_2	Bacteria	Firmicutes_A	Clostridia	Oscillospirales	Acutalibacteraceae	CAG-217	sp000436335	Group_54
s_9002000001374735_20.permissive	97.32	0	0	1895397	149946	uSGB_4303	Other	k__Bacteria|p__Firmicutes|c__CFGB1340|o__OFGB1340|f__FGB1340|g__GGB3256|s__GGB3256_SGB4303|t__SGB4303	0.0286855	54	54_12	Bacteria	Firmicutes_A	Clostridia	Oscillospirales	Acutalibacteraceae	CAG-217	sp000436335	Group_54
s_9002000001375980_20.orig	95.97	0	0	1800593	60433	uSGB_4303	Other	k__Bacteria|p__Firmicutes|c__CFGB1340|o__OFGB1340|f__FGB1340|g__GGB3256|s__GGB3256_SGB4303|t__SGB4303	0.0258367	54	54_8	Bacteria	Firmicutes_A	Clostridia	Oscillospirales	Acutalibacteraceae	CAG-217	sp000436335	Group_54
s_9002000001390280_27.permissive	97.32	0	0	1873448	89813	uSGB_4303	Other	k__Bacteria|p__Firmicutes|c__CFGB1340|o__OFGB1340|f__FGB1340|g__GGB3256|s__GGB3256_SGB4303|t__SGB4303	0.0223505	54	54_2	Bacteria	Firmicutes_A	Clostridia	Oscillospirales	Acutalibacteraceae	CAG-217	sp000436335	Group_54
s_9002000001393098_17.permissive	97.32	0.67	0	1865056	58013	uSGB_4303	Other	k__Bacteria|p__Firmicutes|c__CFGB1340|o__OFGB1340|f__FGB1340|g__GGB3256|s__GGB3256_SGB4303|t__SGB4303	0.0260535	54	54_9	Bacteria	Firmicutes_A	Clostridia	Oscillospirales	Acutalibacteraceae	CAG-217	sp000436335	Group_54
s_9002000001407430_13.permissive	92.8	0	0	1763733	47614	uSGB_4303	Other	k__Bacteria|p__Firmicutes|c__CFGB1340|o__OFGB1340|f__FGB1340|g__GGB3256|s__GGB3256_SGB4303|t__SGB4303	0.0243146	54	54_1	Bacteria	Firmicutes_A	Clostridia	Oscillospirales	Acutalibacteraceae	CAG-217	sp000436335	Group_54
s_9002000001408172_43.permissive	91.15	0	0	1718646	18617	uSGB_4303	Other	k__Bacteria|p__Firmicutes|c__CFGB1340|o__OFGB1340|f__FGB1340|g__GGB3256|s__GGB3256_SGB4303|t__SGB4303	0.023427	54	54_4	Bacteria	Firmicutes_A	Clostridia	Oscillospirales	Acutalibacteraceae	CAG-217	sp000436335	Group_54
s_9002000001422370_1.permissive	97.32	0	0	1911457	211920	uSGB_4303	Other	k__Bacteria|p__Firmicutes|c__CFGB1340|o__OFGB1340|f__FGB1340|g__GGB3256|s__GGB3256_SGB4303|t__SGB4303	0.0223911	54	54_4	Bacteria	Firmicutes_A	Clostridia	Oscillospirales	Acutalibacteraceae	CAG-217	sp000436335	Group_54
s_9002000001422430_22.strict	92.39	0.67	100	1802244	43667	uSGB_4303	Other	k__Bacteria|p__Firmicutes|c__CFGB1340|o__OFGB1340|f__FGB1340|g__GGB3256|s__GGB3256_SGB4303|t__SGB4303	0.0234297	54	54_1	Bacteria	Firmicutes_A	Clostridia	Oscillospirales	Acutalibacteraceae	CAG-217	sp000436335	Group_54
s_9002000001446594_33.permissive	94.63	0.17	0	1757875	57904	uSGB_4303	Other	k__Bacteria|p__Firmicutes|c__CFGB1340|o__OFGB1340|f__FGB1340|g__GGB3256|s__GGB3256_SGB4303|t__SGB4303	0.0229647	54	54_2	Bacteria	Firmicutes_A	Clostridia	Oscillospirales	Acutalibacteraceae	CAG-217	sp000436335	Group_54
s_9002000001475729LL_2.permissive	93.4	0.67	100	1794119	34117	uSGB_4303	Other	k__Bacteria|p__Firmicutes|c__CFGB1340|o__OFGB1340|f__FGB1340|g__GGB3256|s__GGB3256_SGB4303|t__SGB4303	0.0255078	54	54_7	Bacteria	Firmicutes_A	Clostridia	Oscillospirales	Acutalibacteraceae	CAG-217	sp000436335	Group_54
s_9002000001485725_13.permissive	90.21	0.22	0	1622910	11934	uSGB_4303	Other	k__Bacteria|p__Firmicutes|c__CFGB1340|o__OFGB1340|f__FGB1340|g__GGB3256|s__GGB3256_SGB4303|t__SGB4303	0.0240361	54	54_2	Bacteria	Firmicutes_A	Clostridia	Oscillospirales	Acutalibacteraceae	CAG-217	sp000436335	Group_54
s_9002000001531363_28.strict	96.48	0	0	1783968	37681	uSGB_4303	Other	k__Bacteria|p__Firmicutes|c__CFGB1340|o__OFGB1340|f__FGB1340|g__GGB3256|s__GGB3256_SGB4303|t__SGB4303	0.0223811	54	54_4	Bacteria	Firmicutes_A	Clostridia	Oscillospirales	Acutalibacteraceae	CAG-217	sp000436335	Group_54
s_9002000001554439_12.strict	92.2	1.81	0	1639001	8105	uSGB_4303	Other	k__Bacteria|p__Firmicutes|c__CFGB1340|o__OFGB1340|f__FGB1340|g__GGB3256|s__GGB3256_SGB4303|t__SGB4303	0.0257068	54	54_6	Bacteria	Firmicutes_A	Clostridia	Oscillospirales	Acutalibacteraceae	CAG-217	sp000436335	Group_54
s_9002000001565405_27.permissive	91.36	0	0	2612083	28021	kSGB_15271	Species	k__Bacteria|p__Firmicutes|c__Clostridia|o__Clostridiales|f__Ruminococcaceae|g__Ruthenibacterium|s__Ruthenibacterium_lactatiformans|t__SGB15271	0.0148632	55	55_0	Bacteria	Firmicutes_A	Clostridia	Oscillospirales	Ruminococcaceae	Ruthenibacterium	lactatiformans	Group_55
s_9002000001445318_46.permissive	96.64	0	0	1719429	48995	uSGB_4316	Family	k__Bacteria|p__Firmicutes|c__Clostridia|o__Clostridiales|f__Eubacteriaceae|g__GGB3267|s__GGB3267_SGB4316|t__SGB4316	0.0147062	56	56_0	Bacteria	Firmicutes_A	Clostridia	Oscillospirales	Acutalibacteraceae	Eubacterium_R	sp900539775	Group_56
s_9002000001570129_7.strict	95.32	0	0	1824234	24942	uSGB_4317	Family	k__Bacteria|p__Firmicutes|c__Clostridia|o__Clostridiales|f__Eubacteriaceae|g__GGB3267|s__GGB3267_SGB4317|t__SGB4317	0.0104106	57	57_0	Bacteria	Firmicutes_A	Clostridia	Oscillospirales	Acutalibacteraceae	Eubacterium_R	sp000433975	Group_57
s_9002000001225833_23.strict	94.63	0	0	1835553	26462	uSGB_4314	Family	k__Bacteria|p__Firmicutes|c__Clostridia|o__Clostridiales|f__Eubacteriaceae|g__GGB3265|s__GGB3265_SGB4314|t__SGB4314	0.0188502	58	58_0	Bacteria	Firmicutes_A	Clostridia	Oscillospirales	Acutalibacteraceae	Eubacterium_R	sp900539425	Group_58
s_9002000001531940_22.permissive	93.29	0	0	1794214	46820	uSGB_4313	Family	k__Bacteria|p__Firmicutes|c__Clostridia|o__Clostridiales|f__Eubacteriaceae|g__GGB3265|s__GGB3265_SGB4313|t__SGB4313	0.0151376	59	59_0	Bacteria	Firmicutes_A	Clostridia	Oscillospirales	Acutalibacteraceae	Eubacterium_R	sp900547915	Group_59
s_9002000001572713_8.orig	95.22	0.28	50	1835461	18534	uSGB_4335	Family	k__Bacteria|p__Firmicutes|c__Clostridia|o__Clostridiales|f__Eubacteriaceae|g__GGB3281|s__GGB3281_SGB4335|t__SGB4335	0.0130532	60	60_0	Bacteria	Firmicutes_A	Clostridia	Oscillospirales	Acutalibacteraceae	Eubacterium_R	sp003526845	Group_60
s_9002000001274506_28.permissive	92.51	0.34	100	1668849	7434	uSGB_4274	Family	k__Bacteria|p__Firmicutes|c__Clostridia|o__Clostridiales|f__Ruminococcaceae|g__GGB3236|s__GGB3236_SGB4274|t__SGB4274	0.0155646	61	61_3	Bacteria	Firmicutes_A	Clostridia	Oscillospirales	Acutalibacteraceae	CAG-964	sp000435335	Group_61
s_9002000001456330_23.permissive	97.09	0	0	1975555	75467	uSGB_4274	Family	k__Bacteria|p__Firmicutes|c__Clostridia|o__Clostridiales|f__Ruminococcaceae|g__GGB3236|s__GGB3236_SGB4274|t__SGB4274	0.0153462	61	61_1	Bacteria	Firmicutes_A	Clostridia	Oscillospirales	Acutalibacteraceae	CAG-964	sp000435335	Group_61
s_9002000001479951_10.permissive	96.87	0	0	1903897	40812	uSGB_4274	Family	k__Bacteria|p__Firmicutes|c__Clostridia|o__Clostridiales|f__Ruminococcaceae|g__GGB3236|s__GGB3236_SGB4274|t__SGB4274	0.0145535	61	61_2	Bacteria	Firmicutes_A	Clostridia	Oscillospirales	Acutalibacteraceae	CAG-964	sp000435335	Group_61
s_9002000001580090_22.permissive	97.09	0	0	1782288	15233	uSGB_4274	Family	k__Bacteria|p__Firmicutes|c__Clostridia|o__Clostridiales|f__Ruminococcaceae|g__GGB3236|s__GGB3236_SGB4274|t__SGB4274	0.0147131	61	61_1	Bacteria	Firmicutes_A	Clostridia	Oscillospirales	Acutalibacteraceae	CAG-964	sp000435335	Group_61
s_9002000001231803_37.strict	91.83	0	0	1566407	10134	uSGB_4328	Family	k__Bacteria|p__Firmicutes|c__Clostridia|o__Clostridiales|f__Eubacteriaceae|g__GGB3278|s__GGB3278_SGB4328|t__SGB4328	0.0172756	62	62_2	Bacteria	Firmicutes_A	Clostridia	Oscillospirales	Acutalibacteraceae	Eubacterium_R	sp000434995	Group_62
s_9002000001316393_28.strict	93.96	0	0	1672826	9337	uSGB_4328	Family	k__Bacteria|p__Firmicutes|c__Clostridia|o__Clostridiales|f__Eubacteriaceae|g__GGB3278|s__GGB3278_SGB4328|t__SGB4328	0.0176638	62	62_2	Bacteria	Firmicutes_A	Clostridia	Oscillospirales	Acutalibacteraceae	Eubacterium_R	sp000434995	Group_62
s_9002000001319297_5.permissive	91.95	0	0	1687804	10138	uSGB_4328	Family	k__Bacteria|p__Firmicutes|c__Clostridia|o__Clostridiales|f__Eubacteriaceae|g__GGB3278|s__GGB3278_SGB4328|t__SGB4328	0.0209788	62	62_3	Bacteria	Firmicutes_A	Clostridia	Oscillospirales	Acutalibacteraceae	Eubacterium_R	sp000434995	Group_62
s_9002000001341467_27.permissive	95.3	0	0	1671255	22093	uSGB_4328	Family	k__Bacteria|p__Firmicutes|c__Clostridia|o__Clostridiales|f__Eubacteriaceae|g__GGB3278|s__GGB3278_SGB4328|t__SGB4328	0.0177093	62	62_1	Bacteria	Firmicutes_A	Clostridia	Oscillospirales	Acutalibacteraceae	Eubacterium_R	sp000434995	Group_62
s_9002000001343701_5.strict	96.64	0	0	1774783	23509	uSGB_4328	Family	k__Bacteria|p__Firmicutes|c__Clostridia|o__Clostridiales|f__Eubacteriaceae|g__GGB3278|s__GGB3278_SGB4328|t__SGB4328	0.0215151	62	62_5	Bacteria	Firmicutes_A	Clostridia	Oscillospirales	Acutalibacteraceae	Eubacterium_R	sp000434995	Group_62
s_9002000001377910_31.strict	95.97	0	0	1717488	22989	uSGB_4328	Family	k__Bacteria|p__Firmicutes|c__Clostridia|o__Clostridiales|f__Eubacteriaceae|g__GGB3278|s__GGB3278_SGB4328|t__SGB4328	0.0167348	62	62_2	Bacteria	Firmicutes_A	Clostridia	Oscillospirales	Acutalibacteraceae	Eubacterium_R	sp000434995	Group_62
s_9002000001392457_37.permissive	92.45	0.34	100	1589435	11160	uSGB_4328	Family	k__Bacteria|p__Firmicutes|c__Clostridia|o__Clostridiales|f__Eubacteriaceae|g__GGB3278|s__GGB3278_SGB4328|t__SGB4328	0.0177529	62	62_2	Bacteria	Firmicutes_A	Clostridia	Oscillospirales	Acutalibacteraceae	Eubacterium_R	sp000434995	Group_62
s_9002000001395539_47.permissive	94.3	0	0	1751988	15158	uSGB_4328	Family	k__Bacteria|p__Firmicutes|c__Clostridia|o__Clostridiales|f__Eubacteriaceae|g__GGB3278|s__GGB3278_SGB4328|t__SGB4328	0.0170891	62	62_2	Bacteria	Firmicutes_A	Clostridia	Oscillospirales	Acutalibacteraceae	Eubacterium_R	sp000434995	Group_62
s_9002000001425650_11.permissive	95.64	0.22	100	1711944	13303	uSGB_4328	Family	k__Bacteria|p__Firmicutes|c__Clostridia|o__Clostridiales|f__Eubacteriaceae|g__GGB3278|s__GGB3278_SGB4328|t__SGB4328	0.0185377	62	62_4	Bacteria	Firmicutes_A	Clostridia	Oscillospirales	Acutalibacteraceae	Eubacterium_R	sp000434995	Group_62
s_9002000001525624_42.strict	98.32	0	0	1754309	21248	uSGB_4328	Family	k__Bacteria|p__Firmicutes|c__Clostridia|o__Clostridiales|f__Eubacteriaceae|g__GGB3278|s__GGB3278_SGB4328|t__SGB4328	0.0166276	62	62_2	Bacteria	Firmicutes_A	Clostridia	Oscillospirales	Acutalibacteraceae	Eubacterium_R	sp000434995	Group_62
s_9002000001582170_47.orig	97.32	0	0	1853930	18460	uSGB_4328	Family	k__Bacteria|p__Firmicutes|c__Clostridia|o__Clostridiales|f__Eubacteriaceae|g__GGB3278|s__GGB3278_SGB4328|t__SGB4328	0.019158	62	62_1	Bacteria	Firmicutes_A	Clostridia	Oscillospirales	Acutalibacteraceae	Eubacterium_R	sp000434995	Group_62
s_9002000001172687_9.strict	94.97	1.01	100	1758871	11024	uSGB_4327	Family	k__Bacteria|p__Firmicutes|c__Clostridia|o__Clostridiales|f__Eubacteriaceae|g__GGB3277|s__GGB3277_SGB4327|t__SGB4327	0.0255455	63	63_10	Bacteria	Firmicutes_A	Clostridia	Oscillospirales	Acutalibacteraceae	Eubacterium_R	sp000436835	Group_63
s_9002000001226278LL_30.permissive	95.3	0	0	1737273	26147	uSGB_4327	Family	k__Bacteria|p__Firmicutes|c__Clostridia|o__Clostridiales|f__Eubacteriaceae|g__GGB3277|s__GGB3277_SGB4327|t__SGB4327	0.021357	63	63_2	Bacteria	Firmicutes_A	Clostridia	Oscillospirales	Acutalibacteraceae	Eubacterium_R	sp000436835	Group_63
s_9002000001226394_23.permissive	96.64	0	0	1776681	24812	uSGB_4327	Family	k__Bacteria|p__Firmicutes|c__Clostridia|o__Clostridiales|f__Eubacteriaceae|g__GGB3277|s__GGB3277_SGB4327|t__SGB4327	0.0215923	63	63_1	Bacteria	Firmicutes_A	Clostridia	Oscillospirales	Acutalibacteraceae	Eubacterium_R	sp000436835	Group_63
s_9002000001243214_11.orig	94.3	0	0	1767733	14305	uSGB_4327	Family	k__Bacteria|p__Firmicutes|c__Clostridia|o__Clostridiales|f__Eubacteriaceae|g__GGB3277|s__GGB3277_SGB4327|t__SGB4327	0.0217275	63	63_2	Bacteria	Firmicutes_A	Clostridia	Oscillospirales	Acutalibacteraceae	Eubacterium_R	sp000436835	Group_63
s_9002000001247124_32.strict	92.95	0	0	1723991	34157	uSGB_4327	Family	k__Bacteria|p__Firmicutes|c__Clostridia|o__Clostridiales|f__Eubacteriaceae|g__GGB3277|s__GGB3277_SGB4327|t__SGB4327	0.0222428	63	63_2	Bacteria	Firmicutes_A	Clostridia	Oscillospirales	Acutalibacteraceae	Eubacterium_R	sp000436835	Group_63
s_9002000001250148_1.permissive	92.95	0	0	1787543	15766	uSGB_4327	Family	k__Bacteria|p__Firmicutes|c__Clostridia|o__Clostridiales|f__Eubacteriaceae|g__GGB3277|s__GGB3277_SGB4327|t__SGB4327	0.0224699	63	63_1	Bacteria	Firmicutes_A	Clostridia	Oscillospirales	Acutalibacteraceae	Eubacterium_R	sp000436835	Group_63
s_9002000001267207_25.permissive	93.29	0	0	1693781	32237	uSGB_4327	Family	k__Bacteria|p__Firmicutes|c__Clostridia|o__Clostridiales|f__Eubacteriaceae|g__GGB3277|s__GGB3277_SGB4327|t__SGB4327	0.023159	63	63_1	Bacteria	Firmicutes_A	Clostridia	Oscillospirales	Acutalibacteraceae	Eubacterium_R	sp000436835	Group_63
s_9002000001318745_8.permissive	93.62	0	0	1688496	16682	uSGB_4327	Family	k__Bacteria|p__Firmicutes|c__Clostridia|o__Clostridiales|f__Eubacteriaceae|g__GGB3277|s__GGB3277_SGB4327|t__SGB4327	0.021436	63	63_2	Bacteria	Firmicutes_A	Clostridia	Oscillospirales	Acutalibacteraceae	Eubacterium_R	sp000436835	Group_63
s_9002000001372130_14.strict	97.32	0	0	1810163	68809	uSGB_4327	Family	k__Bacteria|p__Firmicutes|c__Clostridia|o__Clostridiales|f__Eubacteriaceae|g__GGB3277|s__GGB3277_SGB4327|t__SGB4327	0.024144	63	63_5	Bacteria	Firmicutes_A	Clostridia	Oscillospirales	Acutalibacteraceae	Eubacterium_R	sp000436835	Group_63
s_9002000001385621_17.permissive	94.3	0	0	1902605	17411	uSGB_4327	Family	k__Bacteria|p__Firmicutes|c__Clostridia|o__Clostridiales|f__Eubacteriaceae|g__GGB3277|s__GGB3277_SGB4327|t__SGB4327	0.0239387	63	63_3	Bacteria	Firmicutes_A	Clostridia	Oscillospirales	Acutalibacteraceae	Eubacterium_R	sp000436835	Group_63
s_9002000001388561_15.strict	95.3	0.67	100	1832371	36324	uSGB_4327	Family	k__Bacteria|p__Firmicutes|c__Clostridia|o__Clostridiales|f__Eubacteriaceae|g__GGB3277|s__GGB3277_SGB4327|t__SGB4327	0.025151	63	63_7	Bacteria	Firmicutes_A	Clostridia	Oscillospirales	Acutalibacteraceae	Eubacterium_R	sp000436835	Group_63
s_9002000001391709_7.strict	92.37	0	0	1671582	8335	uSGB_4327	Family	k__Bacteria|p__Firmicutes|c__Clostridia|o__Clostridiales|f__Eubacteriaceae|g__GGB3277|s__GGB3277_SGB4327|t__SGB4327	0.0220836	63	63_1	Bacteria	Firmicutes_A	Clostridia	Oscillospirales	Acutalibacteraceae	Eubacterium_R	sp000436835	Group_63
s_9002000001403309_45.orig	97.65	0	0	1807371	80111	uSGB_4327	Family	k__Bacteria|p__Firmicutes|c__Clostridia|o__Clostridiales|f__Eubacteriaceae|g__GGB3277|s__GGB3277_SGB4327|t__SGB4327	0.0248506	63	63_8	Bacteria	Firmicutes_A	Clostridia	Oscillospirales	Acutalibacteraceae	Eubacterium_R	sp000436835	Group_63
s_9002000001425146_9.permissive	96.64	0	0	1790874	24389	uSGB_4327	Family	k__Bacteria|p__Firmicutes|c__Clostridia|o__Clostridiales|f__Eubacteriaceae|g__GGB3277|s__GGB3277_SGB4327|t__SGB4327	0.0218044	63	63_1	Bacteria	Firmicutes_A	Clostridia	Oscillospirales	Acutalibacteraceae	Eubacterium_R	sp000436835	Group_63
s_9002000001473223_12.permissive	93.62	0.34	0	1641306	18859	uSGB_4327	Family	k__Bacteria|p__Firmicutes|c__Clostridia|o__Clostridiales|f__Eubacteriaceae|g__GGB3277|s__GGB3277_SGB4327|t__SGB4327	0.024226	63	63_4	Bacteria	Firmicutes_A	Clostridia	Oscillospirales	Acutalibacteraceae	Eubacterium_R	sp000436835	Group_63
s_9002000001482920_20.orig	90.83	0.89	50	1699285	9304	uSGB_4327	Family	k__Bacteria|p__Firmicutes|c__Clostridia|o__Clostridiales|f__Eubacteriaceae|g__GGB3277|s__GGB3277_SGB4327|t__SGB4327	0.0259243	63	63_9	Bacteria	Firmicutes_A	Clostridia	Oscillospirales	Acutalibacteraceae	Eubacterium_R	sp000436835	Group_63
s_9002000001543510_33.permissive	91.95	0	0	1630334	11653	uSGB_4327	Family	k__Bacteria|p__Firmicutes|c__Clostridia|o__Clostridiales|f__Eubacteriaceae|g__GGB3277|s__GGB3277_SGB4327|t__SGB4327	0.0260914	63	63_6	Bacteria	Firmicutes_A	Clostridia	Oscillospirales	Acutalibacteraceae	Eubacterium_R	sp000436835	Group_63
s_9002000001574290_23.permissive	94.3	0	0	1714433	9430	uSGB_4327	Family	k__Bacteria|p__Firmicutes|c__Clostridia|o__Clostridiales|f__Eubacteriaceae|g__GGB3277|s__GGB3277_SGB4327|t__SGB4327	0.0230112	63	63_2	Bacteria	Firmicutes_A	Clostridia	Oscillospirales	Acutalibacteraceae	Eubacterium_R	sp000436835	Group_63
s_9002000001307240_1.strict	97.15	0	0	2513178	35483	uSGB_4247	Other	k__Bacteria|p__Firmicutes|c__CFGB1332|o__OFGB1332|f__FGB1332|g__GGB3215|s__GGB3215_SGB4247|t__SGB4247	0.0167479	64	64_0	Bacteria	Firmicutes_A	Clostridia	Oscillospirales	Ruminococcaceae	CAG-353	sp900066885	Group_64
s_9002000001316393_24.permissive	97.93	0.38	0	2354211	58136	kSGB_7968	Species	k__Bacteria|p__Firmicutes|c__Bacilli|o__Lactobacillales|f__Enterococcaceae|g__Enterococcus|s__Enterococcus_faecium|t__SGB7968	0.0154091	65	65_0	Bacteria	Firmicutes	Bacilli	Lactobacillales	Enterococcaceae	Enterococcus_B	lactis	Group_65
s_9002000001222690_23.strict	98.11	0	0	1971827	13360	uSGB_6783	Genus	k__Bacteria|p__Firmicutes|c__Erysipelotrichia|o__Erysipelotrichales|f__Erysipelotrichaceae|g__Catenibacterium|s__Catenibacterium_SGB6783|t__SGB6783	0.0305271	66	66_1	Bacteria	Firmicutes	Bacilli	Erysipelotrichales	Coprobacillaceae	Catenibacterium	sp000437715	Group_66
s_9002000001334186_17.strict	95.28	0	0	1913599	9134	uSGB_6783	Genus	k__Bacteria|p__Firmicutes|c__Erysipelotrichia|o__Erysipelotrichales|f__Erysipelotrichaceae|g__Catenibacterium|s__Catenibacterium_SGB6783|t__SGB6783	0.0307732	66	66_1	Bacteria	Firmicutes	Bacilli	Erysipelotrichales	Coprobacillaceae	Catenibacterium	sp000437715	Group_66
s_9002000001350528_33.strict	100	0	0	1949760	19936	uSGB_6783	Genus	k__Bacteria|p__Firmicutes|c__Erysipelotrichia|o__Erysipelotrichales|f__Erysipelotrichaceae|g__Catenibacterium|s__Catenibacterium_SGB6783|t__SGB6783	0.031216	66	66_7	Bacteria	Firmicutes	Bacilli	Erysipelotrichales	Coprobacillaceae	Catenibacterium	sp000437715	Group_66
s_9002000001352086_44.permissive	100	0	0	1931749	11393	uSGB_6783	Genus	k__Bacteria|p__Firmicutes|c__Erysipelotrichia|o__Erysipelotrichales|f__Erysipelotrichaceae|g__Catenibacterium|s__Catenibacterium_SGB6783|t__SGB6783	0.0309315	66	66_3	Bacteria	Firmicutes	Bacilli	Erysipelotrichales	Coprobacillaceae	Catenibacterium	sp000437715	Group_66
s_9002000001356540LL_23.strict	98.58	0.33	0	1865204	6385	uSGB_6783	Genus	k__Bacteria|p__Firmicutes|c__Erysipelotrichia|o__Erysipelotrichales|f__Erysipelotrichaceae|g__Catenibacterium|s__Catenibacterium_SGB6783|t__SGB6783	0.0307541	66	66_4	Bacteria	Firmicutes	Bacilli	Erysipelotrichales	Coprobacillaceae	Catenibacterium	sp000437715	Group_66
s_9002000001364710_5.permissive	95.28	0	0	2052831	16085	uSGB_6783	Genus	k__Bacteria|p__Firmicutes|c__Erysipelotrichia|o__Erysipelotrichales|f__Erysipelotrichaceae|g__Catenibacterium|s__Catenibacterium_SGB6783|t__SGB6783	0.0309351	66	66_1	Bacteria	Firmicutes	Bacilli	Erysipelotrichales	Coprobacillaceae	Catenibacterium	sp000437715	Group_66
s_9002000001436220_5.strict	100	0	0	2012970	14986	uSGB_6783	Genus	k__Bacteria|p__Firmicutes|c__Erysipelotrichia|o__Erysipelotrichales|f__Erysipelotrichaceae|g__Catenibacterium|s__Catenibacterium_SGB6783|t__SGB6783	0.0318458	66	66_5	Bacteria	Firmicutes	Bacilli	Erysipelotrichales	Coprobacillaceae	Catenibacterium	sp000437715	Group_66
s_9002000001504132_19.permissive	94.34	0.04	0	1858844	10640	uSGB_6783	Genus	k__Bacteria|p__Firmicutes|c__Erysipelotrichia|o__Erysipelotrichales|f__Erysipelotrichaceae|g__Catenibacterium|s__Catenibacterium_SGB6783|t__SGB6783	0.0318349	66	66_6	Bacteria	Firmicutes	Bacilli	Erysipelotrichales	Coprobacillaceae	Catenibacterium	sp000437715	Group_66
s_9002000001543510_32.orig	94.34	0.47	0	1794389	7818	uSGB_6783	Genus	k__Bacteria|p__Firmicutes|c__Erysipelotrichia|o__Erysipelotrichales|f__Erysipelotrichaceae|g__Catenibacterium|s__Catenibacterium_SGB6783|t__SGB6783	0.0317717	66	66_2	Bacteria	Firmicutes	Bacilli	Erysipelotrichales	Coprobacillaceae	Catenibacterium	sp000437715	Group_66
s_9002000001495848_23.permissive	91.51	0	0	1880725	9946	kSGB_6778	Species	k__Bacteria|p__Firmicutes|c__Erysipelotrichia|o__Erysipelotrichales|f__Erysipelotrichaceae|g__Catenibacterium|s__Catenibacterium_mitsuokai|t__SGB6778	0.0277515	67	67_0	Bacteria	Firmicutes	Bacilli	Erysipelotrichales	Coprobacillaceae	Catenibacterium	mitsuokai	Group_67
s_9002000001187760_1.strict	90.41	0.94	0	1881279	4455	uSGB_6754	Genus	k__Bacteria|p__Firmicutes|c__Erysipelotrichia|o__Erysipelotrichales|f__Erysipelotrichaceae|g__Coprobacillus|s__Coprobacillus_SGB6754|t__SGB6754	0.0348513	68	68_0	Bacteria	Firmicutes	Bacilli	Erysipelotrichales	Coprobacillaceae	Faecalibacillus	intestinalis	Group_68
s_9002000001179490_4.strict	94.92	2.59	0	1585013	49196	kSGB_6817	Species	k__Bacteria|p__Chlamydiae|c__Chlamydiia|o__Chlamydiales|f__Chlamydiaceae|g__Chlamydia|s__Chlamydia_trachomatis|t__SGB6817	0.0109362	69	69_1	Bacteria	Firmicutes	Bacilli	Erysipelotrichales	Erysipelotrichaceae	Absicoccus	sp000434355	Group_69
s_9002000001197701_13.permissive	94.61	1.65	0	1473655	32526	kSGB_6817	Species	k__Bacteria|p__Chlamydiae|c__Chlamydiia|o__Chlamydiales|f__Chlamydiaceae|g__Chlamydia|s__Chlamydia_trachomatis|t__SGB6817	0.012311	69	69_1	Bacteria	Firmicutes	Bacilli	Erysipelotrichales	Erysipelotrichaceae	Absicoccus	sp000434355	Group_69
s_9002000001160621_8.strict	93.67	0.71	0	1913469	17506	uSGB_6796	Genus	k__Bacteria|p__Firmicutes|c__Erysipelotrichia|o__Erysipelotrichales|f__Erysipelotrichaceae|g__Holdemanella|s__Holdemanella_SGB6796|t__SGB6796	0.0296893	70	70_26	Bacteria	Firmicutes	Bacilli	Erysipelotrichales	Erysipelotrichaceae	Holdemanella	porci	Group_70
s_9002000001186403_12.strict	96.5	0.71	0	2006851	28894	uSGB_6796	Genus	k__Bacteria|p__Firmicutes|c__Erysipelotrichia|o__Erysipelotrichales|f__Erysipelotrichaceae|g__Holdemanella|s__Holdemanella_SGB6796|t__SGB6796	0.02831	70	70_16	Bacteria	Firmicutes	Bacilli	Erysipelotrichales	Erysipelotrichaceae	Holdemanella	porci	Group_70
s_9002000001226394_1.strict	93.67	0.71	0	2151514	20292	uSGB_6796	Genus	k__Bacteria|p__Firmicutes|c__Erysipelotrichia|o__Erysipelotrichales|f__Erysipelotrichaceae|g__Holdemanella|s__Holdemanella_SGB6796|t__SGB6796	0.0288795	70	70_24	Bacteria	Firmicutes	Bacilli	Erysipelotrichales	Erysipelotrichaceae	Holdemanella	porci	Group_70
s_9002000001227892_19.permissive	92.72	0.71	0	2125585	14766	uSGB_6796	Genus	k__Bacteria|p__Firmicutes|c__Erysipelotrichia|o__Erysipelotrichales|f__Erysipelotrichaceae|g__Holdemanella|s__Holdemanella_SGB6796|t__SGB6796	0.0315791	70	70_7	Bacteria	Firmicutes	Bacilli	Erysipelotrichales	Erysipelotrichaceae	Holdemanella	porci	Group_70
s_9002000001231803_25.strict	94.68	0.71	0	2047659	16636	uSGB_6796	Genus	k__Bacteria|p__Firmicutes|c__Erysipelotrichia|o__Erysipelotrichales|f__Erysipelotrichaceae|g__Holdemanella|s__Holdemanella_SGB6796|t__SGB6796	0.030103	70	70_28	Bacteria	Firmicutes	Bacilli	Erysipelotrichales	Erysipelotrichaceae	Holdemanella	porci	Group_70
s_9002000001242988_30.permissive	91.91	0.71	0	1926141	15327	uSGB_6796	Genus	k__Bacteria|p__Firmicutes|c__Erysipelotrichia|o__Erysipelotrichales|f__Erysipelotrichaceae|g__Holdemanella|s__Holdemanella_SGB6796|t__SGB6796	0.029119	70	70_11	Bacteria	Firmicutes	Bacilli	Erysipelotrichales	Erysipelotrichaceae	Holdemanella	porci	Group_70
s_9002000001244042_24.strict	95.69	0	0	1804967	21430	uSGB_6796	Genus	k__Bacteria|p__Firmicutes|c__Erysipelotrichia|o__Erysipelotrichales|f__Erysipelotrichaceae|g__Holdemanella|s__Holdemanella_SGB6796|t__SGB6796	0.0376506	70	70_3	Bacteria	Firmicutes	Bacilli	Erysipelotrichales	Erysipelotrichaceae	Holdemanella	porci	Group_70
s_9002000001248749_13.permissive	95.96	0.71	0	2042239	17772	uSGB_6796	Genus	k__Bacteria|p__Firmicutes|c__Erysipelotrichia|o__Erysipelotrichales|f__Erysipelotrichaceae|g__Holdemanella|s__Holdemanella_SGB6796|t__SGB6796	0.0282916	70	70_20	Bacteria	Firmicutes	Bacilli	Erysipelotrichales	Erysipelotrichaceae	Holdemanella	porci	Group_70
s_9002000001259288_12.permissive	93.53	0.71	0	1840212	22557	uSGB_6796	Genus	k__Bacteria|p__Firmicutes|c__Erysipelotrichia|o__Erysipelotrichales|f__Erysipelotrichaceae|g__Holdemanella|s__Holdemanella_SGB6796|t__SGB6796	0.0352945	70	70_1	Bacteria	Firmicutes	Bacilli	Erysipelotrichales	Erysipelotrichaceae	Holdemanella	porci	Group_70
s_9002000001280218_40.permissive	95.55	0.71	0	1819956	14514	uSGB_6796	Genus	k__Bacteria|p__Firmicutes|c__Erysipelotrichia|o__Erysipelotrichales|f__Erysipelotrichaceae|g__Holdemanella|s__Holdemanella_SGB6796|t__SGB6796	0.0263807	70	70_12	Bacteria	Firmicutes	Bacilli	Erysipelotrichales	Erysipelotrichaceae	Holdemanella	porci	Group_70
s_9002000001295079_1.permissive	96.5	1.65	0	2104803	24349	uSGB_6796	Genus	k__Bacteria|p__Firmicutes|c__Erysipelotrichia|o__Erysipelotrichales|f__Erysipelotrichaceae|g__Holdemanella|s__Holdemanella_SGB6796|t__SGB6796	0.0305977	70	70_9	Bacteria	Firmicutes	Bacilli	Erysipelotrichales	Erysipelotrichaceae	Holdemanella	porci	Group_70
s_9002000001296684_3.strict	92.32	0.94	0	1546534	8949	uSGB_6796	Genus	k__Bacteria|p__Firmicutes|c__Erysipelotrichia|o__Erysipelotrichales|f__Erysipelotrichaceae|g__Holdemanella|s__Holdemanella_SGB6796|t__SGB6796	0.038669	70	70_6	Bacteria	Firmicutes	Bacilli	Erysipelotrichales	Erysipelotrichaceae	Holdemanella	porci	Group_70
s_9002000001334186_30.permissive	95.55	0.71	0	2027621	14361	uSGB_6796	Genus	k__Bacteria|p__Firmicutes|c__Erysipelotrichia|o__Erysipelotrichales|f__Erysipelotrichaceae|g__Holdemanella|s__Holdemanella_SGB6796|t__SGB6796	0.0298054	70	70_10	Bacteria	Firmicutes	Bacilli	Erysipelotrichales	Erysipelotrichaceae	Holdemanella	porci	Group_70
s_9002000001352980_1.strict	92.59	0	0	1699344	15174	uSGB_6796	Genus	k__Bacteria|p__Firmicutes|c__Erysipelotrichia|o__Erysipelotrichales|f__Erysipelotrichaceae|g__Holdemanella|s__Holdemanella_SGB6796|t__SGB6796	0.0371892	70	70_2	Bacteria	Firmicutes	Bacilli	Erysipelotrichales	Erysipelotrichaceae	Holdemanella	porci	Group_70
s_9002000001365670_8.strict	92.59	0.31	0	1608203	7497	uSGB_6796	Genus	k__Bacteria|p__Firmicutes|c__Erysipelotrichia|o__Erysipelotrichales|f__Erysipelotrichaceae|g__Holdemanella|s__Holdemanella_SGB6796|t__SGB6796	0.0370173	70	70_5	Bacteria	Firmicutes	Bacilli	Erysipelotrichales	Erysipelotrichaceae	Holdemanella	porci	Group_70
s_9002000001366751_13.strict	95.01	1.25	14.29	1943247	30831	uSGB_6796	Genus	k__Bacteria|p__Firmicutes|c__Erysipelotrichia|o__Erysipelotrichales|f__Erysipelotrichaceae|g__Holdemanella|s__Holdemanella_SGB6796|t__SGB6796	0.0262988	70	70_13	Bacteria	Firmicutes	Bacilli	Erysipelotrichales	Erysipelotrichaceae	Holdemanella	porci	Group_70
s_9002000001372130_39.permissive	95.42	0.71	0	1865173	13758	uSGB_6796	Genus	k__Bacteria|p__Firmicutes|c__Erysipelotrichia|o__Erysipelotrichales|f__Erysipelotrichaceae|g__Holdemanella|s__Holdemanella_SGB6796|t__SGB6796	0.0272463	70	70_17	Bacteria	Firmicutes	Bacilli	Erysipelotrichales	Erysipelotrichaceae	Holdemanella	porci	Group_70
s_9002000001377460_35.permissive	92.72	0.71	0	1995093	20989	uSGB_6796	Genus	k__Bacteria|p__Firmicutes|c__Erysipelotrichia|o__Erysipelotrichales|f__Erysipelotrichaceae|g__Holdemanella|s__Holdemanella_SGB6796|t__SGB6796	0.0280955	70	70_14	Bacteria	Firmicutes	Bacilli	Erysipelotrichales	Erysipelotrichaceae	Holdemanella	porci	Group_70
s_9002000001386478_12.strict	94.47	0	0	1634778	25561	uSGB_6796	Genus	k__Bacteria|p__Firmicutes|c__Erysipelotrichia|o__Erysipelotrichales|f__Erysipelotrichaceae|g__Holdemanella|s__Holdemanella_SGB6796|t__SGB6796	0.0368107	70	70_2	Bacteria	Firmicutes	Bacilli	Erysipelotrichales	Erysipelotrichaceae	Holdemanella	porci	Group_70
s_9002000001393561_1.permissive	93.67	0.71	0	1825564	17271	uSGB_6796	Genus	k__Bacteria|p__Firmicutes|c__Erysipelotrichia|o__Erysipelotrichales|f__Erysipelotrichaceae|g__Holdemanella|s__Holdemanella_SGB6796|t__SGB6796	0.0294136	70	70_8	Bacteria	Firmicutes	Bacilli	Erysipelotrichales	Erysipelotrichaceae	Holdemanella	porci	Group_70
s_9002000001400933_22.permissive	94.61	0.71	0	2036947	37425	uSGB_6796	Genus	k__Bacteria|p__Firmicutes|c__Erysipelotrichia|o__Erysipelotrichales|f__Erysipelotrichaceae|g__Holdemanella|s__Holdemanella_SGB6796|t__SGB6796	0.0339853	70	70_29	Bacteria	Firmicutes	Bacilli	Erysipelotrichales	Erysipelotrichaceae	Holdemanella	porci	Group_70
s_9002000001404066_29.permissive	95.55	0.71	0	2047322	14917	uSGB_6796	Genus	k__Bacteria|p__Firmicutes|c__Erysipelotrichia|o__Erysipelotrichales|f__Erysipelotrichaceae|g__Holdemanella|s__Holdemanella_SGB6796|t__SGB6796	0.0297391	70	70_25	Bacteria	Firmicutes	Bacilli	Erysipelotrichales	Erysipelotrichaceae	Holdemanella	porci	Group_70
s_9002000001406680_3.strict	96.63	0.71	0	1792758	28165	uSGB_6796	Genus	k__Bacteria|p__Firmicutes|c__Erysipelotrichia|o__Erysipelotrichales|f__Erysipelotrichaceae|g__Holdemanella|s__Holdemanella_SGB6796|t__SGB6796	0.0363003	70	70_1	Bacteria	Firmicutes	Bacilli	Erysipelotrichales	Erysipelotrichaceae	Holdemanella	porci	Group_70
s_9002000001435550_16.strict	92.72	0.71	0	1975557	10158	uSGB_6796	Genus	k__Bacteria|p__Firmicutes|c__Erysipelotrichia|o__Erysipelotrichales|f__Erysipelotrichaceae|g__Holdemanella|s__Holdemanella_SGB6796|t__SGB6796	0.0377667	70	70_31	Bacteria	Firmicutes	Bacilli	Erysipelotrichales	Erysipelotrichaceae	Holdemanella	porci	Group_70
s_9002000001439850_11.permissive	91.31	0.71	0	1852417	8455	uSGB_6796	Genus	k__Bacteria|p__Firmicutes|c__Erysipelotrichia|o__Erysipelotrichales|f__Erysipelotrichaceae|g__Holdemanella|s__Holdemanella_SGB6796|t__SGB6796	0.0280518	70	70_27	Bacteria	Firmicutes	Bacilli	Erysipelotrichales	Erysipelotrichaceae	Holdemanella	porci	Group_70
s_9002000001446594_42.strict	97.44	0.71	0	2102221	17640	uSGB_6796	Genus	k__Bacteria|p__Firmicutes|c__Erysipelotrichia|o__Erysipelotrichales|f__Erysipelotrichaceae|g__Holdemanella|s__Holdemanella_SGB6796|t__SGB6796	0.0287862	70	70_22	Bacteria	Firmicutes	Bacilli	Erysipelotrichales	Erysipelotrichaceae	Holdemanella	porci	Group_70
s_9002000001447950_6.strict	91.64	0	0	1638630	17250	uSGB_6796	Genus	k__Bacteria|p__Firmicutes|c__Erysipelotrichia|o__Erysipelotrichales|f__Erysipelotrichaceae|g__Holdemanella|s__Holdemanella_SGB6796|t__SGB6796	0.0380499	70	70_4	Bacteria	Firmicutes	Bacilli	Erysipelotrichales	Erysipelotrichaceae	Holdemanella	porci	Group_70
s_9002000001452386_14.permissive	92.32	0.71	0	1797037	9540	uSGB_6796	Genus	k__Bacteria|p__Firmicutes|c__Erysipelotrichia|o__Erysipelotrichales|f__Erysipelotrichaceae|g__Holdemanella|s__Holdemanella_SGB6796|t__SGB6796	0.0274532	70	70_15	Bacteria	Firmicutes	Bacilli	Erysipelotrichales	Erysipelotrichaceae	Holdemanella	porci	Group_70
s_9002000001455931_18.permissive	96.63	0.71	0	1996520	21866	uSGB_6796	Genus	k__Bacteria|p__Firmicutes|c__Erysipelotrichia|o__Erysipelotrichales|f__Erysipelotrichaceae|g__Holdemanella|s__Holdemanella_SGB6796|t__SGB6796	0.0336305	70	70_30	Bacteria	Firmicutes	Bacilli	Erysipelotrichales	Erysipelotrichaceae	Holdemanella	porci	Group_70
s_9002000001504132_1.permissive	97.04	0.84	25	2113342	14636	uSGB_6796	Genus	k__Bacteria|p__Firmicutes|c__Erysipelotrichia|o__Erysipelotrichales|f__Erysipelotrichaceae|g__Holdemanella|s__Holdemanella_SGB6796|t__SGB6796	0.0293493	70	70_18	Bacteria	Firmicutes	Bacilli	Erysipelotrichales	Erysipelotrichaceae	Holdemanella	porci	Group_70
s_9002000001510130_12.strict	95.55	0.84	25	1899503	12292	uSGB_6796	Genus	k__Bacteria|p__Firmicutes|c__Erysipelotrichia|o__Erysipelotrichales|f__Erysipelotrichaceae|g__Holdemanella|s__Holdemanella_SGB6796|t__SGB6796	0.0277158	70	70_23	Bacteria	Firmicutes	Bacilli	Erysipelotrichales	Erysipelotrichaceae	Holdemanella	porci	Group_70
s_9002000001527647_16.strict	94.61	1.65	0	1913528	23383	uSGB_6796	Genus	k__Bacteria|p__Firmicutes|c__Erysipelotrichia|o__Erysipelotrichales|f__Erysipelotrichaceae|g__Holdemanella|s__Holdemanella_SGB6796|t__SGB6796	0.0275795	70	70_19	Bacteria	Firmicutes	Bacilli	Erysipelotrichales	Erysipelotrichaceae	Holdemanella	porci	Group_70
s_9002000001537510_32.permissive	92.72	0.71	0	1821521	12175	uSGB_6796	Genus	k__Bacteria|p__Firmicutes|c__Erysipelotrichia|o__Erysipelotrichales|f__Erysipelotrichaceae|g__Holdemanella|s__Holdemanella_SGB6796|t__SGB6796	0.0278532	70	70_21	Bacteria	Firmicutes	Bacilli	Erysipelotrichales	Erysipelotrichaceae	Holdemanella	porci	Group_70
s_2009000001576810_20.strict	90.23	1.65	0	1621051	6000	kSGB_6806	Species	k__Bacteria|p__Firmicutes|c__Erysipelotrichia|o__Erysipelotrichales|f__Erysipelotrichaceae|g__Holdemanella|s__Holdemanella_biformis|t__SGB6806	0.0337553	71	71_9	Bacteria	Firmicutes	Bacilli	Erysipelotrichales	Erysipelotrichaceae	Holdemanella	biformis	Group_71
s_9002000001212011_20.permissive	90.57	0.71	0	2098475	38723	kSGB_6806	Species	k__Bacteria|p__Firmicutes|c__Erysipelotrichia|o__Erysipelotrichales|f__Erysipelotrichaceae|g__Holdemanella|s__Holdemanella_biformis|t__SGB6806	0.0310527	71	71_12	Bacteria	Firmicutes	Bacilli	Erysipelotrichales	Erysipelotrichaceae	Holdemanella	biformis	Group_71
s_9002000001275760_5.permissive	93.8	0.71	0	2015969	18395	kSGB_6806	Species	k__Bacteria|p__Firmicutes|c__Erysipelotrichia|o__Erysipelotrichales|f__Erysipelotrichaceae|g__Holdemanella|s__Holdemanella_biformis|t__SGB6806	0.0323357	71	71_1	Bacteria	Firmicutes	Bacilli	Erysipelotrichales	Erysipelotrichaceae	Holdemanella	biformis	Group_71
s_9002000001295785_24.strict	93.67	0.71	0	2008705	36237	kSGB_6806	Species	k__Bacteria|p__Firmicutes|c__Erysipelotrichia|o__Erysipelotrichales|f__Erysipelotrichaceae|g__Holdemanella|s__Holdemanella_biformis|t__SGB6806	0.0313755	71	71_16	Bacteria	Firmicutes	Bacilli	Erysipelotrichales	Erysipelotrichaceae	Holdemanella	biformis	Group_71
s_9002000001305350_14.permissive	96.5	0.71	0	2086269	20588	kSGB_6806	Species	k__Bacteria|p__Firmicutes|c__Erysipelotrichia|o__Erysipelotrichales|f__Erysipelotrichaceae|g__Holdemanella|s__Holdemanella_biformis|t__SGB6806	0.0318449	71	71_6	Bacteria	Firmicutes	Bacilli	Erysipelotrichales	Erysipelotrichaceae	Holdemanella	biformis	Group_71
s_9002000001318745_11.strict	97.44	0	0	1927030	27804	kSGB_6806	Species	k__Bacteria|p__Firmicutes|c__Erysipelotrichia|o__Erysipelotrichales|f__Erysipelotrichaceae|g__Holdemanella|s__Holdemanella_biformis|t__SGB6806	0.0307131	71	71_13	Bacteria	Firmicutes	Bacilli	Erysipelotrichales	Erysipelotrichaceae	Holdemanella	biformis	Group_71
s_9002000001323502_22.strict	96.5	0.71	0	1955663	16052	kSGB_6806	Species	k__Bacteria|p__Firmicutes|c__Erysipelotrichia|o__Erysipelotrichales|f__Erysipelotrichaceae|g__Holdemanella|s__Holdemanella_biformis|t__SGB6806	0.0305908	71	71_3	Bacteria	Firmicutes	Bacilli	Erysipelotrichales	Erysipelotrichaceae	Holdemanella	biformis	Group_71
s_9002000001331184_30.permissive	95.55	0.71	0	1789890	17131	kSGB_6806	Species	k__Bacteria|p__Firmicutes|c__Erysipelotrichia|o__Erysipelotrichales|f__Erysipelotrichaceae|g__Holdemanella|s__Holdemanella_biformis|t__SGB6806	0.0292757	71	71_14	Bacteria	Firmicutes	Bacilli	Erysipelotrichales	Erysipelotrichaceae	Holdemanella	biformis	Group_71
s_9002000001338659_5.permissive	90.23	0.94	0	1748264	6628	kSGB_6806	Species	k__Bacteria|p__Firmicutes|c__Erysipelotrichia|o__Erysipelotrichales|f__Erysipelotrichaceae|g__Holdemanella|s__Holdemanella_biformis|t__SGB6806	0.0330826	71	71_4	Bacteria	Firmicutes	Bacilli	Erysipelotrichales	Erysipelotrichaceae	Holdemanella	biformis	Group_71
s_9002000001341467_25.strict	97.44	0.71	0	2035016	21196	kSGB_6806	Species	k__Bacteria|p__Firmicutes|c__Erysipelotrichia|o__Erysipelotrichales|f__Erysipelotrichaceae|g__Holdemanella|s__Holdemanella_biformis|t__SGB6806	0.0309442	71	71_2	Bacteria	Firmicutes	Bacilli	Erysipelotrichales	Erysipelotrichaceae	Holdemanella	biformis	Group_71
s_9002000001373308_14.strict	94.47	0.8	0	1803335	9095	kSGB_6806	Species	k__Bacteria|p__Firmicutes|c__Erysipelotrichia|o__Erysipelotrichales|f__Erysipelotrichaceae|g__Holdemanella|s__Holdemanella_biformis|t__SGB6806	0.0311655	71	71_7	Bacteria	Firmicutes	Bacilli	Erysipelotrichales	Erysipelotrichaceae	Holdemanella	biformis	Group_71
s_9002000001377630_8.permissive	92.59	0.71	0	1749342	7362	kSGB_6806	Species	k__Bacteria|p__Firmicutes|c__Erysipelotrichia|o__Erysipelotrichales|f__Erysipelotrichaceae|g__Holdemanella|s__Holdemanella_biformis|t__SGB6806	0.0329055	71	71_11	Bacteria	Firmicutes	Bacilli	Erysipelotrichales	Erysipelotrichaceae	Holdemanella	biformis	Group_71
s_9002000001421399_3.strict	97.04	1.65	0	2091632	19424	kSGB_6806	Species	k__Bacteria|p__Firmicutes|c__Erysipelotrichia|o__Erysipelotrichales|f__Erysipelotrichaceae|g__Holdemanella|s__Holdemanella_biformis|t__SGB6806	0.0320782	71	71_10	Bacteria	Firmicutes	Bacilli	Erysipelotrichales	Erysipelotrichaceae	Holdemanella	biformis	Group_71
s_9002000001459770_28.strict	96.97	2.12	40	2270314	10716	kSGB_6806	Species	k__Bacteria|p__Firmicutes|c__Erysipelotrichia|o__Erysipelotrichales|f__Erysipelotrichaceae|g__Holdemanella|s__Holdemanella_biformis|t__SGB6806	0.0337971	71	71_17	Bacteria	Firmicutes	Bacilli	Erysipelotrichales	Erysipelotrichaceae	Holdemanella	biformis	Group_71
s_9002000001517364_28.strict	97.44	0.94	0	2088079	24610	kSGB_6806	Species	k__Bacteria|p__Firmicutes|c__Erysipelotrichia|o__Erysipelotrichales|f__Erysipelotrichaceae|g__Holdemanella|s__Holdemanella_biformis|t__SGB6806	0.0325089	71	71_5	Bacteria	Firmicutes	Bacilli	Erysipelotrichales	Erysipelotrichaceae	Holdemanella	biformis	Group_71
s_9002000001572713_20.strict	97.04	0.71	0	1991357	22475	kSGB_6806	Species	k__Bacteria|p__Firmicutes|c__Erysipelotrichia|o__Erysipelotrichales|f__Erysipelotrichaceae|g__Holdemanella|s__Holdemanella_biformis|t__SGB6806	0.0315724	71	71_8	Bacteria	Firmicutes	Bacilli	Erysipelotrichales	Erysipelotrichaceae	Holdemanella	biformis	Group_71
s_9002000001574290_3.strict	96.63	0	0	2209654	35393	kSGB_6806	Species	k__Bacteria|p__Firmicutes|c__Erysipelotrichia|o__Erysipelotrichales|f__Erysipelotrichaceae|g__Holdemanella|s__Holdemanella_biformis|t__SGB6806	0.0307823	71	71_15	Bacteria	Firmicutes	Bacilli	Erysipelotrichales	Erysipelotrichaceae	Holdemanella	biformis	Group_71
s_9002000001470400_20.permissive	94	0.84	25	1898702	14993	uSGB_6805	Genus	k__Bacteria|p__Firmicutes|c__Erysipelotrichia|o__Erysipelotrichales|f__Erysipelotrichaceae|g__Holdemanella|s__Holdemanella_SGB6805|t__SGB6805	0.0275733	72	72_0	Bacteria	Firmicutes	Bacilli	Erysipelotrichales	Erysipelotrichaceae	Holdemanella	sp900547815	Group_72
s_9002000001484586_19.permissive	95.42	1.18	0	1923787	8030	uSGB_6816	Genus	k__Bacteria|p__Firmicutes|c__Erysipelotrichia|o__Erysipelotrichales|f__Erysipelotrichaceae|g__Holdemanella|s__Holdemanella_SGB6816|t__SGB6816	0.0237719	73	73_0	Bacteria	Firmicutes	Bacilli	Erysipelotrichales	Erysipelotrichaceae	Holdemanella	sp003458715	Group_73
s_9002000001203943_25.permissive	99.3	0.52	0	1770549	23950	kSGB_7076	Species	k__Bacteria|p__Firmicutes|c__Bacilli|o__Lactobacillales|f__Lactobacillaceae|g__Lactobacillus|s__Lactobacillus_animalis|t__SGB7076	0.00981345	74	74_0	Bacteria	Firmicutes	Bacilli	Lactobacillales	Lactobacillaceae	Ligilactobacillus	animalis	Group_74
s_9002000001445668_26.permissive	94.85	0.52	0	1902894	16852	kSGB_7061	Species	k__Bacteria|p__Firmicutes|c__Bacilli|o__Lactobacillales|f__Lactobacillaceae|g__Lactobacillus|s__Lactobacillus_ruminis|t__SGB7061	0.0285144	75	75_0	Bacteria	Firmicutes	Bacilli	Lactobacillales	Lactobacillaceae	Ligilactobacillus	ruminis	Group_75
s_9002000001278828_8.strict	91.56	0	0	1930186	21638	uSGB_6836	Family	k__Bacteria|p__Firmicutes|c__Erysipelotrichia|o__Erysipelotrichales|f__Erysipelotrichaceae|g__GGB4887|s__GGB4887_SGB6836|t__SGB6836	0.0207121	76	76_1	Bacteria	Firmicutes	Bacilli	Erysipelotrichales	Erysipelotrichaceae	Bulleidia	sp900539965	Group_76
s_9002000001446594_18.permissive	91.43	0	0	1809154	18630	uSGB_6836	Family	k__Bacteria|p__Firmicutes|c__Erysipelotrichia|o__Erysipelotrichales|f__Erysipelotrichaceae|g__GGB4887|s__GGB4887_SGB6836|t__SGB6836	0.0196465	76	76_2	Bacteria	Firmicutes	Bacilli	Erysipelotrichales	Erysipelotrichaceae	Bulleidia	sp900539965	Group_76
s_9002000001565405_3.permissive	95.75	1.72	0	6306493	92451	kSGB_4987	Species	k__Bacteria|p__Firmicutes|c__Clostridia|o__Clostridiales|f__Clostridiaceae|g__Clostridium|s__Clostridium_sp_KLE_1755|t__SGB4987	0.0197176	77	77_0	Bacteria	Firmicutes_A	Clostridia	Lachnospirales	Lachnospiraceae	Eisenbergiella	porci	Group_77
s_9002000001187760_14.permissive	95.78	0.63	0	2458710	33266	kSGB_4874	Species	k__Bacteria|p__Firmicutes|c__Clostridia|o__Clostridiales|f__Lachnospiraceae|g__Fusicatenibacter|s__Fusicatenibacter_saccharivorans|t__SGB4874	0.024092	78	78_6	Bacteria	Firmicutes_A	Clostridia	Lachnospirales	Lachnospiraceae	Fusicatenibacter	saccharivorans	Group_78
s_9002000001200638_30.permissive	94.51	0.63	0	2630745	51998	kSGB_4874	Species	k__Bacteria|p__Firmicutes|c__Clostridia|o__Clostridiales|f__Lachnospiraceae|g__Fusicatenibacter|s__Fusicatenibacter_saccharivorans|t__SGB4874	0.0231191	78	78_32	Bacteria	Firmicutes_A	Clostridia	Lachnospirales	Lachnospiraceae	Fusicatenibacter	saccharivorans	Group_78
s_9002000001202875_21.strict	94.51	0.32	0	2793715	70101	kSGB_4874	Species	k__Bacteria|p__Firmicutes|c__Clostridia|o__Clostridiales|f__Lachnospiraceae|g__Fusicatenibacter|s__Fusicatenibacter_saccharivorans|t__SGB4874	0.0231874	78	78_28	Bacteria	Firmicutes_A	Clostridia	Lachnospirales	Lachnospiraceae	Fusicatenibacter	saccharivorans	Group_78
s_9002000001203943_23.permissive	94.51	0.63	0	2971767	97990	kSGB_4874	Species	k__Bacteria|p__Firmicutes|c__Clostridia|o__Clostridiales|f__Lachnospiraceae|g__Fusicatenibacter|s__Fusicatenibacter_saccharivorans|t__SGB4874	0.0247055	78	78_31	Bacteria	Firmicutes_A	Clostridia	Lachnospirales	Lachnospiraceae	Fusicatenibacter	saccharivorans	Group_78
s_9002000001206711LL_33.strict	95.15	0.63	0	2687898	44455	kSGB_4874	Species	k__Bacteria|p__Firmicutes|c__Clostridia|o__Clostridiales|f__Lachnospiraceae|g__Fusicatenibacter|s__Fusicatenibacter_saccharivorans|t__SGB4874	0.0243676	78	78_23	Bacteria	Firmicutes_A	Clostridia	Lachnospirales	Lachnospiraceae	Fusicatenibacter	saccharivorans	Group_78
s_9002000001212011_29.strict	97.05	2.22	0	2659943	63993	kSGB_4874	Species	k__Bacteria|p__Firmicutes|c__Clostridia|o__Clostridiales|f__Lachnospiraceae|g__Fusicatenibacter|s__Fusicatenibacter_saccharivorans|t__SGB4874	0.0226278	78	78_34	Bacteria	Firmicutes_A	Clostridia	Lachnospirales	Lachnospiraceae	Fusicatenibacter	saccharivorans	Group_78
s_9002000001225234_28.strict	91.21	0	0	2603121	47429	kSGB_4874	Species	k__Bacteria|p__Firmicutes|c__Clostridia|o__Clostridiales|f__Lachnospiraceae|g__Fusicatenibacter|s__Fusicatenibacter_saccharivorans|t__SGB4874	0.0241999	78	78_40	Bacteria	Firmicutes_A	Clostridia	Lachnospirales	Lachnospiraceae	Fusicatenibacter	saccharivorans	Group_78
s_9002000001227892_8.orig	91.4	1.58	33.33	2316336	18630	kSGB_4874	Species	k__Bacteria|p__Firmicutes|c__Clostridia|o__Clostridiales|f__Lachnospiraceae|g__Fusicatenibacter|s__Fusicatenibacter_saccharivorans|t__SGB4874	0.0235488	78	78_19	Bacteria	Firmicutes_A	Clostridia	Lachnospirales	Lachnospiraceae	Fusicatenibacter	saccharivorans	Group_78
s_9002000001228076LL_26.strict	90.61	1.08	33.33	2404088	27712	kSGB_4874	Species	k__Bacteria|p__Firmicutes|c__Clostridia|o__Clostridiales|f__Lachnospiraceae|g__Fusicatenibacter|s__Fusicatenibacter_saccharivorans|t__SGB4874	0.0238795	78	78_48	Bacteria	Firmicutes_A	Clostridia	Lachnospirales	Lachnospiraceae	Fusicatenibacter	saccharivorans	Group_78
s_9002000001229707_2.strict	98.95	0.76	50	2648966	36118	kSGB_4874	Species	k__Bacteria|p__Firmicutes|c__Clostridia|o__Clostridiales|f__Lachnospiraceae|g__Fusicatenibacter|s__Fusicatenibacter_saccharivorans|t__SGB4874	0.0223051	78	78_36	Bacteria	Firmicutes_A	Clostridia	Lachnospirales	Lachnospiraceae	Fusicatenibacter	saccharivorans	Group_78
s_9002000001232275_24.permissive	90.02	1.58	0	2173761	12049	kSGB_4874	Species	k__Bacteria|p__Firmicutes|c__Clostridia|o__Clostridiales|f__Lachnospiraceae|g__Fusicatenibacter|s__Fusicatenibacter_saccharivorans|t__SGB4874	0.0246174	78	78_4	Bacteria	Firmicutes_A	Clostridia	Lachnospirales	Lachnospiraceae	Fusicatenibacter	saccharivorans	Group_78
s_9002000001232570LL_15.permissive	91.46	0.79	50	2371391	17917	kSGB_4874	Species	k__Bacteria|p__Firmicutes|c__Clostridia|o__Clostridiales|f__Lachnospiraceae|g__Fusicatenibacter|s__Fusicatenibacter_saccharivorans|t__SGB4874	0.0224989	78	78_26	Bacteria	Firmicutes_A	Clostridia	Lachnospirales	Lachnospiraceae	Fusicatenibacter	saccharivorans	Group_78
s_9002000001233352_11.strict	93.88	0.63	0	2490416	51660	kSGB_4874	Species	k__Bacteria|p__Firmicutes|c__Clostridia|o__Clostridiales|f__Lachnospiraceae|g__Fusicatenibacter|s__Fusicatenibacter_saccharivorans|t__SGB4874	0.0227513	78	78_35	Bacteria	Firmicutes_A	Clostridia	Lachnospirales	Lachnospiraceae	Fusicatenibacter	saccharivorans	Group_78
s_9002000001251234_7.strict	93.62	0.63	0	2677338	21541	kSGB_4874	Species	k__Bacteria|p__Firmicutes|c__Clostridia|o__Clostridiales|f__Lachnospiraceae|g__Fusicatenibacter|s__Fusicatenibacter_saccharivorans|t__SGB4874	0.0235845	78	78_29	Bacteria	Firmicutes_A	Clostridia	Lachnospirales	Lachnospiraceae	Fusicatenibacter	saccharivorans	Group_78
s_9002000001252044_35.permissive	97.05	0	0	2740608	80640	kSGB_4874	Species	k__Bacteria|p__Firmicutes|c__Clostridia|o__Clostridiales|f__Lachnospiraceae|g__Fusicatenibacter|s__Fusicatenibacter_saccharivorans|t__SGB4874	0.0233937	78	78_36	Bacteria	Firmicutes_A	Clostridia	Lachnospirales	Lachnospiraceae	Fusicatenibacter	saccharivorans	Group_78
s_9002000001260888_3.strict	93.99	1.27	50	2394150	28559	uSGB_4878	Family	k__Bacteria|p__Firmicutes|c__Clostridia|o__Clostridiales|f__Lachnospiraceae|g__GGB3609|s__GGB3609_SGB4878|t__SGB4878	0.181002	78	78_1	Bacteria	Firmicutes_A	Clostridia	Lachnospirales	Lachnospiraceae	Fusicatenibacter	saccharivorans	Group_78
s_9002000001270534_4.strict	96.81	0.63	0	2498418	29661	kSGB_4874	Species	k__Bacteria|p__Firmicutes|c__Clostridia|o__Clostridiales|f__Lachnospiraceae|g__Fusicatenibacter|s__Fusicatenibacter_saccharivorans|t__SGB4874	0.0236555	78	78_20	Bacteria	Firmicutes_A	Clostridia	Lachnospirales	Lachnospiraceae	Fusicatenibacter	saccharivorans	Group_78
s_9002000001282052_22.permissive	93.6	1.27	0	2652615	28570	kSGB_4874	Species	k__Bacteria|p__Firmicutes|c__Clostridia|o__Clostridiales|f__Lachnospiraceae|g__Fusicatenibacter|s__Fusicatenibacter_saccharivorans|t__SGB4874	0.0237856	78	78_23	Bacteria	Firmicutes_A	Clostridia	Lachnospirales	Lachnospiraceae	Fusicatenibacter	saccharivorans	Group_78
s_9002000001295598_32.permissive	94.83	1.9	66.67	2266337	18357	kSGB_4874	Species	k__Bacteria|p__Firmicutes|c__Clostridia|o__Clostridiales|f__Lachnospiraceae|g__Fusicatenibacter|s__Fusicatenibacter_saccharivorans|t__SGB4874	0.0233492	78	78_14	Bacteria	Firmicutes_A	Clostridia	Lachnospirales	Lachnospiraceae	Fusicatenibacter	saccharivorans	Group_78
s_9002000001296209_21.permissive	91.98	1.27	0	2034833	19606	kSGB_4874	Species	k__Bacteria|p__Firmicutes|c__Clostridia|o__Clostridiales|f__Lachnospiraceae|g__Fusicatenibacter|s__Fusicatenibacter_saccharivorans|t__SGB4874	0.024809	78	78_38	Bacteria	Firmicutes_A	Clostridia	Lachnospirales	Lachnospiraceae	Fusicatenibacter	saccharivorans	Group_78
s_9002000001303715_29.orig	91.72	0	0	2408458	23877	kSGB_4874	Species	k__Bacteria|p__Firmicutes|c__Clostridia|o__Clostridiales|f__Lachnospiraceae|g__Fusicatenibacter|s__Fusicatenibacter_saccharivorans|t__SGB4874	0.022243	78	78_28	Bacteria	Firmicutes_A	Clostridia	Lachnospirales	Lachnospiraceae	Fusicatenibacter	saccharivorans	Group_78
s_9002000001319297_23.permissive	91.35	0	0	2380129	34503	kSGB_4874	Species	k__Bacteria|p__Firmicutes|c__Clostridia|o__Clostridiales|f__Lachnospiraceae|g__Fusicatenibacter|s__Fusicatenibacter_saccharivorans|t__SGB4874	0.0226086	78	78_29	Bacteria	Firmicutes_A	Clostridia	Lachnospirales	Lachnospiraceae	Fusicatenibacter	saccharivorans	Group_78
s_9002000001331184_24.strict	92.14	0.79	50	2219562	17592	kSGB_4874	Species	k__Bacteria|p__Firmicutes|c__Clostridia|o__Clostridiales|f__Lachnospiraceae|g__Fusicatenibacter|s__Fusicatenibacter_saccharivorans|t__SGB4874	0.0227278	78	78_39	Bacteria	Firmicutes_A	Clostridia	Lachnospirales	Lachnospiraceae	Fusicatenibacter	saccharivorans	Group_78
s_9002000001352086_40.permissive	95.38	0.63	0	2478413	35017	kSGB_4874	Species	k__Bacteria|p__Firmicutes|c__Clostridia|o__Clostridiales|f__Lachnospiraceae|g__Fusicatenibacter|s__Fusicatenibacter_saccharivorans|t__SGB4874	0.0234581	78	78_12	Bacteria	Firmicutes_A	Clostridia	Lachnospirales	Lachnospiraceae	Fusicatenibacter	saccharivorans	Group_78
s_9002000001352282_16.permissive	91.03	0.63	0	2458655	34301	kSGB_4874	Species	k__Bacteria|p__Firmicutes|c__Clostridia|o__Clostridiales|f__Lachnospiraceae|g__Fusicatenibacter|s__Fusicatenibacter_saccharivorans|t__SGB4874	0.0228574	78	78_33	Bacteria	Firmicutes_A	Clostridia	Lachnospirales	Lachnospiraceae	Fusicatenibacter	saccharivorans	Group_78
s_9002000001361192_23.permissive	96.73	0.63	0	2946763	84998	kSGB_4874	Species	k__Bacteria|p__Firmicutes|c__Clostridia|o__Clostridiales|f__Lachnospiraceae|g__Fusicatenibacter|s__Fusicatenibacter_saccharivorans|t__SGB4874	0.0232648	78	78_24	Bacteria	Firmicutes_A	Clostridia	Lachnospirales	Lachnospiraceae	Fusicatenibacter	saccharivorans	Group_78
s_9002000001367051_6.permissive	90.79	0.63	0	2115441	19108	kSGB_4874	Species	k__Bacteria|p__Firmicutes|c__Clostridia|o__Clostridiales|f__Lachnospiraceae|g__Fusicatenibacter|s__Fusicatenibacter_saccharivorans|t__SGB4874	0.0227601	78	78_10	Bacteria	Firmicutes_A	Clostridia	Lachnospirales	Lachnospiraceae	Fusicatenibacter	saccharivorans	Group_78
s_9002000001371690_1.permissive	92.53	1.48	25	2417582	24523	kSGB_4874	Species	k__Bacteria|p__Firmicutes|c__Clostridia|o__Clostridiales|f__Lachnospiraceae|g__Fusicatenibacter|s__Fusicatenibacter_saccharivorans|t__SGB4874	0.0240006	78	78_46	Bacteria	Firmicutes_A	Clostridia	Lachnospirales	Lachnospiraceae	Fusicatenibacter	saccharivorans	Group_78
s_9002000001375980_12.permissive	93.78	0.63	0	2592535	28097	kSGB_4874	Species	k__Bacteria|p__Firmicutes|c__Clostridia|o__Clostridiales|f__Lachnospiraceae|g__Fusicatenibacter|s__Fusicatenibacter_saccharivorans|t__SGB4874	0.0229404	78	78_37	Bacteria	Firmicutes_A	Clostridia	Lachnospirales	Lachnospiraceae	Fusicatenibacter	saccharivorans	Group_78
s_9002000001380545_29.strict	96.41	0.63	0	2777357	79385	kSGB_4874	Species	k__Bacteria|p__Firmicutes|c__Clostridia|o__Clostridiales|f__Lachnospiraceae|g__Fusicatenibacter|s__Fusicatenibacter_saccharivorans|t__SGB4874	0.0244248	78	78_49	Bacteria	Firmicutes_A	Clostridia	Lachnospirales	Lachnospiraceae	Fusicatenibacter	saccharivorans	Group_78
s_9002000001385621_36.permissive	98.31	1.16	0	2775509	47828	kSGB_4874	Species	k__Bacteria|p__Firmicutes|c__Clostridia|o__Clostridiales|f__Lachnospiraceae|g__Fusicatenibacter|s__Fusicatenibacter_saccharivorans|t__SGB4874	0.0233978	78	78_18	Bacteria	Firmicutes_A	Clostridia	Lachnospirales	Lachnospiraceae	Fusicatenibacter	saccharivorans	Group_78
s_9002000001386478_11.strict	91.84	0.63	0	2361859	22935	kSGB_4874	Species	k__Bacteria|p__Firmicutes|c__Clostridia|o__Clostridiales|f__Lachnospiraceae|g__Fusicatenibacter|s__Fusicatenibacter_saccharivorans|t__SGB4874	0.0238188	78	78_8	Bacteria	Firmicutes_A	Clostridia	Lachnospirales	Lachnospiraceae	Fusicatenibacter	saccharivorans	Group_78
s_9002000001387200_15.strict	92.9	0.63	0	2442410	77890	kSGB_4874	Species	k__Bacteria|p__Firmicutes|c__Clostridia|o__Clostridiales|f__Lachnospiraceae|g__Fusicatenibacter|s__Fusicatenibacter_saccharivorans|t__SGB4874	0.0227546	78	78_43	Bacteria	Firmicutes_A	Clostridia	Lachnospirales	Lachnospiraceae	Fusicatenibacter	saccharivorans	Group_78
s_9002000001388561_3.permissive	94.51	1.33	40	2537827	28353	kSGB_4874	Species	k__Bacteria|p__Firmicutes|c__Clostridia|o__Clostridiales|f__Lachnospiraceae|g__Fusicatenibacter|s__Fusicatenibacter_saccharivorans|t__SGB4874	0.0230864	78	78_16	Bacteria	Firmicutes_A	Clostridia	Lachnospirales	Lachnospiraceae	Fusicatenibacter	saccharivorans	Group_78
s_9002000001392617_27.permissive	95.46	0.63	0	2523834	31695	kSGB_4874	Species	k__Bacteria|p__Firmicutes|c__Clostridia|o__Clostridiales|f__Lachnospiraceae|g__Fusicatenibacter|s__Fusicatenibacter_saccharivorans|t__SGB4874	0.0224754	78	78_47	Bacteria	Firmicutes_A	Clostridia	Lachnospirales	Lachnospiraceae	Fusicatenibacter	saccharivorans	Group_78
s_9002000001395260_32.permissive	96.62	0.63	0	2676117	41438	kSGB_4874	Species	k__Bacteria|p__Firmicutes|c__Clostridia|o__Clostridiales|f__Lachnospiraceae|g__Fusicatenibacter|s__Fusicatenibacter_saccharivorans|t__SGB4874	0.0245986	78	78_5	Bacteria	Firmicutes_A	Clostridia	Lachnospirales	Lachnospiraceae	Fusicatenibacter	saccharivorans	Group_78
s_9002000001398120_8.strict	92.3	0.63	0	2435468	44243	kSGB_4874	Species	k__Bacteria|p__Firmicutes|c__Clostridia|o__Clostridiales|f__Lachnospiraceae|g__Fusicatenibacter|s__Fusicatenibacter_saccharivorans|t__SGB4874	0.0219518	78	78_30	Bacteria	Firmicutes_A	Clostridia	Lachnospirales	Lachnospiraceae	Fusicatenibacter	saccharivorans	Group_78
s_9002000001399800_8.permissive	94.43	0.63	100	2136665	15486	kSGB_4874	Species	k__Bacteria|p__Firmicutes|c__Clostridia|o__Clostridiales|f__Lachnospiraceae|g__Fusicatenibacter|s__Fusicatenibacter_saccharivorans|t__SGB4874	0.0238174	78	78_13	Bacteria	Firmicutes_A	Clostridia	Lachnospirales	Lachnospiraceae	Fusicatenibacter	saccharivorans	Group_78
s_9002000001401430_23.permissive	92.62	0	0	2444207	28759	kSGB_4874	Species	k__Bacteria|p__Firmicutes|c__Clostridia|o__Clostridiales|f__Lachnospiraceae|g__Fusicatenibacter|s__Fusicatenibacter_saccharivorans|t__SGB4874	0.0241259	78	78_41	Bacteria	Firmicutes_A	Clostridia	Lachnospirales	Lachnospiraceae	Fusicatenibacter	saccharivorans	Group_78
s_9002000001414420_18.permissive	94.42	0.63	0	2382877	27285	kSGB_4874	Species	k__Bacteria|p__Firmicutes|c__Clostridia|o__Clostridiales|f__Lachnospiraceae|g__Fusicatenibacter|s__Fusicatenibacter_saccharivorans|t__SGB4874	0.0238598	78	78_15	Bacteria	Firmicutes_A	Clostridia	Lachnospirales	Lachnospiraceae	Fusicatenibacter	saccharivorans	Group_78
s_9002000001421826_22.permissive	91.32	1.27	50	2270259	18821	kSGB_4874	Species	k__Bacteria|p__Firmicutes|c__Clostridia|o__Clostridiales|f__Lachnospiraceae|g__Fusicatenibacter|s__Fusicatenibacter_saccharivorans|t__SGB4874	0.0223976	78	78_25	Bacteria	Firmicutes_A	Clostridia	Lachnospirales	Lachnospiraceae	Fusicatenibacter	saccharivorans	Group_78
s_9002000001424256_12.permissive	93.7	0.76	100	2163290	11467	kSGB_4874	Species	k__Bacteria|p__Firmicutes|c__Clostridia|o__Clostridiales|f__Lachnospiraceae|g__Fusicatenibacter|s__Fusicatenibacter_saccharivorans|t__SGB4874	0.0242981	78	78_17	Bacteria	Firmicutes_A	Clostridia	Lachnospirales	Lachnospiraceae	Fusicatenibacter	saccharivorans	Group_78
s_9002000001436220_32.permissive	94.73	1.58	0	2655068	26046	kSGB_4874	Species	k__Bacteria|p__Firmicutes|c__Clostridia|o__Clostridiales|f__Lachnospiraceae|g__Fusicatenibacter|s__Fusicatenibacter_saccharivorans|t__SGB4874	0.0230637	78	78_3	Bacteria	Firmicutes_A	Clostridia	Lachnospirales	Lachnospiraceae	Fusicatenibacter	saccharivorans	Group_78
s_9002000001438180_20.orig	93.88	0.63	0	2791401	35171	kSGB_4874	Species	k__Bacteria|p__Firmicutes|c__Clostridia|o__Clostridiales|f__Lachnospiraceae|g__Fusicatenibacter|s__Fusicatenibacter_saccharivorans|t__SGB4874	0.0245688	78	78_24	Bacteria	Firmicutes_A	Clostridia	Lachnospirales	Lachnospiraceae	Fusicatenibacter	saccharivorans	Group_78
s_9002000001463497_34.strict	94.35	0.63	0	2489519	43459	kSGB_4874	Species	k__Bacteria|p__Firmicutes|c__Clostridia|o__Clostridiales|f__Lachnospiraceae|g__Fusicatenibacter|s__Fusicatenibacter_saccharivorans|t__SGB4874	0.02259	78	78_44	Bacteria	Firmicutes_A	Clostridia	Lachnospirales	Lachnospiraceae	Fusicatenibacter	saccharivorans	Group_78
s_9002000001467905_10.permissive	97.68	0.63	0	2743542	68040	kSGB_4874	Species	k__Bacteria|p__Firmicutes|c__Clostridia|o__Clostridiales|f__Lachnospiraceae|g__Fusicatenibacter|s__Fusicatenibacter_saccharivorans|t__SGB4874	0.0240883	78	78_9	Bacteria	Firmicutes_A	Clostridia	Lachnospirales	Lachnospiraceae	Fusicatenibacter	saccharivorans	Group_78
s_9002000001475729LL_7.permissive	90.7	0.63	0	2384754	26109	kSGB_4874	Species	k__Bacteria|p__Firmicutes|c__Clostridia|o__Clostridiales|f__Lachnospiraceae|g__Fusicatenibacter|s__Fusicatenibacter_saccharivorans|t__SGB4874	0.023892	78	78_41	Bacteria	Firmicutes_A	Clostridia	Lachnospirales	Lachnospiraceae	Fusicatenibacter	saccharivorans	Group_78
s_9002000001476065_2.permissive	94.63	1.27	50	2326449	20112	kSGB_4874	Species	k__Bacteria|p__Firmicutes|c__Clostridia|o__Clostridiales|f__Lachnospiraceae|g__Fusicatenibacter|s__Fusicatenibacter_saccharivorans|t__SGB4874	0.0232768	78	78_11	Bacteria	Firmicutes_A	Clostridia	Lachnospirales	Lachnospiraceae	Fusicatenibacter	saccharivorans	Group_78
s_9002000001484586_10.strict	97.41	1.37	0	2822419	55285	kSGB_4874	Species	k__Bacteria|p__Firmicutes|c__Clostridia|o__Clostridiales|f__Lachnospiraceae|g__Fusicatenibacter|s__Fusicatenibacter_saccharivorans|t__SGB4874	0.0243284	78	78_22	Bacteria	Firmicutes_A	Clostridia	Lachnospirales	Lachnospiraceae	Fusicatenibacter	saccharivorans	Group_78
s_9002000001497216_8.strict	95.84	0.63	0	2733560	63424	kSGB_4874	Species	k__Bacteria|p__Firmicutes|c__Clostridia|o__Clostridiales|f__Lachnospiraceae|g__Fusicatenibacter|s__Fusicatenibacter_saccharivorans|t__SGB4874	0.0232788	78	78_42	Bacteria	Firmicutes_A	Clostridia	Lachnospirales	Lachnospiraceae	Fusicatenibacter	saccharivorans	Group_78
s_9002000001501892_22.permissive	91.38	1.58	0	2472086	29043	kSGB_4874	Species	k__Bacteria|p__Firmicutes|c__Clostridia|o__Clostridiales|f__Lachnospiraceae|g__Fusicatenibacter|s__Fusicatenibacter_saccharivorans|t__SGB4874	0.0233726	78	78_27	Bacteria	Firmicutes_A	Clostridia	Lachnospirales	Lachnospiraceae	Fusicatenibacter	saccharivorans	Group_78
s_9002000001510130_16.permissive	90.78	0.95	0	2315360	11013	kSGB_4874	Species	k__Bacteria|p__Firmicutes|c__Clostridia|o__Clostridiales|f__Lachnospiraceae|g__Fusicatenibacter|s__Fusicatenibacter_saccharivorans|t__SGB4874	0.024813	78	78_50	Bacteria	Firmicutes_A	Clostridia	Lachnospirales	Lachnospiraceae	Fusicatenibacter	saccharivorans	Group_78
s_9002000001527647_8.permissive	91.98	0.63	100	2416662	37370	kSGB_4874	Species	k__Bacteria|p__Firmicutes|c__Clostridia|o__Clostridiales|f__Lachnospiraceae|g__Fusicatenibacter|s__Fusicatenibacter_saccharivorans|t__SGB4874	0.0234515	78	78_13	Bacteria	Firmicutes_A	Clostridia	Lachnospirales	Lachnospiraceae	Fusicatenibacter	saccharivorans	Group_78
s_9002000001531363_16.permissive	96.92	0.63	0	2688543	56958	kSGB_4874	Species	k__Bacteria|p__Firmicutes|c__Clostridia|o__Clostridiales|f__Lachnospiraceae|g__Fusicatenibacter|s__Fusicatenibacter_saccharivorans|t__SGB4874	0.0241339	78	78_7	Bacteria	Firmicutes_A	Clostridia	Lachnospirales	Lachnospiraceae	Fusicatenibacter	saccharivorans	Group_78
s_9002000001566660_27.permissive	90.4	1.11	25	2492990	20412	kSGB_4874	Species	k__Bacteria|p__Firmicutes|c__Clostridia|o__Clostridiales|f__Lachnospiraceae|g__Fusicatenibacter|s__Fusicatenibacter_saccharivorans|t__SGB4874	0.0236708	78	78_21	Bacteria	Firmicutes_A	Clostridia	Lachnospirales	Lachnospiraceae	Fusicatenibacter	saccharivorans	Group_78
s_9002000001572713_48.orig	91.52	0.63	0	2130715	18539	kSGB_4874	Species	k__Bacteria|p__Firmicutes|c__Clostridia|o__Clostridiales|f__Lachnospiraceae|g__Fusicatenibacter|s__Fusicatenibacter_saccharivorans|t__SGB4874	0.0238384	78	78_45	Bacteria	Firmicutes_A	Clostridia	Lachnospirales	Lachnospiraceae	Fusicatenibacter	saccharivorans	Group_78
s_9002000001577850_9.strict	90.72	0.63	0	2401772	60597	kSGB_4874	Species	k__Bacteria|p__Firmicutes|c__Clostridia|o__Clostridiales|f__Lachnospiraceae|g__Fusicatenibacter|s__Fusicatenibacter_saccharivorans|t__SGB4874	0.0247578	78	78_2	Bacteria	Firmicutes_A	Clostridia	Lachnospirales	Lachnospiraceae	Fusicatenibacter	saccharivorans	Group_78
s_9002000001317659_5.strict	92.13	1.61	0	1859527	17398	uSGB_14816	Family	k__Bacteria|p__Actinobacteria|c__Coriobacteriia|o__Eggerthellales|f__Eggerthellaceae|g__GGB9436|s__GGB9436_SGB14816|t__SGB14816	0.0372192	79	79_0	Bacteria	Actinobacteriota	Coriobacteriia	Coriobacteriales	Eggerthellaceae	Ellagibacter	isourolithinifaciens	Group_79
s_9002000001442595_21.permissive	97.38	0.81	33.33	3118963	26823	kSGB_14809	Species	k__Bacteria|p__Actinobacteria|c__Coriobacteriia|o__Eggerthellales|f__Eggerthellaceae|g__Eggerthella|s__Eggerthella_lenta|t__SGB14809	0.0201625	80	80_0	Bacteria	Actinobacteriota	Coriobacteriia	Coriobacteriales	Eggerthellaceae	Eggerthella	lenta	Group_80
s_9002000001179490_11.permissive	91.81	0.99	0	2031870	27537	kSGB_5906	Species	k__Bacteria|p__Firmicutes|c__Negativicutes|o__Selenomonadales|f__Selenomonadaceae|g__Mitsuokella|s__Mitsuokella_multacida|t__SGB5906	0.0348635	81	81_0	Bacteria	Firmicutes_C	Negativicutes	Selenomonadales	Selenomonadaceae	Mitsuokella	multacida	Group_81
s_9002000001244042_35.permissive	95.16	0	0	2250560	38747	kSGB_14737	Species	k__Bacteria|p__Actinobacteria|c__Coriobacteriia|o__Coriobacteriales|f__Coriobacteriaceae|g__Collinsella|s__Collinsella_tanakaei|t__SGB14737	0.0303488	82	82_0	Bacteria	Actinobacteriota	Coriobacteriia	Coriobacteriales	Coriobacteriaceae	Collinsella	tanakaei	Group_82
s_9002000001361192_5.strict	97.5	0.81	0	2144810	13007	kSGB_14749	Species	k__Bacteria|p__Actinobacteria|c__Coriobacteriia|o__Coriobacteriales|f__Coriobacteriaceae|g__Enorma|s__Enorma_massiliensis|t__SGB14749	0.0297831	83	83_0	Bacteria	Actinobacteriota	Coriobacteriia	Coriobacteriales	Coriobacteriaceae	Enorma	massiliensis	Group_83
s_9002000001264644_19.strict	99.19	0	0	1813675	81263	kSGB_14741	Species	k__Bacteria|p__Actinobacteria|c__Coriobacteriia|o__Coriobacteriales|f__Coriobacteriaceae|g__Collinsella|s__Collinsella_intestinalis|t__SGB14741	0.0311105	84	84_1	Bacteria	Actinobacteriota	Coriobacteriia	Coriobacteriales	Coriobacteriaceae	Collinsella	intestinalis	Group_84
s_9002000001589917_10.strict	93.11	0.81	0	1613306	22008	kSGB_14741	Species	k__Bacteria|p__Actinobacteria|c__Coriobacteriia|o__Coriobacteriales|f__Coriobacteriaceae|g__Collinsella|s__Collinsella_intestinalis|t__SGB14741	0.0308048	84	84_2	Bacteria	Actinobacteriota	Coriobacteriia	Coriobacteriales	Coriobacteriaceae	Collinsella	intestinalis	Group_84
s_2009000001589950_5.permissive	93.41	0.81	0	1886466	12911	uSGB_14470	Genus	k__Bacteria|p__Actinobacteria|c__Coriobacteriia|o__Coriobacteriales|f__Coriobacteriaceae|g__Collinsella|s__Collinsella_SGB14470|t__SGB14470	0.0438606	85	85_1	Bacteria	Actinobacteriota	Coriobacteriia	Coriobacteriales	Coriobacteriaceae	Collinsella		Group_85
s_9002000001372130_27.strict	91.28	1.61	50	1898561	29244	uSGB_14470	Genus	k__Bacteria|p__Actinobacteria|c__Coriobacteriia|o__Coriobacteriales|f__Coriobacteriaceae|g__Collinsella|s__Collinsella_SGB14470|t__SGB14470	0.0436738	85	85_3	Bacteria	Actinobacteriota	Coriobacteriia	Coriobacteriales	Coriobacteriaceae	Collinsella		Group_85
s_9002000001462284_27.permissive	94.62	0	0	1913580	64873	uSGB_14470	Genus	k__Bacteria|p__Actinobacteria|c__Coriobacteriia|o__Coriobacteriales|f__Coriobacteriaceae|g__Collinsella|s__Collinsella_SGB14470|t__SGB14470	0.0449116	85	85_2	Bacteria	Actinobacteriota	Coriobacteriia	Coriobacteriales	Coriobacteriaceae	Collinsella		Group_85
s_9002000001225234_3.permissive	100	0.81	0	2203063	128678	uSGB_14454	Genus	k__Bacteria|p__Actinobacteria|c__Coriobacteriia|o__Coriobacteriales|f__Coriobacteriaceae|g__Collinsella|s__Collinsella_SGB14454|t__SGB14454	0.0468263	86	86_6	Bacteria	Actinobacteriota	Coriobacteriia	Coriobacteriales	Coriobacteriaceae	Collinsella	sp003469185	Group_86
s_9002000001276538_33.permissive	94.24	0.81	0	1910755	25792	uSGB_14455	Genus	k__Bacteria|p__Actinobacteria|c__Coriobacteriia|o__Coriobacteriales|f__Coriobacteriaceae|g__Collinsella|s__Collinsella_SGB14455|t__SGB14455	0.0448126	86	86_3	Bacteria	Actinobacteriota	Coriobacteriia	Coriobacteriales	Coriobacteriaceae	Collinsella	sp003469185	Group_86
s_9002000001287540_13.orig	93.82	1.61	0	1941052	14282	uSGB_14454	Genus	k__Bacteria|p__Actinobacteria|c__Coriobacteriia|o__Coriobacteriales|f__Coriobacteriaceae|g__Collinsella|s__Collinsella_SGB14454|t__SGB14454	0.0447614	86	86_4	Bacteria	Actinobacteriota	Coriobacteriia	Coriobacteriales	Coriobacteriaceae	Collinsella	sp003469185	Group_86
s_9002000001454910_24.permissive	91.67	0.81	0	1873307	13427	uSGB_14454	Genus	k__Bacteria|p__Actinobacteria|c__Coriobacteriia|o__Coriobacteriales|f__Coriobacteriaceae|g__Collinsella|s__Collinsella_SGB14454|t__SGB14454	0.0465891	86	86_5	Bacteria	Actinobacteriota	Coriobacteriia	Coriobacteriales	Coriobacteriaceae	Collinsella	sp003469185	Group_86
s_9002000001467905_19.permissive	98.39	0.81	0	2060773	107364	uSGB_14454	Genus	k__Bacteria|p__Actinobacteria|c__Coriobacteriia|o__Coriobacteriales|f__Coriobacteriaceae|g__Collinsella|s__Collinsella_SGB14454|t__SGB14454	0.0454766	86	86_1	Bacteria	Actinobacteriota	Coriobacteriia	Coriobacteriales	Coriobacteriaceae	Collinsella	sp003469185	Group_86
s_9002000001515593_7.strict	99.19	0.81	0	2209202	238731	uSGB_14454	Genus	k__Bacteria|p__Actinobacteria|c__Coriobacteriia|o__Coriobacteriales|f__Coriobacteriaceae|g__Collinsella|s__Collinsella_SGB14454|t__SGB14454	0.0460604	86	86_7	Bacteria	Actinobacteriota	Coriobacteriia	Coriobacteriales	Coriobacteriaceae	Collinsella	sp003469185	Group_86
s_9002000001577190_13.permissive	97.58	0.81	0	2005088	73849	uSGB_14454	Genus	k__Bacteria|p__Actinobacteria|c__Coriobacteriia|o__Coriobacteriales|f__Coriobacteriaceae|g__Collinsella|s__Collinsella_SGB14454|t__SGB14454	0.0457952	86	86_2	Bacteria	Actinobacteriota	Coriobacteriia	Coriobacteriales	Coriobacteriaceae	Collinsella	sp003469185	Group_86
s_9002000001338480_14.strict	90.87	1.88	0	1922270	12760	uSGB_14441	Genus	k__Bacteria|p__Actinobacteria|c__Coriobacteriia|o__Coriobacteriales|f__Coriobacteriaceae|g__Collinsella|s__Collinsella_SGB14441|t__SGB14441	0.0466891	87	87_1	Bacteria	Actinobacteriota	Coriobacteriia	Coriobacteriales	Coriobacteriaceae	Collinsella	sp900541745	Group_87
s_9002000001435151_18.permissive	97.58	0.81	0	1942362	51682	uSGB_14441	Genus	k__Bacteria|p__Actinobacteria|c__Coriobacteriia|o__Coriobacteriales|f__Coriobacteriaceae|g__Collinsella|s__Collinsella_SGB14441|t__SGB14441	0.0474559	87	87_3	Bacteria	Actinobacteriota	Coriobacteriia	Coriobacteriales	Coriobacteriaceae	Collinsella	sp900541745	Group_87
s_9002000001446520_12.strict	96.77	0.81	0	2070073	41974	uSGB_14441	Genus	k__Bacteria|p__Actinobacteria|c__Coriobacteriia|o__Coriobacteriales|f__Coriobacteriaceae|g__Collinsella|s__Collinsella_SGB14441|t__SGB14441	0.0446223	87	87_2	Bacteria	Actinobacteriota	Coriobacteriia	Coriobacteriales	Coriobacteriaceae	Collinsella	sp900541745	Group_87
s_2009000001576810_29.permissive	94.15	0.81	0	1807720	16428	kSGB_14631	Species	k__Bacteria|p__Actinobacteria|c__Coriobacteriia|o__Coriobacteriales|f__Coriobacteriaceae|g__Collinsella|s__Collinsella_aerofaciens|t__SGB14631	0.0444562	88	88_42	Bacteria	Actinobacteriota	Coriobacteriia	Coriobacteriales	Coriobacteriaceae	Collinsella	sp900552385	Group_88
s_9002000001179490_2.strict	97.58	0.81	0	1998043	30001	uSGB_14632	Genus	k__Bacteria|p__Actinobacteria|c__Coriobacteriia|o__Coriobacteriales|f__Coriobacteriaceae|g__Collinsella|s__Collinsella_SGB14632|t__SGB14632	0.0439237	88	88_55	Bacteria	Actinobacteriota	Coriobacteriia	Coriobacteriales	Coriobacteriaceae	Collinsella	sp900552385	Group_88
s_9002000001186403_30.permissive	99.19	0.81	0	2086553	21602	kSGB_14631	Species	k__Bacteria|p__Actinobacteria|c__Coriobacteriia|o__Coriobacteriales|f__Coriobacteriaceae|g__Collinsella|s__Collinsella_aerofaciens|t__SGB14631	0.0448394	88	88_60	Bacteria	Actinobacteriota	Coriobacteriia	Coriobacteriales	Coriobacteriaceae	Collinsella	sp900552385	Group_88
s_9002000001191969_17.permissive	92.74	2.42	0	1901792	23458	kSGB_14631	Species	k__Bacteria|p__Actinobacteria|c__Coriobacteriia|o__Coriobacteriales|f__Coriobacteriaceae|g__Collinsella|s__Collinsella_aerofaciens|t__SGB14631	0.0452614	88	88_36	Bacteria	Actinobacteriota	Coriobacteriia	Coriobacteriales	Coriobacteriaceae	Collinsella	sp900552385	Group_88
s_9002000001206711LL_12.permissive	97.98	1.61	0	1960264	22762	kSGB_14631	Species	k__Bacteria|p__Actinobacteria|c__Coriobacteriia|o__Coriobacteriales|f__Coriobacteriaceae|g__Collinsella|s__Collinsella_aerofaciens|t__SGB14631	0.0429087	88	88_44	Bacteria	Actinobacteriota	Coriobacteriia	Coriobacteriales	Coriobacteriaceae	Collinsella	sp900552385	Group_88
s_9002000001225833_12.permissive	97.58	1.61	0	1963411	42766	kSGB_14631	Species	k__Bacteria|p__Actinobacteria|c__Coriobacteriia|o__Coriobacteriales|f__Coriobacteriaceae|g__Collinsella|s__Collinsella_aerofaciens|t__SGB14631	0.0443107	88	88_30	Bacteria	Actinobacteriota	Coriobacteriia	Coriobacteriales	Coriobacteriaceae	Collinsella	sp900552385	Group_88
s_9002000001226278LL_42.permissive	91.05	0.81	0	1909173	45302	kSGB_14631	Species	k__Bacteria|p__Actinobacteria|c__Coriobacteriia|o__Coriobacteriales|f__Coriobacteriaceae|g__Collinsella|s__Collinsella_aerofaciens|t__SGB14631	0.0459498	88	88_29	Bacteria	Actinobacteriota	Coriobacteriia	Coriobacteriales	Coriobacteriaceae	Collinsella	sp900552385	Group_88
s_9002000001227810_14.permissive	99.19	0.81	0	1922428	44498	uSGB_14585	Genus	k__Bacteria|p__Actinobacteria|c__Coriobacteriia|o__Coriobacteriales|f__Coriobacteriaceae|g__Collinsella|s__Collinsella_SGB14585|t__SGB14585	0.0450279	88	88_1	Bacteria	Actinobacteriota	Coriobacteriia	Coriobacteriales	Coriobacteriaceae	Collinsella	sp900552385	Group_88
s_9002000001234064_15.permissive	94.12	0.81	0	2107813	33044	kSGB_14631	Species	k__Bacteria|p__Actinobacteria|c__Coriobacteriia|o__Coriobacteriales|f__Coriobacteriaceae|g__Collinsella|s__Collinsella_aerofaciens|t__SGB14631	0.045516	88	88_21	Bacteria	Actinobacteriota	Coriobacteriia	Coriobacteriales	Coriobacteriaceae	Collinsella	sp900552385	Group_88
s_9002000001242988_17.orig	95.97	0.81	0	2029899	56806	kSGB_14631	Species	k__Bacteria|p__Actinobacteria|c__Coriobacteriia|o__Coriobacteriales|f__Coriobacteriaceae|g__Collinsella|s__Collinsella_aerofaciens|t__SGB14631	0.0461771	88	88_25	Bacteria	Actinobacteriota	Coriobacteriia	Coriobacteriales	Coriobacteriaceae	Collinsella	sp900552385	Group_88
s_9002000001243214_16.permissive	91.98	0	0	1850691	47528	kSGB_14631	Species	k__Bacteria|p__Actinobacteria|c__Coriobacteriia|o__Coriobacteriales|f__Coriobacteriaceae|g__Collinsella|s__Collinsella_aerofaciens|t__SGB14631	0.0474569	88	88_76	Bacteria	Actinobacteriota	Coriobacteriia	Coriobacteriales	Coriobacteriaceae	Collinsella	sp900552385	Group_88
s_9002000001244042_34.orig	99.19	3.23	0	2077918	68684	kSGB_14631	Species	k__Bacteria|p__Actinobacteria|c__Coriobacteriia|o__Coriobacteriales|f__Coriobacteriaceae|g__Collinsella|s__Collinsella_aerofaciens|t__SGB14631	0.0447538	88	88_52	Bacteria	Actinobacteriota	Coriobacteriia	Coriobacteriales	Coriobacteriaceae	Collinsella	sp900552385	Group_88
s_9002000001244089LL_7.permissive	94.53	0.81	0	1916014	56942	kSGB_14631	Species	k__Bacteria|p__Actinobacteria|c__Coriobacteriia|o__Coriobacteriales|f__Coriobacteriaceae|g__Collinsella|s__Collinsella_aerofaciens|t__SGB14631	0.0450345	88	88_52	Bacteria	Actinobacteriota	Coriobacteriia	Coriobacteriales	Coriobacteriaceae	Collinsella	sp900552385	Group_88
s_9002000001246252_45.permissive	96.77	0.81	0	1982648	48140	kSGB_14631	Species	k__Bacteria|p__Actinobacteria|c__Coriobacteriia|o__Coriobacteriales|f__Coriobacteriaceae|g__Collinsella|s__Collinsella_aerofaciens|t__SGB14631	0.0473066	88	88_80	Bacteria	Actinobacteriota	Coriobacteriia	Coriobacteriales	Coriobacteriaceae	Collinsella	sp900552385	Group_88
s_9002000001250148_6.strict	97.58	0.81	0	1992051	30345	uSGB_14589	Genus	k__Bacteria|p__Actinobacteria|c__Coriobacteriia|o__Coriobacteriales|f__Coriobacteriaceae|g__Collinsella|s__Collinsella_SGB14589|t__SGB14589	0.0432649	88	88_9	Bacteria	Actinobacteriota	Coriobacteriia	Coriobacteriales	Coriobacteriaceae	Collinsella	sp900552385	Group_88
s_9002000001253168_5.strict	97.58	0.81	0	2044845	58737	kSGB_14631	Species	k__Bacteria|p__Actinobacteria|c__Coriobacteriia|o__Coriobacteriales|f__Coriobacteriaceae|g__Collinsella|s__Collinsella_aerofaciens|t__SGB14631	0.0439017	88	88_40	Bacteria	Actinobacteriota	Coriobacteriia	Coriobacteriales	Coriobacteriaceae	Collinsella	sp900552385	Group_88
s_9002000001259288_19.strict	90.87	0.08	100	1839874	9495	kSGB_14631	Species	k__Bacteria|p__Actinobacteria|c__Coriobacteriia|o__Coriobacteriales|f__Coriobacteriaceae|g__Collinsella|s__Collinsella_aerofaciens|t__SGB14631	0.0459097	88	88_62	Bacteria	Actinobacteriota	Coriobacteriia	Coriobacteriales	Coriobacteriaceae	Collinsella	sp900552385	Group_88
s_9002000001265946_11.permissive	100	0.81	0	2074621	98487	uSGB_14589	Genus	k__Bacteria|p__Actinobacteria|c__Coriobacteriia|o__Coriobacteriales|f__Coriobacteriaceae|g__Collinsella|s__Collinsella_SGB14589|t__SGB14589	0.0434868	88	88_8	Bacteria	Actinobacteriota	Coriobacteriia	Coriobacteriales	Coriobacteriaceae	Collinsella	sp900552385	Group_88
s_9002000001270534_29.permissive	99.19	0.81	0	1978519	46938	kSGB_14631	Species	k__Bacteria|p__Actinobacteria|c__Coriobacteriia|o__Coriobacteriales|f__Coriobacteriaceae|g__Collinsella|s__Collinsella_aerofaciens|t__SGB14631	0.0432444	88	88_65	Bacteria	Actinobacteriota	Coriobacteriia	Coriobacteriales	Coriobacteriaceae	Collinsella	sp900552385	Group_88
s_9002000001277188LL_9.permissive	95.97	0.81	0	2078892	59649	uSGB_14611	Genus	k__Bacteria|p__Actinobacteria|c__Coriobacteriia|o__Coriobacteriales|f__Coriobacteriaceae|g__Collinsella|s__Collinsella_SGB14611|t__SGB14611	0.0465445	88	88_37	Bacteria	Actinobacteriota	Coriobacteriia	Coriobacteriales	Coriobacteriaceae	Collinsella	sp900552385	Group_88
s_9002000001293904_2.permissive	90.32	1.61	0	1875923	13856	kSGB_14631	Species	k__Bacteria|p__Actinobacteria|c__Coriobacteriia|o__Coriobacteriales|f__Coriobacteriaceae|g__Collinsella|s__Collinsella_aerofaciens|t__SGB14631	0.04541	88	88_73	Bacteria	Actinobacteriota	Coriobacteriia	Coriobacteriales	Coriobacteriaceae	Collinsella	sp900552385	Group_88
s_9002000001294380_11.permissive	99.19	0.81	0	2134426	66095	kSGB_14631	Species	k__Bacteria|p__Actinobacteria|c__Coriobacteriia|o__Coriobacteriales|f__Coriobacteriaceae|g__Collinsella|s__Collinsella_aerofaciens|t__SGB14631	0.0455873	88	88_71	Bacteria	Actinobacteriota	Coriobacteriia	Coriobacteriales	Coriobacteriaceae	Collinsella	sp900552385	Group_88
s_9002000001304042_23.permissive	99.19	0.81	0	2043095	68723	kSGB_14631	Species	k__Bacteria|p__Actinobacteria|c__Coriobacteriia|o__Coriobacteriales|f__Coriobacteriaceae|g__Collinsella|s__Collinsella_aerofaciens|t__SGB14631	0.043219	88	88_33	Bacteria	Actinobacteriota	Coriobacteriia	Coriobacteriales	Coriobacteriaceae	Collinsella	sp900552385	Group_88
s_9002000001317659_4.strict	91.77	0.81	0	1803366	53612	kSGB_14631	Species	k__Bacteria|p__Actinobacteria|c__Coriobacteriia|o__Coriobacteriales|f__Coriobacteriaceae|g__Collinsella|s__Collinsella_aerofaciens|t__SGB14631	0.0458276	88	88_35	Bacteria	Actinobacteriota	Coriobacteriia	Coriobacteriales	Coriobacteriaceae	Collinsella	sp900552385	Group_88
s_9002000001321910_5.permissive	98.16	0.81	0	2009702	21107	uSGB_14547	Genus	k__Bacteria|p__Actinobacteria|c__Coriobacteriia|o__Coriobacteriales|f__Coriobacteriaceae|g__Collinsella|s__Collinsella_SGB14547|t__SGB14547	0.0397709	88	88_4	Bacteria	Actinobacteriota	Coriobacteriia	Coriobacteriales	Coriobacteriaceae	Collinsella	sp900552385	Group_88
s_9002000001328080LL_23.permissive	100	1.61	0	2075298	58999	kSGB_14631	Species	k__Bacteria|p__Actinobacteria|c__Coriobacteriia|o__Coriobacteriales|f__Coriobacteriaceae|g__Collinsella|s__Collinsella_aerofaciens|t__SGB14631	0.0432888	88	88_43	Bacteria	Actinobacteriota	Coriobacteriia	Coriobacteriales	Coriobacteriaceae	Collinsella	sp900552385	Group_88
s_9002000001341467_10.strict	90.73	0	0	1922495	19748	uSGB_14567	Genus	k__Bacteria|p__Actinobacteria|c__Coriobacteriia|o__Coriobacteriales|f__Coriobacteriaceae|g__Collinsella|s__Collinsella_SGB14567|t__SGB14567	0.0493897	88	88_82	Bacteria	Actinobacteriota	Coriobacteriia	Coriobacteriales	Coriobacteriaceae	Collinsella	sp900552385	Group_88
s_9002000001346540_9.permissive	99.19	0.81	0	2126611	54818	uSGB_14636	Genus	k__Bacteria|p__Actinobacteria|c__Coriobacteriia|o__Coriobacteriales|f__Coriobacteriaceae|g__Collinsella|s__Collinsella_SGB14636|t__SGB14636	0.0442639	88	88_6	Bacteria	Actinobacteriota	Coriobacteriia	Coriobacteriales	Coriobacteriaceae	Collinsella	sp900552385	Group_88
s_9002000001349142LL_14.permissive	98.39	0.81	0	1977301	68667	kSGB_14631	Species	k__Bacteria|p__Actinobacteria|c__Coriobacteriia|o__Coriobacteriales|f__Coriobacteriaceae|g__Collinsella|s__Collinsella_aerofaciens|t__SGB14631	0.0463966	88	88_14	Bacteria	Actinobacteriota	Coriobacteriia	Coriobacteriales	Coriobacteriaceae	Collinsella	sp900552385	Group_88
s_9002000001360100_9.orig	100	0.81	0	2099283	45716	kSGB_14631	Species	k__Bacteria|p__Actinobacteria|c__Coriobacteriia|o__Coriobacteriales|f__Coriobacteriaceae|g__Collinsella|s__Collinsella_aerofaciens|t__SGB14631	0.0434649	88	88_41	Bacteria	Actinobacteriota	Coriobacteriia	Coriobacteriales	Coriobacteriaceae	Collinsella	sp900552385	Group_88
s_9002000001374735_17.permissive	91.72	1.69	0	1921914	14991	kSGB_14631	Species	k__Bacteria|p__Actinobacteria|c__Coriobacteriia|o__Coriobacteriales|f__Coriobacteriaceae|g__Collinsella|s__Collinsella_aerofaciens|t__SGB14631	0.0446814	88	88_56	Bacteria	Actinobacteriota	Coriobacteriia	Coriobacteriales	Coriobacteriaceae	Collinsella	sp900552385	Group_88
s_9002000001375110_6.permissive	96.77	0.81	0	1951053	47950	kSGB_14631	Species	k__Bacteria|p__Actinobacteria|c__Coriobacteriia|o__Coriobacteriales|f__Coriobacteriaceae|g__Collinsella|s__Collinsella_aerofaciens|t__SGB14631	0.0444455	88	88_38	Bacteria	Actinobacteriota	Coriobacteriia	Coriobacteriales	Coriobacteriaceae	Collinsella	sp900552385	Group_88
s_9002000001377460_17.permissive	95.97	1.61	50	1944346	29134	kSGB_14631	Species	k__Bacteria|p__Actinobacteria|c__Coriobacteriia|o__Coriobacteriales|f__Coriobacteriaceae|g__Collinsella|s__Collinsella_aerofaciens|t__SGB14631	0.0430602	88	88_67	Bacteria	Actinobacteriota	Coriobacteriia	Coriobacteriales	Coriobacteriaceae	Collinsella	sp900552385	Group_88
s_9002000001380545_39.permissive	97.31	1.69	0	2029949	19156	kSGB_14631	Species	k__Bacteria|p__Actinobacteria|c__Coriobacteriia|o__Coriobacteriales|f__Coriobacteriaceae|g__Collinsella|s__Collinsella_aerofaciens|t__SGB14631	0.0444631	88	88_31	Bacteria	Actinobacteriota	Coriobacteriia	Coriobacteriales	Coriobacteriaceae	Collinsella	sp900552385	Group_88
s_9002000001380900_1.permissive	100	0.81	0	2216549	130163	kSGB_14631	Species	k__Bacteria|p__Actinobacteria|c__Coriobacteriia|o__Coriobacteriales|f__Coriobacteriaceae|g__Collinsella|s__Collinsella_aerofaciens|t__SGB14631	0.0448608	88	88_27	Bacteria	Actinobacteriota	Coriobacteriia	Coriobacteriales	Coriobacteriaceae	Collinsella	sp900552385	Group_88
s_9002000001387200_6.strict	100	2.42	0	1973595	57720	kSGB_14631	Species	k__Bacteria|p__Actinobacteria|c__Coriobacteriia|o__Coriobacteriales|f__Coriobacteriaceae|g__Collinsella|s__Collinsella_aerofaciens|t__SGB14631	0.0456846	88	88_61	Bacteria	Actinobacteriota	Coriobacteriia	Coriobacteriales	Coriobacteriaceae	Collinsella	sp900552385	Group_88
s_9002000001392484_34.permissive	100	1.61	50	2060219	46389	uSGB_14634	Genus	k__Bacteria|p__Actinobacteria|c__Coriobacteriia|o__Coriobacteriales|f__Coriobacteriaceae|g__Collinsella|s__Collinsella_SGB14634|t__SGB14634	0.0480005	88	88_12	Bacteria	Actinobacteriota	Coriobacteriia	Coriobacteriales	Coriobacteriaceae	Collinsella	sp900552385	Group_88
s_9002000001393098_20.permissive	99.19	0.81	0	2067343	47419	uSGB_14629	Genus	k__Bacteria|p__Actinobacteria|c__Coriobacteriia|o__Coriobacteriales|f__Coriobacteriaceae|g__Collinsella|s__Collinsella_SGB14629|t__SGB14629	0.0448278	88	88_46	Bacteria	Actinobacteriota	Coriobacteriia	Coriobacteriales	Coriobacteriaceae	Collinsella	sp900552385	Group_88
s_9002000001393561_2.permissive	100	0.81	0	2033195	40567	uSGB_14618	Genus	k__Bacteria|p__Actinobacteria|c__Coriobacteriia|o__Coriobacteriales|f__Coriobacteriaceae|g__Collinsella|s__Collinsella_SGB14618|t__SGB14618	0.0431695	88	88_66	Bacteria	Actinobacteriota	Coriobacteriia	Coriobacteriales	Coriobacteriaceae	Collinsella	sp900552385	Group_88
s_9002000001393703_19.permissive	98.39	0.81	0	1969148	44101	uSGB_14708	Genus	k__Bacteria|p__Actinobacteria|c__Coriobacteriia|o__Coriobacteriales|f__Coriobacteriaceae|g__Collinsella|s__Collinsella_SGB14708|t__SGB14708	0.0411716	88	88_24	Bacteria	Actinobacteriota	Coriobacteriia	Coriobacteriales	Coriobacteriaceae	Collinsella	sp900552385	Group_88
s_9002000001394602_4.permissive	100	0.81	0	2087731	61234	kSGB_14631	Species	k__Bacteria|p__Actinobacteria|c__Coriobacteriia|o__Coriobacteriales|f__Coriobacteriaceae|g__Collinsella|s__Collinsella_aerofaciens|t__SGB14631	0.0433725	88	88_63	Bacteria	Actinobacteriota	Coriobacteriia	Coriobacteriales	Coriobacteriaceae	Collinsella	sp900552385	Group_88
s_9002000001395539_27.strict	99.19	0	0	2085404	60773	kSGB_14631	Species	k__Bacteria|p__Actinobacteria|c__Coriobacteriia|o__Coriobacteriales|f__Coriobacteriaceae|g__Collinsella|s__Collinsella_aerofaciens|t__SGB14631	0.0448891	88	88_72	Bacteria	Actinobacteriota	Coriobacteriia	Coriobacteriales	Coriobacteriaceae	Collinsella	sp900552385	Group_88
s_9002000001397660_6.strict	91.94	0.81	0	1767891	9843	kSGB_14631	Species	k__Bacteria|p__Actinobacteria|c__Coriobacteriia|o__Coriobacteriales|f__Coriobacteriaceae|g__Collinsella|s__Collinsella_aerofaciens|t__SGB14631	0.0457971	88	88_18	Bacteria	Actinobacteriota	Coriobacteriia	Coriobacteriales	Coriobacteriaceae	Collinsella	sp900552385	Group_88
s_9002000001401313_32.permissive	97.43	2.42	66.67	2022550	28352	kSGB_14631	Species	k__Bacteria|p__Actinobacteria|c__Coriobacteriia|o__Coriobacteriales|f__Coriobacteriaceae|g__Collinsella|s__Collinsella_aerofaciens|t__SGB14631	0.0428772	88	88_45	Bacteria	Actinobacteriota	Coriobacteriia	Coriobacteriales	Coriobacteriaceae	Collinsella	sp900552385	Group_88
s_9002000001404066_28.strict	93.15	1.61	50	1996819	22314	uSGB_14594	Genus	k__Bacteria|p__Actinobacteria|c__Coriobacteriia|o__Coriobacteriales|f__Coriobacteriaceae|g__Collinsella|s__Collinsella_SGB14594|t__SGB14594	0.0413321	88	88_7	Bacteria	Actinobacteriota	Coriobacteriia	Coriobacteriales	Coriobacteriaceae	Collinsella	sp900552385	Group_88
s_9002000001406680_7.permissive	95.16	0.81	0	2108106	88874	kSGB_14631	Species	k__Bacteria|p__Actinobacteria|c__Coriobacteriia|o__Coriobacteriales|f__Coriobacteriaceae|g__Collinsella|s__Collinsella_aerofaciens|t__SGB14631	0.0448533	88	88_19	Bacteria	Actinobacteriota	Coriobacteriia	Coriobacteriales	Coriobacteriaceae	Collinsella	sp900552385	Group_88
s_9002000001407430_32.permissive	95.6	0.81	0	1844541	28674	kSGB_14631	Species	k__Bacteria|p__Actinobacteria|c__Coriobacteriia|o__Coriobacteriales|f__Coriobacteriaceae|g__Collinsella|s__Collinsella_aerofaciens|t__SGB14631	0.0434785	88	88_39	Bacteria	Actinobacteriota	Coriobacteriia	Coriobacteriales	Coriobacteriaceae	Collinsella	sp900552385	Group_88
s_9002000001408172_5.strict	90.29	2.53	50	1909443	12127	kSGB_14631	Species	k__Bacteria|p__Actinobacteria|c__Coriobacteriia|o__Coriobacteriales|f__Coriobacteriaceae|g__Collinsella|s__Collinsella_aerofaciens|t__SGB14631	0.0465813	88	88_32	Bacteria	Actinobacteriota	Coriobacteriia	Coriobacteriales	Coriobacteriaceae	Collinsella	sp900552385	Group_88
s_9002000001408575_20.permissive	90.1	2.42	0	1771282	15319	kSGB_14631	Species	k__Bacteria|p__Actinobacteria|c__Coriobacteriia|o__Coriobacteriales|f__Coriobacteriaceae|g__Collinsella|s__Collinsella_aerofaciens|t__SGB14631	0.0460603	88	88_34	Bacteria	Actinobacteriota	Coriobacteriia	Coriobacteriales	Coriobacteriaceae	Collinsella	sp900552385	Group_88
s_9002000001412522_29.permissive	92.74	0.97	0	2101139	72458	kSGB_14631	Species	k__Bacteria|p__Actinobacteria|c__Coriobacteriia|o__Coriobacteriales|f__Coriobacteriaceae|g__Collinsella|s__Collinsella_aerofaciens|t__SGB14631	0.0475921	88	88_2	Bacteria	Actinobacteriota	Coriobacteriia	Coriobacteriales	Coriobacteriaceae	Collinsella	sp900552385	Group_88
s_9002000001420408_35.permissive	99.19	0.81	0	2025947	95104	kSGB_14631	Species	k__Bacteria|p__Actinobacteria|c__Coriobacteriia|o__Coriobacteriales|f__Coriobacteriaceae|g__Collinsella|s__Collinsella_aerofaciens|t__SGB14631	0.0427658	88	88_47	Bacteria	Actinobacteriota	Coriobacteriia	Coriobacteriales	Coriobacteriaceae	Collinsella	sp900552385	Group_88
s_9002000001421399_28.permissive	95.16	0	0	1954910	19159	kSGB_14631	Species	k__Bacteria|p__Actinobacteria|c__Coriobacteriia|o__Coriobacteriales|f__Coriobacteriaceae|g__Collinsella|s__Collinsella_aerofaciens|t__SGB14631	0.0487926	88	88_81	Bacteria	Actinobacteriota	Coriobacteriia	Coriobacteriales	Coriobacteriaceae	Collinsella	sp900552385	Group_88
s_9002000001421826_34.permissive	99.19	0.81	0	2091146	101022	kSGB_14631	Species	k__Bacteria|p__Actinobacteria|c__Coriobacteriia|o__Coriobacteriales|f__Coriobacteriaceae|g__Collinsella|s__Collinsella_aerofaciens|t__SGB14631	0.0437832	88	88_54	Bacteria	Actinobacteriota	Coriobacteriia	Coriobacteriales	Coriobacteriaceae	Collinsella	sp900552385	Group_88
s_9002000001422430_8.permissive	91.37	0	0	1921796	16736	kSGB_14631	Species	k__Bacteria|p__Actinobacteria|c__Coriobacteriia|o__Coriobacteriales|f__Coriobacteriaceae|g__Collinsella|s__Collinsella_aerofaciens|t__SGB14631	0.0465242	88	88_77	Bacteria	Actinobacteriota	Coriobacteriia	Coriobacteriales	Coriobacteriaceae	Collinsella	sp900552385	Group_88
s_9002000001425146_27.permissive	99.19	0.81	0	2167741	107485	kSGB_14631	Species	k__Bacteria|p__Actinobacteria|c__Coriobacteriia|o__Coriobacteriales|f__Coriobacteriaceae|g__Collinsella|s__Collinsella_aerofaciens|t__SGB14631	0.0469602	88	88_75	Bacteria	Actinobacteriota	Coriobacteriia	Coriobacteriales	Coriobacteriaceae	Collinsella	sp900552385	Group_88
s_9002000001428569_24.permissive	94.3	0.81	0	1919298	33760	kSGB_14631	Species	k__Bacteria|p__Actinobacteria|c__Coriobacteriia|o__Coriobacteriales|f__Coriobacteriaceae|g__Collinsella|s__Collinsella_aerofaciens|t__SGB14631	0.0466843	88	88_78	Bacteria	Actinobacteriota	Coriobacteriia	Coriobacteriales	Coriobacteriaceae	Collinsella	sp900552385	Group_88
s_9002000001433400_6.strict	91.53	1.61	0	1971016	12393	kSGB_14631	Species	k__Bacteria|p__Actinobacteria|c__Coriobacteriia|o__Coriobacteriales|f__Coriobacteriaceae|g__Collinsella|s__Collinsella_aerofaciens|t__SGB14631	0.0471978	88	88_13	Bacteria	Actinobacteriota	Coriobacteriia	Coriobacteriales	Coriobacteriaceae	Collinsella	sp900552385	Group_88
s_9002000001438180_16.permissive	92.25	1.34	100	1773178	15453	uSGB_14630	Genus	k__Bacteria|p__Actinobacteria|c__Coriobacteriia|o__Coriobacteriales|f__Coriobacteriaceae|g__Collinsella|s__Collinsella_SGB14630|t__SGB14630	0.0475787	88	88_49	Bacteria	Actinobacteriota	Coriobacteriia	Coriobacteriales	Coriobacteriaceae	Collinsella	sp900552385	Group_88
s_9002000001443799LL_23.permissive	98.39	0.81	0	2037018	29514	kSGB_14631	Species	k__Bacteria|p__Actinobacteria|c__Coriobacteriia|o__Coriobacteriales|f__Coriobacteriaceae|g__Collinsella|s__Collinsella_aerofaciens|t__SGB14631	0.0439725	88	88_69	Bacteria	Actinobacteriota	Coriobacteriia	Coriobacteriales	Coriobacteriaceae	Collinsella	sp900552385	Group_88
s_9002000001445318_21.strict	98.39	0.81	0	2187396	69055	kSGB_14631	Species	k__Bacteria|p__Actinobacteria|c__Coriobacteriia|o__Coriobacteriales|f__Coriobacteriaceae|g__Collinsella|s__Collinsella_aerofaciens|t__SGB14631	0.0450609	88	88_51	Bacteria	Actinobacteriota	Coriobacteriia	Coriobacteriales	Coriobacteriaceae	Collinsella	sp900552385	Group_88
s_9002000001445425_7.permissive	90.32	0.81	0	1942573	42650	uSGB_14620	Genus	k__Bacteria|p__Actinobacteria|c__Coriobacteriia|o__Coriobacteriales|f__Coriobacteriaceae|g__Collinsella|s__Collinsella_SGB14620|t__SGB14620	0.0444666	88	88_70	Bacteria	Actinobacteriota	Coriobacteriia	Coriobacteriales	Coriobacteriaceae	Collinsella	sp900552385	Group_88
s_9002000001445668_24.permissive	97.98	0.81	0	2039341	59547	uSGB_14606	Genus	k__Bacteria|p__Actinobacteria|c__Coriobacteriia|o__Coriobacteriales|f__Coriobacteriaceae|g__Collinsella|s__Collinsella_SGB14606|t__SGB14606	0.0428368	88	88_3	Bacteria	Actinobacteriota	Coriobacteriia	Coriobacteriales	Coriobacteriaceae	Collinsella	sp900552385	Group_88
s_9002000001448688_24.permissive	94.12	0.81	0	1900640	21116	kSGB_14631	Species	k__Bacteria|p__Actinobacteria|c__Coriobacteriia|o__Coriobacteriales|f__Coriobacteriaceae|g__Collinsella|s__Collinsella_aerofaciens|t__SGB14631	0.0446627	88	88_20	Bacteria	Actinobacteriota	Coriobacteriia	Coriobacteriales	Coriobacteriaceae	Collinsella	sp900552385	Group_88
s_9002000001454080_22.strict	95.97	0.81	0	1922500	47913	kSGB_14631	Species	k__Bacteria|p__Actinobacteria|c__Coriobacteriia|o__Coriobacteriales|f__Coriobacteriaceae|g__Collinsella|s__Collinsella_aerofaciens|t__SGB14631	0.0456426	88	88_26	Bacteria	Actinobacteriota	Coriobacteriia	Coriobacteriales	Coriobacteriaceae	Collinsella	sp900552385	Group_88
s_9002000001456330_11.permissive	97.45	0.81	0	1954178	30690	kSGB_14631	Species	k__Bacteria|p__Actinobacteria|c__Coriobacteriia|o__Coriobacteriales|f__Coriobacteriaceae|g__Collinsella|s__Collinsella_aerofaciens|t__SGB14631	0.0456762	88	88_28	Bacteria	Actinobacteriota	Coriobacteriia	Coriobacteriales	Coriobacteriaceae	Collinsella	sp900552385	Group_88
s_9002000001462829_10.permissive	95.97	0.81	0	2001493	26503	kSGB_14631	Species	k__Bacteria|p__Actinobacteria|c__Coriobacteriia|o__Coriobacteriales|f__Coriobacteriaceae|g__Collinsella|s__Collinsella_aerofaciens|t__SGB14631	0.0449157	88	88_48	Bacteria	Actinobacteriota	Coriobacteriia	Coriobacteriales	Coriobacteriaceae	Collinsella	sp900552385	Group_88
s_9002000001463497_9.strict	99.93	0.81	0	1941333	48209	kSGB_14631	Species	k__Bacteria|p__Actinobacteria|c__Coriobacteriia|o__Coriobacteriales|f__Coriobacteriaceae|g__Collinsella|s__Collinsella_aerofaciens|t__SGB14631	0.043279	88	88_23	Bacteria	Actinobacteriota	Coriobacteriia	Coriobacteriales	Coriobacteriaceae	Collinsella	sp900552385	Group_88
s_9002000001466194_23.strict	98.39	0.81	0	2031500	71741	kSGB_14631	Species	k__Bacteria|p__Actinobacteria|c__Coriobacteriia|o__Coriobacteriales|f__Coriobacteriaceae|g__Collinsella|s__Collinsella_aerofaciens|t__SGB14631	0.043928	88	88_22	Bacteria	Actinobacteriota	Coriobacteriia	Coriobacteriales	Coriobacteriaceae	Collinsella	sp900552385	Group_88
s_9002000001466505_3.strict	95.97	1.08	50	1991564	17850	uSGB_14618	Genus	k__Bacteria|p__Actinobacteria|c__Coriobacteriia|o__Coriobacteriales|f__Coriobacteriaceae|g__Collinsella|s__Collinsella_SGB14618|t__SGB14618	0.0442991	88	88_68	Bacteria	Actinobacteriota	Coriobacteriia	Coriobacteriales	Coriobacteriaceae	Collinsella	sp900552385	Group_88
s_9002000001467807_16.permissive	92.63	1.61	0	1870682	31284	uSGB_14677	Genus	k__Bacteria|p__Actinobacteria|c__Coriobacteriia|o__Coriobacteriales|f__Coriobacteriaceae|g__Collinsella|s__Collinsella_SGB14677|t__SGB14677	0.0414546	88	88_11	Bacteria	Actinobacteriota	Coriobacteriia	Coriobacteriales	Coriobacteriaceae	Collinsella	sp900552385	Group_88
s_9002000001477886_4.permissive	92.16	1.61	0	1834530	10727	uSGB_14589	Genus	k__Bacteria|p__Actinobacteria|c__Coriobacteriia|o__Coriobacteriales|f__Coriobacteriaceae|g__Collinsella|s__Collinsella_SGB14589|t__SGB14589	0.0381414	88	88_10	Bacteria	Actinobacteriota	Coriobacteriia	Coriobacteriales	Coriobacteriaceae	Collinsella	sp900552385	Group_88
s_9002000001479951_15.permissive	99.05	0.81	0	2038964	42190	kSGB_14631	Species	k__Bacteria|p__Actinobacteria|c__Coriobacteriia|o__Coriobacteriales|f__Coriobacteriaceae|g__Collinsella|s__Collinsella_aerofaciens|t__SGB14631	0.0436997	88	88_50	Bacteria	Actinobacteriota	Coriobacteriia	Coriobacteriales	Coriobacteriaceae	Collinsella	sp900552385	Group_88
s_9002000001482920_27.orig	93.8	3.63	60	1873539	13230	kSGB_14631	Species	k__Bacteria|p__Actinobacteria|c__Coriobacteriia|o__Coriobacteriales|f__Coriobacteriaceae|g__Collinsella|s__Collinsella_aerofaciens|t__SGB14631	0.0468666	88	88_64	Bacteria	Actinobacteriota	Coriobacteriia	Coriobacteriales	Coriobacteriaceae	Collinsella	sp900552385	Group_88
s_9002000001497216_25.permissive	93.35	1.61	0	2007361	66484	kSGB_14631	Species	k__Bacteria|p__Actinobacteria|c__Coriobacteriia|o__Coriobacteriales|f__Coriobacteriaceae|g__Collinsella|s__Collinsella_aerofaciens|t__SGB14631	0.0458122	88	88_58	Bacteria	Actinobacteriota	Coriobacteriia	Coriobacteriales	Coriobacteriaceae	Collinsella	sp900552385	Group_88
s_9002000001503369_19.orig	99.19	0.81	0	2088248	64361	uSGB_14638	Genus	k__Bacteria|p__Actinobacteria|c__Coriobacteriia|o__Coriobacteriales|f__Coriobacteriaceae|g__Collinsella|s__Collinsella_SGB14638|t__SGB14638	0.04164	88	88_53	Bacteria	Actinobacteriota	Coriobacteriia	Coriobacteriales	Coriobacteriaceae	Collinsella	sp900552385	Group_88
s_9002000001504221_9.permissive	92.47	0.81	0	1917796	26401	kSGB_14631	Species	k__Bacteria|p__Actinobacteria|c__Coriobacteriia|o__Coriobacteriales|f__Coriobacteriaceae|g__Collinsella|s__Collinsella_aerofaciens|t__SGB14631	0.0455334	88	88_16	Bacteria	Actinobacteriota	Coriobacteriia	Coriobacteriales	Coriobacteriaceae	Collinsella	sp900552385	Group_88
s_9002000001530894_1.strict	96.51	0	0	1976967	28256	kSGB_14631	Species	k__Bacteria|p__Actinobacteria|c__Coriobacteriia|o__Coriobacteriales|f__Coriobacteriaceae|g__Collinsella|s__Collinsella_aerofaciens|t__SGB14631	0.046429	88	88_5	Bacteria	Actinobacteriota	Coriobacteriia	Coriobacteriales	Coriobacteriaceae	Collinsella	sp900552385	Group_88
s_9002000001554439_14.strict	100	0.81	0	2081343	68877	kSGB_14631	Species	k__Bacteria|p__Actinobacteria|c__Coriobacteriia|o__Coriobacteriales|f__Coriobacteriaceae|g__Collinsella|s__Collinsella_aerofaciens|t__SGB14631	0.0446485	88	88_17	Bacteria	Actinobacteriota	Coriobacteriia	Coriobacteriales	Coriobacteriaceae	Collinsella	sp900552385	Group_88
s_9002000001558115_6.permissive	98.39	0.81	0	1983882	20778	kSGB_14631	Species	k__Bacteria|p__Actinobacteria|c__Coriobacteriia|o__Coriobacteriales|f__Coriobacteriaceae|g__Collinsella|s__Collinsella_aerofaciens|t__SGB14631	0.044539	88	88_57	Bacteria	Actinobacteriota	Coriobacteriia	Coriobacteriales	Coriobacteriaceae	Collinsella	sp900552385	Group_88
s_9002000001565405_10.permissive	100	0.81	0	2186744	101308	kSGB_14631	Species	k__Bacteria|p__Actinobacteria|c__Coriobacteriia|o__Coriobacteriales|f__Coriobacteriaceae|g__Collinsella|s__Collinsella_aerofaciens|t__SGB14631	0.0469246	88	88_74	Bacteria	Actinobacteriota	Coriobacteriia	Coriobacteriales	Coriobacteriaceae	Collinsella	sp900552385	Group_88
s_9002000001570129_22.permissive	100	0.81	0	2057716	35045	kSGB_14631	Species	k__Bacteria|p__Actinobacteria|c__Coriobacteriia|o__Coriobacteriales|f__Coriobacteriaceae|g__Collinsella|s__Collinsella_aerofaciens|t__SGB14631	0.0463171	88	88_59	Bacteria	Actinobacteriota	Coriobacteriia	Coriobacteriales	Coriobacteriaceae	Collinsella	sp900552385	Group_88
s_9002000001572713_14.permissive	99.62	1.61	0	2028328	36125	uSGB_14635	Genus	k__Bacteria|p__Actinobacteria|c__Coriobacteriia|o__Coriobacteriales|f__Coriobacteriaceae|g__Collinsella|s__Collinsella_SGB14635|t__SGB14635	0.0411998	88	88_15	Bacteria	Actinobacteriota	Coriobacteriia	Coriobacteriales	Coriobacteriaceae	Collinsella	sp900552385	Group_88
s_9002000001580090_35.permissive	92.16	0	0	1817689	20513	kSGB_14631	Species	k__Bacteria|p__Actinobacteria|c__Coriobacteriia|o__Coriobacteriales|f__Coriobacteriaceae|g__Collinsella|s__Collinsella_aerofaciens|t__SGB14631	0.0479447	88	88_79	Bacteria	Actinobacteriota	Coriobacteriia	Coriobacteriales	Coriobacteriaceae	Collinsella	sp900552385	Group_88
s_9002000001233352_27.strict	98.39	1.61	0	2108116	69775	uSGB_14500	Genus	k__Bacteria|p__Actinobacteria|c__Coriobacteriia|o__Coriobacteriales|f__Coriobacteriaceae|g__Collinsella|s__Collinsella_SGB14500|t__SGB14500	0.0514885	89	89_4	Bacteria	Actinobacteriota	Coriobacteriia	Coriobacteriales	Coriobacteriaceae	Collinsella		Group_89
s_9002000001400933_17.permissive	100	0.81	0	2147617	75458	uSGB_14507	Genus	k__Bacteria|p__Actinobacteria|c__Coriobacteriia|o__Coriobacteriales|f__Coriobacteriaceae|g__Collinsella|s__Collinsella_SGB14507|t__SGB14507	0.0452332	89	89_1	Bacteria	Actinobacteriota	Coriobacteriia	Coriobacteriales	Coriobacteriaceae	Collinsella		Group_89
s_9002000001504132_28.strict	99.3	1.61	0	2178121	67607	kSGB_14501	Species	k__Bacteria|p__Actinobacteria|c__Coriobacteriia|o__Coriobacteriales|f__Coriobacteriaceae|g__Collinsella|s__Collinsella_aerofaciens|t__SGB14501	0.0499153	89	89_3	Bacteria	Actinobacteriota	Coriobacteriia	Coriobacteriales	Coriobacteriaceae	Collinsella		Group_89
s_9002000001527647_28.permissive	100	0.81	0	2069250	48155	uSGB_14507	Genus	k__Bacteria|p__Actinobacteria|c__Coriobacteriia|o__Coriobacteriales|f__Coriobacteriaceae|g__Collinsella|s__Collinsella_SGB14507|t__SGB14507	0.0430133	89	89_2	Bacteria	Actinobacteriota	Coriobacteriia	Coriobacteriales	Coriobacteriaceae	Collinsella		Group_89
s_9002000001228076LL_2.permissive	97.42	1.61	0	1996919	17146	uSGB_14542	Genus	k__Bacteria|p__Actinobacteria|c__Coriobacteriia|o__Coriobacteriales|f__Coriobacteriaceae|g__Collinsella|s__Collinsella_SGB14542|t__SGB14542	0.0242964	90	90_0	Bacteria	Actinobacteriota	Coriobacteriia	Coriobacteriales	Coriobacteriaceae	Collinsella	sp902362275	Group_90
s_9002000001425650_16.permissive	94.84	2.42	0	1911549	14175	uSGB_14424	Genus	k__Bacteria|p__Actinobacteria|c__Coriobacteriia|o__Coriobacteriales|f__Coriobacteriaceae|g__Collinsella|s__Collinsella_SGB14424|t__SGB14424	0.0427069	91	91_0	Bacteria	Actinobacteriota	Coriobacteriia	Coriobacteriales	Coriobacteriaceae	Collinsella		Group_91
s_9002000001399800_9.strict	90.98	1.15	0	1619887	13903	uSGB_14370	Family	k__Bacteria|p__Actinobacteria|c__Coriobacteriia|o__Coriobacteriales|f__Atopobiaceae|g__GGB9377|s__GGB9377_SGB14370|t__SGB14370	0.0349884	92	92_0	Bacteria	Actinobacteriota	Coriobacteriia	Coriobacteriales	Atopobiaceae	Paratractidigestivibacter	faecalis	Group_92
s_9002000001244042_10.permissive	93.57	0.88	0	2550416	81307	kSGB_4617	Species	k__Bacteria|p__Firmicutes|c__Clostridia|o__Clostridiales|f__Ruminococcaceae|g__Ruminococcus|s__Ruminococcus_sp_DSM_100440|t__SGB4617	0.0137929	93	93_1	Bacteria	Firmicutes_A	Clostridia	Lachnospirales	Lachnospiraceae	Sellimonas	intestinalis	Group_93
s_9002000001504132_24.strict	94.74	0.88	0	2532181	57729	kSGB_4617	Species	k__Bacteria|p__Firmicutes|c__Clostridia|o__Clostridiales|f__Ruminococcaceae|g__Ruminococcus|s__Ruminococcus_sp_DSM_100440|t__SGB4617	0.0131268	93	93_1	Bacteria	Firmicutes_A	Clostridia	Lachnospirales	Lachnospiraceae	Sellimonas	intestinalis	Group_93
s_9002000001244042_37.orig	95.17	0.58	0	3461688	49433	uSGB_4630	Genus	k__Bacteria|p__Firmicutes|c__Clostridia|o__Clostridiales|f__Lachnospiraceae|g__Lachnoclostridium|s__Lachnoclostridium_SGB4630|t__SGB4630	0.0140704	94	94_0	Bacteria	Firmicutes_A	Clostridia	Lachnospirales	Lachnospiraceae	Clostridium_AP	sp000509125	Group_94
s_9002000001233352_6.strict	90.6	0.67	0	2015445	118662	uSGB_14980	Family	k__Bacteria|p__Firmicutes|c__Clostridia|o__Clostridiales|f__Clostridiaceae|g__GGB9568|s__GGB9568_SGB14980|t__SGB14980	0.025632	95	95_1	Bacteria	Firmicutes_A	Clostridia	Oscillospirales	Butyricicoccaceae	Butyricicoccus_A	sp002395695	Group_95
s_9002000001265472_36.strict	99.33	1.34	0	2197380	78988	uSGB_14980	Family	k__Bacteria|p__Firmicutes|c__Clostridia|o__Clostridiales|f__Clostridiaceae|g__GGB9568|s__GGB9568_SGB14980|t__SGB14980	0.0242488	95	95_2	Bacteria	Firmicutes_A	Clostridia	Oscillospirales	Butyricicoccaceae	Butyricicoccus_A	sp002395695	Group_95
s_9002000001244042_9.strict	93.04	0	0	2700920	69216	kSGB_7262	Species	k__Bacteria|p__Firmicutes|c__Clostridia|o__Clostridiales|f__Lachnospiraceae|g__Blautia|s__Blautia_sp_An249|t__SGB7262	0.0224349	96	96_0	Bacteria	Firmicutes_A	Clostridia	Lachnospirales	Lachnospiraceae	Blautia_A	avistercoris	Group_96
s_9002000001304042_21.strict	97.56	0.67	0	2169266	37380	uSGB_14993	Family	k__Bacteria|p__Firmicutes|c__Clostridia|o__Clostridiales|f__Clostridiaceae|g__GGB9578|s__GGB9578_SGB14993|t__SGB14993	0.0313829	97	97_1	Bacteria	Firmicutes_A	Clostridia	Oscillospirales	Butyricicoccaceae	Agathobaculum	butyriciproducens	Group_97
s_9002000001425146_25.permissive	90.04	1.01	0	2038843	14307	uSGB_14993	Family	k__Bacteria|p__Firmicutes|c__Clostridia|o__Clostridiales|f__Clostridiaceae|g__GGB9578|s__GGB9578_SGB14993|t__SGB14993	0.0314547	97	97_2	Bacteria	Firmicutes_A	Clostridia	Oscillospirales	Butyricicoccaceae	Agathobaculum	butyriciproducens	Group_97
s_9002000001412150_19.strict	94.41	2.01	66.67	2428119	35948	uSGB_14857	Other	k__Bacteria|p__Firmicutes|c__CFGB3002|o__OFGB3002|f__FGB3002|g__GGB9464|s__GGB9464_SGB14857|t__SGB14857	0.0069272	98	98_0	Bacteria	Firmicutes_A	Clostridia	Oscillospirales	Acutalibacteraceae	Scatavimonas	sp900540275	Group_98
s_9002000001247124_38.strict	91.88	1.27	33.33	2865938	25520	kSGB_5090	Species	k__Bacteria|p__Firmicutes|c__Clostridia|o__Clostridiales|f__Clostridiales_unclassified|g__Clostridiales_unclassified|s__Clostridiales_bacterium_KLE1615|t__SGB5090	0.0280343	99	99_1	Bacteria	Firmicutes_A	Clostridia	Lachnospirales	Lachnospiraceae	KLE1615	sp900066985	Group_99
s_9002000001380545_31.strict	91.35	0.32	0	2792396	16831	kSGB_5090	Species	k__Bacteria|p__Firmicutes|c__Clostridia|o__Clostridiales|f__Clostridiales_unclassified|g__Clostridiales_unclassified|s__Clostridiales_bacterium_KLE1615|t__SGB5090	0.0281731	99	99_2	Bacteria	Firmicutes_A	Clostridia	Lachnospirales	Lachnospiraceae	KLE1615	sp900066985	Group_99
s_9002000001241407_17.orig	94.63	0.22	100	2385296	31425	uSGB_4652	Other	k__Bacteria|p__Firmicutes|c__CFGB1421|o__OFGB1421|f__FGB1421|g__GGB3482|s__GGB3482_SGB4652|t__SGB4652	0.0149619	100	100_0	Bacteria	Firmicutes_A	Clostridia	Lachnospirales	Lachnospiraceae	Butyribacter	sp003529475	Group_100
s_9002000001479951_5.permissive	93.24	0	0	2399574	74362	uSGB_4952	Family	k__Bacteria|p__Firmicutes|c__Clostridia|o__Clostridiales|f__Lachnospiraceae|g__GGB3645|s__GGB3645_SGB4952|t__SGB4952	0.236445	101	101_0	Bacteria	Firmicutes_A	Clostridia	Lachnospirales	Lachnospiraceae	UBA933		Group_101
s_9002000001200638_46.permissive	90.86	0	0	2301461	8213	kSGB_5082	Species	k__Bacteria|p__Firmicutes|c__Clostridia|o__Clostridiales|f__Eubacteriaceae|g__Eubacterium|s__Eubacterium_eligens|t__SGB5082	0.0250027	102	102_1	Bacteria	Firmicutes_A	Clostridia	Lachnospirales	Lachnospiraceae	Lachnospira	eligens_A	Group_102
s_9002000001366180_44.permissive	97.99	0	0	2333403	17394	uSGB_5083	Genus	k__Bacteria|p__Firmicutes|c__Clostridia|o__Clostridiales|f__Eubacteriaceae|g__Eubacterium|s__Eubacterium_SGB5083|t__SGB5083	0.0189569	102	102_3	Bacteria	Firmicutes_A	Clostridia	Lachnospirales	Lachnospiraceae	Lachnospira	eligens_A	Group_102
s_9002000001392958_2.permissive	94.97	0	0	2334578	12787	kSGB_5082	Species	k__Bacteria|p__Firmicutes|c__Clostridia|o__Clostridiales|f__Eubacteriaceae|g__Eubacterium|s__Eubacterium_eligens|t__SGB5082	0.0240335	102	102_2	Bacteria	Firmicutes_A	Clostridia	Lachnospirales	Lachnospiraceae	Lachnospira	eligens_A	Group_102
s_9002000001343701_27.strict	99.33	0	0	2607158	157005	kSGB_5068	Species	k__Bacteria|p__Firmicutes|c__Clostridia|o__Clostridiales|f__Clostridiales_unclassified|g__Clostridiales_unclassified|s__Bacteroides_pectinophilus|t__SGB5068	0.0120491	103	103_1	Bacteria	Firmicutes_A	Clostridia	Lachnospirales	Lachnospiraceae	Bacteroides_F	pectinophilus	Group_103
s_9002000001514308_37.permissive	92.55	1.12	66.67	2379186	13847	kSGB_5068	Species	k__Bacteria|p__Firmicutes|c__Clostridia|o__Clostridiales|f__Clostridiales_unclassified|g__Clostridiales_unclassified|s__Bacteroides_pectinophilus|t__SGB5068	0.0118298	103	103_1	Bacteria	Firmicutes_A	Clostridia	Lachnospirales	Lachnospiraceae	Bacteroides_F	pectinophilus	Group_103
s_9002000001338668_5.permissive	90.17	0.56	0	2091121	25080	uSGB_4644	Other	k__Bacteria|p__Firmicutes|c__CFGB1420|o__OFGB1420|f__FGB1420|g__GGB3479|s__GGB3479_SGB4644|t__SGB4644	0.0271374	104	104_0	Bacteria	Firmicutes_A	Clostridia	Lachnospirales	Lachnospiraceae	Eubacterium_F	sp003491505	Group_104
s_9002000001270534_6.permissive	96.36	0.15	0	1865142	13114	kSGB_5065	Species	k__Bacteria|p__Firmicutes|c__Clostridia|o__Clostridiales|f__Lachnospiraceae|g__Butyrivibrio|s__Butyrivibrio_crossotus|t__SGB5065	0.016914	105	105_1	Bacteria	Firmicutes_A	Clostridia	Lachnospirales	Lachnospiraceae	Butyrivibrio_A	crossotus	Group_105
s_9002000001392457_29.strict	96.64	0	0	2112541	148713	kSGB_5065	Species	k__Bacteria|p__Firmicutes|c__Clostridia|o__Clostridiales|f__Lachnospiraceae|g__Butyrivibrio|s__Butyrivibrio_crossotus|t__SGB5065	0.0178641	105	105_1	Bacteria	Firmicutes_A	Clostridia	Lachnospirales	Lachnospiraceae	Butyrivibrio_A	crossotus	Group_105
s_9002000001392958_1.orig	93.03	0.02	100	1817563	20459	kSGB_5065	Species	k__Bacteria|p__Firmicutes|c__Clostridia|o__Clostridiales|f__Lachnospiraceae|g__Butyrivibrio|s__Butyrivibrio_crossotus|t__SGB5065	0.0173655	105	105_1	Bacteria	Firmicutes_A	Clostridia	Lachnospirales	Lachnospiraceae	Butyrivibrio_A	crossotus	Group_105
s_9002000001447950_21.orig	91.72	0.11	0	1801027	21805	kSGB_5065	Species	k__Bacteria|p__Firmicutes|c__Clostridia|o__Clostridiales|f__Lachnospiraceae|g__Butyrivibrio|s__Butyrivibrio_crossotus|t__SGB5065	0.0180133	105	105_2	Bacteria	Firmicutes_A	Clostridia	Lachnospirales	Lachnospiraceae	Butyrivibrio_A	crossotus	Group_105
s_9002000001574290_11.permissive	90.72	0	0	1710170	18095	kSGB_5065	Species	k__Bacteria|p__Firmicutes|c__Clostridia|o__Clostridiales|f__Lachnospiraceae|g__Butyrivibrio|s__Butyrivibrio_crossotus|t__SGB5065	0.0183546	105	105_1	Bacteria	Firmicutes_A	Clostridia	Lachnospirales	Lachnospiraceae	Butyrivibrio_A	crossotus	Group_105
s_9002000001589560_14.permissive	97.32	0	0	1958416	51244	kSGB_5065	Species	k__Bacteria|p__Firmicutes|c__Clostridia|o__Clostridiales|f__Lachnospiraceae|g__Butyrivibrio|s__Butyrivibrio_crossotus|t__SGB5065	0.0170655	105	105_1	Bacteria	Firmicutes_A	Clostridia	Lachnospirales	Lachnospiraceae	Butyrivibrio_A	crossotus	Group_105
s_9002000001184329_30.orig	96.12	0.76	0	2563302	25283	uSGB_4798	Family	k__Bacteria|p__Firmicutes|c__Clostridia|o__Clostridiales|f__Lachnospiraceae|g__GGB3582|s__GGB3582_SGB4798|t__SGB4798	0.0120182	106	106_0	Bacteria	Firmicutes_A	Clostridia	Lachnospirales	Lachnospiraceae	Blautia	sp900541955	Group_106
s_9002000001504132_26.permissive	95.73	1.27	50	3381960	17431	uSGB_4799	Family	k__Bacteria|p__Firmicutes|c__Clostridia|o__Clostridiales|f__Lachnospiraceae|g__GGB3583|s__GGB3583_SGB4799|t__SGB4799	0.0237264	107	107_0	Bacteria	Firmicutes_A	Clostridia	Lachnospirales	Lachnospiraceae	Blautia	pullicola	Group_107
s_9002000001334014_9.orig	92.45	2.2	16.67	2889364	10956	uSGB_4882	Other	k__Bacteria|p__Firmicutes|c__CFGB1451|o__OFGB1451|f__FGB1451|g__GGB3612|s__GGB3612_SGB4882|t__SGB4882	0.0185052	108	108_0	Bacteria	Firmicutes_A	Clostridia	Lachnospirales	Lachnospiraceae	COE1	sp001916965	Group_108
s_9002000001552710_17.permissive	90.33	1.27	0	2403552	25246	uSGB_4868	Family	k__Bacteria|p__Firmicutes|c__Clostridia|o__Clostridiales|f__Lachnospiraceae|g__GGB3604|s__GGB3604_SGB4868|t__SGB4868	0.0224379	109	109_0	Bacteria	Firmicutes_A	Clostridia	Lachnospirales	Lachnospiraceae	Oliverpabstia	intestinalis	Group_109
s_9002000001351641_6.permissive	97.14	1.22	25	2818287	29761	uSGB_4938	Family	k__Bacteria|p__Firmicutes|c__Clostridia|o__Clostridiales|f__Lachnospiraceae|g__GGB3641|s__GGB3641_SGB4938|t__SGB4938	0.0209226	110	110_1	Bacteria	Firmicutes_A	Clostridia	Lachnospirales	Lachnospiraceae	RUG115	sp900066395	Group_110
s_9002000001444393_16.permissive	93.17	0.74	0	2305500	40057	uSGB_4938	Family	k__Bacteria|p__Firmicutes|c__Clostridia|o__Clostridiales|f__Lachnospiraceae|g__GGB3641|s__GGB3641_SGB4938|t__SGB4938	0.0192711	110	110_2	Bacteria	Firmicutes_A	Clostridia	Lachnospirales	Lachnospiraceae	RUG115	sp900066395	Group_110
s_9002000001454910_18.strict	92.04	1.69	0	2613754	79125	kSGB_4925	Species	k__Bacteria|p__Firmicutes|c__Clostridia|o__Clostridiales|f__Lachnospiraceae|g__Roseburia|s__Roseburia_faecis|t__SGB4925	0.021986	111	111_9	Bacteria	Firmicutes_A	Clostridia	Lachnospirales	Lachnospiraceae	Agathobacter	faecis	Group_111
s_9002000001359499_12.strict	95.41	1.76	0	3047448	102358	kSGB_4925	Species	k__Bacteria|p__Firmicutes|c__Clostridia|o__Clostridiales|f__Lachnospiraceae|g__Roseburia|s__Roseburia_faecis|t__SGB4925	0.0230954	111	111_8	Bacteria	Firmicutes_A	Clostridia	Lachnospirales	Lachnospiraceae	Agathobacter	faecis	Group_111
s_9002000001523405_18.permissive	97.67	2.24	0	2883390	74329	kSGB_4925	Species	k__Bacteria|p__Firmicutes|c__Clostridia|o__Clostridiales|f__Lachnospiraceae|g__Roseburia|s__Roseburia_faecis|t__SGB4925	0.021673	111	111_7	Bacteria	Firmicutes_A	Clostridia	Lachnospirales	Lachnospiraceae	Agathobacter	faecis	Group_111
s_9002000001295598_21.permissive	95.71	2.24	0	2890263	95488	kSGB_4925	Species	k__Bacteria|p__Firmicutes|c__Clostridia|o__Clostridiales|f__Lachnospiraceae|g__Roseburia|s__Roseburia_faecis|t__SGB4925	0.0213143	111	111_6	Bacteria	Firmicutes_A	Clostridia	Lachnospirales	Lachnospiraceae	Agathobacter	faecis	Group_111
s_9002000001394021_36.permissive	99.21	1.76	0	2882627	69837	kSGB_4925	Species	k__Bacteria|p__Firmicutes|c__Clostridia|o__Clostridiales|f__Lachnospiraceae|g__Roseburia|s__Roseburia_faecis|t__SGB4925	0.0216785	111	111_5	Bacteria	Firmicutes_A	Clostridia	Lachnospirales	Lachnospiraceae	Agathobacter	faecis	Group_111
s_9002000001338416_6.permissive	96.38	1.76	0	2717551	89623	kSGB_4925	Species	k__Bacteria|p__Firmicutes|c__Clostridia|o__Clostridiales|f__Lachnospiraceae|g__Roseburia|s__Roseburia_faecis|t__SGB4925	0.0214878	111	111_4	Bacteria	Firmicutes_A	Clostridia	Lachnospirales	Lachnospiraceae	Agathobacter	faecis	Group_111
s_9002000001341879_6.permissive	99.21	4.09	7.14	3905006	104268	kSGB_4925	Species	k__Bacteria|p__Firmicutes|c__Clostridia|o__Clostridiales|f__Lachnospiraceae|g__Roseburia|s__Roseburia_faecis|t__SGB4925	0.0283598	111	111_32	Bacteria	Firmicutes_A	Clostridia	Lachnospirales	Lachnospiraceae	Agathobacter	faecis	Group_111
s_9002000001361675_20.strict	97.26	1.45	0	3078427	94075	kSGB_4925	Species	k__Bacteria|p__Firmicutes|c__Clostridia|o__Clostridiales|f__Lachnospiraceae|g__Roseburia|s__Roseburia_faecis|t__SGB4925	0.023327	111	111_31	Bacteria	Firmicutes_A	Clostridia	Lachnospirales	Lachnospiraceae	Agathobacter	faecis	Group_111
s_9002000001514308_33.permissive	94.42	2.24	0	2778486	62290	kSGB_4925	Species	k__Bacteria|p__Firmicutes|c__Clostridia|o__Clostridiales|f__Lachnospiraceae|g__Roseburia|s__Roseburia_faecis|t__SGB4925	0.0224896	111	111_30	Bacteria	Firmicutes_A	Clostridia	Lachnospirales	Lachnospiraceae	Agathobacter	faecis	Group_111
s_9002000001212011_30.strict	92.31	1.76	16.67	2767169	67300	kSGB_4925	Species	k__Bacteria|p__Firmicutes|c__Clostridia|o__Clostridiales|f__Lachnospiraceae|g__Roseburia|s__Roseburia_faecis|t__SGB4925	0.02335	111	111_3	Bacteria	Firmicutes_A	Clostridia	Lachnospirales	Lachnospiraceae	Agathobacter	faecis	Group_111
s_9002000001231803_14.strict	95.65	3.45	0	2970664	115036	kSGB_4925	Species	k__Bacteria|p__Firmicutes|c__Clostridia|o__Clostridiales|f__Lachnospiraceae|g__Roseburia|s__Roseburia_faecis|t__SGB4925	0.0243378	111	111_3	Bacteria	Firmicutes_A	Clostridia	Lachnospirales	Lachnospiraceae	Agathobacter	faecis	Group_111
s_9002000001463497_29.strict	94.26	1.93	0	2770357	72261	kSGB_4925	Species	k__Bacteria|p__Firmicutes|c__Clostridia|o__Clostridiales|f__Lachnospiraceae|g__Roseburia|s__Roseburia_faecis|t__SGB4925	0.0221489	111	111_29	Bacteria	Firmicutes_A	Clostridia	Lachnospirales	Lachnospiraceae	Agathobacter	faecis	Group_111
s_9002000001446520_1.permissive	99.21	2.48	0	3083929	120943	kSGB_4925	Species	k__Bacteria|p__Firmicutes|c__Clostridia|o__Clostridiales|f__Lachnospiraceae|g__Roseburia|s__Roseburia_faecis|t__SGB4925	0.0226559	111	111_28	Bacteria	Firmicutes_A	Clostridia	Lachnospirales	Lachnospiraceae	Agathobacter	faecis	Group_111
s_9002000001588517_2.orig	99.21	1.76	0	2897746	85032	kSGB_4925	Species	k__Bacteria|p__Firmicutes|c__Clostridia|o__Clostridiales|f__Lachnospiraceae|g__Roseburia|s__Roseburia_faecis|t__SGB4925	0.0210466	111	111_27	Bacteria	Firmicutes_A	Clostridia	Lachnospirales	Lachnospiraceae	Agathobacter	faecis	Group_111
s_9002000001551301_10.permissive	91.43	2	0	2898286	54546	kSGB_4925	Species	k__Bacteria|p__Firmicutes|c__Clostridia|o__Clostridiales|f__Lachnospiraceae|g__Roseburia|s__Roseburia_faecis|t__SGB4925	0.0248188	111	111_26	Bacteria	Firmicutes_A	Clostridia	Lachnospirales	Lachnospiraceae	Agathobacter	faecis	Group_111
s_9002000001395539_19.orig	93.58	1.71	16.67	2747109	87099	kSGB_4925	Species	k__Bacteria|p__Firmicutes|c__Clostridia|o__Clostridiales|f__Lachnospiraceae|g__Roseburia|s__Roseburia_faecis|t__SGB4925	0.0219734	111	111_25	Bacteria	Firmicutes_A	Clostridia	Lachnospirales	Lachnospiraceae	Agathobacter	faecis	Group_111
s_9002000001321910_11.permissive	93.59	1.69	0	2456293	35352	kSGB_4925	Species	k__Bacteria|p__Firmicutes|c__Clostridia|o__Clostridiales|f__Lachnospiraceae|g__Roseburia|s__Roseburia_faecis|t__SGB4925	0.0216458	111	111_24	Bacteria	Firmicutes_A	Clostridia	Lachnospirales	Lachnospiraceae	Agathobacter	faecis	Group_111
s_9002000001425146_2.orig	94.09	1.52	0	2468912	40152	kSGB_4925	Species	k__Bacteria|p__Firmicutes|c__Clostridia|o__Clostridiales|f__Lachnospiraceae|g__Roseburia|s__Roseburia_faecis|t__SGB4925	0.0219765	111	111_23	Bacteria	Firmicutes_A	Clostridia	Lachnospirales	Lachnospiraceae	Agathobacter	faecis	Group_111
s_9002000001398120_9.permissive	99.21	3.57	0	2959777	69430	kSGB_4925	Species	k__Bacteria|p__Firmicutes|c__Clostridia|o__Clostridiales|f__Lachnospiraceae|g__Roseburia|s__Roseburia_faecis|t__SGB4925	0.0225902	111	111_22	Bacteria	Firmicutes_A	Clostridia	Lachnospirales	Lachnospiraceae	Agathobacter	faecis	Group_111
s_9002000001200638_27.strict	94.49	2.56	0	2675795	86145	kSGB_4925	Species	k__Bacteria|p__Firmicutes|c__Clostridia|o__Clostridiales|f__Lachnospiraceae|g__Roseburia|s__Roseburia_faecis|t__SGB4925	0.0215638	111	111_21	Bacteria	Firmicutes_A	Clostridia	Lachnospirales	Lachnospiraceae	Agathobacter	faecis	Group_111
s_9002000001408575_28.permissive	93.32	1.45	0	2232927	43573	kSGB_4925	Species	k__Bacteria|p__Firmicutes|c__Clostridia|o__Clostridiales|f__Lachnospiraceae|g__Roseburia|s__Roseburia_faecis|t__SGB4925	0.0220119	111	111_20	Bacteria	Firmicutes_A	Clostridia	Lachnospirales	Lachnospiraceae	Agathobacter	faecis	Group_111
s_9002000001225234_30.strict	98.57	1.45	0	2937419	144518	kSGB_4925	Species	k__Bacteria|p__Firmicutes|c__Clostridia|o__Clostridiales|f__Lachnospiraceae|g__Roseburia|s__Roseburia_faecis|t__SGB4925	0.0216498	111	111_2	Bacteria	Firmicutes_A	Clostridia	Lachnospirales	Lachnospiraceae	Agathobacter	faecis	Group_111
s_9002000001523343_18.strict	98.97	1.45	0	2875882	149715	kSGB_4925	Species	k__Bacteria|p__Firmicutes|c__Clostridia|o__Clostridiales|f__Lachnospiraceae|g__Roseburia|s__Roseburia_faecis|t__SGB4925	0.0214967	111	111_2	Bacteria	Firmicutes_A	Clostridia	Lachnospirales	Lachnospiraceae	Agathobacter	faecis	Group_111
s_9002000001319297_22.permissive	95.07	3.69	0	2785613	54237	kSGB_4925	Species	k__Bacteria|p__Firmicutes|c__Clostridia|o__Clostridiales|f__Lachnospiraceae|g__Roseburia|s__Roseburia_faecis|t__SGB4925	0.0238544	111	111_19	Bacteria	Firmicutes_A	Clostridia	Lachnospirales	Lachnospiraceae	Agathobacter	faecis	Group_111
s_9002000001338659_1.strict	94.58	1.61	0	2623330	61765	kSGB_4925	Species	k__Bacteria|p__Firmicutes|c__Clostridia|o__Clostridiales|f__Lachnospiraceae|g__Roseburia|s__Roseburia_faecis|t__SGB4925	0.0212266	111	111_18	Bacteria	Firmicutes_A	Clostridia	Lachnospirales	Lachnospiraceae	Agathobacter	faecis	Group_111
s_9002000001304937LL_17.permissive	96.14	2.33	0	2745347	75377	kSGB_4925	Species	k__Bacteria|p__Firmicutes|c__Clostridia|o__Clostridiales|f__Lachnospiraceae|g__Roseburia|s__Roseburia_faecis|t__SGB4925	0.0212058	111	111_17	Bacteria	Firmicutes_A	Clostridia	Lachnospirales	Lachnospiraceae	Agathobacter	faecis	Group_111
s_9002000001388561_8.strict	95.19	1.69	0	2903579	195894	kSGB_4925	Species	k__Bacteria|p__Firmicutes|c__Clostridia|o__Clostridiales|f__Lachnospiraceae|g__Roseburia|s__Roseburia_faecis|t__SGB4925	0.0223642	111	111_16	Bacteria	Firmicutes_A	Clostridia	Lachnospirales	Lachnospiraceae	Agathobacter	faecis	Group_111
s_9002000001572920_16.permissive	96.08	1.28	0	2871850	81966	kSGB_4925	Species	k__Bacteria|p__Firmicutes|c__Clostridia|o__Clostridiales|f__Lachnospiraceae|g__Roseburia|s__Roseburia_faecis|t__SGB4925	0.0223726	111	111_15	Bacteria	Firmicutes_A	Clostridia	Lachnospirales	Lachnospiraceae	Agathobacter	faecis	Group_111
s_9002000001572713_36.strict	90.82	2.9	0	2383697	82875	kSGB_4925	Species	k__Bacteria|p__Firmicutes|c__Clostridia|o__Clostridiales|f__Lachnospiraceae|g__Roseburia|s__Roseburia_faecis|t__SGB4925	0.0232281	111	111_14	Bacteria	Firmicutes_A	Clostridia	Lachnospirales	Lachnospiraceae	Agathobacter	faecis	Group_111
s_9002000001229707_1.strict	97.43	2.17	0	2669338	32851	kSGB_4925	Species	k__Bacteria|p__Firmicutes|c__Clostridia|o__Clostridiales|f__Lachnospiraceae|g__Roseburia|s__Roseburia_faecis|t__SGB4925	0.0223043	111	111_13	Bacteria	Firmicutes_A	Clostridia	Lachnospirales	Lachnospiraceae	Agathobacter	faecis	Group_111
s_9002000001558115_9.strict	91.18	2.24	0	2337747	32982	kSGB_4925	Species	k__Bacteria|p__Firmicutes|c__Clostridia|o__Clostridiales|f__Lachnospiraceae|g__Roseburia|s__Roseburia_faecis|t__SGB4925	0.0234287	111	111_12	Bacteria	Firmicutes_A	Clostridia	Lachnospirales	Lachnospiraceae	Agathobacter	faecis	Group_111
s_9002000001288940_40.permissive	95.71	1.69	0	2788339	69147	kSGB_4925	Species	k__Bacteria|p__Firmicutes|c__Clostridia|o__Clostridiales|f__Lachnospiraceae|g__Roseburia|s__Roseburia_faecis|t__SGB4925	0.0219856	111	111_11	Bacteria	Firmicutes_A	Clostridia	Lachnospirales	Lachnospiraceae	Agathobacter	faecis	Group_111
s_9002000001515593_26.orig	97.72	1.76	0	2802222	70231	kSGB_4925	Species	k__Bacteria|p__Firmicutes|c__Clostridia|o__Clostridiales|f__Lachnospiraceae|g__Roseburia|s__Roseburia_faecis|t__SGB4925	0.0208433	111	111_10	Bacteria	Firmicutes_A	Clostridia	Lachnospirales	Lachnospiraceae	Agathobacter	faecis	Group_111
s_9002000001422430_4.permissive	95.01	2.73	14.29	2903583	43476	kSGB_4925	Species	k__Bacteria|p__Firmicutes|c__Clostridia|o__Clostridiales|f__Lachnospiraceae|g__Roseburia|s__Roseburia_faecis|t__SGB4925	0.0229267	111	111_1	Bacteria	Firmicutes_A	Clostridia	Lachnospirales	Lachnospiraceae	Agathobacter	faecis	Group_111
s_9002000001445318_42.permissive	98.1	2.4	0	2988879	133869	kSGB_4925	Species	k__Bacteria|p__Firmicutes|c__Clostridia|o__Clostridiales|f__Lachnospiraceae|g__Roseburia|s__Roseburia_faecis|t__SGB4925	0.0224975	111	111_1	Bacteria	Firmicutes_A	Clostridia	Lachnospirales	Lachnospiraceae	Agathobacter	faecis	Group_111
s_9002000001439850_16.strict	99.52	0	0	2636351	98544	kSGB_4933	Species	k__Bacteria|p__Firmicutes|c__Clostridia|o__Clostridiales|f__Lachnospiraceae|g__Lachnospiraceae_unclassified|s__Eubacterium_rectale|t__SGB4933	0.0259702	112	112_99	Bacteria	Firmicutes_A	Clostridia	Lachnospirales	Lachnospiraceae	Agathobacter	rectalis	Group_112
s_9002000001187760_8.permissive	93.24	0	0	2240153	56975	kSGB_4933	Species	k__Bacteria|p__Firmicutes|c__Clostridia|o__Clostridiales|f__Lachnospiraceae|g__Lachnospiraceae_unclassified|s__Eubacterium_rectale|t__SGB4933	0.0277455	112	112_98	Bacteria	Firmicutes_A	Clostridia	Lachnospirales	Lachnospiraceae	Agathobacter	rectalis	Group_112
s_9002000001365670_7.permissive	95.65	0	0	2348999	44643	kSGB_4933	Species	k__Bacteria|p__Firmicutes|c__Clostridia|o__Clostridiales|f__Lachnospiraceae|g__Lachnospiraceae_unclassified|s__Eubacterium_rectale|t__SGB4933	0.0256474	112	112_97	Bacteria	Firmicutes_A	Clostridia	Lachnospirales	Lachnospiraceae	Agathobacter	rectalis	Group_112
s_9002000001214606_37.orig	92.27	0.48	50	2163912	16969	kSGB_4933	Species	k__Bacteria|p__Firmicutes|c__Clostridia|o__Clostridiales|f__Lachnospiraceae|g__Lachnospiraceae_unclassified|s__Eubacterium_rectale|t__SGB4933	0.0264033	112	112_96	Bacteria	Firmicutes_A	Clostridia	Lachnospirales	Lachnospiraceae	Agathobacter	rectalis	Group_112
s_9002000001401313_26.strict	91.3	0	0	2542895	57657	kSGB_4933	Species	k__Bacteria|p__Firmicutes|c__Clostridia|o__Clostridiales|f__Lachnospiraceae|g__Lachnospiraceae_unclassified|s__Eubacterium_rectale|t__SGB4933	0.0281788	112	112_95	Bacteria	Firmicutes_A	Clostridia	Lachnospirales	Lachnospiraceae	Agathobacter	rectalis	Group_112
s_9002000001377460_25.strict	97.83	0	0	2416886	53403	kSGB_4933	Species	k__Bacteria|p__Firmicutes|c__Clostridia|o__Clostridiales|f__Lachnospiraceae|g__Lachnospiraceae_unclassified|s__Eubacterium_rectale|t__SGB4933	0.0260148	112	112_94	Bacteria	Firmicutes_A	Clostridia	Lachnospirales	Lachnospiraceae	Agathobacter	rectalis	Group_112
s_9002000001327673_5.permissive	90.9	0.97	100	2173219	36727	kSGB_4933	Species	k__Bacteria|p__Firmicutes|c__Clostridia|o__Clostridiales|f__Lachnospiraceae|g__Lachnospiraceae_unclassified|s__Eubacterium_rectale|t__SGB4933	0.0268741	112	112_93	Bacteria	Firmicutes_A	Clostridia	Lachnospirales	Lachnospiraceae	Agathobacter	rectalis	Group_112
s_9002000001208627_7.permissive	93.94	2.27	50	2072011	12127	kSGB_4933	Species	k__Bacteria|p__Firmicutes|c__Clostridia|o__Clostridiales|f__Lachnospiraceae|g__Lachnospiraceae_unclassified|s__Eubacterium_rectale|t__SGB4933	0.0267932	112	112_92	Bacteria	Firmicutes_A	Clostridia	Lachnospirales	Lachnospiraceae	Agathobacter	rectalis	Group_112
s_9002000001215917_19.strict	97.83	0	0	2513453	35951	kSGB_4933	Species	k__Bacteria|p__Firmicutes|c__Clostridia|o__Clostridiales|f__Lachnospiraceae|g__Lachnospiraceae_unclassified|s__Eubacterium_rectale|t__SGB4933	0.0256768	112	112_92	Bacteria	Firmicutes_A	Clostridia	Lachnospirales	Lachnospiraceae	Agathobacter	rectalis	Group_112
s_9002000001475729LL_18.permissive	96.82	0	0	2501192	29489	kSGB_4933	Species	k__Bacteria|p__Firmicutes|c__Clostridia|o__Clostridiales|f__Lachnospiraceae|g__Lachnospiraceae_unclassified|s__Eubacterium_rectale|t__SGB4933	0.0259146	112	112_92	Bacteria	Firmicutes_A	Clostridia	Lachnospirales	Lachnospiraceae	Agathobacter	rectalis	Group_112
s_9002000001570129_3.permissive	95.05	0.24	0	2403392	25517	kSGB_4933	Species	k__Bacteria|p__Firmicutes|c__Clostridia|o__Clostridiales|f__Lachnospiraceae|g__Lachnospiraceae_unclassified|s__Eubacterium_rectale|t__SGB4933	0.0260292	112	112_92	Bacteria	Firmicutes_A	Clostridia	Lachnospirales	Lachnospiraceae	Agathobacter	rectalis	Group_112
s_9002000001393561_16.strict	93.56	0	0	2060601	53153	kSGB_4933	Species	k__Bacteria|p__Firmicutes|c__Clostridia|o__Clostridiales|f__Lachnospiraceae|g__Lachnospiraceae_unclassified|s__Eubacterium_rectale|t__SGB4933	0.0266922	112	112_91	Bacteria	Firmicutes_A	Clostridia	Lachnospirales	Lachnospiraceae	Agathobacter	rectalis	Group_112
s_9002000001317659_20.strict	91.52	0	0	2533187	92339	kSGB_4933	Species	k__Bacteria|p__Firmicutes|c__Clostridia|o__Clostridiales|f__Lachnospiraceae|g__Lachnospiraceae_unclassified|s__Eubacterium_rectale|t__SGB4933	0.0282947	112	112_90	Bacteria	Firmicutes_A	Clostridia	Lachnospirales	Lachnospiraceae	Agathobacter	rectalis	Group_112
s_9002000001304937LL_11.permissive	91.22	0.24	0	1971549	25737	kSGB_4933	Species	k__Bacteria|p__Firmicutes|c__Clostridia|o__Clostridiales|f__Lachnospiraceae|g__Lachnospiraceae_unclassified|s__Eubacterium_rectale|t__SGB4933	0.0284516	112	112_9	Bacteria	Firmicutes_A	Clostridia	Lachnospirales	Lachnospiraceae	Agathobacter	rectalis	Group_112
s_9002000001517364_18.strict	97.18	0	0	2280330	39982	kSGB_4933	Species	k__Bacteria|p__Firmicutes|c__Clostridia|o__Clostridiales|f__Lachnospiraceae|g__Lachnospiraceae_unclassified|s__Eubacterium_rectale|t__SGB4933	0.0250251	112	112_89	Bacteria	Firmicutes_A	Clostridia	Lachnospirales	Lachnospiraceae	Agathobacter	rectalis	Group_112
s_9002000001271970_7.permissive	98.55	0	0	2604748	65876	kSGB_4933	Species	k__Bacteria|p__Firmicutes|c__Clostridia|o__Clostridiales|f__Lachnospiraceae|g__Lachnospiraceae_unclassified|s__Eubacterium_rectale|t__SGB4933	0.0263778	112	112_88	Bacteria	Firmicutes_A	Clostridia	Lachnospirales	Lachnospiraceae	Agathobacter	rectalis	Group_112
s_9002000001200638_47.strict	94.69	0	0	2620637	135394	kSGB_4933	Species	k__Bacteria|p__Firmicutes|c__Clostridia|o__Clostridiales|f__Lachnospiraceae|g__Lachnospiraceae_unclassified|s__Eubacterium_rectale|t__SGB4933	0.0283584	112	112_87	Bacteria	Firmicutes_A	Clostridia	Lachnospirales	Lachnospiraceae	Agathobacter	rectalis	Group_112
s_9002000001295079_8.strict	99.03	0	0	2702329	96142	kSGB_4933	Species	k__Bacteria|p__Firmicutes|c__Clostridia|o__Clostridiales|f__Lachnospiraceae|g__Lachnospiraceae_unclassified|s__Eubacterium_rectale|t__SGB4933	0.0261472	112	112_87	Bacteria	Firmicutes_A	Clostridia	Lachnospirales	Lachnospiraceae	Agathobacter	rectalis	Group_112
s_9002000001438180_13.strict	95.71	0	0	2219302	23547	kSGB_4933	Species	k__Bacteria|p__Firmicutes|c__Clostridia|o__Clostridiales|f__Lachnospiraceae|g__Lachnospiraceae_unclassified|s__Eubacterium_rectale|t__SGB4933	0.0253406	112	112_87	Bacteria	Firmicutes_A	Clostridia	Lachnospirales	Lachnospiraceae	Agathobacter	rectalis	Group_112
s_9002000001523405_16.orig	94.44	0.24	100	2408002	51418	kSGB_4933	Species	k__Bacteria|p__Firmicutes|c__Clostridia|o__Clostridiales|f__Lachnospiraceae|g__Lachnospiraceae_unclassified|s__Eubacterium_rectale|t__SGB4933	0.027433	112	112_87	Bacteria	Firmicutes_A	Clostridia	Lachnospirales	Lachnospiraceae	Agathobacter	rectalis	Group_112
s_9002000001242988_6.strict	98.55	0	0	2741669	157990	kSGB_4933	Species	k__Bacteria|p__Firmicutes|c__Clostridia|o__Clostridiales|f__Lachnospiraceae|g__Lachnospiraceae_unclassified|s__Eubacterium_rectale|t__SGB4933	0.0273527	112	112_86	Bacteria	Firmicutes_A	Clostridia	Lachnospirales	Lachnospiraceae	Agathobacter	rectalis	Group_112
s_9002000001503369_8.permissive	99.52	0	0	2808944	54582	uSGB_4935	Genus	k__Bacteria|p__Firmicutes|c__Clostridia|o__Clostridiales|f__Lachnospiraceae|g__Lachnospiraceae_unclassified|s__Lachnospiraceae_unclassified_SGB4935|t__SGB4935	0.0479134	112	112_85	Bacteria	Firmicutes_A	Clostridia	Lachnospirales	Lachnospiraceae	Agathobacter	rectalis	Group_112
s_9002000001424425_29.permissive	95.21	0	0	2271303	24161	kSGB_4933	Species	k__Bacteria|p__Firmicutes|c__Clostridia|o__Clostridiales|f__Lachnospiraceae|g__Lachnospiraceae_unclassified|s__Eubacterium_rectale|t__SGB4933	0.0253131	112	112_84	Bacteria	Firmicutes_A	Clostridia	Lachnospirales	Lachnospiraceae	Agathobacter	rectalis	Group_112
s_9002000001184329_24.strict	97.1	0	0	2544146	64949	kSGB_4933	Species	k__Bacteria|p__Firmicutes|c__Clostridia|o__Clostridiales|f__Lachnospiraceae|g__Lachnospiraceae_unclassified|s__Eubacterium_rectale|t__SGB4933	0.0261626	112	112_83	Bacteria	Firmicutes_A	Clostridia	Lachnospirales	Lachnospiraceae	Agathobacter	rectalis	Group_112
s_9002000001186403_37.strict	96.2	0	0	2591150	61723	kSGB_4933	Species	k__Bacteria|p__Firmicutes|c__Clostridia|o__Clostridiales|f__Lachnospiraceae|g__Lachnospiraceae_unclassified|s__Eubacterium_rectale|t__SGB4933	0.0261081	112	112_83	Bacteria	Firmicutes_A	Clostridia	Lachnospirales	Lachnospiraceae	Agathobacter	rectalis	Group_112
s_9002000001379150_23.strict	99.52	0	0	2482257	73616	kSGB_4933	Species	k__Bacteria|p__Firmicutes|c__Clostridia|o__Clostridiales|f__Lachnospiraceae|g__Lachnospiraceae_unclassified|s__Eubacterium_rectale|t__SGB4933	0.025698	112	112_83	Bacteria	Firmicutes_A	Clostridia	Lachnospirales	Lachnospiraceae	Agathobacter	rectalis	Group_112
s_9002000001463497_18.strict	94.99	0	0	2598345	90119	kSGB_4933	Species	k__Bacteria|p__Firmicutes|c__Clostridia|o__Clostridiales|f__Lachnospiraceae|g__Lachnospiraceae_unclassified|s__Eubacterium_rectale|t__SGB4933	0.026517	112	112_83	Bacteria	Firmicutes_A	Clostridia	Lachnospirales	Lachnospiraceae	Agathobacter	rectalis	Group_112
s_9002000001497216_9.permissive	96.76	0.16	0	2343578	33792	kSGB_4933	Species	k__Bacteria|p__Firmicutes|c__Clostridia|o__Clostridiales|f__Lachnospiraceae|g__Lachnospiraceae_unclassified|s__Eubacterium_rectale|t__SGB4933	0.0260061	112	112_83	Bacteria	Firmicutes_A	Clostridia	Lachnospirales	Lachnospiraceae	Agathobacter	rectalis	Group_112
s_9002000001501005_1.strict	94.01	0	0	2264817	33126	kSGB_4933	Species	k__Bacteria|p__Firmicutes|c__Clostridia|o__Clostridiales|f__Lachnospiraceae|g__Lachnospiraceae_unclassified|s__Eubacterium_rectale|t__SGB4933	0.0276476	112	112_82	Bacteria	Firmicutes_A	Clostridia	Lachnospirales	Lachnospiraceae	Agathobacter	rectalis	Group_112
s_9002000001262004_13.orig	94.52	0	0	2431172	32641	uSGB_4935	Genus	k__Bacteria|p__Firmicutes|c__Clostridia|o__Clostridiales|f__Lachnospiraceae|g__Lachnospiraceae_unclassified|s__Lachnospiraceae_unclassified_SGB4935|t__SGB4935	0.0470719	112	112_81	Bacteria	Firmicutes_A	Clostridia	Lachnospirales	Lachnospiraceae	Agathobacter	rectalis	Group_112
s_9002000001300660_15.strict	97.56	0.72	0	2706460	104820	kSGB_4933	Species	k__Bacteria|p__Firmicutes|c__Clostridia|o__Clostridiales|f__Lachnospiraceae|g__Lachnospiraceae_unclassified|s__Eubacterium_rectale|t__SGB4933	0.0276209	112	112_80	Bacteria	Firmicutes_A	Clostridia	Lachnospirales	Lachnospiraceae	Agathobacter	rectalis	Group_112
s_9002000001304042_13.strict	95.09	0.48	0	2030171	46717	kSGB_4933	Species	k__Bacteria|p__Firmicutes|c__Clostridia|o__Clostridiales|f__Lachnospiraceae|g__Lachnospiraceae_unclassified|s__Eubacterium_rectale|t__SGB4933	0.0281943	112	112_8	Bacteria	Firmicutes_A	Clostridia	Lachnospirales	Lachnospiraceae	Agathobacter	rectalis	Group_112
s_9002000001401430_19.permissive	97.1	0	0	2679117	91364	kSGB_4933	Species	k__Bacteria|p__Firmicutes|c__Clostridia|o__Clostridiales|f__Lachnospiraceae|g__Lachnospiraceae_unclassified|s__Eubacterium_rectale|t__SGB4933	0.0271229	112	112_79	Bacteria	Firmicutes_A	Clostridia	Lachnospirales	Lachnospiraceae	Agathobacter	rectalis	Group_112
s_9002000001531363_14.permissive	96.62	0	0	2501858	57757	kSGB_4933	Species	k__Bacteria|p__Firmicutes|c__Clostridia|o__Clostridiales|f__Lachnospiraceae|g__Lachnospiraceae_unclassified|s__Eubacterium_rectale|t__SGB4933	0.0274202	112	112_78	Bacteria	Firmicutes_A	Clostridia	Lachnospirales	Lachnospiraceae	Agathobacter	rectalis	Group_112
s_9002000001346051_5.strict	91.82	0.48	0	1988531	19260	kSGB_4933	Species	k__Bacteria|p__Firmicutes|c__Clostridia|o__Clostridiales|f__Lachnospiraceae|g__Lachnospiraceae_unclassified|s__Eubacterium_rectale|t__SGB4933	0.0264223	112	112_77	Bacteria	Firmicutes_A	Clostridia	Lachnospirales	Lachnospiraceae	Agathobacter	rectalis	Group_112
s_9002000001514308_14.strict	94.41	0	0	2487986	63605	kSGB_4933	Species	k__Bacteria|p__Firmicutes|c__Clostridia|o__Clostridiales|f__Lachnospiraceae|g__Lachnospiraceae_unclassified|s__Eubacterium_rectale|t__SGB4933	0.0270489	112	112_76	Bacteria	Firmicutes_A	Clostridia	Lachnospirales	Lachnospiraceae	Agathobacter	rectalis	Group_112
s_9002000001294380_5.permissive	92.33	0	0	2408929	71883	kSGB_4933	Species	k__Bacteria|p__Firmicutes|c__Clostridia|o__Clostridiales|f__Lachnospiraceae|g__Lachnospiraceae_unclassified|s__Eubacterium_rectale|t__SGB4933	0.0274549	112	112_75	Bacteria	Firmicutes_A	Clostridia	Lachnospirales	Lachnospiraceae	Agathobacter	rectalis	Group_112
s_9002000001466505_6.permissive	98.87	0	0	2413055	48302	kSGB_4933	Species	k__Bacteria|p__Firmicutes|c__Clostridia|o__Clostridiales|f__Lachnospiraceae|g__Lachnospiraceae_unclassified|s__Eubacterium_rectale|t__SGB4933	0.0255035	112	112_74	Bacteria	Firmicutes_A	Clostridia	Lachnospirales	Lachnospiraceae	Agathobacter	rectalis	Group_112
s_9002000001338659_18.permissive	95.01	0	0	2215132	22813	kSGB_4933	Species	k__Bacteria|p__Firmicutes|c__Clostridia|o__Clostridiales|f__Lachnospiraceae|g__Lachnospiraceae_unclassified|s__Eubacterium_rectale|t__SGB4933	0.026387	112	112_73	Bacteria	Firmicutes_A	Clostridia	Lachnospirales	Lachnospiraceae	Agathobacter	rectalis	Group_112
s_9002000001473223_41.strict	93.03	0.72	100	2076730	18778	kSGB_4933	Species	k__Bacteria|p__Firmicutes|c__Clostridia|o__Clostridiales|f__Lachnospiraceae|g__Lachnospiraceae_unclassified|s__Eubacterium_rectale|t__SGB4933	0.0264951	112	112_72	Bacteria	Firmicutes_A	Clostridia	Lachnospirales	Lachnospiraceae	Agathobacter	rectalis	Group_112
s_9002000001251234_11.strict	92.18	0.48	100	2115702	23173	kSGB_4933	Species	k__Bacteria|p__Firmicutes|c__Clostridia|o__Clostridiales|f__Lachnospiraceae|g__Lachnospiraceae_unclassified|s__Eubacterium_rectale|t__SGB4933	0.0262143	112	112_71	Bacteria	Firmicutes_A	Clostridia	Lachnospirales	Lachnospiraceae	Agathobacter	rectalis	Group_112
s_9002000001178386_32.strict	91.27	0	0	1899239	18066	kSGB_4933	Species	k__Bacteria|p__Firmicutes|c__Clostridia|o__Clostridiales|f__Lachnospiraceae|g__Lachnospiraceae_unclassified|s__Eubacterium_rectale|t__SGB4933	0.0272775	112	112_70	Bacteria	Firmicutes_A	Clostridia	Lachnospirales	Lachnospiraceae	Agathobacter	rectalis	Group_112
s_9002000001414420_1.strict	95.65	0	0	2032060	35142	kSGB_4933	Species	k__Bacteria|p__Firmicutes|c__Clostridia|o__Clostridiales|f__Lachnospiraceae|g__Lachnospiraceae_unclassified|s__Eubacterium_rectale|t__SGB4933	0.0286397	112	112_7	Bacteria	Firmicutes_A	Clostridia	Lachnospirales	Lachnospiraceae	Agathobacter	rectalis	Group_112
s_9002000001445425_16.permissive	99.03	0	0	2696259	75595	kSGB_4933	Species	k__Bacteria|p__Firmicutes|c__Clostridia|o__Clostridiales|f__Lachnospiraceae|g__Lachnospiraceae_unclassified|s__Eubacterium_rectale|t__SGB4933	0.0271138	112	112_69	Bacteria	Firmicutes_A	Clostridia	Lachnospirales	Lachnospiraceae	Agathobacter	rectalis	Group_112
s_9002000001301588_36.permissive	93.96	0.97	0	2135974	16808	kSGB_4933	Species	k__Bacteria|p__Firmicutes|c__Clostridia|o__Clostridiales|f__Lachnospiraceae|g__Lachnospiraceae_unclassified|s__Eubacterium_rectale|t__SGB4933	0.0269907	112	112_68	Bacteria	Firmicutes_A	Clostridia	Lachnospirales	Lachnospiraceae	Agathobacter	rectalis	Group_112
s_9002000001352086_33.strict	98.07	0	0	2524950	86161	kSGB_4933	Species	k__Bacteria|p__Firmicutes|c__Clostridia|o__Clostridiales|f__Lachnospiraceae|g__Lachnospiraceae_unclassified|s__Eubacterium_rectale|t__SGB4933	0.0271726	112	112_67	Bacteria	Firmicutes_A	Clostridia	Lachnospirales	Lachnospiraceae	Agathobacter	rectalis	Group_112
s_9002000001531940_3.strict	99.52	0	0	2782306	80040	kSGB_4933	Species	k__Bacteria|p__Firmicutes|c__Clostridia|o__Clostridiales|f__Lachnospiraceae|g__Lachnospiraceae_unclassified|s__Eubacterium_rectale|t__SGB4933	0.0268009	112	112_67	Bacteria	Firmicutes_A	Clostridia	Lachnospirales	Lachnospiraceae	Agathobacter	rectalis	Group_112
s_9002000001527647_22.strict	96.62	0.72	50	2305806	30469	kSGB_4933	Species	k__Bacteria|p__Firmicutes|c__Clostridia|o__Clostridiales|f__Lachnospiraceae|g__Lachnospiraceae_unclassified|s__Eubacterium_rectale|t__SGB4933	0.0262121	112	112_66	Bacteria	Firmicutes_A	Clostridia	Lachnospirales	Lachnospiraceae	Agathobacter	rectalis	Group_112
s_9002000001303715_26.permissive	98.55	0	0	2664115	69272	kSGB_4933	Species	k__Bacteria|p__Firmicutes|c__Clostridia|o__Clostridiales|f__Lachnospiraceae|g__Lachnospiraceae_unclassified|s__Eubacterium_rectale|t__SGB4933	0.0269251	112	112_65	Bacteria	Firmicutes_A	Clostridia	Lachnospirales	Lachnospiraceae	Agathobacter	rectalis	Group_112
s_9002000001308622_10.permissive	97.58	0	0	2722423	73530	kSGB_4933	Species	k__Bacteria|p__Firmicutes|c__Clostridia|o__Clostridiales|f__Lachnospiraceae|g__Lachnospiraceae_unclassified|s__Eubacterium_rectale|t__SGB4933	0.0273216	112	112_64	Bacteria	Firmicutes_A	Clostridia	Lachnospirales	Lachnospiraceae	Agathobacter	rectalis	Group_112
s_9002000001350303_1.permissive	94.87	0.24	0	2241616	14149	kSGB_4933	Species	k__Bacteria|p__Firmicutes|c__Clostridia|o__Clostridiales|f__Lachnospiraceae|g__Lachnospiraceae_unclassified|s__Eubacterium_rectale|t__SGB4933	0.0264471	112	112_63	Bacteria	Firmicutes_A	Clostridia	Lachnospirales	Lachnospiraceae	Agathobacter	rectalis	Group_112
s_9002000001350528_34.strict	97.6	0.24	0	2429228	23752	kSGB_4933	Species	k__Bacteria|p__Firmicutes|c__Clostridia|o__Clostridiales|f__Lachnospiraceae|g__Lachnospiraceae_unclassified|s__Eubacterium_rectale|t__SGB4933	0.0264194	112	112_63	Bacteria	Firmicutes_A	Clostridia	Lachnospirales	Lachnospiraceae	Agathobacter	rectalis	Group_112
s_9002000001476459_15.permissive	90.36	0	0	2050472	25302	kSGB_4933	Species	k__Bacteria|p__Firmicutes|c__Clostridia|o__Clostridiales|f__Lachnospiraceae|g__Lachnospiraceae_unclassified|s__Eubacterium_rectale|t__SGB4933	0.0269782	112	112_62	Bacteria	Firmicutes_A	Clostridia	Lachnospirales	Lachnospiraceae	Agathobacter	rectalis	Group_112
s_9002000001226278LL_3.permissive	96.51	0	0	2518882	68614	kSGB_4933	Species	k__Bacteria|p__Firmicutes|c__Clostridia|o__Clostridiales|f__Lachnospiraceae|g__Lachnospiraceae_unclassified|s__Eubacterium_rectale|t__SGB4933	0.0260687	112	112_61	Bacteria	Firmicutes_A	Clostridia	Lachnospirales	Lachnospiraceae	Agathobacter	rectalis	Group_112
s_9002000001341467_1.permissive	90.76	1.13	33.33	2202094	15615	kSGB_4933	Species	k__Bacteria|p__Firmicutes|c__Clostridia|o__Clostridiales|f__Lachnospiraceae|g__Lachnospiraceae_unclassified|s__Eubacterium_rectale|t__SGB4933	0.0259446	112	112_61	Bacteria	Firmicutes_A	Clostridia	Lachnospirales	Lachnospiraceae	Agathobacter	rectalis	Group_112
s_9002000001338668_11.strict	96.62	0	0	2733034	123378	kSGB_4933	Species	k__Bacteria|p__Firmicutes|c__Clostridia|o__Clostridiales|f__Lachnospiraceae|g__Lachnospiraceae_unclassified|s__Eubacterium_rectale|t__SGB4933	0.0290373	112	112_60	Bacteria	Firmicutes_A	Clostridia	Lachnospirales	Lachnospiraceae	Agathobacter	rectalis	Group_112
s_9002000001340924_8.permissive	92.59	0	0	1967163	28759	kSGB_4933	Species	k__Bacteria|p__Firmicutes|c__Clostridia|o__Clostridiales|f__Lachnospiraceae|g__Lachnospiraceae_unclassified|s__Eubacterium_rectale|t__SGB4933	0.0289095	112	112_6	Bacteria	Firmicutes_A	Clostridia	Lachnospirales	Lachnospiraceae	Agathobacter	rectalis	Group_112
s_9002000001243214_4.strict	96.62	0	0	2469554	51173	kSGB_4933	Species	k__Bacteria|p__Firmicutes|c__Clostridia|o__Clostridiales|f__Lachnospiraceae|g__Lachnospiraceae_unclassified|s__Eubacterium_rectale|t__SGB4933	0.0272052	112	112_59	Bacteria	Firmicutes_A	Clostridia	Lachnospirales	Lachnospiraceae	Agathobacter	rectalis	Group_112
s_9002000001322390_25.permissive	92.82	0.82	33.33	2020220	16288	kSGB_4933	Species	k__Bacteria|p__Firmicutes|c__Clostridia|o__Clostridiales|f__Lachnospiraceae|g__Lachnospiraceae_unclassified|s__Eubacterium_rectale|t__SGB4933	0.0296943	112	112_58	Bacteria	Firmicutes_A	Clostridia	Lachnospirales	Lachnospiraceae	Agathobacter	rectalis	Group_112
s_9002000001375980_30.permissive	90.02	0.43	33.33	1894517	8747	kSGB_4933	Species	k__Bacteria|p__Firmicutes|c__Clostridia|o__Clostridiales|f__Lachnospiraceae|g__Lachnospiraceae_unclassified|s__Eubacterium_rectale|t__SGB4933	0.0301385	112	112_57	Bacteria	Firmicutes_A	Clostridia	Lachnospirales	Lachnospiraceae	Agathobacter	rectalis	Group_112
s_9002000001250148_13.permissive	98.55	0.48	0	2339076	74373	kSGB_4933	Species	k__Bacteria|p__Firmicutes|c__Clostridia|o__Clostridiales|f__Lachnospiraceae|g__Lachnospiraceae_unclassified|s__Eubacterium_rectale|t__SGB4933	0.0296728	112	112_56	Bacteria	Firmicutes_A	Clostridia	Lachnospirales	Lachnospiraceae	Agathobacter	rectalis	Group_112
s_9002000001343701_28.strict	98.07	0	0	2232581	71248	kSGB_4933	Species	k__Bacteria|p__Firmicutes|c__Clostridia|o__Clostridiales|f__Lachnospiraceae|g__Lachnospiraceae_unclassified|s__Eubacterium_rectale|t__SGB4933	0.0286818	112	112_55	Bacteria	Firmicutes_A	Clostridia	Lachnospirales	Lachnospiraceae	Agathobacter	rectalis	Group_112
s_9002000001374735_26.strict	97.91	0	0	2278014	116901	kSGB_4933	Species	k__Bacteria|p__Firmicutes|c__Clostridia|o__Clostridiales|f__Lachnospiraceae|g__Lachnospiraceae_unclassified|s__Eubacterium_rectale|t__SGB4933	0.0296306	112	112_54	Bacteria	Firmicutes_A	Clostridia	Lachnospirales	Lachnospiraceae	Agathobacter	rectalis	Group_112
s_9002000001478005ALL_2.strict	99.52	0	0	2365170	99832	kSGB_4933	Species	k__Bacteria|p__Firmicutes|c__Clostridia|o__Clostridiales|f__Lachnospiraceae|g__Lachnospiraceae_unclassified|s__Eubacterium_rectale|t__SGB4933	0.0295127	112	112_53	Bacteria	Firmicutes_A	Clostridia	Lachnospirales	Lachnospiraceae	Agathobacter	rectalis	Group_112
s_9002000001410009LL_44.strict	91.39	0.16	100	1864428	15808	kSGB_4933	Species	k__Bacteria|p__Firmicutes|c__Clostridia|o__Clostridiales|f__Lachnospiraceae|g__Lachnospiraceae_unclassified|s__Eubacterium_rectale|t__SGB4933	0.0295516	112	112_52	Bacteria	Firmicutes_A	Clostridia	Lachnospirales	Lachnospiraceae	Agathobacter	rectalis	Group_112
s_9002000001310371LL_2.permissive	97.34	0	0	2180563	37761	kSGB_4933	Species	k__Bacteria|p__Firmicutes|c__Clostridia|o__Clostridiales|f__Lachnospiraceae|g__Lachnospiraceae_unclassified|s__Eubacterium_rectale|t__SGB4933	0.0283562	112	112_51	Bacteria	Firmicutes_A	Clostridia	Lachnospirales	Lachnospiraceae	Agathobacter	rectalis	Group_112
s_9002000001523343_19.strict	91.61	0	0	1876764	22721	kSGB_4933	Species	k__Bacteria|p__Firmicutes|c__Clostridia|o__Clostridiales|f__Lachnospiraceae|g__Lachnospiraceae_unclassified|s__Eubacterium_rectale|t__SGB4933	0.0280789	112	112_50	Bacteria	Firmicutes_A	Clostridia	Lachnospirales	Lachnospiraceae	Agathobacter	rectalis	Group_112
s_9002000001473840_6.permissive	95.75	0	0	2133156	22586	kSGB_4933	Species	k__Bacteria|p__Firmicutes|c__Clostridia|o__Clostridiales|f__Lachnospiraceae|g__Lachnospiraceae_unclassified|s__Eubacterium_rectale|t__SGB4933	0.0292556	112	112_5	Bacteria	Firmicutes_A	Clostridia	Lachnospirales	Lachnospiraceae	Agathobacter	rectalis	Group_112
s_9002000001307240_24.permissive	93.72	0.48	0	2414880	118168	kSGB_4933	Species	k__Bacteria|p__Firmicutes|c__Clostridia|o__Clostridiales|f__Lachnospiraceae|g__Lachnospiraceae_unclassified|s__Eubacterium_rectale|t__SGB4933	0.0310295	112	112_49	Bacteria	Firmicutes_A	Clostridia	Lachnospirales	Lachnospiraceae	Agathobacter	rectalis	Group_112
s_9002000001552710_15.strict	93.92	0	0	1980014	24558	kSGB_4933	Species	k__Bacteria|p__Firmicutes|c__Clostridia|o__Clostridiales|f__Lachnospiraceae|g__Lachnospiraceae_unclassified|s__Eubacterium_rectale|t__SGB4933	0.0296583	112	112_48	Bacteria	Firmicutes_A	Clostridia	Lachnospirales	Lachnospiraceae	Agathobacter	rectalis	Group_112
s_9002000001227892_6.permissive	98.09	0	0	2231456	48541	kSGB_4933	Species	k__Bacteria|p__Firmicutes|c__Clostridia|o__Clostridiales|f__Lachnospiraceae|g__Lachnospiraceae_unclassified|s__Eubacterium_rectale|t__SGB4933	0.0295671	112	112_47	Bacteria	Firmicutes_A	Clostridia	Lachnospirales	Lachnospiraceae	Agathobacter	rectalis	Group_112
s_9002000001580090_16.strict	97.34	0.48	0	2231476	67065	kSGB_4933	Species	k__Bacteria|p__Firmicutes|c__Clostridia|o__Clostridiales|f__Lachnospiraceae|g__Lachnospiraceae_unclassified|s__Eubacterium_rectale|t__SGB4933	0.0287193	112	112_46	Bacteria	Firmicutes_A	Clostridia	Lachnospirales	Lachnospiraceae	Agathobacter	rectalis	Group_112
s_9002000001367051_21.permissive	99.36	0.48	0	2249288	70945	kSGB_4933	Species	k__Bacteria|p__Firmicutes|c__Clostridia|o__Clostridiales|f__Lachnospiraceae|g__Lachnospiraceae_unclassified|s__Eubacterium_rectale|t__SGB4933	0.0282982	112	112_45	Bacteria	Firmicutes_A	Clostridia	Lachnospirales	Lachnospiraceae	Agathobacter	rectalis	Group_112
s_9002000001206711LL_25.strict	97.58	0.48	0	2302734	127636	kSGB_4933	Species	k__Bacteria|p__Firmicutes|c__Clostridia|o__Clostridiales|f__Lachnospiraceae|g__Lachnospiraceae_unclassified|s__Eubacterium_rectale|t__SGB4933	0.029802	112	112_44	Bacteria	Firmicutes_A	Clostridia	Lachnospirales	Lachnospiraceae	Agathobacter	rectalis	Group_112
s_9002000001435296_14.strict	96.62	0.48	0	2088068	24455	kSGB_4933	Species	k__Bacteria|p__Firmicutes|c__Clostridia|o__Clostridiales|f__Lachnospiraceae|g__Lachnospiraceae_unclassified|s__Eubacterium_rectale|t__SGB4933	0.0287293	112	112_43	Bacteria	Firmicutes_A	Clostridia	Lachnospirales	Lachnospiraceae	Agathobacter	rectalis	Group_112
s_9002000001428569_11.permissive	93.84	0.1	100	1973011	18489	kSGB_4933	Species	k__Bacteria|p__Firmicutes|c__Clostridia|o__Clostridiales|f__Lachnospiraceae|g__Lachnospiraceae_unclassified|s__Eubacterium_rectale|t__SGB4933	0.0281951	112	112_42	Bacteria	Firmicutes_A	Clostridia	Lachnospirales	Lachnospiraceae	Agathobacter	rectalis	Group_112
s_9002000001510130_19.permissive	91.32	0.48	0	2131009	56225	kSGB_4933	Species	k__Bacteria|p__Firmicutes|c__Clostridia|o__Clostridiales|f__Lachnospiraceae|g__Lachnospiraceae_unclassified|s__Eubacterium_rectale|t__SGB4933	0.0301252	112	112_41	Bacteria	Firmicutes_A	Clostridia	Lachnospirales	Lachnospiraceae	Agathobacter	rectalis	Group_112
s_9002000001512770_30.strict	90.84	0.48	0	1858080	22295	kSGB_4933	Species	k__Bacteria|p__Firmicutes|c__Clostridia|o__Clostridiales|f__Lachnospiraceae|g__Lachnospiraceae_unclassified|s__Eubacterium_rectale|t__SGB4933	0.0285677	112	112_40	Bacteria	Firmicutes_A	Clostridia	Lachnospirales	Lachnospiraceae	Agathobacter	rectalis	Group_112
s_9002000001334186_18.permissive	93.12	0	0	1880318	13149	kSGB_4933	Species	k__Bacteria|p__Firmicutes|c__Clostridia|o__Clostridiales|f__Lachnospiraceae|g__Lachnospiraceae_unclassified|s__Eubacterium_rectale|t__SGB4933	0.0299359	112	112_4	Bacteria	Firmicutes_A	Clostridia	Lachnospirales	Lachnospiraceae	Agathobacter	rectalis	Group_112
s_9002000001260888_7.strict	94.69	0.48	0	2281167	135818	kSGB_4933	Species	k__Bacteria|p__Firmicutes|c__Clostridia|o__Clostridiales|f__Lachnospiraceae|g__Lachnospiraceae_unclassified|s__Eubacterium_rectale|t__SGB4933	0.0307672	112	112_39	Bacteria	Firmicutes_A	Clostridia	Lachnospirales	Lachnospiraceae	Agathobacter	rectalis	Group_112
s_9002000001385621_43.permissive	97.1	0.48	0	2260742	57642	kSGB_4933	Species	k__Bacteria|p__Firmicutes|c__Clostridia|o__Clostridiales|f__Lachnospiraceae|g__Lachnospiraceae_unclassified|s__Eubacterium_rectale|t__SGB4933	0.0288467	112	112_39	Bacteria	Firmicutes_A	Clostridia	Lachnospirales	Lachnospiraceae	Agathobacter	rectalis	Group_112
s_9002000001393703_12.permissive	91.73	0.97	0	2090413	48472	kSGB_4933	Species	k__Bacteria|p__Firmicutes|c__Clostridia|o__Clostridiales|f__Lachnospiraceae|g__Lachnospiraceae_unclassified|s__Eubacterium_rectale|t__SGB4933	0.0293733	112	112_39	Bacteria	Firmicutes_A	Clostridia	Lachnospirales	Lachnospiraceae	Agathobacter	rectalis	Group_112
s_9002000001446594_30.strict	95.7	0.48	0	1962257	22877	kSGB_4933	Species	k__Bacteria|p__Firmicutes|c__Clostridia|o__Clostridiales|f__Lachnospiraceae|g__Lachnospiraceae_unclassified|s__Eubacterium_rectale|t__SGB4933	0.0285126	112	112_39	Bacteria	Firmicutes_A	Clostridia	Lachnospirales	Lachnospiraceae	Agathobacter	rectalis	Group_112
s_9002000001328080LL_17.permissive	91.2	0.26	50	1909395	11659	kSGB_4933	Species	k__Bacteria|p__Firmicutes|c__Clostridia|o__Clostridiales|f__Lachnospiraceae|g__Lachnospiraceae_unclassified|s__Eubacterium_rectale|t__SGB4933	0.0293087	112	112_38	Bacteria	Firmicutes_A	Clostridia	Lachnospirales	Lachnospiraceae	Agathobacter	rectalis	Group_112
s_9002000001295785_1.permissive	91.95	0	0	1876121	16992	kSGB_4933	Species	k__Bacteria|p__Firmicutes|c__Clostridia|o__Clostridiales|f__Lachnospiraceae|g__Lachnospiraceae_unclassified|s__Eubacterium_rectale|t__SGB4933	0.0284181	112	112_37	Bacteria	Firmicutes_A	Clostridia	Lachnospirales	Lachnospiraceae	Agathobacter	rectalis	Group_112
s_9002000001482920_28.permissive	99.03	0	0	2303195	69984	kSGB_4933	Species	k__Bacteria|p__Firmicutes|c__Clostridia|o__Clostridiales|f__Lachnospiraceae|g__Lachnospiraceae_unclassified|s__Eubacterium_rectale|t__SGB4933	0.0294233	112	112_36	Bacteria	Firmicutes_A	Clostridia	Lachnospirales	Lachnospiraceae	Agathobacter	rectalis	Group_112
s_9002000001285887_8.orig	95.42	0.24	100	1991504	18833	kSGB_4933	Species	k__Bacteria|p__Firmicutes|c__Clostridia|o__Clostridiales|f__Lachnospiraceae|g__Lachnospiraceae_unclassified|s__Eubacterium_rectale|t__SGB4933	0.0289696	112	112_35	Bacteria	Firmicutes_A	Clostridia	Lachnospirales	Lachnospiraceae	Agathobacter	rectalis	Group_112
s_9002000001338013_31.permissive	98.07	0	0	2323974	71016	kSGB_4933	Species	k__Bacteria|p__Firmicutes|c__Clostridia|o__Clostridiales|f__Lachnospiraceae|g__Lachnospiraceae_unclassified|s__Eubacterium_rectale|t__SGB4933	0.0291557	112	112_34	Bacteria	Firmicutes_A	Clostridia	Lachnospirales	Lachnospiraceae	Agathobacter	rectalis	Group_112
s_9002000001558115_11.orig	91.61	0.58	33.33	1805896	12785	kSGB_4933	Species	k__Bacteria|p__Firmicutes|c__Clostridia|o__Clostridiales|f__Lachnospiraceae|g__Lachnospiraceae_unclassified|s__Eubacterium_rectale|t__SGB4933	0.0295872	112	112_33	Bacteria	Firmicutes_A	Clostridia	Lachnospirales	Lachnospiraceae	Agathobacter	rectalis	Group_112
s_9002000001361675_18.permissive	97.34	0	0	2412472	92396	kSGB_4933	Species	k__Bacteria|p__Firmicutes|c__Clostridia|o__Clostridiales|f__Lachnospiraceae|g__Lachnospiraceae_unclassified|s__Eubacterium_rectale|t__SGB4933	0.0304252	112	112_32	Bacteria	Firmicutes_A	Clostridia	Lachnospirales	Lachnospiraceae	Agathobacter	rectalis	Group_112
s_9002000001226607_17.permissive	96.38	0	0	2183528	45070	kSGB_4933	Species	k__Bacteria|p__Firmicutes|c__Clostridia|o__Clostridiales|f__Lachnospiraceae|g__Lachnospiraceae_unclassified|s__Eubacterium_rectale|t__SGB4933	0.0291916	112	112_31	Bacteria	Firmicutes_A	Clostridia	Lachnospirales	Lachnospiraceae	Agathobacter	rectalis	Group_112
s_9002000001472585_4.strict	93.63	0	0	1928635	17581	kSGB_4933	Species	k__Bacteria|p__Firmicutes|c__Clostridia|o__Clostridiales|f__Lachnospiraceae|g__Lachnospiraceae_unclassified|s__Eubacterium_rectale|t__SGB4933	0.028701	112	112_30	Bacteria	Firmicutes_A	Clostridia	Lachnospirales	Lachnospiraceae	Agathobacter	rectalis	Group_112
s_9002000001425146_33.strict	94.93	0.48	0	2035776	50101	kSGB_4933	Species	k__Bacteria|p__Firmicutes|c__Clostridia|o__Clostridiales|f__Lachnospiraceae|g__Lachnospiraceae_unclassified|s__Eubacterium_rectale|t__SGB4933	0.028385	112	112_3	Bacteria	Firmicutes_A	Clostridia	Lachnospirales	Lachnospiraceae	Agathobacter	rectalis	Group_112
s_9002000001359499_13.strict	97.26	0	0	2201476	52533	kSGB_4933	Species	k__Bacteria|p__Firmicutes|c__Clostridia|o__Clostridiales|f__Lachnospiraceae|g__Lachnospiraceae_unclassified|s__Eubacterium_rectale|t__SGB4933	0.0291096	112	112_29	Bacteria	Firmicutes_A	Clostridia	Lachnospirales	Lachnospiraceae	Agathobacter	rectalis	Group_112
s_9002000001425650_23.strict	94.69	0.48	0	2174017	55675	kSGB_4933	Species	k__Bacteria|p__Firmicutes|c__Clostridia|o__Clostridiales|f__Lachnospiraceae|g__Lachnospiraceae_unclassified|s__Eubacterium_rectale|t__SGB4933	0.0292957	112	112_28	Bacteria	Firmicutes_A	Clostridia	Lachnospirales	Lachnospiraceae	Agathobacter	rectalis	Group_112
s_9002000001232168_9.permissive	93.93	0	0	1962985	18502	kSGB_4933	Species	k__Bacteria|p__Firmicutes|c__Clostridia|o__Clostridiales|f__Lachnospiraceae|g__Lachnospiraceae_unclassified|s__Eubacterium_rectale|t__SGB4933	0.0288336	112	112_27	Bacteria	Firmicutes_A	Clostridia	Lachnospirales	Lachnospiraceae	Agathobacter	rectalis	Group_112
s_9002000001530894_23.strict	91.2	0	0	1771629	18551	kSGB_4933	Species	k__Bacteria|p__Firmicutes|c__Clostridia|o__Clostridiales|f__Lachnospiraceae|g__Lachnospiraceae_unclassified|s__Eubacterium_rectale|t__SGB4933	0.0296951	112	112_26	Bacteria	Firmicutes_A	Clostridia	Lachnospirales	Lachnospiraceae	Agathobacter	rectalis	Group_112
s_9002000001428590_27.permissive	91.63	0	0	2086711	36090	kSGB_4933	Species	k__Bacteria|p__Firmicutes|c__Clostridia|o__Clostridiales|f__Lachnospiraceae|g__Lachnospiraceae_unclassified|s__Eubacterium_rectale|t__SGB4933	0.0295643	112	112_25	Bacteria	Firmicutes_A	Clostridia	Lachnospirales	Lachnospiraceae	Agathobacter	rectalis	Group_112
s_9002000001556980LL_15.permissive	91.55	0	0	2141356	79383	kSGB_4933	Species	k__Bacteria|p__Firmicutes|c__Clostridia|o__Clostridiales|f__Lachnospiraceae|g__Lachnospiraceae_unclassified|s__Eubacterium_rectale|t__SGB4933	0.0321172	112	112_24	Bacteria	Firmicutes_A	Clostridia	Lachnospirales	Lachnospiraceae	Agathobacter	rectalis	Group_112
s_9002000001404066_25.strict	96.67	0	0	2219426	33570	kSGB_4933	Species	k__Bacteria|p__Firmicutes|c__Clostridia|o__Clostridiales|f__Lachnospiraceae|g__Lachnospiraceae_unclassified|s__Eubacterium_rectale|t__SGB4933	0.0286606	112	112_23	Bacteria	Firmicutes_A	Clostridia	Lachnospirales	Lachnospiraceae	Agathobacter	rectalis	Group_112
s_9002000001459770_17.permissive	90.34	0.48	0	2049728	39982	kSGB_4933	Species	k__Bacteria|p__Firmicutes|c__Clostridia|o__Clostridiales|f__Lachnospiraceae|g__Lachnospiraceae_unclassified|s__Eubacterium_rectale|t__SGB4933	0.0301365	112	112_22	Bacteria	Firmicutes_A	Clostridia	Lachnospirales	Lachnospiraceae	Agathobacter	rectalis	Group_112
s_9002000001225234_9.permissive	98.63	0.48	0	2419493	86709	kSGB_4933	Species	k__Bacteria|p__Firmicutes|c__Clostridia|o__Clostridiales|f__Lachnospiraceae|g__Lachnospiraceae_unclassified|s__Eubacterium_rectale|t__SGB4933	0.0298017	112	112_21	Bacteria	Firmicutes_A	Clostridia	Lachnospirales	Lachnospiraceae	Agathobacter	rectalis	Group_112
s_9002000001407430_1.permissive	97.52	0	0	2149104	24370	kSGB_4933	Species	k__Bacteria|p__Firmicutes|c__Clostridia|o__Clostridiales|f__Lachnospiraceae|g__Lachnospiraceae_unclassified|s__Eubacterium_rectale|t__SGB4933	0.0290117	112	112_20	Bacteria	Firmicutes_A	Clostridia	Lachnospirales	Lachnospiraceae	Agathobacter	rectalis	Group_112
s_9002000001346540_15.permissive	98.55	0	0	2194005	53686	kSGB_4933	Species	k__Bacteria|p__Firmicutes|c__Clostridia|o__Clostridiales|f__Lachnospiraceae|g__Lachnospiraceae_unclassified|s__Eubacterium_rectale|t__SGB4933	0.0293755	112	112_2	Bacteria	Firmicutes_A	Clostridia	Lachnospirales	Lachnospiraceae	Agathobacter	rectalis	Group_112
s_9002000001357654_14.permissive	94.44	0.97	0	2451719	48735	kSGB_4933	Species	k__Bacteria|p__Firmicutes|c__Clostridia|o__Clostridiales|f__Lachnospiraceae|g__Lachnospiraceae_unclassified|s__Eubacterium_rectale|t__SGB4933	0.0328252	112	112_19	Bacteria	Firmicutes_A	Clostridia	Lachnospirales	Lachnospiraceae	Agathobacter	rectalis	Group_112
s_9002000001395539_51.permissive	95.17	0.48	0	1994808	18690	kSGB_4933	Species	k__Bacteria|p__Firmicutes|c__Clostridia|o__Clostridiales|f__Lachnospiraceae|g__Lachnospiraceae_unclassified|s__Eubacterium_rectale|t__SGB4933	0.0282328	112	112_18	Bacteria	Firmicutes_A	Clostridia	Lachnospirales	Lachnospiraceae	Agathobacter	rectalis	Group_112
s_9002000001338416_5.permissive	98.07	0.48	0	2273538	79165	kSGB_4933	Species	k__Bacteria|p__Firmicutes|c__Clostridia|o__Clostridiales|f__Lachnospiraceae|g__Lachnospiraceae_unclassified|s__Eubacterium_rectale|t__SGB4933	0.0288154	112	112_17	Bacteria	Firmicutes_A	Clostridia	Lachnospirales	Lachnospiraceae	Agathobacter	rectalis	Group_112
s_9002000001280218_20.permissive	96.62	0.54	0	2119079	53084	kSGB_4933	Species	k__Bacteria|p__Firmicutes|c__Clostridia|o__Clostridiales|f__Lachnospiraceae|g__Lachnospiraceae_unclassified|s__Eubacterium_rectale|t__SGB4933	0.0284382	112	112_16	Bacteria	Firmicutes_A	Clostridia	Lachnospirales	Lachnospiraceae	Agathobacter	rectalis	Group_112
s_9002000001295598_20.permissive	97.1	0.48	0	2453043	63080	kSGB_4933	Species	k__Bacteria|p__Firmicutes|c__Clostridia|o__Clostridiales|f__Lachnospiraceae|g__Lachnospiraceae_unclassified|s__Eubacterium_rectale|t__SGB4933	0.0311704	112	112_15	Bacteria	Firmicutes_A	Clostridia	Lachnospirales	Lachnospiraceae	Agathobacter	rectalis	Group_112
s_9002000001264644_12.permissive	97.85	0.48	0	2211964	45301	kSGB_4933	Species	k__Bacteria|p__Firmicutes|c__Clostridia|o__Clostridiales|f__Lachnospiraceae|g__Lachnospiraceae_unclassified|s__Eubacterium_rectale|t__SGB4933	0.0281855	112	112_14	Bacteria	Firmicutes_A	Clostridia	Lachnospirales	Lachnospiraceae	Agathobacter	rectalis	Group_112
s_9002000001233610_1.permissive	95.17	0.48	0	2190935	54613	kSGB_4933	Species	k__Bacteria|p__Firmicutes|c__Clostridia|o__Clostridiales|f__Lachnospiraceae|g__Lachnospiraceae_unclassified|s__Eubacterium_rectale|t__SGB4933	0.0297537	112	112_13	Bacteria	Firmicutes_A	Clostridia	Lachnospirales	Lachnospiraceae	Agathobacter	rectalis	Group_112
s_9002000001369109_9.strict	97.99	0.48	0	2116308	29851	kSGB_4933	Species	k__Bacteria|p__Firmicutes|c__Clostridia|o__Clostridiales|f__Lachnospiraceae|g__Lachnospiraceae_unclassified|s__Eubacterium_rectale|t__SGB4933	0.0283634	112	112_12	Bacteria	Firmicutes_A	Clostridia	Lachnospirales	Lachnospiraceae	Agathobacter	rectalis	Group_112
s_9002000001450040_23.orig	91.8	3.31	66.67	1949946	6915	kSGB_4933	Species	k__Bacteria|p__Firmicutes|c__Clostridia|o__Clostridiales|f__Lachnospiraceae|g__Lachnospiraceae_unclassified|s__Eubacterium_rectale|t__SGB4933	0.0272353	112	112_117	Bacteria	Firmicutes_A	Clostridia	Lachnospirales	Lachnospiraceae	Agathobacter	rectalis	Group_112
s_9002000001179490_12.strict	98.34	0	0	2785295	117588	kSGB_4933	Species	k__Bacteria|p__Firmicutes|c__Clostridia|o__Clostridiales|f__Lachnospiraceae|g__Lachnospiraceae_unclassified|s__Eubacterium_rectale|t__SGB4933	0.0280372	112	112_116	Bacteria	Firmicutes_A	Clostridia	Lachnospirales	Lachnospiraceae	Agathobacter	rectalis	Group_112
s_9002000001305350_11.strict	92.91	0.48	0	2960939	90444	kSGB_4933	Species	k__Bacteria|p__Firmicutes|c__Clostridia|o__Clostridiales|f__Lachnospiraceae|g__Lachnospiraceae_unclassified|s__Eubacterium_rectale|t__SGB4933	0.0327531	112	112_115	Bacteria	Firmicutes_A	Clostridia	Lachnospirales	Lachnospiraceae	Agathobacter	rectalis	Group_112
s_9002000001454080_8.permissive	95.96	0	0	2851410	53957	kSGB_4933	Species	k__Bacteria|p__Firmicutes|c__Clostridia|o__Clostridiales|f__Lachnospiraceae|g__Lachnospiraceae_unclassified|s__Eubacterium_rectale|t__SGB4933	0.0286641	112	112_114	Bacteria	Firmicutes_A	Clostridia	Lachnospirales	Lachnospiraceae	Agathobacter	rectalis	Group_112
s_9002000001377630_43.strict	95.33	0	0	2363579	29923	kSGB_4933	Species	k__Bacteria|p__Firmicutes|c__Clostridia|o__Clostridiales|f__Lachnospiraceae|g__Lachnospiraceae_unclassified|s__Eubacterium_rectale|t__SGB4933	0.0262158	112	112_113	Bacteria	Firmicutes_A	Clostridia	Lachnospirales	Lachnospiraceae	Agathobacter	rectalis	Group_112
s_9002000001278828_26.permissive	93.24	0	0	2263848	28406	kSGB_4933	Species	k__Bacteria|p__Firmicutes|c__Clostridia|o__Clostridiales|f__Lachnospiraceae|g__Lachnospiraceae_unclassified|s__Eubacterium_rectale|t__SGB4933	0.0254323	112	112_112	Bacteria	Firmicutes_A	Clostridia	Lachnospirales	Lachnospiraceae	Agathobacter	rectalis	Group_112
s_9002000001380900_31.permissive	96.62	0	0	2402915	61823	kSGB_4933	Species	k__Bacteria|p__Firmicutes|c__Clostridia|o__Clostridiales|f__Lachnospiraceae|g__Lachnospiraceae_unclassified|s__Eubacterium_rectale|t__SGB4933	0.0259943	112	112_111	Bacteria	Firmicutes_A	Clostridia	Lachnospirales	Lachnospiraceae	Agathobacter	rectalis	Group_112
s_9002000001400933_29.permissive	95.65	0	0	2350414	86234	kSGB_4933	Species	k__Bacteria|p__Firmicutes|c__Clostridia|o__Clostridiales|f__Lachnospiraceae|g__Lachnospiraceae_unclassified|s__Eubacterium_rectale|t__SGB4933	0.0256667	112	112_110	Bacteria	Firmicutes_A	Clostridia	Lachnospirales	Lachnospiraceae	Agathobacter	rectalis	Group_112
s_9002000001231803_6.strict	94.12	0.48	0	1928112	22623	kSGB_4933	Species	k__Bacteria|p__Firmicutes|c__Clostridia|o__Clostridiales|f__Lachnospiraceae|g__Lachnospiraceae_unclassified|s__Eubacterium_rectale|t__SGB4933	0.0286514	112	112_11	Bacteria	Firmicutes_A	Clostridia	Lachnospirales	Lachnospiraceae	Agathobacter	rectalis	Group_112
s_9002000001375110_27.strict	90.65	0.97	50	2139838	13420	kSGB_4933	Species	k__Bacteria|p__Firmicutes|c__Clostridia|o__Clostridiales|f__Lachnospiraceae|g__Lachnospiraceae_unclassified|s__Eubacterium_rectale|t__SGB4933	0.0267234	112	112_109	Bacteria	Firmicutes_A	Clostridia	Lachnospirales	Lachnospiraceae	Agathobacter	rectalis	Group_112
s_9002000001577190_33.strict	94.42	1.45	0	2175113	12245	kSGB_4933	Species	k__Bacteria|p__Firmicutes|c__Clostridia|o__Clostridiales|f__Lachnospiraceae|g__Lachnospiraceae_unclassified|s__Eubacterium_rectale|t__SGB4933	0.0255804	112	112_108	Bacteria	Firmicutes_A	Clostridia	Lachnospirales	Lachnospiraceae	Agathobacter	rectalis	Group_112
s_9002000001352980_26.permissive	94.52	0	0	2373620	29213	kSGB_4933	Species	k__Bacteria|p__Firmicutes|c__Clostridia|o__Clostridiales|f__Lachnospiraceae|g__Lachnospiraceae_unclassified|s__Eubacterium_rectale|t__SGB4933	0.0261776	112	112_107	Bacteria	Firmicutes_A	Clostridia	Lachnospirales	Lachnospiraceae	Agathobacter	rectalis	Group_112
s_9002000001477886_12.permissive	98.31	0	0	2374651	31344	kSGB_4933	Species	k__Bacteria|p__Firmicutes|c__Clostridia|o__Clostridiales|f__Lachnospiraceae|g__Lachnospiraceae_unclassified|s__Eubacterium_rectale|t__SGB4933	0.0254754	112	112_107	Bacteria	Firmicutes_A	Clostridia	Lachnospirales	Lachnospiraceae	Agathobacter	rectalis	Group_112
s_9002000001271522_22.strict	98.71	0	0	2549282	34793	kSGB_4933	Species	k__Bacteria|p__Firmicutes|c__Clostridia|o__Clostridiales|f__Lachnospiraceae|g__Lachnospiraceae_unclassified|s__Eubacterium_rectale|t__SGB4933	0.0259427	112	112_106	Bacteria	Firmicutes_A	Clostridia	Lachnospirales	Lachnospiraceae	Agathobacter	rectalis	Group_112
s_9002000001288940_37.strict	91.22	0	0	2117915	16628	kSGB_4933	Species	k__Bacteria|p__Firmicutes|c__Clostridia|o__Clostridiales|f__Lachnospiraceae|g__Lachnospiraceae_unclassified|s__Eubacterium_rectale|t__SGB4933	0.0264155	112	112_105	Bacteria	Firmicutes_A	Clostridia	Lachnospirales	Lachnospiraceae	Agathobacter	rectalis	Group_112
s_9002000001445318_16.permissive	98.79	0	0	2805585	63861	kSGB_4933	Species	k__Bacteria|p__Firmicutes|c__Clostridia|o__Clostridiales|f__Lachnospiraceae|g__Lachnospiraceae_unclassified|s__Eubacterium_rectale|t__SGB4933	0.027213	112	112_104	Bacteria	Firmicutes_A	Clostridia	Lachnospirales	Lachnospiraceae	Agathobacter	rectalis	Group_112
s_9002000001394602_5.strict	96.81	0	0	2368327	22394	kSGB_4933	Species	k__Bacteria|p__Firmicutes|c__Clostridia|o__Clostridiales|f__Lachnospiraceae|g__Lachnospiraceae_unclassified|s__Eubacterium_rectale|t__SGB4933	0.0251264	112	112_103	Bacteria	Firmicutes_A	Clostridia	Lachnospirales	Lachnospiraceae	Agathobacter	rectalis	Group_112
s_9002000001474580_1.orig	97.16	0.19	0	2327248	26932	kSGB_4933	Species	k__Bacteria|p__Firmicutes|c__Clostridia|o__Clostridiales|f__Lachnospiraceae|g__Lachnospiraceae_unclassified|s__Eubacterium_rectale|t__SGB4933	0.025411	112	112_102	Bacteria	Firmicutes_A	Clostridia	Lachnospirales	Lachnospiraceae	Agathobacter	rectalis	Group_112
s_9002000001267207_6.strict	90.46	0	0	2202861	30411	kSGB_4933	Species	k__Bacteria|p__Firmicutes|c__Clostridia|o__Clostridiales|f__Lachnospiraceae|g__Lachnospiraceae_unclassified|s__Eubacterium_rectale|t__SGB4933	0.0251394	112	112_101	Bacteria	Firmicutes_A	Clostridia	Lachnospirales	Lachnospiraceae	Agathobacter	rectalis	Group_112
s_9002000001421399_1.strict	93.59	0.24	100	2221320	19992	kSGB_4933	Species	k__Bacteria|p__Firmicutes|c__Clostridia|o__Clostridiales|f__Lachnospiraceae|g__Lachnospiraceae_unclassified|s__Eubacterium_rectale|t__SGB4933	0.0258179	112	112_100	Bacteria	Firmicutes_A	Clostridia	Lachnospirales	Lachnospiraceae	Agathobacter	rectalis	Group_112
s_9002000001584779_3.strict	93.86	1.69	25	2071727	13324	kSGB_4933	Species	k__Bacteria|p__Firmicutes|c__Clostridia|o__Clostridiales|f__Lachnospiraceae|g__Lachnospiraceae_unclassified|s__Eubacterium_rectale|t__SGB4933	0.0289674	112	112_10	Bacteria	Firmicutes_A	Clostridia	Lachnospirales	Lachnospiraceae	Agathobacter	rectalis	Group_112
s_9002000001214947_25.permissive	96.98	0	0	2160109	30105	kSGB_4933	Species	k__Bacteria|p__Firmicutes|c__Clostridia|o__Clostridiales|f__Lachnospiraceae|g__Lachnospiraceae_unclassified|s__Eubacterium_rectale|t__SGB4933	0.0285394	112	112_1	Bacteria	Firmicutes_A	Clostridia	Lachnospirales	Lachnospiraceae	Agathobacter	rectalis	Group_112
s_9002000001206711LL_34.strict	92.27	1.45	0	2646724	34620	uSGB_4914	Other	k__Bacteria|p__Firmicutes|c__CFGB1451|o__OFGB1451|f__FGB1451|g__GGB3628|s__GGB3628_SGB4914|t__SGB4914	0.0207037	113	113_1	Bacteria	Firmicutes_A	Clostridia	Lachnospirales	Lachnospiraceae	Acetatifactor	sp900066565	Group_113
s_9002000001307240_26.permissive	99.52	1.61	0	3240273	47893	uSGB_4914	Other	k__Bacteria|p__Firmicutes|c__CFGB1451|o__OFGB1451|f__FGB1451|g__GGB3628|s__GGB3628_SGB4914|t__SGB4914	0.0208284	113	113_4	Bacteria	Firmicutes_A	Clostridia	Lachnospirales	Lachnospiraceae	Acetatifactor	sp900066565	Group_113
s_9002000001338480_24.permissive	92.79	4.15	6.67	2573982	18787	uSGB_4914	Other	k__Bacteria|p__Firmicutes|c__CFGB1451|o__OFGB1451|f__FGB1451|g__GGB3628|s__GGB3628_SGB4914|t__SGB4914	0.0212034	113	113_3	Bacteria	Firmicutes_A	Clostridia	Lachnospirales	Lachnospiraceae	Acetatifactor	sp900066565	Group_113
s_9002000001388285_6.permissive	93.42	1.93	16.67	3132296	46350	uSGB_4914	Other	k__Bacteria|p__Firmicutes|c__CFGB1451|o__OFGB1451|f__FGB1451|g__GGB3628|s__GGB3628_SGB4914|t__SGB4914	0.0203291	113	113_2	Bacteria	Firmicutes_A	Clostridia	Lachnospirales	Lachnospiraceae	Acetatifactor	sp900066565	Group_113
s_9002000001249076_14.strict	94.89	0.97	0	2712579	42971	uSGB_4910	Other	k__Bacteria|p__Firmicutes|c__CFGB1451|o__OFGB1451|f__FGB1451|g__GGB3628|s__GGB3628_SGB4910|t__SGB4910	0.0227858	114	114_1	Bacteria	Firmicutes_A	Clostridia	Lachnospirales	Lachnospiraceae	Acetatifactor	intestinalis	Group_114
s_9002000001277357_24.permissive	94.69	0.97	0	2689958	67554	uSGB_4910	Other	k__Bacteria|p__Firmicutes|c__CFGB1451|o__OFGB1451|f__FGB1451|g__GGB3628|s__GGB3628_SGB4910|t__SGB4910	0.0238798	114	114_2	Bacteria	Firmicutes_A	Clostridia	Lachnospirales	Lachnospiraceae	Acetatifactor	intestinalis	Group_114
s_9002000001203943_22.strict	99.52	1.93	16.67	3197647	61955	uSGB_4909	Other	k__Bacteria|p__Firmicutes|c__CFGB1451|o__OFGB1451|f__FGB1451|g__GGB3628|s__GGB3628_SGB4909|t__SGB4909	0.0284265	115	115_1	Bacteria	Firmicutes_A	Clostridia	Lachnospirales	Lachnospiraceae	Acetatifactor	sp003447295	Group_115
s_9002000001444393_19.permissive	94.5	2.42	25	2644032	23799	uSGB_4909	Other	k__Bacteria|p__Firmicutes|c__CFGB1451|o__OFGB1451|f__FGB1451|g__GGB3628|s__GGB3628_SGB4909|t__SGB4909	0.0261844	115	115_2	Bacteria	Firmicutes_A	Clostridia	Lachnospirales	Lachnospiraceae	Acetatifactor	sp003447295	Group_115
s_9002000001475747_11.strict	94.18	0.77	50	2530859	34636	uSGB_4993	Other	k__Bacteria|p__Firmicutes|c__CFGB1464|o__OFGB1464|f__FGB1464|g__GGB3679|s__GGB3679_SGB4993|t__SGB4993	0.0221668	116	116_0	Bacteria	Firmicutes_A	Clostridia	Lachnospirales	Lachnospiraceae	Eisenbergiella	sp900066775	Group_116
s_9002000001479951_4.permissive	95.65	2.03	0	2955026	45919	uSGB_4894	Other	k__Bacteria|p__Firmicutes|c__CFGB1451|o__OFGB1451|f__FGB1451|g__GGB3619|s__GGB3619_SGB4894|t__SGB4894	0.0236001	117	117_0	Bacteria	Firmicutes_A	Clostridia	Lachnospirales	Lachnospiraceae	CAG-95	sp000438155	Group_117
s_9002000001262004_5.strict	96.62	0.67	0	2172726	30191	kSGB_4547	Species	k__Bacteria|p__Firmicutes|c__Clostridia|o__Clostridiales|f__Lachnospiraceae|g__Anaerostipes|s__Anaerostipes_hadrus|t__SGB4547	0.0209303	118	118_2	Bacteria	Firmicutes_A	Clostridia	Lachnospirales	Lachnospiraceae	Anaerostipes	hadrus_A	Group_118
s_9002000001276538_24.strict	92.95	0.67	0	1916874	13531	kSGB_4547	Species	k__Bacteria|p__Firmicutes|c__Clostridia|o__Clostridiales|f__Lachnospiraceae|g__Anaerostipes|s__Anaerostipes_hadrus|t__SGB4547	0.0194582	118	118_2	Bacteria	Firmicutes_A	Clostridia	Lachnospirales	Lachnospiraceae	Anaerostipes	hadrus_A	Group_118
s_9002000001341467_17.strict	93.96	1.34	0	2033651	34662	kSGB_4547	Species	k__Bacteria|p__Firmicutes|c__Clostridia|o__Clostridiales|f__Lachnospiraceae|g__Anaerostipes|s__Anaerostipes_hadrus|t__SGB4547	0.0188023	118	118_1	Bacteria	Firmicutes_A	Clostridia	Lachnospirales	Lachnospiraceae	Anaerostipes	hadrus_A	Group_118
s_9002000001360100_5.permissive	92.49	1.57	0	2119833	20156	kSGB_4547	Species	k__Bacteria|p__Firmicutes|c__Clostridia|o__Clostridiales|f__Lachnospiraceae|g__Anaerostipes|s__Anaerostipes_hadrus|t__SGB4547	0.0226668	118	118_1	Bacteria	Firmicutes_A	Clostridia	Lachnospirales	Lachnospiraceae	Anaerostipes	hadrus_A	Group_118
s_9002000001445318_14.permissive	91.11	0.78	0	1975741	18202	kSGB_4547	Species	k__Bacteria|p__Firmicutes|c__Clostridia|o__Clostridiales|f__Lachnospiraceae|g__Anaerostipes|s__Anaerostipes_hadrus|t__SGB4547	0.0191459	118	118_3	Bacteria	Firmicutes_A	Clostridia	Lachnospirales	Lachnospiraceae	Anaerostipes	hadrus_A	Group_118
s_9002000001497216_35.permissive	95.94	2.01	0	2115083	48533	kSGB_4547	Species	k__Bacteria|p__Firmicutes|c__Clostridia|o__Clostridiales|f__Lachnospiraceae|g__Anaerostipes|s__Anaerostipes_hadrus|t__SGB4547	0.0192571	118	118_1	Bacteria	Firmicutes_A	Clostridia	Lachnospirales	Lachnospiraceae	Anaerostipes	hadrus_A	Group_118
s_9002000001514308_40.permissive	96.79	1.34	0	2266334	42160	kSGB_4547	Species	k__Bacteria|p__Firmicutes|c__Clostridia|o__Clostridiales|f__Lachnospiraceae|g__Anaerostipes|s__Anaerostipes_hadrus|t__SGB4547	0.0202646	118	118_2	Bacteria	Firmicutes_A	Clostridia	Lachnospirales	Lachnospiraceae	Anaerostipes	hadrus_A	Group_118
s_9002000001172687_11.strict	97.63	2.01	0	2235621	28321	kSGB_4540	Species	k__Bacteria|p__Firmicutes|c__Clostridia|o__Clostridiales|f__Lachnospiraceae|g__Anaerostipes|s__Anaerostipes_hadrus|t__SGB4540	0.0237618	119	119_28	Bacteria	Firmicutes_A	Clostridia	Lachnospirales	Lachnospiraceae	Anaerostipes	hadrus	Group_119
s_9002000001184329_6.permissive	91.15	1.34	0	1869927	14867	kSGB_4540	Species	k__Bacteria|p__Firmicutes|c__Clostridia|o__Clostridiales|f__Lachnospiraceae|g__Anaerostipes|s__Anaerostipes_hadrus|t__SGB4540	0.025966	119	119_31	Bacteria	Firmicutes_A	Clostridia	Lachnospirales	Lachnospiraceae	Anaerostipes	hadrus	Group_119
s_9002000001187760_20.strict	94.3	0	0	2373008	62974	kSGB_4540	Species	k__Bacteria|p__Firmicutes|c__Clostridia|o__Clostridiales|f__Lachnospiraceae|g__Anaerostipes|s__Anaerostipes_hadrus|t__SGB4540	0.025736	119	119_23	Bacteria	Firmicutes_A	Clostridia	Lachnospirales	Lachnospiraceae	Anaerostipes	hadrus	Group_119
s_9002000001202875_34.strict	97.28	3.15	18.18	2066519	15484	kSGB_4540	Species	k__Bacteria|p__Firmicutes|c__Clostridia|o__Clostridiales|f__Lachnospiraceae|g__Anaerostipes|s__Anaerostipes_hadrus|t__SGB4540	0.0241915	119	119_12	Bacteria	Firmicutes_A	Clostridia	Lachnospirales	Lachnospiraceae	Anaerostipes	hadrus	Group_119
s_9002000001228076LL_22.permissive	98.32	2.01	0	2383597	30188	kSGB_4540	Species	k__Bacteria|p__Firmicutes|c__Clostridia|o__Clostridiales|f__Lachnospiraceae|g__Anaerostipes|s__Anaerostipes_hadrus|t__SGB4540	0.0245796	119	119_19	Bacteria	Firmicutes_A	Clostridia	Lachnospirales	Lachnospiraceae	Anaerostipes	hadrus	Group_119
s_9002000001234064_11.strict	99.33	1.34	0	2582151	34003	kSGB_4540	Species	k__Bacteria|p__Firmicutes|c__Clostridia|o__Clostridiales|f__Lachnospiraceae|g__Anaerostipes|s__Anaerostipes_hadrus|t__SGB4540	0.0260083	119	119_11	Bacteria	Firmicutes_A	Clostridia	Lachnospirales	Lachnospiraceae	Anaerostipes	hadrus	Group_119
s_9002000001243214_6.permissive	95.64	2.01	0	2111754	12782	kSGB_4540	Species	k__Bacteria|p__Firmicutes|c__Clostridia|o__Clostridiales|f__Lachnospiraceae|g__Anaerostipes|s__Anaerostipes_hadrus|t__SGB4540	0.024324	119	119_27	Bacteria	Firmicutes_A	Clostridia	Lachnospirales	Lachnospiraceae	Anaerostipes	hadrus	Group_119
s_9002000001246252_4.orig	96.98	1.34	50	2094025	13015	kSGB_4540	Species	k__Bacteria|p__Firmicutes|c__Clostridia|o__Clostridiales|f__Lachnospiraceae|g__Anaerostipes|s__Anaerostipes_hadrus|t__SGB4540	0.023361	119	119_5	Bacteria	Firmicutes_A	Clostridia	Lachnospirales	Lachnospiraceae	Anaerostipes	hadrus	Group_119
s_9002000001264644_15.strict	93.96	2.01	0	2287601	30538	kSGB_4540	Species	k__Bacteria|p__Firmicutes|c__Clostridia|o__Clostridiales|f__Lachnospiraceae|g__Anaerostipes|s__Anaerostipes_hadrus|t__SGB4540	0.0236359	119	119_15	Bacteria	Firmicutes_A	Clostridia	Lachnospirales	Lachnospiraceae	Anaerostipes	hadrus	Group_119
s_9002000001265472_43.permissive	97.32	2.01	0	2348181	40557	kSGB_4540	Species	k__Bacteria|p__Firmicutes|c__Clostridia|o__Clostridiales|f__Lachnospiraceae|g__Anaerostipes|s__Anaerostipes_hadrus|t__SGB4540	0.0246183	119	119_7	Bacteria	Firmicutes_A	Clostridia	Lachnospirales	Lachnospiraceae	Anaerostipes	hadrus	Group_119
s_9002000001270534_9.permissive	91.39	2.35	0	1845983	10794	kSGB_4540	Species	k__Bacteria|p__Firmicutes|c__Clostridia|o__Clostridiales|f__Lachnospiraceae|g__Anaerostipes|s__Anaerostipes_hadrus|t__SGB4540	0.0252045	119	119_29	Bacteria	Firmicutes_A	Clostridia	Lachnospirales	Lachnospiraceae	Anaerostipes	hadrus	Group_119
s_9002000001271970_15.strict	97.32	0	0	2264605	18910	kSGB_4540	Species	k__Bacteria|p__Firmicutes|c__Clostridia|o__Clostridiales|f__Lachnospiraceae|g__Anaerostipes|s__Anaerostipes_hadrus|t__SGB4540	0.0244861	119	119_39	Bacteria	Firmicutes_A	Clostridia	Lachnospirales	Lachnospiraceae	Anaerostipes	hadrus	Group_119
s_9002000001288940_36.strict	97.99	2.68	0	2304052	25628	kSGB_4540	Species	k__Bacteria|p__Firmicutes|c__Clostridia|o__Clostridiales|f__Lachnospiraceae|g__Anaerostipes|s__Anaerostipes_hadrus|t__SGB4540	0.0230258	119	119_13	Bacteria	Firmicutes_A	Clostridia	Lachnospirales	Lachnospiraceae	Anaerostipes	hadrus	Group_119
s_9002000001296209_32.permissive	94.3	2.01	0	2046729	21760	kSGB_4540	Species	k__Bacteria|p__Firmicutes|c__Clostridia|o__Clostridiales|f__Lachnospiraceae|g__Anaerostipes|s__Anaerostipes_hadrus|t__SGB4540	0.0242316	119	119_28	Bacteria	Firmicutes_A	Clostridia	Lachnospirales	Lachnospiraceae	Anaerostipes	hadrus	Group_119
s_9002000001300660_1.strict	96.31	1.34	0	2341088	19996	kSGB_4540	Species	k__Bacteria|p__Firmicutes|c__Clostridia|o__Clostridiales|f__Lachnospiraceae|g__Anaerostipes|s__Anaerostipes_hadrus|t__SGB4540	0.0239756	119	119_3	Bacteria	Firmicutes_A	Clostridia	Lachnospirales	Lachnospiraceae	Anaerostipes	hadrus	Group_119
s_9002000001304042_5.strict	97.65	1.34	0	2276609	35180	kSGB_4540	Species	k__Bacteria|p__Firmicutes|c__Clostridia|o__Clostridiales|f__Lachnospiraceae|g__Anaerostipes|s__Anaerostipes_hadrus|t__SGB4540	0.0234103	119	119_36	Bacteria	Firmicutes_A	Clostridia	Lachnospirales	Lachnospiraceae	Anaerostipes	hadrus	Group_119
s_9002000001310371LL_13.permissive	97.99	2.01	0	2412859	35830	kSGB_4540	Species	k__Bacteria|p__Firmicutes|c__Clostridia|o__Clostridiales|f__Lachnospiraceae|g__Anaerostipes|s__Anaerostipes_hadrus|t__SGB4540	0.023558	119	119_12	Bacteria	Firmicutes_A	Clostridia	Lachnospirales	Lachnospiraceae	Anaerostipes	hadrus	Group_119
s_9002000001351641_9.permissive	94.97	0.67	0	2266481	13166	kSGB_4540	Species	k__Bacteria|p__Firmicutes|c__Clostridia|o__Clostridiales|f__Lachnospiraceae|g__Anaerostipes|s__Anaerostipes_hadrus|t__SGB4540	0.024895	119	119_40	Bacteria	Firmicutes_A	Clostridia	Lachnospirales	Lachnospiraceae	Anaerostipes	hadrus	Group_119
s_9002000001361192_18.strict	99.33	2.01	0	2399249	23922	kSGB_4540	Species	k__Bacteria|p__Firmicutes|c__Clostridia|o__Clostridiales|f__Lachnospiraceae|g__Anaerostipes|s__Anaerostipes_hadrus|t__SGB4540	0.0234704	119	119_21	Bacteria	Firmicutes_A	Clostridia	Lachnospirales	Lachnospiraceae	Anaerostipes	hadrus	Group_119
s_9002000001374735_25.orig	96.55	2.68	0	2554843	37602	kSGB_4540	Species	k__Bacteria|p__Firmicutes|c__Clostridia|o__Clostridiales|f__Lachnospiraceae|g__Anaerostipes|s__Anaerostipes_hadrus|t__SGB4540	0.0250301	119	119_6	Bacteria	Firmicutes_A	Clostridia	Lachnospirales	Lachnospiraceae	Anaerostipes	hadrus	Group_119
s_9002000001379150_9.strict	97.18	0.67	0	2237881	25634	kSGB_4540	Species	k__Bacteria|p__Firmicutes|c__Clostridia|o__Clostridiales|f__Lachnospiraceae|g__Anaerostipes|s__Anaerostipes_hadrus|t__SGB4540	0.0246206	119	119_16	Bacteria	Firmicutes_A	Clostridia	Lachnospirales	Lachnospiraceae	Anaerostipes	hadrus	Group_119
s_9002000001380545_10.orig	99.33	1.34	0	2724579	60498	kSGB_4540	Species	k__Bacteria|p__Firmicutes|c__Clostridia|o__Clostridiales|f__Lachnospiraceae|g__Anaerostipes|s__Anaerostipes_hadrus|t__SGB4540	0.0254576	119	119_32	Bacteria	Firmicutes_A	Clostridia	Lachnospirales	Lachnospiraceae	Anaerostipes	hadrus	Group_119
s_9002000001387200_28.permissive	97.32	1.34	0	2236601	17623	kSGB_4540	Species	k__Bacteria|p__Firmicutes|c__Clostridia|o__Clostridiales|f__Lachnospiraceae|g__Anaerostipes|s__Anaerostipes_hadrus|t__SGB4540	0.0237634	119	119_4	Bacteria	Firmicutes_A	Clostridia	Lachnospirales	Lachnospiraceae	Anaerostipes	hadrus	Group_119
s_9002000001390280_35.orig	98.32	1.34	0	2373270	22084	kSGB_4540	Species	k__Bacteria|p__Firmicutes|c__Clostridia|o__Clostridiales|f__Lachnospiraceae|g__Anaerostipes|s__Anaerostipes_hadrus|t__SGB4540	0.0235115	119	119_37	Bacteria	Firmicutes_A	Clostridia	Lachnospirales	Lachnospiraceae	Anaerostipes	hadrus	Group_119
s_9002000001393703_40.permissive	97.99	0.67	0	2275474	24093	kSGB_4540	Species	k__Bacteria|p__Firmicutes|c__Clostridia|o__Clostridiales|f__Lachnospiraceae|g__Anaerostipes|s__Anaerostipes_hadrus|t__SGB4540	0.0236883	119	119_34	Bacteria	Firmicutes_A	Clostridia	Lachnospirales	Lachnospiraceae	Anaerostipes	hadrus	Group_119
s_9002000001394021_8.strict	99.33	2.68	0	2478887	20234	kSGB_4540	Species	k__Bacteria|p__Firmicutes|c__Clostridia|o__Clostridiales|f__Lachnospiraceae|g__Anaerostipes|s__Anaerostipes_hadrus|t__SGB4540	0.0240974	119	119_14	Bacteria	Firmicutes_A	Clostridia	Lachnospirales	Lachnospiraceae	Anaerostipes	hadrus	Group_119
s_9002000001398120_11.permissive	96.98	2.68	0	2305929	23788	kSGB_4540	Species	k__Bacteria|p__Firmicutes|c__Clostridia|o__Clostridiales|f__Lachnospiraceae|g__Anaerostipes|s__Anaerostipes_hadrus|t__SGB4540	0.0237607	119	119_12	Bacteria	Firmicutes_A	Clostridia	Lachnospirales	Lachnospiraceae	Anaerostipes	hadrus	Group_119
s_9002000001400933_4.permissive	94.36	2.01	0	2287233	17609	kSGB_4547	Species	k__Bacteria|p__Firmicutes|c__Clostridia|o__Clostridiales|f__Lachnospiraceae|g__Anaerostipes|s__Anaerostipes_hadrus|t__SGB4547	0.0931844	119	119_10	Bacteria	Firmicutes_A	Clostridia	Lachnospirales	Lachnospiraceae	Anaerostipes	hadrus	Group_119
s_9002000001401313_31.strict	92.9	2.01	0	2103826	14394	kSGB_4540	Species	k__Bacteria|p__Firmicutes|c__Clostridia|o__Clostridiales|f__Lachnospiraceae|g__Anaerostipes|s__Anaerostipes_hadrus|t__SGB4540	0.0244712	119	119_17	Bacteria	Firmicutes_A	Clostridia	Lachnospirales	Lachnospiraceae	Anaerostipes	hadrus	Group_119
s_9002000001401430_3.permissive	93.78	0.67	0	2246887	19922	kSGB_4540	Species	k__Bacteria|p__Firmicutes|c__Clostridia|o__Clostridiales|f__Lachnospiraceae|g__Anaerostipes|s__Anaerostipes_hadrus|t__SGB4540	0.0245456	119	119_22	Bacteria	Firmicutes_A	Clostridia	Lachnospirales	Lachnospiraceae	Anaerostipes	hadrus	Group_119
s_9002000001406680_19.strict	97.32	1.34	0	2384237	49151	kSGB_4540	Species	k__Bacteria|p__Firmicutes|c__Clostridia|o__Clostridiales|f__Lachnospiraceae|g__Anaerostipes|s__Anaerostipes_hadrus|t__SGB4540	0.0247502	119	119_35	Bacteria	Firmicutes_A	Clostridia	Lachnospirales	Lachnospiraceae	Anaerostipes	hadrus	Group_119
s_9002000001414420_2.orig	97.32	0.67	0	2468962	26563	kSGB_4540	Species	k__Bacteria|p__Firmicutes|c__Clostridia|o__Clostridiales|f__Lachnospiraceae|g__Anaerostipes|s__Anaerostipes_hadrus|t__SGB4540	0.024818	119	119_24	Bacteria	Firmicutes_A	Clostridia	Lachnospirales	Lachnospiraceae	Anaerostipes	hadrus	Group_119
s_9002000001424425_10.permissive	97.32	2.68	0	2550960	45148	kSGB_4540	Species	k__Bacteria|p__Firmicutes|c__Clostridia|o__Clostridiales|f__Lachnospiraceae|g__Anaerostipes|s__Anaerostipes_hadrus|t__SGB4540	0.0237784	119	119_33	Bacteria	Firmicutes_A	Clostridia	Lachnospirales	Lachnospiraceae	Anaerostipes	hadrus	Group_119
s_9002000001425146_35.orig	95.64	2.01	0	2052022	18096	kSGB_4540	Species	k__Bacteria|p__Firmicutes|c__Clostridia|o__Clostridiales|f__Lachnospiraceae|g__Anaerostipes|s__Anaerostipes_hadrus|t__SGB4540	0.0234048	119	119_25	Bacteria	Firmicutes_A	Clostridia	Lachnospirales	Lachnospiraceae	Anaerostipes	hadrus	Group_119
s_9002000001428569_22.permissive	96.06	2.68	25	2349384	22859	kSGB_4540	Species	k__Bacteria|p__Firmicutes|c__Clostridia|o__Clostridiales|f__Lachnospiraceae|g__Anaerostipes|s__Anaerostipes_hadrus|t__SGB4540	0.0241317	119	119_26	Bacteria	Firmicutes_A	Clostridia	Lachnospirales	Lachnospiraceae	Anaerostipes	hadrus	Group_119
s_9002000001438180_8.permissive	95.97	1.51	10	2223008	9449	kSGB_4540	Species	k__Bacteria|p__Firmicutes|c__Clostridia|o__Clostridiales|f__Lachnospiraceae|g__Anaerostipes|s__Anaerostipes_hadrus|t__SGB4540	0.0256202	119	119_2	Bacteria	Firmicutes_A	Clostridia	Lachnospirales	Lachnospiraceae	Anaerostipes	hadrus	Group_119
s_9002000001445425_27.permissive	90.54	1.68	33.33	1965132	12461	kSGB_4540	Species	k__Bacteria|p__Firmicutes|c__Clostridia|o__Clostridiales|f__Lachnospiraceae|g__Anaerostipes|s__Anaerostipes_hadrus|t__SGB4540	0.0251162	119	119_18	Bacteria	Firmicutes_A	Clostridia	Lachnospirales	Lachnospiraceae	Anaerostipes	hadrus	Group_119
s_9002000001454080_14.permissive	93.63	0.67	0	1953111	14264	kSGB_4540	Species	k__Bacteria|p__Firmicutes|c__Clostridia|o__Clostridiales|f__Lachnospiraceae|g__Anaerostipes|s__Anaerostipes_hadrus|t__SGB4540	0.0245309	119	119_30	Bacteria	Firmicutes_A	Clostridia	Lachnospirales	Lachnospiraceae	Anaerostipes	hadrus	Group_119
s_9002000001455931_26.strict	94.97	2.68	0	1997340	13753	kSGB_4540	Species	k__Bacteria|p__Firmicutes|c__Clostridia|o__Clostridiales|f__Lachnospiraceae|g__Anaerostipes|s__Anaerostipes_hadrus|t__SGB4540	0.0234631	119	119_8	Bacteria	Firmicutes_A	Clostridia	Lachnospirales	Lachnospiraceae	Anaerostipes	hadrus	Group_119
s_9002000001479951_3.permissive	99.33	2.01	0	2504285	42734	kSGB_4540	Species	k__Bacteria|p__Firmicutes|c__Clostridia|o__Clostridiales|f__Lachnospiraceae|g__Anaerostipes|s__Anaerostipes_hadrus|t__SGB4540	0.0243477	119	119_1	Bacteria	Firmicutes_A	Clostridia	Lachnospirales	Lachnospiraceae	Anaerostipes	hadrus	Group_119
s_9002000001484586_2.strict	98.99	1.34	0	2460504	32439	kSGB_4540	Species	k__Bacteria|p__Firmicutes|c__Clostridia|o__Clostridiales|f__Lachnospiraceae|g__Anaerostipes|s__Anaerostipes_hadrus|t__SGB4540	0.02495	119	119_23	Bacteria	Firmicutes_A	Clostridia	Lachnospirales	Lachnospiraceae	Anaerostipes	hadrus	Group_119
s_9002000001492917_21.permissive	93.62	2.57	0	2206763	11830	kSGB_4540	Species	k__Bacteria|p__Firmicutes|c__Clostridia|o__Clostridiales|f__Lachnospiraceae|g__Anaerostipes|s__Anaerostipes_hadrus|t__SGB4540	0.0258267	119	119_41	Bacteria	Firmicutes_A	Clostridia	Lachnospirales	Lachnospiraceae	Anaerostipes	hadrus	Group_119
s_9002000001501005_7.permissive	95.81	1.34	0	2215673	24488	kSGB_4540	Species	k__Bacteria|p__Firmicutes|c__Clostridia|o__Clostridiales|f__Lachnospiraceae|g__Anaerostipes|s__Anaerostipes_hadrus|t__SGB4540	0.0244756	119	119_1	Bacteria	Firmicutes_A	Clostridia	Lachnospirales	Lachnospiraceae	Anaerostipes	hadrus	Group_119
s_9002000001552710_5.strict	98.23	1.34	0	2354571	30662	kSGB_4540	Species	k__Bacteria|p__Firmicutes|c__Clostridia|o__Clostridiales|f__Lachnospiraceae|g__Anaerostipes|s__Anaerostipes_hadrus|t__SGB4540	0.02395	119	119_38	Bacteria	Firmicutes_A	Clostridia	Lachnospirales	Lachnospiraceae	Anaerostipes	hadrus	Group_119
s_9002000001554377_31.permissive	94.36	3.36	0	2223442	20649	kSGB_4540	Species	k__Bacteria|p__Firmicutes|c__Clostridia|o__Clostridiales|f__Lachnospiraceae|g__Anaerostipes|s__Anaerostipes_hadrus|t__SGB4540	0.0236338	119	119_12	Bacteria	Firmicutes_A	Clostridia	Lachnospirales	Lachnospiraceae	Anaerostipes	hadrus	Group_119
s_9002000001580090_28.orig	95.94	2.01	0	2129250	13474	kSGB_4540	Species	k__Bacteria|p__Firmicutes|c__Clostridia|o__Clostridiales|f__Lachnospiraceae|g__Anaerostipes|s__Anaerostipes_hadrus|t__SGB4540	0.0229279	119	119_9	Bacteria	Firmicutes_A	Clostridia	Lachnospirales	Lachnospiraceae	Anaerostipes	hadrus	Group_119
s_9002000001589560_12.strict	96.09	2.01	0	2070272	18013	kSGB_4547	Species	k__Bacteria|p__Firmicutes|c__Clostridia|o__Clostridiales|f__Lachnospiraceae|g__Anaerostipes|s__Anaerostipes_hadrus|t__SGB4547	0.0919597	119	119_20	Bacteria	Firmicutes_A	Clostridia	Lachnospirales	Lachnospiraceae	Anaerostipes	hadrus	Group_119
s_9002000001589917_21.permissive	90.72	1.34	0	2231506	12518	kSGB_4540	Species	k__Bacteria|p__Firmicutes|c__Clostridia|o__Clostridiales|f__Lachnospiraceae|g__Anaerostipes|s__Anaerostipes_hadrus|t__SGB4540	0.0374742	119	119_42	Bacteria	Firmicutes_A	Clostridia	Lachnospirales	Lachnospiraceae	Anaerostipes	hadrus	Group_119
s_9002000001244042_19.permissive	97.47	0	0	2369778	55704	kSGB_4608	Species	k__Bacteria|p__Firmicutes|c__Clostridia|o__Clostridiales|f__Lachnospiraceae|g__Blautia|s__Ruminococcus_torques|t__SGB4608	0.00995377	120	120_1	Bacteria	Firmicutes_A	Clostridia	Lachnospirales	Lachnospiraceae	Mediterraneibacter	torques	Group_120
s_9002000001406700_17.strict	97.08	0	0	2308343	47280	kSGB_4608	Species	k__Bacteria|p__Firmicutes|c__Clostridia|o__Clostridiales|f__Lachnospiraceae|g__Blautia|s__Ruminococcus_torques|t__SGB4608	0.008842	120	120_1	Bacteria	Firmicutes_A	Clostridia	Lachnospirales	Lachnospiraceae	Mediterraneibacter	torques	Group_120
s_9002000001456330_14.strict	90.64	0.19	0	2307630	46770	kSGB_4608	Species	k__Bacteria|p__Firmicutes|c__Clostridia|o__Clostridiales|f__Lachnospiraceae|g__Blautia|s__Ruminococcus_torques|t__SGB4608	0.011162	120	120_1	Bacteria	Firmicutes_A	Clostridia	Lachnospirales	Lachnospiraceae	Mediterraneibacter	torques	Group_120
s_9002000001475747_26.permissive	96.12	0	0	2172296	25996	kSGB_4608	Species	k__Bacteria|p__Firmicutes|c__Clostridia|o__Clostridiales|f__Lachnospiraceae|g__Blautia|s__Ruminococcus_torques|t__SGB4608	0.00915804	120	120_1	Bacteria	Firmicutes_A	Clostridia	Lachnospirales	Lachnospiraceae	Mediterraneibacter	torques	Group_120
s_9002000001504132_23.strict	97.86	0	0	2432999	39285	kSGB_4608	Species	k__Bacteria|p__Firmicutes|c__Clostridia|o__Clostridiales|f__Lachnospiraceae|g__Blautia|s__Ruminococcus_torques|t__SGB4608	0.010798	120	120_1	Bacteria	Firmicutes_A	Clostridia	Lachnospirales	Lachnospiraceae	Mediterraneibacter	torques	Group_120
s_9002000001554377_29.permissive	96.78	0	0	2388748	92139	kSGB_4608	Species	k__Bacteria|p__Firmicutes|c__Clostridia|o__Clostridiales|f__Lachnospiraceae|g__Blautia|s__Ruminococcus_torques|t__SGB4608	0.0106508	120	120_1	Bacteria	Firmicutes_A	Clostridia	Lachnospirales	Lachnospiraceae	Mediterraneibacter	torques	Group_120
s_9002000001584779_23.permissive	98.25	0	0	2513673	47086	kSGB_4608	Species	k__Bacteria|p__Firmicutes|c__Clostridia|o__Clostridiales|f__Lachnospiraceae|g__Blautia|s__Ruminococcus_torques|t__SGB4608	0.010778	120	120_1	Bacteria	Firmicutes_A	Clostridia	Lachnospirales	Lachnospiraceae	Mediterraneibacter	torques	Group_120
s_9002000001244042_44.permissive	94.63	1.9	0	3610062	19085	kSGB_4532	Species	k__Bacteria|p__Firmicutes|c__Clostridia|o__Clostridiales|f__Lachnospiraceae|g__Anaerobutyricum|s__Anaerobutyricum_hallii|t__SGB4532	0.0278851	121	121_1	Bacteria	Firmicutes_A	Clostridia	Lachnospirales	Lachnospiraceae	Anaerobutyricum	hallii	Group_121
s_9002000001244089LL_19.strict	95.97	0.67	0	3241676	17075	kSGB_4532	Species	k__Bacteria|p__Firmicutes|c__Clostridia|o__Clostridiales|f__Lachnospiraceae|g__Anaerobutyricum|s__Anaerobutyricum_hallii|t__SGB4532	0.0260312	121	121_1	Bacteria	Firmicutes_A	Clostridia	Lachnospirales	Lachnospiraceae	Anaerobutyricum	hallii	Group_121
s_9002000001248749_8.permissive	93.29	2.01	0	2878300	20039	kSGB_4532	Species	k__Bacteria|p__Firmicutes|c__Clostridia|o__Clostridiales|f__Lachnospiraceae|g__Anaerobutyricum|s__Anaerobutyricum_hallii|t__SGB4532	0.0255244	121	121_2	Bacteria	Firmicutes_A	Clostridia	Lachnospirales	Lachnospiraceae	Anaerobutyricum	hallii	Group_121
s_9002000001252044_9.strict	92.62	1.34	0	2941960	17595	kSGB_4532	Species	k__Bacteria|p__Firmicutes|c__Clostridia|o__Clostridiales|f__Lachnospiraceae|g__Anaerobutyricum|s__Anaerobutyricum_hallii|t__SGB4532	0.026811	121	121_3	Bacteria	Firmicutes_A	Clostridia	Lachnospirales	Lachnospiraceae	Anaerobutyricum	hallii	Group_121
s_9002000001259288_29.strict	96.2	0.67	0	2691722	14393	kSGB_4532	Species	k__Bacteria|p__Firmicutes|c__Clostridia|o__Clostridiales|f__Lachnospiraceae|g__Anaerobutyricum|s__Anaerobutyricum_hallii|t__SGB4532	0.0251886	121	121_6	Bacteria	Firmicutes_A	Clostridia	Lachnospirales	Lachnospiraceae	Anaerobutyricum	hallii	Group_121
s_9002000001271522_23.strict	93.29	2.68	0	3589517	12713	kSGB_4532	Species	k__Bacteria|p__Firmicutes|c__Clostridia|o__Clostridiales|f__Lachnospiraceae|g__Anaerobutyricum|s__Anaerobutyricum_hallii|t__SGB4532	0.0373954	121	121_13	Bacteria	Firmicutes_A	Clostridia	Lachnospirales	Lachnospiraceae	Anaerobutyricum	hallii	Group_121
s_9002000001272430_19.strict	95.64	0.67	0	3051521	12994	kSGB_4532	Species	k__Bacteria|p__Firmicutes|c__Clostridia|o__Clostridiales|f__Lachnospiraceae|g__Anaerobutyricum|s__Anaerobutyricum_hallii|t__SGB4532	0.0247402	121	121_4	Bacteria	Firmicutes_A	Clostridia	Lachnospirales	Lachnospiraceae	Anaerobutyricum	hallii	Group_121
s_9002000001276538_32.orig	97.76	0.67	0	3256213	19934	kSGB_4532	Species	k__Bacteria|p__Firmicutes|c__Clostridia|o__Clostridiales|f__Lachnospiraceae|g__Anaerobutyricum|s__Anaerobutyricum_hallii|t__SGB4532	0.0261846	121	121_1	Bacteria	Firmicutes_A	Clostridia	Lachnospirales	Lachnospiraceae	Anaerobutyricum	hallii	Group_121
s_9002000001294380_34.strict	96.64	2.91	0	3439698	25639	kSGB_4532	Species	k__Bacteria|p__Firmicutes|c__Clostridia|o__Clostridiales|f__Lachnospiraceae|g__Anaerobutyricum|s__Anaerobutyricum_hallii|t__SGB4532	0.0279159	121	121_7	Bacteria	Firmicutes_A	Clostridia	Lachnospirales	Lachnospiraceae	Anaerobutyricum	hallii	Group_121
s_9002000001304042_37.strict	91.28	0.67	0	3467815	28444	kSGB_4532	Species	k__Bacteria|p__Firmicutes|c__Clostridia|o__Clostridiales|f__Lachnospiraceae|g__Anaerobutyricum|s__Anaerobutyricum_hallii|t__SGB4532	0.031171	121	121_12	Bacteria	Firmicutes_A	Clostridia	Lachnospirales	Lachnospiraceae	Anaerobutyricum	hallii	Group_121
s_9002000001317659_21.orig	93.4	1.34	0	3051542	15219	kSGB_4532	Species	k__Bacteria|p__Firmicutes|c__Clostridia|o__Clostridiales|f__Lachnospiraceae|g__Anaerobutyricum|s__Anaerobutyricum_hallii|t__SGB4532	0.0254531	121	121_5	Bacteria	Firmicutes_A	Clostridia	Lachnospirales	Lachnospiraceae	Anaerobutyricum	hallii	Group_121
s_9002000001391709_10.permissive	91.95	0.89	0	2852877	11061	kSGB_4532	Species	k__Bacteria|p__Firmicutes|c__Clostridia|o__Clostridiales|f__Lachnospiraceae|g__Anaerobutyricum|s__Anaerobutyricum_hallii|t__SGB4532	0.0274982	121	121_1	Bacteria	Firmicutes_A	Clostridia	Lachnospirales	Lachnospiraceae	Anaerobutyricum	hallii	Group_121
s_9002000001406680_18.orig	94.63	1.51	0	3203178	22499	kSGB_4532	Species	k__Bacteria|p__Firmicutes|c__Clostridia|o__Clostridiales|f__Lachnospiraceae|g__Anaerobutyricum|s__Anaerobutyricum_hallii|t__SGB4532	0.0268982	121	121_8	Bacteria	Firmicutes_A	Clostridia	Lachnospirales	Lachnospiraceae	Anaerobutyricum	hallii	Group_121
s_9002000001425146_34.strict	93.96	2.01	0	3000160	16948	kSGB_4532	Species	k__Bacteria|p__Firmicutes|c__Clostridia|o__Clostridiales|f__Lachnospiraceae|g__Anaerobutyricum|s__Anaerobutyricum_hallii|t__SGB4532	0.0258526	121	121_10	Bacteria	Firmicutes_A	Clostridia	Lachnospirales	Lachnospiraceae	Anaerobutyricum	hallii	Group_121
s_9002000001527262_20.strict	93.29	1.48	0	3157541	11822	kSGB_4532	Species	k__Bacteria|p__Firmicutes|c__Clostridia|o__Clostridiales|f__Lachnospiraceae|g__Anaerobutyricum|s__Anaerobutyricum_hallii|t__SGB4532	0.0292028	121	121_11	Bacteria	Firmicutes_A	Clostridia	Lachnospirales	Lachnospiraceae	Anaerobutyricum	hallii	Group_121
s_9002000001537510_4.orig	90.49	2.16	18.18	3111019	11017	kSGB_4532	Species	k__Bacteria|p__Firmicutes|c__Clostridia|o__Clostridiales|f__Lachnospiraceae|g__Anaerobutyricum|s__Anaerobutyricum_hallii|t__SGB4532	0.0282823	121	121_1	Bacteria	Firmicutes_A	Clostridia	Lachnospirales	Lachnospiraceae	Anaerobutyricum	hallii	Group_121
s_9002000001543510_25.permissive	91.95	1.34	50	2864776	29089	kSGB_4532	Species	k__Bacteria|p__Firmicutes|c__Clostridia|o__Clostridiales|f__Lachnospiraceae|g__Anaerobutyricum|s__Anaerobutyricum_hallii|t__SGB4532	0.0245532	121	121_9	Bacteria	Firmicutes_A	Clostridia	Lachnospirales	Lachnospiraceae	Anaerobutyricum	hallii	Group_121
s_9002000001178386_18.strict	97.97	0.32	0	2831104	60760	kSGB_4826	Species	k__Bacteria|p__Firmicutes|c__Clostridia|o__Clostridiales|f__Lachnospiraceae|g__Blautia|s__Blautia_sp_KLE_1732|t__SGB4826	0.023443	122	122_6	Bacteria	Firmicutes_A	Clostridia	Lachnospirales	Lachnospiraceae	Blautia_A	massiliensis	Group_122
s_9002000001227892_7.strict	92.25	0.21	0	2515979	42055	kSGB_4826	Species	k__Bacteria|p__Firmicutes|c__Clostridia|o__Clostridiales|f__Lachnospiraceae|g__Blautia|s__Blautia_sp_KLE_1732|t__SGB4826	0.0240922	122	122_1	Bacteria	Firmicutes_A	Clostridia	Lachnospirales	Lachnospiraceae	Blautia_A	massiliensis	Group_122
s_9002000001428569_20.permissive	93.78	0.32	0	2656724	75988	kSGB_4826	Species	k__Bacteria|p__Firmicutes|c__Clostridia|o__Clostridiales|f__Lachnospiraceae|g__Blautia|s__Blautia_sp_KLE_1732|t__SGB4826	0.0228926	122	122_3	Bacteria	Firmicutes_A	Clostridia	Lachnospirales	Lachnospiraceae	Blautia_A	massiliensis	Group_122
s_9002000001446502_5.permissive	96.73	0.32	0	2790096	49372	kSGB_4826	Species	k__Bacteria|p__Firmicutes|c__Clostridia|o__Clostridiales|f__Lachnospiraceae|g__Blautia|s__Blautia_sp_KLE_1732|t__SGB4826	0.0227247	122	122_2	Bacteria	Firmicutes_A	Clostridia	Lachnospirales	Lachnospiraceae	Blautia_A	massiliensis	Group_122
s_9002000001498948_14.permissive	97.93	0.32	0	2746223	49319	kSGB_4826	Species	k__Bacteria|p__Firmicutes|c__Clostridia|o__Clostridiales|f__Lachnospiraceae|g__Blautia|s__Blautia_sp_KLE_1732|t__SGB4826	0.0224775	122	122_5	Bacteria	Firmicutes_A	Clostridia	Lachnospirales	Lachnospiraceae	Blautia_A	massiliensis	Group_122
s_9002000001531363_15.strict	91.27	1.9	20	2453147	48196	kSGB_4826	Species	k__Bacteria|p__Firmicutes|c__Clostridia|o__Clostridiales|f__Lachnospiraceae|g__Blautia|s__Blautia_sp_KLE_1732|t__SGB4826	0.0236033	122	122_4	Bacteria	Firmicutes_A	Clostridia	Lachnospirales	Lachnospiraceae	Blautia_A	massiliensis	Group_122
s_9002000001296209_20.permissive	98.84	0.32	0	3109478	62483	uSGB_4828	Genus	k__Bacteria|p__Firmicutes|c__Clostridia|o__Clostridiales|f__Lachnospiraceae|g__Blautia|s__Blautia_SGB4828|t__SGB4828	0.021939	123	123_0	Bacteria	Firmicutes_A	Clostridia	Lachnospirales	Lachnospiraceae	Blautia_A	sp900066335	Group_123
s_9002000001393561_15.strict	97.78	0.84	33.33	3102961	57396	uSGB_4824	Genus	k__Bacteria|p__Firmicutes|c__Clostridia|o__Clostridiales|f__Lachnospiraceae|g__Blautia|s__Blautia_SGB4824|t__SGB4824	0.0216971	124	124_0	Bacteria	Firmicutes_A	Clostridia	Lachnospirales	Lachnospiraceae	Blautia_A	sp003474435	Group_124
s_9002000001294380_29.permissive	97.34	0	0	2715329	47956	kSGB_4811	Species	k__Bacteria|p__Firmicutes|c__Clostridia|o__Clostridiales|f__Lachnospiraceae|g__Blautia|s__Blautia_obeum|t__SGB4811	0.0265033	125	125_1	Bacteria	Firmicutes_A	Clostridia	Lachnospirales	Lachnospiraceae	Blautia_A	obeum	Group_125
s_9002000001305350_12.permissive	90.83	3.24	22.22	2925412	21334	kSGB_4811	Species	k__Bacteria|p__Firmicutes|c__Clostridia|o__Clostridiales|f__Lachnospiraceae|g__Blautia|s__Blautia_obeum|t__SGB4811	0.0340073	125	125_3	Bacteria	Firmicutes_A	Clostridia	Lachnospirales	Lachnospiraceae	Blautia_A	obeum	Group_125
s_9002000001412522_17.strict	95.91	0.63	50	2864070	52473	kSGB_4811	Species	k__Bacteria|p__Firmicutes|c__Clostridia|o__Clostridiales|f__Lachnospiraceae|g__Blautia|s__Blautia_obeum|t__SGB4811	0.027946	125	125_2	Bacteria	Firmicutes_A	Clostridia	Lachnospirales	Lachnospiraceae	Blautia_A	obeum	Group_125
s_9002000001202507_10.strict	96.1	0	0	2964465	23652	kSGB_4844	Species	k__Bacteria|p__Firmicutes|c__Clostridia|o__Clostridiales|f__Lachnospiraceae|g__Blautia|s__Blautia_obeum|t__SGB4844	0.0289057	126	126_7	Bacteria	Firmicutes_A	Clostridia	Lachnospirales	Lachnospiraceae	Blautia_A	wexlerae	Group_126
s_9002000001206711LL_29.strict	91.71	3.16	42.86	2727525	33730	kSGB_4844	Species	k__Bacteria|p__Firmicutes|c__Clostridia|o__Clostridiales|f__Lachnospiraceae|g__Blautia|s__Blautia_obeum|t__SGB4844	0.0321269	126	126_21	Bacteria	Firmicutes_A	Clostridia	Lachnospirales	Lachnospiraceae	Blautia_A	wexlerae	Group_126
s_9002000001208627_21.strict	90.76	1.58	0	2637919	15653	kSGB_4844	Species	k__Bacteria|p__Firmicutes|c__Clostridia|o__Clostridiales|f__Lachnospiraceae|g__Blautia|s__Blautia_obeum|t__SGB4844	0.0307739	126	126_3	Bacteria	Firmicutes_A	Clostridia	Lachnospirales	Lachnospiraceae	Blautia_A	wexlerae	Group_126
s_9002000001227239_4.permissive	90.66	0	0	2779252	35122	kSGB_4844	Species	k__Bacteria|p__Firmicutes|c__Clostridia|o__Clostridiales|f__Lachnospiraceae|g__Blautia|s__Blautia_obeum|t__SGB4844	0.0304551	126	126_1	Bacteria	Firmicutes_A	Clostridia	Lachnospirales	Lachnospiraceae	Blautia_A	wexlerae	Group_126
s_9002000001228076LL_31.strict	92.37	0	0	3264723	72111	kSGB_4844	Species	k__Bacteria|p__Firmicutes|c__Clostridia|o__Clostridiales|f__Lachnospiraceae|g__Blautia|s__Blautia_obeum|t__SGB4844	0.029718	126	126_26	Bacteria	Firmicutes_A	Clostridia	Lachnospirales	Lachnospiraceae	Blautia_A	wexlerae	Group_126
s_9002000001228512_31.permissive	96.26	0	0	3072039	36720	kSGB_4844	Species	k__Bacteria|p__Firmicutes|c__Clostridia|o__Clostridiales|f__Lachnospiraceae|g__Blautia|s__Blautia_obeum|t__SGB4844	0.0290814	126	126_13	Bacteria	Firmicutes_A	Clostridia	Lachnospirales	Lachnospiraceae	Blautia_A	wexlerae	Group_126
s_9002000001232275_10.strict	92.21	0	0	2972201	18339	kSGB_4844	Species	k__Bacteria|p__Firmicutes|c__Clostridia|o__Clostridiales|f__Lachnospiraceae|g__Blautia|s__Blautia_obeum|t__SGB4844	0.0313321	126	126_28	Bacteria	Firmicutes_A	Clostridia	Lachnospirales	Lachnospiraceae	Blautia_A	wexlerae	Group_126
s_9002000001250148_14.strict	93.6	1.27	0	3137310	30882	kSGB_4844	Species	k__Bacteria|p__Firmicutes|c__Clostridia|o__Clostridiales|f__Lachnospiraceae|g__Blautia|s__Blautia_obeum|t__SGB4844	0.029102	126	126_15	Bacteria	Firmicutes_A	Clostridia	Lachnospirales	Lachnospiraceae	Blautia_A	wexlerae	Group_126
s_9002000001264644_1.orig	94.19	0	0	2734757	16256	kSGB_4844	Species	k__Bacteria|p__Firmicutes|c__Clostridia|o__Clostridiales|f__Lachnospiraceae|g__Blautia|s__Blautia_obeum|t__SGB4844	0.0269055	126	126_17	Bacteria	Firmicutes_A	Clostridia	Lachnospirales	Lachnospiraceae	Blautia_A	wexlerae	Group_126
s_9002000001267207_23.strict	93.91	0	0	2833894	21757	kSGB_4844	Species	k__Bacteria|p__Firmicutes|c__Clostridia|o__Clostridiales|f__Lachnospiraceae|g__Blautia|s__Blautia_obeum|t__SGB4844	0.0290541	126	126_14	Bacteria	Firmicutes_A	Clostridia	Lachnospirales	Lachnospiraceae	Blautia_A	wexlerae	Group_126
s_9002000001274506_25.orig	93.22	0.06	100	2690574	11736	uSGB_4849	Genus	k__Bacteria|p__Firmicutes|c__Clostridia|o__Clostridiales|f__Lachnospiraceae|g__Blautia|s__Blautia_SGB4849|t__SGB4849	0.043179	126	126_9	Bacteria	Firmicutes_A	Clostridia	Lachnospirales	Lachnospiraceae	Blautia_A	wexlerae	Group_126
s_9002000001294380_32.permissive	95.79	2.53	14.29	2982088	35013	kSGB_4844	Species	k__Bacteria|p__Firmicutes|c__Clostridia|o__Clostridiales|f__Lachnospiraceae|g__Blautia|s__Blautia_obeum|t__SGB4844	0.030667	126	126_27	Bacteria	Firmicutes_A	Clostridia	Lachnospirales	Lachnospiraceae	Blautia_A	wexlerae	Group_126
s_9002000001321910_22.strict	95.77	0	0	3117505	26812	uSGB_4854	Genus	k__Bacteria|p__Firmicutes|c__Clostridia|o__Clostridiales|f__Lachnospiraceae|g__Blautia|s__Blautia_SGB4854|t__SGB4854	0.0441707	126	126_20	Bacteria	Firmicutes_A	Clostridia	Lachnospirales	Lachnospiraceae	Blautia_A	wexlerae	Group_126
s_9002000001328080LL_15.permissive	94.95	0.63	0	2737648	22439	kSGB_4844	Species	k__Bacteria|p__Firmicutes|c__Clostridia|o__Clostridiales|f__Lachnospiraceae|g__Blautia|s__Blautia_obeum|t__SGB4844	0.0310201	126	126_4	Bacteria	Firmicutes_A	Clostridia	Lachnospirales	Lachnospiraceae	Blautia_A	wexlerae	Group_126
s_9002000001338013_32.strict	92.76	0	0	2721891	28240	kSGB_4844	Species	k__Bacteria|p__Firmicutes|c__Clostridia|o__Clostridiales|f__Lachnospiraceae|g__Blautia|s__Blautia_obeum|t__SGB4844	0.0298001	126	126_5	Bacteria	Firmicutes_A	Clostridia	Lachnospirales	Lachnospiraceae	Blautia_A	wexlerae	Group_126
s_9002000001346540_16.strict	95.09	0	0	3115449	35216	kSGB_4844	Species	k__Bacteria|p__Firmicutes|c__Clostridia|o__Clostridiales|f__Lachnospiraceae|g__Blautia|s__Blautia_obeum|t__SGB4844	0.0307786	126	126_29	Bacteria	Firmicutes_A	Clostridia	Lachnospirales	Lachnospiraceae	Blautia_A	wexlerae	Group_126
s_9002000001373308_21.permissive	90.85	2.4	50	2697543	13677	kSGB_4844	Species	k__Bacteria|p__Firmicutes|c__Clostridia|o__Clostridiales|f__Lachnospiraceae|g__Blautia|s__Blautia_obeum|t__SGB4844	0.0324069	126	126_18	Bacteria	Firmicutes_A	Clostridia	Lachnospirales	Lachnospiraceae	Blautia_A	wexlerae	Group_126
s_9002000001390345_8.strict	93.08	0	0	3034984	37279	kSGB_4844	Species	k__Bacteria|p__Firmicutes|c__Clostridia|o__Clostridiales|f__Lachnospiraceae|g__Blautia|s__Blautia_obeum|t__SGB4844	0.0314262	126	126_2	Bacteria	Firmicutes_A	Clostridia	Lachnospirales	Lachnospiraceae	Blautia_A	wexlerae	Group_126
s_9002000001394021_31.strict	97.47	0.08	50	3327187	58881	kSGB_4844	Species	k__Bacteria|p__Firmicutes|c__Clostridia|o__Clostridiales|f__Lachnospiraceae|g__Blautia|s__Blautia_obeum|t__SGB4844	0.0294612	126	126_23	Bacteria	Firmicutes_A	Clostridia	Lachnospirales	Lachnospiraceae	Blautia_A	wexlerae	Group_126
s_9002000001412522_16.strict	90.69	0	0	2859088	43191	kSGB_4844	Species	k__Bacteria|p__Firmicutes|c__Clostridia|o__Clostridiales|f__Lachnospiraceae|g__Blautia|s__Blautia_obeum|t__SGB4844	0.0302626	126	126_24	Bacteria	Firmicutes_A	Clostridia	Lachnospirales	Lachnospiraceae	Blautia_A	wexlerae	Group_126
s_9002000001428569_21.strict	90.58	0.84	100	2601801	25598	kSGB_4844	Species	k__Bacteria|p__Firmicutes|c__Clostridia|o__Clostridiales|f__Lachnospiraceae|g__Blautia|s__Blautia_obeum|t__SGB4844	0.0291503	126	126_11	Bacteria	Firmicutes_A	Clostridia	Lachnospirales	Lachnospiraceae	Blautia_A	wexlerae	Group_126
s_9002000001443799LL_8.permissive	97.88	0	0	3177970	36250	kSGB_4844	Species	k__Bacteria|p__Firmicutes|c__Clostridia|o__Clostridiales|f__Lachnospiraceae|g__Blautia|s__Blautia_obeum|t__SGB4844	0.0285411	126	126_16	Bacteria	Firmicutes_A	Clostridia	Lachnospirales	Lachnospiraceae	Blautia_A	wexlerae	Group_126
s_9002000001454470_15.strict	95.84	0	0	3082527	31031	kSGB_4844	Species	k__Bacteria|p__Firmicutes|c__Clostridia|o__Clostridiales|f__Lachnospiraceae|g__Blautia|s__Blautia_obeum|t__SGB4844	0.029997	126	126_12	Bacteria	Firmicutes_A	Clostridia	Lachnospirales	Lachnospiraceae	Blautia_A	wexlerae	Group_126
s_9002000001475747_33.permissive	97.98	0	0	3197393	51429	uSGB_4855	Genus	k__Bacteria|p__Firmicutes|c__Clostridia|o__Clostridiales|f__Lachnospiraceae|g__Blautia|s__Blautia_SGB4855|t__SGB4855	0.0453226	126	126_30	Bacteria	Firmicutes_A	Clostridia	Lachnospirales	Lachnospiraceae	Blautia_A	wexlerae	Group_126
s_9002000001504132_20.permissive	98.1	0	0	3483339	72790	kSGB_4844	Species	k__Bacteria|p__Firmicutes|c__Clostridia|o__Clostridiales|f__Lachnospiraceae|g__Blautia|s__Blautia_obeum|t__SGB4844	0.0292458	126	126_8	Bacteria	Firmicutes_A	Clostridia	Lachnospirales	Lachnospiraceae	Blautia_A	wexlerae	Group_126
s_9002000001514308_29.strict	92.81	0	0	2566610	36149	kSGB_4844	Species	k__Bacteria|p__Firmicutes|c__Clostridia|o__Clostridiales|f__Lachnospiraceae|g__Blautia|s__Blautia_obeum|t__SGB4844	0.0286496	126	126_10	Bacteria	Firmicutes_A	Clostridia	Lachnospirales	Lachnospiraceae	Blautia_A	wexlerae	Group_126
s_9002000001527647_7.strict	96.2	1.69	33.33	3400507	56936	kSGB_4844	Species	k__Bacteria|p__Firmicutes|c__Clostridia|o__Clostridiales|f__Lachnospiraceae|g__Blautia|s__Blautia_obeum|t__SGB4844	0.0309212	126	126_25	Bacteria	Firmicutes_A	Clostridia	Lachnospirales	Lachnospiraceae	Blautia_A	wexlerae	Group_126
s_9002000001531940_5.orig	97.47	0	0	3091036	28366	kSGB_4844	Species	k__Bacteria|p__Firmicutes|c__Clostridia|o__Clostridiales|f__Lachnospiraceae|g__Blautia|s__Blautia_obeum|t__SGB4844	0.0280002	126	126_6	Bacteria	Firmicutes_A	Clostridia	Lachnospirales	Lachnospiraceae	Blautia_A	wexlerae	Group_126
s_9002000001552710_12.strict	92.48	1.27	0	2432315	25659	kSGB_4844	Species	k__Bacteria|p__Firmicutes|c__Clostridia|o__Clostridiales|f__Lachnospiraceae|g__Blautia|s__Blautia_obeum|t__SGB4844	0.0318711	126	126_19	Bacteria	Firmicutes_A	Clostridia	Lachnospirales	Lachnospiraceae	Blautia_A	wexlerae	Group_126
s_9002000001554439_25.permissive	93.16	1.9	50	2836600	25319	kSGB_4844	Species	k__Bacteria|p__Firmicutes|c__Clostridia|o__Clostridiales|f__Lachnospiraceae|g__Blautia|s__Blautia_obeum|t__SGB4844	0.0305364	126	126_8	Bacteria	Firmicutes_A	Clostridia	Lachnospirales	Lachnospiraceae	Blautia_A	wexlerae	Group_126
s_9002000001558115_10.permissive	90.96	1.42	36.36	2906140	20407	kSGB_4844	Species	k__Bacteria|p__Firmicutes|c__Clostridia|o__Clostridiales|f__Lachnospiraceae|g__Blautia|s__Blautia_obeum|t__SGB4844	0.0306338	126	126_22	Bacteria	Firmicutes_A	Clostridia	Lachnospirales	Lachnospiraceae	Blautia_A	wexlerae	Group_126
s_2009000001589950_27.permissive	90.81	2.07	22.22	3348259	21051	kSGB_4820	Species	k__Bacteria|p__Firmicutes|c__Clostridia|o__Clostridiales|f__Lachnospiraceae|g__Blautia|s__Ruminococcus_torques|t__SGB4820	0.0328972	127	127_0	Bacteria	Firmicutes_A	Clostridia	Lachnospirales	Lachnospiraceae	Blautia_A	faecis	Group_127
s_9002000001227810_3.strict	95.38	0.85	0	2713938	22871	uSGB_4788	Family	k__Bacteria|p__Firmicutes|c__Clostridia|o__Clostridiales|f__Lachnospiraceae|g__GGB3578|s__GGB3578_SGB4788|t__SGB4788	0.0268983	128	128_0	Bacteria	Firmicutes_A	Clostridia	Lachnospirales	Lachnospiraceae	Blautia	stercoris	Group_128
s_9002000001184329_14.strict	90.74	0.63	0	2729547	29767	uSGB_4862	Family	k__Bacteria|p__Firmicutes|c__Clostridia|o__Clostridiales|f__Lachnospiraceae|g__GGB3601|s__GGB3601_SGB4862|t__SGB4862	0.0300076	129	129_0	Bacteria	Firmicutes_A	Clostridia	Lachnospirales	Lachnospiraceae	Blautia_A	caecimuris	Group_129
s_9002000001312311_16.strict	97.41	2.75	27.27	2248562	40181	uSGB_4964	Family	k__Bacteria|p__Firmicutes|c__Clostridia|o__Clostridiales|f__Eubacteriaceae|g__GGB3653|s__GGB3653_SGB4964|t__SGB4964	0.0210363	130	130_1	Bacteria	Firmicutes_A	Clostridia	Lachnospirales	Lachnospiraceae	UBA11774	sp003507655	Group_130
s_9002000001388285_11.permissive	96.13	4.39	0	2093980	30592	uSGB_4964	Family	k__Bacteria|p__Firmicutes|c__Clostridia|o__Clostridiales|f__Eubacteriaceae|g__GGB3653|s__GGB3653_SGB4964|t__SGB4964	0.0207015	130	130_2	Bacteria	Firmicutes_A	Clostridia	Lachnospirales	Lachnospiraceae	UBA11774	sp003507655	Group_130
s_9002000001418974_30.strict	92.74	0.31	0	1800203	14667	uSGB_4899	Other	k__Bacteria|p__Firmicutes|c__CFGB1451|o__OFGB1451|f__FGB1451|g__GGB3622|s__GGB3622_SGB4899|t__SGB4899	0.204974	131	131_0	Bacteria	Firmicutes_A	Clostridia	Lachnospirales	Lachnospiraceae	UBA11774		Group_131
s_9002000001222690_8.strict	92.55	0.58	0	2140480	37469	kSGB_4581	Species	k__Bacteria|p__Firmicutes|c__Clostridia|o__Clostridiales|f__Lachnospiraceae|g__Dorea|s__Dorea_longicatena|t__SGB4581	0.0200851	132	132_3	Bacteria	Firmicutes_A	Clostridia	Lachnospirales	Lachnospiraceae	Dorea_A	longicatena	Group_132
s_9002000001392617_14.permissive	90.25	1.56	0	2001102	19020	kSGB_4581	Species	k__Bacteria|p__Firmicutes|c__Clostridia|o__Clostridiales|f__Lachnospiraceae|g__Dorea|s__Dorea_longicatena|t__SGB4581	0.0207637	132	132_6	Bacteria	Firmicutes_A	Clostridia	Lachnospirales	Lachnospiraceae	Dorea_A	longicatena	Group_132
s_9002000001403309_42.strict	97.53	0	0	2377301	62087	kSGB_4581	Species	k__Bacteria|p__Firmicutes|c__Clostridia|o__Clostridiales|f__Lachnospiraceae|g__Dorea|s__Dorea_longicatena|t__SGB4581	0.0201161	132	132_2	Bacteria	Firmicutes_A	Clostridia	Lachnospirales	Lachnospiraceae	Dorea_A	longicatena	Group_132
s_9002000001421030_7.permissive	94.15	1.17	0	2619468	32505	kSGB_4581	Species	k__Bacteria|p__Firmicutes|c__Clostridia|o__Clostridiales|f__Lachnospiraceae|g__Dorea|s__Dorea_longicatena|t__SGB4581	0.02306	132	132_5	Bacteria	Firmicutes_A	Clostridia	Lachnospirales	Lachnospiraceae	Dorea_A	longicatena	Group_132
s_9002000001425146_1.permissive	95.79	0	0	2273841	34294	kSGB_4581	Species	k__Bacteria|p__Firmicutes|c__Clostridia|o__Clostridiales|f__Lachnospiraceae|g__Dorea|s__Dorea_longicatena|t__SGB4581	0.019247	132	132_4	Bacteria	Firmicutes_A	Clostridia	Lachnospirales	Lachnospiraceae	Dorea_A	longicatena	Group_132
s_9002000001452386_7.strict	92.07	0.68	0	2263809	27565	kSGB_4581	Species	k__Bacteria|p__Firmicutes|c__Clostridia|o__Clostridiales|f__Lachnospiraceae|g__Dorea|s__Dorea_longicatena|t__SGB4581	0.02008	132	132_2	Bacteria	Firmicutes_A	Clostridia	Lachnospirales	Lachnospiraceae	Dorea_A	longicatena	Group_132
s_9002000001459770_4.permissive	90.39	0.49	100	2186346	19984	kSGB_4581	Species	k__Bacteria|p__Firmicutes|c__Clostridia|o__Clostridiales|f__Lachnospiraceae|g__Dorea|s__Dorea_longicatena|t__SGB4581	0.0208569	132	132_7	Bacteria	Firmicutes_A	Clostridia	Lachnospirales	Lachnospiraceae	Dorea_A	longicatena	Group_132
s_9002000001462284_44.permissive	97.95	0	0	2413422	60330	kSGB_4581	Species	k__Bacteria|p__Firmicutes|c__Clostridia|o__Clostridiales|f__Lachnospiraceae|g__Dorea|s__Dorea_longicatena|t__SGB4581	0.0185694	132	132_1	Bacteria	Firmicutes_A	Clostridia	Lachnospirales	Lachnospiraceae	Dorea_A	longicatena	Group_132
s_9002000001467905_11.permissive	95.91	0	0	2519983	43759	kSGB_4581	Species	k__Bacteria|p__Firmicutes|c__Clostridia|o__Clostridiales|f__Lachnospiraceae|g__Dorea|s__Dorea_longicatena|t__SGB4581	0.0204014	132	132_5	Bacteria	Firmicutes_A	Clostridia	Lachnospirales	Lachnospiraceae	Dorea_A	longicatena	Group_132
s_9002000001476065_10.strict	92.46	0	0	2306439	26361	kSGB_4581	Species	k__Bacteria|p__Firmicutes|c__Clostridia|o__Clostridiales|f__Lachnospiraceae|g__Dorea|s__Dorea_longicatena|t__SGB4581	0.0195293	132	132_1	Bacteria	Firmicutes_A	Clostridia	Lachnospirales	Lachnospiraceae	Dorea_A	longicatena	Group_132
s_9002000001244042_22.orig	96.49	0	0	2892913	53286	kSGB_4584	Species	k__Bacteria|p__Firmicutes|c__Clostridia|o__Clostridiales|f__Lachnospiraceae|g__Blautia|s__Ruminococcus_gnavus|t__SGB4584	0.0234178	133	133_1	Bacteria	Firmicutes_A	Clostridia	Lachnospirales	Lachnospiraceae	Ruminococcus_B	gnavus	Group_133
s_9002000001301926_7.permissive	94	0	0	2726959	46412	kSGB_4584	Species	k__Bacteria|p__Firmicutes|c__Clostridia|o__Clostridiales|f__Lachnospiraceae|g__Blautia|s__Ruminococcus_gnavus|t__SGB4584	0.0220467	133	133_2	Bacteria	Firmicutes_A	Clostridia	Lachnospirales	Lachnospiraceae	Ruminococcus_B	gnavus	Group_133
s_9002000001446502_4.strict	96.59	0.58	0	2543660	67525	kSGB_4932	Species	k__Bacteria|p__Firmicutes|c__Clostridia|o__Clostridiales|f__Lachnospiraceae|g__Blautia|s__Ruminococcus_torques|t__SGB4932	0.0413694	134	134_1	Bacteria	Firmicutes_A	Clostridia	Lachnospirales	Lachnospiraceae	Mediterraneibacter	faecis	Group_134
s_9002000001589560_15.strict	94.93	0	0	2340320	60715	kSGB_4564	Species	k__Bacteria|p__Firmicutes|c__Clostridia|o__Clostridiales|f__Lachnospiraceae|g__Blautia|s__Ruminococcus_torques|t__SGB4564	0.034723	134	134_2	Bacteria	Firmicutes_A	Clostridia	Lachnospirales	Lachnospiraceae	Mediterraneibacter	faecis	Group_134
s_9002000001200638_28.strict	98.66	0	0	2491659	82886	kSGB_5121	Species	k__Bacteria|p__Firmicutes|c__Clostridia|o__Clostridiales|f__Clostridiaceae|g__Clostridium|s__Clostridium_sp_L2_50|t__SGB5121	0.0331518	135	135_1	Bacteria	Firmicutes_A	Clostridia	Lachnospirales	Lachnospiraceae	Coprococcus	sp000154245	Group_135
s_9002000001232570LL_22.strict	97.99	0	0	2505559	106578	kSGB_5121	Species	k__Bacteria|p__Firmicutes|c__Clostridia|o__Clostridiales|f__Clostridiaceae|g__Clostridium|s__Clostridium_sp_L2_50|t__SGB5121	0.0334819	135	135_1	Bacteria	Firmicutes_A	Clostridia	Lachnospirales	Lachnospiraceae	Coprococcus	sp000154245	Group_135
s_9002000001277188LL_30.orig	98.32	0	0	2574638	30406	kSGB_5121	Species	k__Bacteria|p__Firmicutes|c__Clostridia|o__Clostridiales|f__Clostridiaceae|g__Clostridium|s__Clostridium_sp_L2_50|t__SGB5121	0.0286275	135	135_4	Bacteria	Firmicutes_A	Clostridia	Lachnospirales	Lachnospiraceae	Coprococcus	sp000154245	Group_135
s_9002000001322390_21.strict	90.97	0	0	2363935	105292	kSGB_5121	Species	k__Bacteria|p__Firmicutes|c__Clostridia|o__Clostridiales|f__Clostridiaceae|g__Clostridium|s__Clostridium_sp_L2_50|t__SGB5121	0.0337994	135	135_2	Bacteria	Firmicutes_A	Clostridia	Lachnospirales	Lachnospiraceae	Coprococcus	sp000154245	Group_135
s_9002000001359499_15.strict	95.3	0	0	2545882	53965	kSGB_5121	Species	k__Bacteria|p__Firmicutes|c__Clostridia|o__Clostridiales|f__Clostridiaceae|g__Clostridium|s__Clostridium_sp_L2_50|t__SGB5121	0.0347998	135	135_2	Bacteria	Firmicutes_A	Clostridia	Lachnospirales	Lachnospiraceae	Coprococcus	sp000154245	Group_135
s_9002000001394021_37.permissive	94.13	0	0	2491182	34116	kSGB_5121	Species	k__Bacteria|p__Firmicutes|c__Clostridia|o__Clostridiales|f__Clostridiaceae|g__Clostridium|s__Clostridium_sp_L2_50|t__SGB5121	0.029466	135	135_6	Bacteria	Firmicutes_A	Clostridia	Lachnospirales	Lachnospiraceae	Coprococcus	sp000154245	Group_135
s_9002000001407430_26.permissive	92.45	0.34	0	2383190	22134	kSGB_5121	Species	k__Bacteria|p__Firmicutes|c__Clostridia|o__Clostridiales|f__Clostridiaceae|g__Clostridium|s__Clostridium_sp_L2_50|t__SGB5121	0.0350344	135	135_3	Bacteria	Firmicutes_A	Clostridia	Lachnospirales	Lachnospiraceae	Coprococcus	sp000154245	Group_135
s_9002000001439850_18.strict	92.75	0	0	2340503	22919	uSGB_4849	Genus	k__Bacteria|p__Firmicutes|c__Clostridia|o__Clostridiales|f__Lachnospiraceae|g__Blautia|s__Blautia_SGB4849|t__SGB4849	0.219531	135	135_5	Bacteria	Firmicutes_A	Clostridia	Lachnospirales	Lachnospiraceae	Coprococcus	sp000154245	Group_135
s_9005000001577950_45.permissive	93.29	0.22	0	2504145	81132	kSGB_5121	Species	k__Bacteria|p__Firmicutes|c__Clostridia|o__Clostridiales|f__Clostridiaceae|g__Clostridium|s__Clostridium_sp_L2_50|t__SGB5121	0.0283881	135	135_4	Bacteria	Firmicutes_A	Clostridia	Lachnospirales	Lachnospiraceae	Coprococcus	sp000154245	Group_135
s_9002000001552710_14.strict	95.97	0.02	0	2723430	58851	kSGB_5118	Species	k__Bacteria|p__Firmicutes|c__Clostridia|o__Clostridiales|f__Lachnospiraceae|g__Coprococcus|s__Coprococcus_eutactus|t__SGB5118	0.013969	136	136_1	Bacteria	Firmicutes_A	Clostridia	Lachnospirales	Lachnospiraceae	Coprococcus	eutactus	Group_136
s_9002000001570129_2.strict	93.29	0	0	2507139	131626	kSGB_5118	Species	k__Bacteria|p__Firmicutes|c__Clostridia|o__Clostridiales|f__Lachnospiraceae|g__Coprococcus|s__Coprococcus_eutactus|t__SGB5118	0.0182269	136	136_2	Bacteria	Firmicutes_A	Clostridia	Lachnospirales	Lachnospiraceae	Coprococcus	eutactus	Group_136
s_9002000001178386_33.permissive	95.64	0	0	2809801	87477	kSGB_5117	Species	k__Bacteria|p__Firmicutes|c__Clostridia|o__Clostridiales|f__Lachnospiraceae|g__Coprococcus|s__Coprococcus_eutactus|t__SGB5117	0.0168718	137	137_3	Bacteria	Firmicutes_A	Clostridia	Lachnospirales	Lachnospiraceae	Coprococcus	eutactus_A	Group_137
s_9002000001178680_13.strict	99.33	0	0	2741025	73504	kSGB_5117	Species	k__Bacteria|p__Firmicutes|c__Clostridia|o__Clostridiales|f__Lachnospiraceae|g__Coprococcus|s__Coprococcus_eutactus|t__SGB5117	0.0169176	137	137_5	Bacteria	Firmicutes_A	Clostridia	Lachnospirales	Lachnospiraceae	Coprococcus	eutactus_A	Group_137
s_9002000001186403_38.strict	99.33	0	0	2862721	109558	kSGB_5117	Species	k__Bacteria|p__Firmicutes|c__Clostridia|o__Clostridiales|f__Lachnospiraceae|g__Coprococcus|s__Coprococcus_eutactus|t__SGB5117	0.0171293	137	137_15	Bacteria	Firmicutes_A	Clostridia	Lachnospirales	Lachnospiraceae	Coprococcus	eutactus_A	Group_137
s_9002000001206711LL_31.strict	99.33	0.31	0	2883050	134084	kSGB_5117	Species	k__Bacteria|p__Firmicutes|c__Clostridia|o__Clostridiales|f__Lachnospiraceae|g__Coprococcus|s__Coprococcus_eutactus|t__SGB5117	0.0165817	137	137_19	Bacteria	Firmicutes_A	Clostridia	Lachnospirales	Lachnospiraceae	Coprococcus	eutactus_A	Group_137
s_9002000001214562_6.permissive	97.23	0	0	2797772	70799	kSGB_5117	Species	k__Bacteria|p__Firmicutes|c__Clostridia|o__Clostridiales|f__Lachnospiraceae|g__Coprococcus|s__Coprococcus_eutactus|t__SGB5117	0.0161641	137	137_18	Bacteria	Firmicutes_A	Clostridia	Lachnospirales	Lachnospiraceae	Coprococcus	eutactus_A	Group_137
s_9002000001215917_20.strict	96.31	0.67	0	2575707	21844	kSGB_5117	Species	k__Bacteria|p__Firmicutes|c__Clostridia|o__Clostridiales|f__Lachnospiraceae|g__Coprococcus|s__Coprococcus_eutactus|t__SGB5117	0.015937	137	137_8	Bacteria	Firmicutes_A	Clostridia	Lachnospirales	Lachnospiraceae	Coprococcus	eutactus_A	Group_137
s_9002000001227810_40.orig	97.99	0	0	2616735	43972	kSGB_5117	Species	k__Bacteria|p__Firmicutes|c__Clostridia|o__Clostridiales|f__Lachnospiraceae|g__Coprococcus|s__Coprococcus_eutactus|t__SGB5117	0.0158993	137	137_10	Bacteria	Firmicutes_A	Clostridia	Lachnospirales	Lachnospiraceae	Coprococcus	eutactus_A	Group_137
s_9002000001228512_28.strict	97.65	0	0	2782082	152852	kSGB_5117	Species	k__Bacteria|p__Firmicutes|c__Clostridia|o__Clostridiales|f__Lachnospiraceae|g__Coprococcus|s__Coprococcus_eutactus|t__SGB5117	0.0166513	137	137_18	Bacteria	Firmicutes_A	Clostridia	Lachnospirales	Lachnospiraceae	Coprococcus	eutactus_A	Group_137
s_9002000001233610_2.permissive	90.6	0	0	2698463	107382	kSGB_5117	Species	k__Bacteria|p__Firmicutes|c__Clostridia|o__Clostridiales|f__Lachnospiraceae|g__Coprococcus|s__Coprococcus_eutactus|t__SGB5117	0.0185022	137	137_13	Bacteria	Firmicutes_A	Clostridia	Lachnospirales	Lachnospiraceae	Coprococcus	eutactus_A	Group_137
s_9002000001246252_17.permissive	99.33	0	0	2777007	143129	kSGB_5117	Species	k__Bacteria|p__Firmicutes|c__Clostridia|o__Clostridiales|f__Lachnospiraceae|g__Coprococcus|s__Coprococcus_eutactus|t__SGB5117	0.0158961	137	137_8	Bacteria	Firmicutes_A	Clostridia	Lachnospirales	Lachnospiraceae	Coprococcus	eutactus_A	Group_137
s_9002000001249076_15.strict	97.32	0	0	2738712	95968	kSGB_5117	Species	k__Bacteria|p__Firmicutes|c__Clostridia|o__Clostridiales|f__Lachnospiraceae|g__Coprococcus|s__Coprococcus_eutactus|t__SGB5117	0.0162272	137	137_18	Bacteria	Firmicutes_A	Clostridia	Lachnospirales	Lachnospiraceae	Coprococcus	eutactus_A	Group_137
s_9002000001250513_30.strict	98.99	0	0	2707421	92013	kSGB_5117	Species	k__Bacteria|p__Firmicutes|c__Clostridia|o__Clostridiales|f__Lachnospiraceae|g__Coprococcus|s__Coprococcus_eutactus|t__SGB5117	0.0160651	137	137_12	Bacteria	Firmicutes_A	Clostridia	Lachnospirales	Lachnospiraceae	Coprococcus	eutactus_A	Group_137
s_9002000001252044_12.strict	97.65	0	0	2866229	83858	kSGB_5117	Species	k__Bacteria|p__Firmicutes|c__Clostridia|o__Clostridiales|f__Lachnospiraceae|g__Coprococcus|s__Coprococcus_eutactus|t__SGB5117	0.0170197	137	137_10	Bacteria	Firmicutes_A	Clostridia	Lachnospirales	Lachnospiraceae	Coprococcus	eutactus_A	Group_137
s_9002000001261704_8.permissive	92.62	0	0	2549912	124964	kSGB_5117	Species	k__Bacteria|p__Firmicutes|c__Clostridia|o__Clostridiales|f__Lachnospiraceae|g__Coprococcus|s__Coprococcus_eutactus|t__SGB5117	0.0188223	137	137_17	Bacteria	Firmicutes_A	Clostridia	Lachnospirales	Lachnospiraceae	Coprococcus	eutactus_A	Group_137
s_9002000001265472_64.permissive	95.67	0.84	66.67	2566866	31440	kSGB_5117	Species	k__Bacteria|p__Firmicutes|c__Clostridia|o__Clostridiales|f__Lachnospiraceae|g__Coprococcus|s__Coprococcus_eutactus|t__SGB5117	0.0163534	137	137_11	Bacteria	Firmicutes_A	Clostridia	Lachnospirales	Lachnospiraceae	Coprococcus	eutactus_A	Group_137
s_9002000001274506_6.strict	94.97	1.01	50	2621370	34151	kSGB_5117	Species	k__Bacteria|p__Firmicutes|c__Clostridia|o__Clostridiales|f__Lachnospiraceae|g__Coprococcus|s__Coprococcus_eutactus|t__SGB5117	0.0165659	137	137_9	Bacteria	Firmicutes_A	Clostridia	Lachnospirales	Lachnospiraceae	Coprococcus	eutactus_A	Group_137
s_9002000001295079_9.strict	98.79	0	0	2813527	221557	kSGB_5117	Species	k__Bacteria|p__Firmicutes|c__Clostridia|o__Clostridiales|f__Lachnospiraceae|g__Coprococcus|s__Coprococcus_eutactus|t__SGB5117	0.0162815	137	137_21	Bacteria	Firmicutes_A	Clostridia	Lachnospirales	Lachnospiraceae	Coprococcus	eutactus_A	Group_137
s_9002000001295598_23.permissive	98.66	0	0	2821002	108564	kSGB_5117	Species	k__Bacteria|p__Firmicutes|c__Clostridia|o__Clostridiales|f__Lachnospiraceae|g__Coprococcus|s__Coprococcus_eutactus|t__SGB5117	0.0162737	137	137_12	Bacteria	Firmicutes_A	Clostridia	Lachnospirales	Lachnospiraceae	Coprococcus	eutactus_A	Group_137
s_9002000001304937LL_9.orig	91.28	0	0	2541177	20396	kSGB_5117	Species	k__Bacteria|p__Firmicutes|c__Clostridia|o__Clostridiales|f__Lachnospiraceae|g__Coprococcus|s__Coprococcus_eutactus|t__SGB5117	0.0162817	137	137_10	Bacteria	Firmicutes_A	Clostridia	Lachnospirales	Lachnospiraceae	Coprococcus	eutactus_A	Group_137
s_9002000001319297_29.permissive	90.43	0	0	2348314	19334	kSGB_5117	Species	k__Bacteria|p__Firmicutes|c__Clostridia|o__Clostridiales|f__Lachnospiraceae|g__Coprococcus|s__Coprococcus_eutactus|t__SGB5117	0.0175184	137	137_23	Bacteria	Firmicutes_A	Clostridia	Lachnospirales	Lachnospiraceae	Coprococcus	eutactus_A	Group_137
s_9002000001338416_7.strict	98.66	0	0	2768736	140362	kSGB_5117	Species	k__Bacteria|p__Firmicutes|c__Clostridia|o__Clostridiales|f__Lachnospiraceae|g__Coprococcus|s__Coprococcus_eutactus|t__SGB5117	0.0177016	137	137_20	Bacteria	Firmicutes_A	Clostridia	Lachnospirales	Lachnospiraceae	Coprococcus	eutactus_A	Group_137
s_9002000001359499_10.orig	93.62	0.22	0	2626223	41846	kSGB_5117	Species	k__Bacteria|p__Firmicutes|c__Clostridia|o__Clostridiales|f__Lachnospiraceae|g__Coprococcus|s__Coprococcus_eutactus|t__SGB5117	0.0171991	137	137_7	Bacteria	Firmicutes_A	Clostridia	Lachnospirales	Lachnospiraceae	Coprococcus	eutactus_A	Group_137
s_9002000001366180_50.strict	90.6	0	0	2615296	146304	kSGB_5117	Species	k__Bacteria|p__Firmicutes|c__Clostridia|o__Clostridiales|f__Lachnospiraceae|g__Coprococcus|s__Coprococcus_eutactus|t__SGB5117	0.0192008	137	137_16	Bacteria	Firmicutes_A	Clostridia	Lachnospirales	Lachnospiraceae	Coprococcus	eutactus_A	Group_137
s_9002000001391070_3.strict	96.64	0.34	100	2793073	51186	kSGB_5117	Species	k__Bacteria|p__Firmicutes|c__Clostridia|o__Clostridiales|f__Lachnospiraceae|g__Coprococcus|s__Coprococcus_eutactus|t__SGB5117	0.0169086	137	137_10	Bacteria	Firmicutes_A	Clostridia	Lachnospirales	Lachnospiraceae	Coprococcus	eutactus_A	Group_137
s_9002000001391709_28.permissive	95.3	0.22	0	2598785	45072	kSGB_5117	Species	k__Bacteria|p__Firmicutes|c__Clostridia|o__Clostridiales|f__Lachnospiraceae|g__Coprococcus|s__Coprococcus_eutactus|t__SGB5117	0.0158504	137	137_13	Bacteria	Firmicutes_A	Clostridia	Lachnospirales	Lachnospiraceae	Coprococcus	eutactus_A	Group_137
s_9002000001392457_31.permissive	97.99	0	0	2690061	67469	kSGB_5117	Species	k__Bacteria|p__Firmicutes|c__Clostridia|o__Clostridiales|f__Lachnospiraceae|g__Coprococcus|s__Coprococcus_eutactus|t__SGB5117	0.0160742	137	137_17	Bacteria	Firmicutes_A	Clostridia	Lachnospirales	Lachnospiraceae	Coprococcus	eutactus_A	Group_137
s_9002000001393098_1.strict	93.74	0	0	2465646	16699	kSGB_5117	Species	k__Bacteria|p__Firmicutes|c__Clostridia|o__Clostridiales|f__Lachnospiraceae|g__Coprococcus|s__Coprococcus_eutactus|t__SGB5117	0.0164263	137	137_6	Bacteria	Firmicutes_A	Clostridia	Lachnospirales	Lachnospiraceae	Coprococcus	eutactus_A	Group_137
s_9002000001402221_16.strict	97.32	0.22	0	2680375	55664	kSGB_5117	Species	k__Bacteria|p__Firmicutes|c__Clostridia|o__Clostridiales|f__Lachnospiraceae|g__Coprococcus|s__Coprococcus_eutactus|t__SGB5117	0.0166611	137	137_1	Bacteria	Firmicutes_A	Clostridia	Lachnospirales	Lachnospiraceae	Coprococcus	eutactus_A	Group_137
s_9002000001406700_20.permissive	94.63	0	0	2729669	106800	kSGB_5117	Species	k__Bacteria|p__Firmicutes|c__Clostridia|o__Clostridiales|f__Lachnospiraceae|g__Coprococcus|s__Coprococcus_eutactus|t__SGB5117	0.0164434	137	137_8	Bacteria	Firmicutes_A	Clostridia	Lachnospirales	Lachnospiraceae	Coprococcus	eutactus_A	Group_137
s_9002000001407430_16.strict	97.48	0	0	2542202	28352	kSGB_5117	Species	k__Bacteria|p__Firmicutes|c__Clostridia|o__Clostridiales|f__Lachnospiraceae|g__Coprococcus|s__Coprococcus_eutactus|t__SGB5117	0.0169491	137	137_20	Bacteria	Firmicutes_A	Clostridia	Lachnospirales	Lachnospiraceae	Coprococcus	eutactus_A	Group_137
s_9002000001408575_29.strict	96.64	0.24	0	2483067	34805	kSGB_5117	Species	k__Bacteria|p__Firmicutes|c__Clostridia|o__Clostridiales|f__Lachnospiraceae|g__Coprococcus|s__Coprococcus_eutactus|t__SGB5117	0.0179161	137	137_7	Bacteria	Firmicutes_A	Clostridia	Lachnospirales	Lachnospiraceae	Coprococcus	eutactus_A	Group_137
s_9002000001447950_36.strict	96.98	0	0	2856532	120292	kSGB_5117	Species	k__Bacteria|p__Firmicutes|c__Clostridia|o__Clostridiales|f__Lachnospiraceae|g__Coprococcus|s__Coprococcus_eutactus|t__SGB5117	0.0161909	137	137_20	Bacteria	Firmicutes_A	Clostridia	Lachnospirales	Lachnospiraceae	Coprococcus	eutactus_A	Group_137
s_9002000001454910_17.permissive	99.33	0	0	2852682	143027	kSGB_5117	Species	k__Bacteria|p__Firmicutes|c__Clostridia|o__Clostridiales|f__Lachnospiraceae|g__Coprococcus|s__Coprococcus_eutactus|t__SGB5117	0.0169427	137	137_2	Bacteria	Firmicutes_A	Clostridia	Lachnospirales	Lachnospiraceae	Coprococcus	eutactus_A	Group_137
s_9002000001455931_5.permissive	97.32	0	0	2774431	78843	kSGB_5117	Species	k__Bacteria|p__Firmicutes|c__Clostridia|o__Clostridiales|f__Lachnospiraceae|g__Coprococcus|s__Coprococcus_eutactus|t__SGB5117	0.0182549	137	137_24	Bacteria	Firmicutes_A	Clostridia	Lachnospirales	Lachnospiraceae	Coprococcus	eutactus_A	Group_137
s_9002000001463497_30.strict	94.97	0.67	100	2653561	45995	kSGB_5117	Species	k__Bacteria|p__Firmicutes|c__Clostridia|o__Clostridiales|f__Lachnospiraceae|g__Coprococcus|s__Coprococcus_eutactus|t__SGB5117	0.016102	137	137_22	Bacteria	Firmicutes_A	Clostridia	Lachnospirales	Lachnospiraceae	Coprococcus	eutactus_A	Group_137
s_9002000001512770_42.strict	95.67	0	0	2617749	51173	kSGB_5117	Species	k__Bacteria|p__Firmicutes|c__Clostridia|o__Clostridiales|f__Lachnospiraceae|g__Coprococcus|s__Coprococcus_eutactus|t__SGB5117	0.0168814	137	137_4	Bacteria	Firmicutes_A	Clostridia	Lachnospirales	Lachnospiraceae	Coprococcus	eutactus_A	Group_137
s_9002000001537510_13.strict	95.18	0.22	0	2632368	56619	kSGB_5117	Species	k__Bacteria|p__Firmicutes|c__Clostridia|o__Clostridiales|f__Lachnospiraceae|g__Coprococcus|s__Coprococcus_eutactus|t__SGB5117	0.0163777	137	137_7	Bacteria	Firmicutes_A	Clostridia	Lachnospirales	Lachnospiraceae	Coprococcus	eutactus_A	Group_137
s_9002000001543510_24.strict	91.61	0	0	2613650	79848	kSGB_5117	Species	k__Bacteria|p__Firmicutes|c__Clostridia|o__Clostridiales|f__Lachnospiraceae|g__Coprococcus|s__Coprococcus_eutactus|t__SGB5117	0.0167206	137	137_14	Bacteria	Firmicutes_A	Clostridia	Lachnospirales	Lachnospiraceae	Coprococcus	eutactus_A	Group_137
s_9002000001589560_1.permissive	95.64	0.06	0	2568225	23032	kSGB_5117	Species	k__Bacteria|p__Firmicutes|c__Clostridia|o__Clostridiales|f__Lachnospiraceae|g__Coprococcus|s__Coprococcus_eutactus|t__SGB5117	0.016028	137	137_7	Bacteria	Firmicutes_A	Clostridia	Lachnospirales	Lachnospiraceae	Coprococcus	eutactus_A	Group_137
s_9002000001372130_18.permissive	91.5	0	0	2669900	34819	uSGB_5116	Genus	k__Bacteria|p__Firmicutes|c__Clostridia|o__Clostridiales|f__Lachnospiraceae|g__Coprococcus|s__Coprococcus_SGB5116|t__SGB5116	0.0158999	138	138_0	Bacteria	Firmicutes_A	Clostridia	Lachnospirales	Lachnospiraceae	Coprococcus	sp900548215	Group_138
s_2009000001576810_4.permissive	97.99	0.67	0	2577068	60095	uSGB_5111	Family	k__Bacteria|p__Firmicutes|c__Clostridia|o__Clostridiales|f__Lachnospiraceae|g__GGB3757|s__GGB3757_SGB5111|t__SGB5111	0.0168142	139	139_6	Bacteria	Firmicutes_A	Clostridia	Lachnospirales	Lachnospiraceae	CAG-127	sp900319515	Group_139
s_9002000001200638_29.permissive	94.3	0.67	0	2568929	102492	uSGB_5111	Family	k__Bacteria|p__Firmicutes|c__Clostridia|o__Clostridiales|f__Lachnospiraceae|g__GGB3757|s__GGB3757_SGB5111|t__SGB5111	0.0167139	139	139_3	Bacteria	Firmicutes_A	Clostridia	Lachnospirales	Lachnospiraceae	CAG-127	sp900319515	Group_139
s_9002000001307240_22.permissive	91.36	0	0	2401016	46522	uSGB_5111	Family	k__Bacteria|p__Firmicutes|c__Clostridia|o__Clostridiales|f__Lachnospiraceae|g__GGB3757|s__GGB3757_SGB5111|t__SGB5111	0.0168126	139	139_1	Bacteria	Firmicutes_A	Clostridia	Lachnospirales	Lachnospiraceae	CAG-127	sp900319515	Group_139
s_9002000001341467_13.permissive	94.6	0	0	2457870	46426	uSGB_5111	Family	k__Bacteria|p__Firmicutes|c__Clostridia|o__Clostridiales|f__Lachnospiraceae|g__GGB3757|s__GGB3757_SGB5111|t__SGB5111	0.0165279	139	139_4	Bacteria	Firmicutes_A	Clostridia	Lachnospirales	Lachnospiraceae	CAG-127	sp900319515	Group_139
s_9002000001418974_11.orig	96.31	0	0	2573682	58848	uSGB_5111	Family	k__Bacteria|p__Firmicutes|c__Clostridia|o__Clostridiales|f__Lachnospiraceae|g__GGB3757|s__GGB3757_SGB5111|t__SGB5111	0.0166379	139	139_2	Bacteria	Firmicutes_A	Clostridia	Lachnospirales	Lachnospiraceae	CAG-127	sp900319515	Group_139
s_9002000001556980LL_19.strict	93.12	0.67	0	2261576	30669	uSGB_5111	Family	k__Bacteria|p__Firmicutes|c__Clostridia|o__Clostridiales|f__Lachnospiraceae|g__GGB3757|s__GGB3757_SGB5111|t__SGB5111	0.0170723	139	139_5	Bacteria	Firmicutes_A	Clostridia	Lachnospirales	Lachnospiraceae	CAG-127	sp900319515	Group_139
s_9002000001343701_29.strict	99.33	0	0	2293657	89118	uSGB_5115	Family	k__Bacteria|p__Firmicutes|c__Clostridia|o__Clostridiales|f__Lachnospiraceae|g__GGB3758|s__GGB3758_SGB5115|t__SGB5115	0.0151098	140	140_0	Bacteria	Firmicutes_A	Clostridia	Lachnospirales	Lachnospiraceae	Coprococcus	sp000433075	Group_140
s_9002000001280218_6.orig	93.96	0	0	2026817	10495	uSGB_4444	Other	k__Bacteria|p__Firmicutes|c__CFGB1379|o__OFGB1379|f__FGB1379|g__GGB3360|s__GGB3360_SGB4444|t__SGB4444	0.014502	141	141_0	Bacteria	Firmicutes_A	Clostridia	Oscillospirales	Ruminococcaceae	UBA5884	sp018376535	Group_141
s_9002000001280218_21.strict	93.96	0	0	2010604	119101	uSGB_5100	Other	k__Bacteria|p__Firmicutes|c__CFGB1479|o__OFGB1479|f__FGB1479|g__GGB3752|s__GGB3752_SGB5100|t__SGB5100	0.0136022	142	142_0	Bacteria	Firmicutes_A	Clostridia	Lachnospirales	Lachnospiraceae	CAG-632	sp900539185	Group_142
s_9002000001230056_7.strict	91.19	0.48	0	1939620	106001	kSGB_2318	Species	k__Bacteria|p__Bacteroidetes|c__Bacteroidia|o__Bacteroidales|f__Rikenellaceae|g__Alistipes|s__Alistipes_putredinis|t__SGB2318	0.0214792	143	143_1	Bacteria	Bacteroidota	Bacteroidia	Bacteroidales	Rikenellaceae	Alistipes	putredinis	Group_143
s_9002000001295079_7.permissive	97.52	0.96	0	2219191	109899	kSGB_2318	Species	k__Bacteria|p__Bacteroidetes|c__Bacteroidia|o__Bacteroidales|f__Rikenellaceae|g__Alistipes|s__Alistipes_putredinis|t__SGB2318	0.0188988	143	143_2	Bacteria	Bacteroidota	Bacteroidia	Bacteroidales	Rikenellaceae	Alistipes	putredinis	Group_143
s_9002000001303715_21.permissive	96.1	1.68	0	2036066	30556	kSGB_2318	Species	k__Bacteria|p__Bacteroidetes|c__Bacteroidia|o__Bacteroidales|f__Rikenellaceae|g__Alistipes|s__Alistipes_putredinis|t__SGB2318	0.0178781	143	143_3	Bacteria	Bacteroidota	Bacteroidia	Bacteroidales	Rikenellaceae	Alistipes	putredinis	Group_143
s_9002000001421826_23.permissive	96.55	0.96	0	2176173	25821	kSGB_2318	Species	k__Bacteria|p__Bacteroidetes|c__Bacteroidia|o__Bacteroidales|f__Rikenellaceae|g__Alistipes|s__Alistipes_putredinis|t__SGB2318	0.0190136	143	143_1	Bacteria	Bacteroidota	Bacteroidia	Bacteroidales	Rikenellaceae	Alistipes	putredinis	Group_143
s_9002000001480326_10.strict	91.28	0.96	0	2112733	45281	kSGB_2318	Species	k__Bacteria|p__Bacteroidetes|c__Bacteroidia|o__Bacteroidales|f__Rikenellaceae|g__Alistipes|s__Alistipes_putredinis|t__SGB2318	0.0202365	143	143_1	Bacteria	Bacteroidota	Bacteroidia	Bacteroidales	Rikenellaceae	Alistipes	putredinis	Group_143
s_9002000001572150_6.strict	92.55	2.64	33.33	2130652	13626	kSGB_2318	Species	k__Bacteria|p__Bacteroidetes|c__Bacteroidia|o__Bacteroidales|f__Rikenellaceae|g__Alistipes|s__Alistipes_putredinis|t__SGB2318	0.0208153	143	143_1	Bacteria	Bacteroidota	Bacteroidia	Bacteroidales	Rikenellaceae	Alistipes	putredinis	Group_143
s_9002000001588517_12.strict	96.39	1.84	20	2049352	31898	kSGB_2318	Species	k__Bacteria|p__Bacteroidetes|c__Bacteroidia|o__Bacteroidales|f__Rikenellaceae|g__Alistipes|s__Alistipes_putredinis|t__SGB2318	0.0180975	143	143_2	Bacteria	Bacteroidota	Bacteroidia	Bacteroidales	Rikenellaceae	Alistipes	putredinis	Group_143
s_9002000001295079_5.strict	96.63	0.96	0	2455591	70574	uSGB_2312	Family	k__Bacteria|p__Bacteroidetes|c__Bacteroidia|o__Bacteroidales|f__Rikenellaceae|g__GGB1680|s__GGB1680_SGB2312|t__SGB2312	0.0224274	144	144_1	Bacteria	Bacteroidota	Bacteroidia	Bacteroidales	Rikenellaceae	Alistipes	merdavium	Group_144
s_9002000001402221_2.permissive	97.72	0.88	0	2293949	40164	uSGB_2312	Family	k__Bacteria|p__Bacteroidetes|c__Bacteroidia|o__Bacteroidales|f__Rikenellaceae|g__GGB1680|s__GGB1680_SGB2312|t__SGB2312	0.0218472	144	144_2	Bacteria	Bacteroidota	Bacteroidia	Bacteroidales	Rikenellaceae	Alistipes	merdavium	Group_144
s_9002000001444393_9.permissive	94.26	1.92	0	2328523	26395	uSGB_2313	Family	k__Bacteria|p__Bacteroidetes|c__Bacteroidia|o__Bacteroidales|f__Rikenellaceae|g__GGB1681|s__GGB1681_SGB2313|t__SGB2313	0.0179383	145	145_0	Bacteria	Bacteroidota	Bacteroidia	Bacteroidales	Rikenellaceae	Alistipes	avistercoris	Group_145
s_9002000001372130_17.permissive	92.16	0.16	0	2889679	19030	kSGB_2303	Species	k__Bacteria|p__Bacteroidetes|c__Bacteroidia|o__Bacteroidales|f__Rikenellaceae|g__Alistipes|s__Alistipes_finegoldii|t__SGB2303	0.0287383	146	146_3	Bacteria	Bacteroidota	Bacteroidia	Bacteroidales	Rikenellaceae	Alistipes	onderdonkii	Group_146
s_9002000001380900_64.strict	97.81	0.48	0	3002670	55721	kSGB_2303	Species	k__Bacteria|p__Bacteroidetes|c__Bacteroidia|o__Bacteroidales|f__Rikenellaceae|g__Alistipes|s__Alistipes_finegoldii|t__SGB2303	0.0178649	146	146_1	Bacteria	Bacteroidota	Bacteroidia	Bacteroidales	Rikenellaceae	Alistipes	onderdonkii	Group_146
s_9002000001410009LL_45.permissive	91.69	1.2	0	2633912	14290	kSGB_2303	Species	k__Bacteria|p__Bacteroidetes|c__Bacteroidia|o__Bacteroidales|f__Rikenellaceae|g__Alistipes|s__Alistipes_finegoldii|t__SGB2303	0.0234597	146	146_2	Bacteria	Bacteroidota	Bacteroidia	Bacteroidales	Rikenellaceae	Alistipes	onderdonkii	Group_146
s_9002000001525624_31.permissive	92.43	0	0	2996961	121015	kSGB_2301	Species	k__Bacteria|p__Bacteroidetes|c__Bacteroidia|o__Bacteroidales|f__Rikenellaceae|g__Alistipes|s__Alistipes_finegoldii|t__SGB2301	0.023125	147	147_0	Bacteria	Bacteroidota	Bacteroidia	Bacteroidales	Rikenellaceae	Alistipes	finegoldii	Group_147
s_9002000001226394_24.orig	91.59	1.11	0	2283793	12430	uSGB_2227	Other	k__Bacteria|p__Bacteroidetes|c__CFGB658|o__OFGB658|f__FGB658|g__GGB1627|s__GGB1627_SGB2227|t__SGB2227	0.0179194	148	148_6	Bacteria	Bacteroidota	Bacteroidia	Bacteroidales	UBA932	Cryptobacteroides	sp000431015	Group_148
s_9002000001346051_30.strict	94.6	0.63	0	2538575	56320	uSGB_2227	Other	k__Bacteria|p__Bacteroidetes|c__CFGB658|o__OFGB658|f__FGB658|g__GGB1627|s__GGB1627_SGB2227|t__SGB2227	0.0182582	148	148_7	Bacteria	Bacteroidota	Bacteroidia	Bacteroidales	UBA932	Cryptobacteroides	sp000431015	Group_148
s_9002000001388285_24.strict	90.79	0.48	0	2366532	57452	uSGB_2227	Other	k__Bacteria|p__Bacteroidetes|c__CFGB658|o__OFGB658|f__FGB658|g__GGB1627|s__GGB1627_SGB2227|t__SGB2227	0.0195707	148	148_5	Bacteria	Bacteroidota	Bacteroidia	Bacteroidales	UBA932	Cryptobacteroides	sp000431015	Group_148
s_9002000001392457_33.strict	94.6	1.11	0	2431995	25585	uSGB_2227	Other	k__Bacteria|p__Bacteroidetes|c__CFGB658|o__OFGB658|f__FGB658|g__GGB1627|s__GGB1627_SGB2227|t__SGB2227	0.0172054	148	148_3	Bacteria	Bacteroidota	Bacteroidia	Bacteroidales	UBA932	Cryptobacteroides	sp000431015	Group_148
s_9002000001462829_16.permissive	91.27	1.11	0	2352906	18766	uSGB_2227	Other	k__Bacteria|p__Bacteroidetes|c__CFGB658|o__OFGB658|f__FGB658|g__GGB1627|s__GGB1627_SGB2227|t__SGB2227	0.0181378	148	148_1	Bacteria	Bacteroidota	Bacteroidia	Bacteroidales	UBA932	Cryptobacteroides	sp000431015	Group_148
[truncated: 246 more rows]

## Sheet: Table S2 HGT events
Table S2. Information of HGT events
[truncated: 5,645 more rows]

[truncated: 8 more sheets: Table S3 HGT segments info, Table S4 Function enrich, Table S5 pangenomes, Table S6 Cor_HGT_distance, Table S7 Association result, Table S8. Benchmark with WAAFL, Table S9 ARGs annotation, Table S10 Species Trait]
