# Supplementary material for: Longitudinal Gut Microbiota Tracking Reveals the Persistent Spread of Mobile Genes and HGT-Driven Community Stabilization
Source: Research Square preprint supplement (doi:10.21203/rs.3.rs-6509357/v1), 2025-05-07
Supplement: Supplementary file 2 [file dc0891cc9178ab6a219e34c3.docx]

**Supplementary Information**

**Longitudinal Gut Microbiota Tracking Reveals the Persistent Spread of Mobile Genes and HGT-Driven Community Stabilization**

**Authors**

Haoran Peng1, Sergio Andreu-Sanchez1,2, Angel J. Ruiz-Moreno1,2, Asier Fernández-Pato3, Jiafei Wu1,2, Ranko Gacesa1,3, Alexandra Zhernakova1, Daoming Wang1, Jingyuan Fu1,2,#

**Affiliations**

1 University of Groningen, University Medical Center Groningen, Department of

Genetics, Groningen 9713AV, the Netherlands

2 University of Groningen, University Medical Center Groningen, Department of

Pediatrics, Groningen 9713AV, the Netherlands

3 Department of Gastroenterology and Hepatology, University of Groningen,

University Medical Center Groningen, Groningen 9713 GZ, the Netherlands

# Lead contact: j.fu@umcg.nl

Table of contents

[Supplemental Notes 3](#_Toc195882813)

[Supplemental Note 1. Benchmarking the HGT Detection from MAGs at Individual level (HDMI) workflow 3](#_Toc195882814)

[Supplemental Note 2. HGT can transfer across multiple species/genera/families 4](#_Toc195882815)

[Supplemental Note 3. Transfer network of antibiotic resistance genes. 4](#_Toc195882816)

[Supplemental Note 4. Bacteria with gelatin hydrolysis, motility, and MoaC are more likely to be involved in HGT 5](#_Toc195882817)

[Supplemental Figure Legends 7](#_Toc195882818)

[Fig. S1. Overview of the HDMI workflow. 7](#_Toc195882819)

[Fig. S2. Benchmarking HDMI. 8](#_Toc195882820)

[Fig. S3. HGT transfer across multiple species/genera/families. 9](#_Toc195882821)

[Fig. S4. Recent transfer contributes to the spread of antibiotic resistance genes (ARGs). 10](#_Toc195882822)

[Fig. S5. Bacteria with high survival ability and motility are more involved in HGT. 11](#_Toc195882823)

[Fig. S6. Antimicrobial peptide resistance genes (AMPRs) and virulence factors (VFs) are enriched in closely related communities with frequent gene transfer. 12](#_Toc195882824)

[Fig. S7. Temporal change in HGT segments. 13](#_Toc195882825)

[References 14](#_Toc195882826)

# Supplemental Notes

## Supplemental Note 1. Benchmarking the HGT Detection from MAGs at Individual level (HDMI) workflow

**Impact of sequence depth on HDMI**

Since HDMI’s horizontal gene transfer (HGT) detection relies on identifying highly homologous fragments and split-read detection—and requires sufficient read coverage at both ends of the insertion site—we first evaluated the impact of sequencing depth on detection sensitivity. We downloaded representative genomes from NCBI (see **Table S8**) and simulated the insertion of genes with varying identities. We then employed ART to simulate metagenomic sequencing data at 6X, 9X, and 12X coverage. Our results show that HDMI recovered 67.3% of HGT events at 6X coverage, 97.9% at 9X, and 100% at 12X (**Fig. S2a**, see **Methods**).

**Comparison with WAAFLE**

Most HGT detection tools cannot distinguish between recent and long-term HGT events because they only identify novel HGT events by comparing to a reference genome1,2. To address this limitation, reference-free methods such as MetaCHIP and WAAFLE have been developed to detect novel HGT events. However, MetaCHIP—a MAG-based HGT detection method that relies on phylogenetic tree comparisons—is not applicable at the individual level3. In contrast, the recently published tool WAAFLE can infer HGT events from assembled contigs at the individual level and has demonstrated superior performance to MetaCHIP4. We therefore compared the performance of HDMI to that of WAAFLE.

To evaluate the recovery of HGT events under realistic metagenomic sequencing and processing pipelines, we first simulated gene insertions with 99%–100% identity in selected genomes using HgtSIM. Next, we generated metagenomic data using ART, assembled the data, and binned the resulting contigs to obtain MAGs. Based on both contigs and machine assembled genomes (MAGs), we compared HDMI and WAAFLE’s abilities to detect HGT events at the genus, order, and phylum levels. Our results indicate that HDMI consistently recovered 40%, 36%, and 31% of HGT events at the genus, order, and phylum levels, respectively. In contrast, WAAFLE’s detection rate was only 2% within genera, while its performance at the order and phylum levels was 24% and 26%, respectively (**Fig. S2b**, see **Methods**). These findings demonstrate that HDMI significantly outperforms existing methods, particularly in detecting HGT events within genera.

## Supplemental Note 2. HGT can transfer across multiple species/genera/families

7581 HGTs segments were further clustered into 1,445 unique HGT clusters if they showed >99% identity for >90% of their sequence (see **Methods**, **Table S6**). Each cluster thus represents the transmission of the same gene content across different species. We further annotated Pfam5 protein domains within HGT clusters to characterize gene functions. We found that individual HGT clusters can be shared in up to eight species, seven genera, and four different families (**Fig. S3a–c**). Within those widely transmitted segments, we detected genes encoding recombinase, sigma factor6, and, in particular, phage integrase, which may facilitate HGT. For example, we detected recombinase and sigma factor genes in three HGT clusters that were shared between seven genera (**Fig. S3d–f**). One HGT cluster shared between four different *Bacteroidota* families (*Rikenellaceae*, *UBA932*, *Muribaculaceae,* and *Bacteroidaceae*) was 2,705 bp long and contained two genes that encode phage integrases, which could be further classified using geNomad7 as a bacteriophage belonging to the Caudoviricetes class (**Fig. S3g**). Interestingly, our data also suggest that bacterial recombinases may be more likely to mediate cross-species or cross-genus gene transfer, whereas phages may allow cross-family gene transfer (**Fig. S3a–c**). For example, we found recombinase in three clusters over five cross-genera transfers, but no phage integrase was found (**Fig. S3b**). In contrast, in 15 clusters with three or more cross-family transfers, phage integrase was found in three segments, while no recombinase was detected (**Fig. S3c**).

## Supplemental Note 3. Transfer network of antibiotic resistance genes.

Antibiotic resistance is a major threat for human health, and HGT can mediate the spread of antibiotic resistance genes (ARGs). To explore how often this is the case in our data, we annotated ARGs in HGT clusters (**Fig. S4**, **Table S9**). Overall, we identified ARGs in 10 HGT clusters, and these could be assigned to three antibiotic classes: glycopeptides, diaminopyrimidine, and tetracycline (**Fig. S4**). By constructing a network of ARG transfer, we found that transfer of glycopeptide resistance was mostly related to *Agathobacter*, and the sequence similarity of the transferred genes ranged between 99.15% and 99.55%, suggesting that these events occurred in the distant past8. In addition, by comparing the phylogenetic trees of species and genes using RANGER-DTL (see **Methods**), we found that *Agathobacter* can receive diaminopyrimidine-resistant genes from *Holdemanella* and *Catenibacterium* (**Fig. S4**). *Agathobacter*’s ability to receive ARGs from other bacteria may enable this bacterium to thrive more effectively in the gut. We also observed that tetracycline-resistant genes were recently transferred, especially the transfer between *Prevotella*, *Bacteroides*, *Anaerobutyricum*, *Bacteroides*, and *Phocaeicola*. Their similarities are 100%, suggesting this transfer happened within the last 100 years, possibly even within the host. These latter two observations reveal the potential impact of widespread recent use of diaminopyrimidine and tetracycline antibiotics in humans.

## Supplemental Note 4. Bacteria with gelatin hydrolysis, motility, and MoaC are more likely to be involved in HGT

To characterize the phenotypic characteristics and roles of species in the HGT network, we predicted bacterial traits, ultimately retaining 22 high-confidence traits (>90% predictive accuracy using the phypat + PGL method) based on their pangenome, including energy resources for growth, enzymatic activities, and morphology (**Fig. S5a**, see **Methods**). In addition to the predicted bacterial traits, we also integrated information on whether the species' pangenome carries the functions of MoaC, MoCF, and FdhD-NarQ. We then constructed a HGT network connecting species that had at least one HGT event between them and calculated the node (species) degree centrality and the betweenness centrality. A species with a high degree centrality is connected to multiple other species via HGT events. This suggests that it serves as a hub capable of engaging in gene transfer with a diverse array of species. A species with a high betweenness centrality lies on many of the shortest paths between other species. This indicates that it acts as a bridge or mediator, facilitating the spread of genes across different groups of species (**Fig. S5b**, **Table S4**).

The HGT network centrality degree could be influenced by species abundance and species phylogenetic distance. For instance, we observed that most of the species in the center belong to *Firmicutes_A* (**Fig. S5b**). Previous studies have found that abundant species have higher HGT rates and are more likely to be the donors in the transfer9,10. In our approach, highly abundant species were more likely to assemble high-quality genomes and phylogenetically close bacteria could also share traits. We therefore adjusted the bacterial abundance and phylogeny using a linear mixed model fit for the influence of bacterial traits (independent variable) on HGT network centrality (dependent variable) (see **Methods**). The model results showed that bacteria capable of gelatin hydrolysis were more likely to hold key network positions, both in terms of centrality (Likelihood-ratio test (LRT), *p*-value = 1.48x10-6) and as connectors between other species (LRT, *p*-value = 2.38x10-4) (**Fig. S5c**). This suggests that bacteria that can efficiently utilize proteins derived from undigested dietary proteins have a greater survival advantage and are therefore more likely to mediate recent transfers. Interestingly, bacteria with motile ability (LRT, *p*-value = 2.28x10-3) or sucrose utilization ability (LRT, *p*-value = 0.035) and those that carry MoaC function (LRT, *p*-value = 0.023) tended to occupy more central positions in the HGT network, suggesting that their ability to move may allow them to interact more frequently with a variety of other microbes, increasing opportunities for gene transfer. These findings indicate that bacterial traits like protein utilization and motility promote gene exchange across different species.

# Supplemental Figure Legends

Fig. S1. Overview of the HDMI workflow.

The HDMI workflow first identified putatively transferred DNA within the genomes of different species that exhibited high homology in these segments across various species' genomes and little homology with the flanking DNA. Second, we searched for two types of reads that partially map to the same transferred DNA and different flanking DNAs, to suggest true HGT events. Third, inspired by the detection of differential alternative splicing events in transcriptomes, we inferred whether each HGT in the sample is inserted and established the ratio of insertion to non-insertion by calculating the number of reads mapping to the split sites of sequences with HGT insertion and the junction site with no HGT insertion.

Fig. S2. Benchmarking HDMI.

**a**, HDMI’s performance in recovering HGT events introduced between genomes in simulated metagenomic sequencing data at 6X, 9X, and 12X coverage.

**b**, Comparison of HDMI and WAAFLE results showing the percentage of gene transfers recovered by WAAFLE after assembly of simulated reads and the percentage recovered by HDMI after genome binning.

Fig. S3. HGT transfer across multiple species/genera/families.

**a-c**, The number of (A) species, (**b**) genera, and (**c**) families shared by each HGT segment. Segments encoding recombinase are highlighted in blue. Segments encoding phage integrase are highlighted in yellow.

**d**–**g**, The HGT segment transfer pattern of (**d**) HGT segment 236 at species level, (**e**) HGT segment 152 at genus level, (**f**) HGT segment 355 at genus level, and (**g**) HGT segment 497 at family level. Each node represents a genome, with the corresponding taxonomy classification indicated by color. Each edge represents a HGT observed between these two genomes. The identity of the HGT is labeled at the edge. The Pfam domains carried in the HGT segment are shown.

Fig. S4. Recent transfer contributes to the spread of antibiotic resistance genes (ARGs). ARG transfer network. Edge width and label reflect the HGT event's identities. Dots are colored by genus classification. Clusters encoding the same ARG are circled and labeled with their antibiotic names.

Fig. S5. Bacteria with high survival ability and motility are more involved in HGT.

**a**, *Species traits annotation.* The 22 traits for all species participating in least one HGT event were predicted, including energy resources for growth, enzymatic activities, and morphology. Each species is listed alongside its assigned group number. Predictions are encoded as: 0 represents a negative prediction and 1 indicates the prediction validated by both classifiers. Details of the species' classification within their respective phyla are annotated at upper right. Trait categories are annotated at lower right.

**b**, *HGT network.* An inter-species HGT network is built based on at least one HGT event in two species. ﻿Nodes are colored by phylum, sized by betweenness centrality, and labeled by species clade number corresponding to panel A. Species traits are annotated by shapes (motile: down-triangle, none: circle). The nodes of species with gelatin hydrolysis ability are highlighted in red.

**c**, Association between bacterial traits and HGT network degree and betweenness centrality. A linear mixed model was used to measure the effect of species traits on inter-species HGT network centrality. In the model fit, species abundance and phylogeny are corrected for the influence of bacterial traits on HGT network centrality (see Methods, Significance ** *p*-value < 0.01, * *p*-value < 0.05).

Fig. S6. Antimicrobial peptide resistance genes (AMPRs) and virulence factors (VFs) are enriched in closely related communities with frequent gene transfer. The heatmap indicates number of ARGs, AMPs, and VFs per 1k genes and the proportion of CAZy function of each species’ pangenome. Rows representing species are split by their community classification. The phylum classification is indicated at right.

Fig. S7. Temporal change in HGT segments. Heatmap shows the gain (orange) or loss (blue) of HGTs in each individual after 4 years. White indicates no change. Gray indicates NA. Species information is annotated at right.

# References

1 Trappe, K., Marschall, T. & Renard, B. Y. Detecting horizontal gene transfer by mapping sequencing reads across species boundaries. *Bioinformatics* **32**, i595-i604 (2016). <https://doi.org/10.1093/bioinformatics/btw423>

2 Li, C., Jiang, Y. & Li, S. LEMON: a method to construct the local strains at horizontal gene transfer sites in gut metagenomics. *BMC bioinformatics* **20**, 702 (2019).

3 Song, W., Wemheuer, B., Zhang, S., Steensen, K. & Thomas, T. MetaCHIP: community-level horizontal gene transfer identification through the combination of best-match and phylogenetic approaches. *Microbiome* **7** (2019). <https://doi.org/10.1186/s40168-019-0649-y>

4 Hsu, T. Y. *et al.* Profiling lateral gene transfer events in the human microbiome using WAAFLE. *Nature Microbiology* (2025). <https://doi.org/10.1038/s41564-024-01881-w>

5 Finn, R. D. *et al.* Pfam: the protein families database. *Nucleic Acids Res* **42**, D222-230 (2014). <https://doi.org/10.1093/nar/gkt1223>

6 Torres-Puig, S. *et al.* Activation of σ20-dependent recombination and horizontal gene transfer in Mycoplasma genitalium. *DNA Res* **25**, 383-393 (2018). <https://doi.org/10.1093/dnares/dsy011>

7 Camargo, A. P. *et al.* Identification of mobile genetic elements with geNomad. *Nature Biotechnology* (2023). <https://doi.org/10.1038/s41587-023-01953-y>

8 Butler, M. S., Hansford, K. A., Blaskovich, M. A. T., Halai, R. & Cooper, M. A. Glycopeptide antibiotics: Back to the future. *The Journal of Antibiotics* **67**, 631-644 (2014). <https://doi.org/10.1038/ja.2014.111>

9 Hsu, T. Y. *et al.* Profiling novel lateral gene transfer events in the human microbiome. *bioRxiv* (2023). <https://doi.org/10.1101/2023.08.08.552500>

10 Groussin, M. *et al.* Elevated rates of horizontal gene transfer in the industrialized human microbiome. *Cell* **184**, 2053-2067.e2018 (2021). <https://doi.org/10.1016/j.cell.2021.02.052>
